# Supplementary material for: Molecular Signatures of Neuroinflammation Induced by αSynuclein Aggregates in Microglial Cells
Source: Front Immunol. 2020 Jan 31;11:33. doi: 10.3389/fimmu.2020.00033 (PMC7006296; doi:10.3389/fimmu.2020.00033)
Supplement: Supplementary file 1 [file Data_Sheet_1.xlsx]

## Sheet: SuppTable1
Supplementa Table 1. Log2 transformed LFQ abundance values and differential expression analysis: Mouse microglia
GeneSymbol	UniqueID	Ctl_1	Ctl_2	Ctl_3	Ctl_4	Ctl_5	Ctl_6	Syn_1	Syn_2	Syn_3	Syn_4	Syn_5	Syn_6	Unadj_Pvalue	FDR	Log2FoldChange
Irg1	P54987	21.7764	20.7196	21.1651	18.6982	21.9523	20.0588	32.0587	32.1377	32.0413	32.0421	31.9764	32.1948	5.77515e-10	8.04912e-08	11.3468
Ifit3	Q64345	22.2781	22.1201	19.8038	21.3164	21.712	23.9875	29.6033	29.7705	29.6399	29.712	29.7241	30.1052	6.59791e-08	1.49122e-06	7.88953
Cmpk2	Q3U5Q7	25.8785	26.0288	25.9134	25.7369	25.5638	26.0382	31.8034	31.7978	31.7746	31.8476	31.7182	31.6881	4.02138e-15	1.34515e-11	5.91169
Pyhin1	Q8BV49	21.8944	22.3367	21.4803	22.4533	22.3198	21.857	27.5853	27.5544	27.5754	27.6964	27.5103	27.5039	7.67756e-12	6.42036e-09	5.51401
Ptgs2	Q05769	22.2023	22.3465	22.0352	21.9739	21.7879	22.4363	27.1122	26.8982	26.9882	27.1268	26.9895	27.2245	7.8122e-13	1.30659e-09	4.9262
Rsad2	Q8CBB9	22.6678	22.6116	21.5158	21.7181	22.5879	21.5762	27.115	26.9553	26.832	26.8173	26.9545	27.0588	1.58508e-09	1.45606e-07	4.84256
Saa3	P04918	21.6301	22.6032	21.7818	22.4583	21.6337	21.7074	26.5632	26.9833	26.7418	26.8896	26.3376	26.8419	4.91024e-10	7.4658e-08	4.75712
Parp14	Q2EMV9	25.2788	24.9545	23.9271	23.6868	23.4783	22.8516	28.2781	28.2362	27.4914	27.9725	28.1411	28.4386	1.36087e-06	1.47318e-05	4.06348
Gbp2	Q9Z0E6	22.057	21.6494	21.8045	22.5839	22.7362	21.6641	26.0109	25.9166	25.994	25.5871	25.7019	25.924	4.93676e-09	2.70892e-07	3.77324
Ifih1	Q8R5F7-2	22.0093	22.1849	21.9823	21.932	22.0191	21.3159	25.5386	25.3496	26.6523	24.8854	25.3203	24.9276	2.51993e-07	3.95736e-06	3.53835
Ifit1	Q64282	23.3073	26.7727	26.9922	25.5185	27.2818	27.1705	30.1393	29.4467	29.3114	29.41	29.8594	29.3911	0.000342788	0.00142771	3.41913
Gbp5	Q8BMN7	21.5924	21.6527	22.7613	21.4504	22.1633	22.6369	25.8317	25.3138	25.514	25.2868	25.1539	25.0801	1.39433e-07	2.50754e-06	3.32053
Ifitm3	Q9CQW9	22.6038	21.8524	24.9972	25.1961	24.5397	24.8291	26.8277	27.1443	27.3482	26.9998	27.6265	27.6435	0.000258882	0.00114092	3.26195
Ifi205	Q8CGE8	22.0613	21.8775	22.7341	21.4899	22.7471	21.898	25.2451	25.4269	25.1374	25.7067	25.4008	25.4408	4.1463e-08	1.07669e-06	3.25832
Hspa1a	Q61696	22.0843	22.4092	21.5297	22.0748	21.5401	21.5067	24.8696	24.976	25.1761	25.2811	24.8892	24.5419	1.48994e-08	5.47676e-07	3.09818
Phf11d	A6H5X4-3	22.24	21.8661	22.5299	22.0357	22.2281	21.547	25.5301	25.1918	25.3834	22.355	25.366	25.341	0.000329267	0.00139189	2.78675
Gpr84	Q8CIM5	21.8352	22.6206	22.5801	21.803	22.0363	21.8724	24.7446	25.0947	24.9207	25.1834	24.4359	25.0289	4.5673e-08	1.13471e-06	2.77678
Gbp3	Q61107	22.176	21.4854	21.529	22.6955	21.8488	21.7634	24.7111	24.8312	24.9494	24.0657	24.6787	24.8044	2.4627e-07	3.93379e-06	2.75707
Marcksl1	P28667	26.7187	26.2566	26.561	26.3128	26.353	26.2848	28.8677	29.4232	29.2371	28.9347	28.8214	29.1842	1.01104e-09	1.08148e-07	2.66357
Stk10	O55098	21.8973	22.7479	22.5352	22.6737	22.8741	22.9131	25.5915	24.5945	25.1911	25.3154	25.333	25.1036	1.83435e-07	3.14734e-06	2.58129
Isg15	Q64339	25.5319	25.8899	25.4094	25.4123	25.4581	25.5494	27.8047	28.1883	28.1267	28.3081	27.9912	28.2002	2.73715e-10	5.03487e-08	2.56136
Stat2	Q9QXJ2	23.3652	24.5292	23.6506	22.0169	23.5312	21.9711	25.7313	25.7953	25.4078	26.0033	25.7767	25.7026	0.000108826	0.00055155	2.55878
Cd40	P27512-4	22.5517	21.7673	21.8013	21.4948	22.7264	21.6474	24.4262	24.4814	24.2502	24.7197	24.3309	24.6791	5.67416e-07	7.41809e-06	2.48313
Itga5	P11688	22.9818	24.1664	25.3239	25.1414	25.3916	22.336	26.3382	26.9573	26.5499	26.9545	26.6443	26.6488	0.00108118	0.00370548	2.45866
Igtp	Q9DCE9	24.1357	22.0466	24.0342	25.7181	23.8296	23.8563	26.3419	26.3815	26.5912	26.7714	25.6505	26.4164	0.000691563	0.00258006	2.42205
Il1rn	Q3TBV5	22.8106	21.9379	25.2718	25.3805	24.8893	24.8387	26.6784	26.7771	26.5435	26.2724	26.3965	26.8187	0.00249567	0.00748701	2.39299
Tlr2	G3X8Y8	23.555	24.8016	24.9439	25.3581	24.8204	24.8198	27.106	27.065	26.8327	27.1533	26.9839	27.1356	3.31911e-06	3.11865e-05	2.32961
Hck	F6UND7	21.4565	22.5151	21.5125	21.8011	21.8631	22.1562	23.9193	24.3876	24.2905	23.7622	24.248	24.54	4.77799e-07	6.41863e-06	2.3072
Slc2a1	P17809	24.9461	24.9518	25.2752	21.6551	24.4664	22.7106	25.9368	26.3259	26.2948	26.2095	26.4372	26.2684	0.00400518	0.0111552	2.24457
Nufip2	Q5F2E7	22.7154	22.2272	22.3648	22.6911	22.704	22.5388	25.5416	24.6661	24.7321	24.0176	24.8843	24.767	1.18095e-06	1.33907e-05	2.22788
Dck	P43346	23.5361	23.3952	21.5996	22.069	23.4671	23.0904	25.242	24.6604	25.0586	24.6067	25.1315	25.3998	0.000133514	0.000651979	2.15691
Fhod3	Q76LL6-4	22.501	22.5377	22.3226	21.4718	21.622	22.2512	25.5397	25.3436	25.5176	21.9553	21.7281	25.5573	0.0215502	0.046582	2.15589
Lrrc25	Q8K1T1	22.3344	22.645	22.619	25.4161	25.5313	25.4941	26.0284	26.2079	26.0891	26.0791	26.1444	26.4147	0.00875401	0.0218198	2.15398
Xaf1	Q5NBU8-3	21.7489	22.1649	22.1748	21.7499	21.8	21.5744	24.0812	23.9691	24.105	24.019	24.0332	23.6005	1.25055e-08	4.80814e-07	2.09921
Lilrb4a	Q64281-2	22.3275	21.7836	22.6196	24.8477	25.3226	24.6246	25.7031	25.8289	25.369	25.572	25.5966	25.4783	0.00910535	0.0226113	2.00373
Junb	P09450	22.648	21.4486	22.485	22.5966	21.9521	21.5278	24.0594	24.1787	24.2106	24.179	23.8377	24.091	5.67887e-06	4.79575e-05	1.98306
Gnl2	Q99LH1	25.1147	25.9521	22.5655	21.7313	24.1053	24.4039	25.5538	25.956	26.1971	25.4439	25.7622	26.851	0.0151079	0.0343315	1.98187
Ccl9	P51670	23.6374	24.6531	22.5699	23.7414	23.7194	24.438	25.6215	25.8909	25.8814	25.8093	25.9	25.3956	8.85385e-05	0.000464931	1.95657
Usp18	Q9WTV6	21.7062	21.4428	21.8599	21.6258	21.717	21.7743	23.7141	23.2877	23.62	23.634	23.8083	23.5859	1.50901e-09	1.45606e-07	1.92066
Sqstm1	Q64337	27.6735	27.7465	28.0563	27.8435	27.9158	27.7382	29.608	29.7131	29.6932	29.7318	29.7691	29.921	1.2171e-10	3.02596e-08	1.91039
Clybl	Q8R4N0	21.712	21.8865	21.747	22.4764	21.5303	22.2698	24.3449	22.669	24.7627	22.512	24.5264	24.2087	0.00126158	0.00419065	1.90028
Iigp1	Q9QZ85	21.9545	22.2924	22.3945	22.6449	21.7838	22.3796	24.3224	23.9825	24.2114	24.3399	24.0081	23.7898	3.12579e-07	4.66061e-06	1.86743
Rnf114	Q9ET26	21.8534	24.2686	24.2423	21.673	22.9315	23.9594	24.9999	24.9619	24.4739	25.3283	25.1931	25.1403	0.00387706	0.0108798	1.86152
Ppil1	Q9D0W5	25.7961	21.4709	22.1016	25.5544	22.6777	25.2545	25.5688	25.3903	25.7401	25.8	25.9206	25.5828	0.0414057	0.0807121	1.8579
Slfn9	B1ARD6	23.8852	23.5882	23.2874	23.4815	24.3874	23.9393	25.5916	25.5415	25.5513	25.8506	25.8097	25.3241	1.16639e-06	1.32707e-05	1.84994
Helz2	A2AS05	23.6033	24.6348	23.2232	24.3665	23.8107	24.7358	25.5753	26.1023	25.4208	25.6265	26.2351	26.1244	9.53124e-05	0.000495062	1.78504
Oasl1	Q8VI94	27.8838	27.8404	28.0255	28.0075	27.972	27.9743	29.6342	29.6762	29.7104	29.8348	29.6886	29.6683	1.22298e-12	1.36362e-09	1.7515
Ddx58	Q6Q899	26.9302	27.3862	27.2582	26.8501	26.7754	27.3236	28.7438	28.7058	28.9371	28.8425	28.6433	28.9816	5.99296e-08	1.37305e-06	1.72173
C130026I21Rik	Q3KNJ6	25.8585	26.2021	26.2463	25.9512	25.8288	25.966	27.6936	27.8424	27.7195	27.6524	27.5287	27.9278	4.15464e-09	2.43812e-07	1.71858
C130026I21Rik	Q8C898	22.8542	21.4227	22.161	21.5566	22.6798	22.7242	23.8155	24.5571	24.0988	23.9866	23.6335	24.1152	8.73684e-05	2.43812e-07	1.71858
Trex1	Q91XB0	25.5635	24.5094	25.5652	24.9116	25.4794	25.4276	26.7922	26.8257	26.9242	27.0872	26.996	27.1019	3.26228e-06	3.07389e-05	1.71173
Cebpb	P28033-3	23.1934	22.6637	21.751	23.8262	22.8758	23.8869	24.7413	24.59	24.5842	25.1488	24.7339	24.6655	0.000480069	0.00192777	1.71111
Lcp2	Q60787	25.6675	26.7872	26.1214	25.8186	26.1388	26.3946	27.7962	28.2493	27.6248	27.665	27.7905	27.8593	4.45665e-06	3.98596e-05	1.67619
Msr1	P30204-2	24.3492	24.1311	23.7576	24.2211	24.6177	24.5162	26.4518	25.861	26.0977	25.4932	25.6547	25.9547	4.73849e-06	4.18213e-05	1.65337
Irak3	Q8K4B2	20.5112	21.5626	21.7493	22.3885	21.4276	22.5886	22.6677	23.5513	23.5034	22.9829	23.5594	23.62	0.000865345	0.00310577	1.60947
Irgm1	Q60766-2	26.4259	26.456	26.5959	26.0214	26.6672	26.3899	28.0384	27.9869	28.0729	28.0515	28.024	27.9432	1.05431e-08	4.43643e-07	1.59341
Esf1	Q3V1V3	25.9746	24.5863	25.6422	25.9617	25.4129	25.2613	26.7287	27.221	26.7773	27.4209	27.2096	26.9084	6.74339e-05	0.000372222	1.57113
Dhx58	Q99J87	21.4961	21.6951	21.8125	22.5375	22.6481	21.5531	22.8907	24.1135	21.7178	24.2961	24.0014	24.1483	0.00707726	0.0181963	1.5709
Nadk	P58058	22.3296	23.9764	22.4569	24.1488	24.3105	24.1276	24.9604	25.18	25.171	24.643	25.1372	25.6534	0.0026674	0.00789596	1.56586
Cyb5r1	Q9DB73	22.962	24.0154	23.5689	24.3891	21.487	22.0292	25.0977	24.1564	24.8213	24.0446	24.9682	24.6977	0.0107418	0.0258686	1.55574
Ehd1	Q9WVK4	27.5363	27.6613	27.5414	27.6525	27.9459	27.9319	29.1897	29.1266	29.4822	29.1754	29.2854	29.2485	1.10023e-08	4.47452e-07	1.53976
Akap13	E9PVD4	21.4469	20.6552	19.8089	20.329	20.731	20.3525	22.7846	21.9233	22.7502	22.4072	20.57	21.9414	0.00379138	0.0106752	1.50888
Icam1	P13597-2	25.8967	25.9999	25.2389	25.6424	25.2167	25.5899	27.1737	26.9798	27.109	27.1041	26.8813	27.0697	1.06506e-06	1.23275e-05	1.45551
Marf1	Q8BJ34-3	21.856	23.4493	23.4108	23.515	23.8671	22.1841	24.6799	24.4624	24.5373	24.3061	24.6949	24.3065	0.00169163	0.0053635	1.45078
Tap1	Q3TBA3	24.2766	22.3946	23.8806	24.1174	24.4081	24.1506	25.189	25.358	25.3178	25.3932	25.2582	25.3605	0.000819633	0.00296077	1.44146
Frmd8	D3Z5B2	21.6284	21.7786	21.8229	21.4418	19.8819	20.4658	22.654	22.5436	22.8157	22.6021	22.5221	22.4874	0.00151345	0.00485843	1.43423
Gvin1	L7N451	25.4936	23.9408	24.4684	24.5051	24.782	24.4187	26.2204	26.5448	26.0723	25.5063	25.4951	26.3624	0.000417268	0.00169801	1.43208
Ifi204	E9QKL6	29.4039	29.2039	29.1437	29.1663	29.2658	29.2155	30.6231	30.7287	30.5475	30.8671	30.6385	30.5256	7.96793e-10	1.00711e-07	1.4219
Ifi204	Q08619	26.417	26.5169	26.7919	25.8735	26.6484	26.1452	28.9384	29.5113	29.2499	29.0683	29.005	29.3937	1.17908e-08	1.00711e-07	1.4219
Ifi204	P15092-2	25.0213	24.3308	24.6898	24.6116	24.0432	24.5503	25.8959	26.0195	25.883	26.5136	26.0547	25.8665	4.59379e-06	1.00711e-07	1.4219
Src	Q80XU2	22.4525	21.7969	21.4429	21.9592	21.9437	21.7731	23.3568	23.3427	23.6293	23.9407	23.5699	22.0233	0.00089814	0.00318587	1.41574
Parp9	Q8CAS9-2	25.5035	25.7162	25.4276	25.7429	25.5631	25.8997	27.238	26.9408	27.0913	27.1713	26.885	26.7976	8.22418e-08	1.76345e-06	1.37851
Ddx24	F8WJA0	23.6616	23.892	22.9797	24.1756	24.7442	23.5906	25.4198	25.4087	25.1938	24.7712	25.1658	25.3475	0.000373064	0.00153493	1.37719
Bst2	Q8R2Q8	21.8355	24.3786	24.2873	23.9434	24.3657	24.0256	24.9195	25.1199	25.4126	25.58	25.0946	24.8368	0.00881075	0.021896	1.35458
Parp10	Q8CIE4	22.8705	22.5381	21.3571	21.4184	22.3405	21.6349	22.4449	24.3099	24.7076	21.7894	24.6414	22.3524	0.0478331	0.091169	1.34769
Hmgcs1	Q8JZK9	25.4012	25.9286	25.6105	24.5964	25.7301	25.3107	27.0471	26.6705	26.6909	27.0191	26.3913	26.8017	9.52002e-05	0.000495062	1.34049
Malt1	Q2TBA3-2	23.7137	23.3853	23.7393	23.6454	21.8636	23.4656	25.093	24.5201	24.7134	25.0467	24.1018	24.35	0.00252318	0.00754922	1.33536
Stat1	Q8C3V4	27.3342	27.4737	27.4356	27.1304	27.4355	27.4913	28.578	28.7594	28.6319	28.7636	28.827	28.6921	2.37566e-09	1.83604e-07	1.32526
Gatad2a	E9QMN5	21.8755	24.4586	24.0787	21.6445	22.622	24.0363	24.349	24.8469	24.2397	24.723	24.1569	24.1837	0.0304781	0.0621642	1.29727
Dtx3l	Q3UIR3	25.0367	24.1103	24.87	24.979	25.0175	25.3646	26.0578	26.2288	26.1392	26.2445	26.365	26.0545	2.87481e-05	0.000184928	1.28532
Ikzf1	Q5SWU0	22.236	21.904	24.6261	24.0327	24.1022	23.7784	24.8739	24.7359	24.5706	24.8054	24.7364	24.6468	0.0180351	0.0399766	1.28161
Eif2b1	Q99LC8	22.9254	22.7703	22.0488	23.7249	23.0882	23.038	24.1202	23.8121	24.6376	23.5571	24.7275	24.4281	0.00136793	0.00445978	1.28114
Utp11l	Q9CZJ1	25.3928	25.8192	24.18	25.4635	22.5033	25.7299	26.1004	25.9135	26.0247	26.157	26.4213	26.0611	0.0387403	0.0764973	1.26491
LOC102641031	O35368	23.762	22.4127	24.1251	23.7395	22.2233	21.6874	24.2557	24.4149	24.2383	24.3936	24.2474	23.9458	0.0129093	0.0300369	1.25763
Brd2	Q7JJ13-2	22.0179	21.4571	22.4473	22.0965	21.7075	22.5136	23.9719	22.4967	24.2553	21.7872	24.7299	22.489	0.0347678	0.0695564	1.24835
Naa10	Q3V4D5	24.7176	24.9392	21.3078	24.3878	24.1088	24.5778	25.2981	25.1236	25.2075	25.2705	25.2349	25.346	0.0487313	0.0924596	1.24029
Ddx10	Q80Y44	25.4573	24.4988	24.6079	24.756	25.3483	24.4836	26.1631	26.3077	26.4706	25.947	25.7013	25.9271	0.000169767	0.000798691	1.22745
Oas2	E9Q9A9	23.1905	22.6497	22.2456	22.6419	23.1303	22.6175	24.1122	23.8752	24.183	24.1791	23.5443	23.7484	5.90369e-05	0.000333016	1.19445
0610037L13Rik	D6REH4	24.0357	24.2083	22.0325	23.9308	22.213	22.1939	24.2933	24.4408	24.18	24.5123	24.375	23.8966	0.0227743	0.0484914	1.18065
Mylk	B1B1A8	23.2706	23.9456	21.4726	21.7894	21.6233	23.0812	23.9699	23.9345	23.2587	23.7362	23.9581	23.3746	0.023789	0.0503634	1.1749
Zfp326	O88291	21.9245	22.8024	22.658	21.5768	22.8783	21.9074	23.3126	23.068	23.3665	23.3818	23.7888	23.8208	0.00104669	0.00361318	1.16517
Tapbp	Q3TCU5	27.1434	27.2302	26.3784	27.6779	26.7715	26.3533	28.2729	28.0795	28.1463	27.9251	28.0205	28.0455	0.00034793	0.00144575	1.15585
Nfkb2	Q9WTK5	25.2855	25.6495	25.2577	25.652	25.4957	24.8129	26.4543	26.6502	26.5281	26.27	26.7557	26.4038	1.48191e-05	0.000105468	1.15146
Sp110	Q8BVK9	26.4066	25.1483	25.4979	24.9204	25.7622	25.8121	26.7677	26.5114	26.7784	26.6224	26.7385	26.9795	0.000486904	0.00194184	1.14175
Rer1	Q9CQU3	24.8639	24.4357	22.4725	22.6276	24.2701	24.8007	25.3214	25.0383	24.8435	24.7711	25.3281	24.9883	0.0302955	0.0619049	1.13671
Dcaf13	Q6PAC3	24.9842	24.3866	25.0503	24.2975	24.3052	25.0212	25.9778	25.8186	25.7633	26.0385	25.7645	25.4817	6.87398e-05	0.000378164	1.13321
Flnb	Q80X90	26.379	25.1602	25.5285	26.5553	26.5718	26.3012	27.2851	27.006	26.8949	27.2588	27.4785	27.3705	0.00136662	0.00445978	1.13299
Fam207a	P58468	24.807	24.2125	24.3384	24.1088	24.7971	24.2198	25.963	25.7775	25.3154	25.5028	25.3728	25.2665	6.24006e-05	0.000350218	1.11909
Mina	Q8CD15	25.9464	24.6955	24.8516	24.3809	25.0876	25.5966	26.4	26.8397	26.2984	26.2992	25.4201	26.0132	0.00445402	0.0121424	1.11865
Zc3hc1	H3BKM2	22.2692	22.271	21.7948	21.8732	21.9417	21.8901	23.1796	23.2989	23.7696	21.8975	23.2169	23.3365	0.00223973	0.00683804	1.10983
Tmem258	P61166	22.0874	22.6339	23.0138	23.2613	23.0636	21.9539	23.4841	23.6673	23.2387	23.4429	24.3231	24.3826	0.00433579	0.0118985	1.08749
Ppp2r5d	Q91V89	24.4748	23.9858	22.1049	23.9996	22.3559	24.2623	25.019	24.7048	24.2906	24.5828	24.6203	24.4748	0.0304342	0.0621126	1.08485
Alg2	Q9DBE8	21.6829	21.5614	23.2667	21.3321	22.8997	22.2433	24.0192	22.2747	23.5983	23.3343	22.4097	23.8213	0.03351	0.0675654	1.0786
Gripap1	A2AEW9	22.5567	24.1681	24.3563	24.4907	21.9319	24.4229	24.5867	24.7018	24.5144	25.0638	25.1453	24.3663	0.0461835	0.0886174	1.07528
Dohh	Q99LN9	22.1912	23.8597	24.1275	23.4169	21.9338	22.3861	23.8589	23.6482	24.0091	24.5384	23.9546	24.2732	0.0247373	0.0520417	1.06121
Sp100	Q3U5P2	25.1415	24.9566	24.8017	25.2712	24.4147	24.8199	26.2969	25.9244	26.1741	25.8666	25.6765	25.8255	4.47644e-05	0.000264553	1.05971
Ylpm1	E9Q803	22.6008	21.6262	21.3343	22.1233	21.8813	21.413	22.2376	22.5211	24.0091	22.3515	23.1802	23.0117	0.0101635	0.0246711	1.05538
Vps36	Q91XD6	22.2368	23.8027	24.4798	22.66	24.3647	24.1337	24.5228	25.3477	24.5394	24.7286	24.7255	24.1391	0.0299108	0.0612312	1.05422
Abhd17b	Q7M759	20.9808	20.616	19.9996	21.6125	21.6059	20.5364	21.7536	21.8031	22.2375	22.4718	21.4492	21.9531	0.00564531	0.0150587	1.05283
Zfr	O88532	23.7153	24.4961	23.8504	22.1944	22.7165	24.3772	24.7418	24.4531	24.7056	24.6932	24.3258	24.7373	0.0204897	0.0445052	1.05112
Slc15a3	Q8BPX9	21.9142	22.7512	21.5471	22.6907	22.6069	21.8281	22.9759	23.8336	23.7188	22.3132	23.108	23.686	0.00830113	0.0209406	1.04959
Marcks	P26645	27.159	27.5248	27.187	27.2502	26.9358	27.0579	28.3109	28.4561	28.1933	27.9469	28.0425	28.4563	4.96625e-06	4.31884e-05	1.04855
Tceb3	Q8CB77	24.141	24.3523	24.1216	24.006	25.1085	23.5258	24.6654	25.5866	25.4967	24.7528	25.6291	25.3086	0.00374957	0.0105753	1.03067
Actg1	P63260	21.7466	22.756	22.6516	22.8577	22.5673	22.2387	24.3326	24.1348	23.7439	22.3591	23.2478	23.1444	0.0133676	0.0309444	1.02411
Eif2ak2	Q03963	26.072	25.5498	25.8366	26.1722	26.3265	25.7835	26.9507	26.8855	26.8373	26.8666	27.0395	27.296	1.98804e-05	0.000135162	1.02248
Ptk2b	E9Q2A6	25.2659	25.1173	24.7544	25.0445	25.2802	25.1103	26.6919	25.9802	26.6882	25.815	25.7902	25.6942	0.000536762	0.00210736	1.01453
Nup153	E9Q3G8	25.4779	25.4956	24.5836	25.2956	25.554	25.2741	26.2175	26.5382	26.1301	26.1193	26.1257	26.6102	0.000163584	0.000776154	1.01004
Alas1	Q8VC19	22.3357	21.9787	21.9207	21.8111	22.8093	21.7214	22.5696	23.4284	23.246	23.5418	22.7724	23.0462	0.00128951	0.00425645	1.00459
Tor3a	Q9ER38	23.7488	23.5432	23.4368	23.7433	24.2045	23.7801	24.8924	24.4313	25.037	24.6123	24.296	25.2099	0.000251545	0.00111891	1.0037
Rps19bp1	Q8C6B9	21.5762	23.4214	23.2203	22.7581	24.0456	21.6824	23.7006	24.1253	23.9051	23.2349	23.6388	24.1204	0.040114	0.0784228	1.00351
Pik3ap1	Q9EQ32-2	25.0257	24.8937	25.1916	25.038	25.2896	24.924	25.9328	26.2175	25.9015	26.2062	26.3125	25.7543	3.96532e-06	3.61417e-05	0.99371
Wtap	E0CYH0	22.1381	22.2408	23.0028	22.5958	22.7498	22.6125	23.4679	23.6166	23.6556	23.264	23.854	23.4246	8.27173e-05	0.000440588	0.990477
Hnrnph2	P70333	24.9742	26.1823	25.7713	26.2702	26.4153	25.8091	26.7036	26.7309	27.4033	26.2676	27.135	27.0978	0.00439531	0.0120314	0.985965
Eif1ad	Q3THJ3	24.0084	24.152	24.4537	24.1796	24.3351	23.8529	25.1248	25.1098	25.248	25.6385	24.9948	24.6964	8.90813e-05	0.000466318	0.971749
Armc6	Q8BNU0	25.8561	26.1782	25.5495	25.4589	25.6902	25.7599	27.1085	26.8795	26.5566	26.5509	26.6596	26.5369	4.29578e-05	0.000256596	0.966502
Nle1	Q8VEJ4	25.6803	25.5946	25.8025	25.7029	25.9039	25.3835	26.5866	26.6757	26.5683	26.5812	26.8309	26.605	4.42549e-07	6.01759e-06	0.96332
Isy1	Q69ZQ2	22.4495	23.223	21.4035	23.2901	21.9221	23.6537	24.0319	23.4774	23.3855	23.6766	23.4211	23.6918	0.0279122	0.0579195	0.957047
Nhlrc2	Q8BZW8	21.7171	21.5173	22.5296	21.6423	21.6539	21.806	22.0412	21.8045	23.1859	23.4539	23.016	23.0978	0.0121687	0.0286316	0.955499
Rpl35	Q6ZWV7	29.6791	29.7377	29.534	29.2312	28.4335	29.305	30.4425	30.1911	30.2006	30.032	30.3432	30.3955	0.00095094	0.00333777	0.947412
Caprin1	Q60865	28.8199	28.866	28.7019	28.5684	28.6631	28.6147	29.5996	29.5533	29.7928	29.635	29.7149	29.6081	2.01431e-08	6.67117e-07	0.944947
Ankrd17	E9QKG6	24.3512	24.2055	24.8359	24.2862	24.8417	24.3801	24.7212	25.3721	25.418	25.8771	25.6631	25.492	0.000744106	0.00272621	0.940445
Clic4	Q9QYB1	29.4182	29.322	29.3685	29.335	29.5259	29.3801	30.3642	30.2978	30.2437	30.2812	30.3636	30.3355	1.95046e-10	4.07769e-08	0.92271
Sf3a2	G3UVU2	25.5366	25.7061	25.0949	25.8137	25.8359	25.6983	26.309	26.6209	26.6943	26.4137	26.5871	26.5667	2.79968e-05	0.000181491	0.917697
Rock2	F8VPK5	21.1755	21.8392	21.054	21.5831	21.9033	21.4612	23.7716	21.8757	23.3027	21.5227	22.2843	21.7613	0.0439166	0.0848649	0.917
Pml	Q60953	24.4908	24.5743	24.3416	24.3452	22.5876	24.7077	25.0667	25.1347	25.512	24.8311	24.9669	25.03	0.0213493	0.0461923	0.915731
Snrpb	P27048	28.1285	28.2354	27.8929	28.0868	27.6785	27.9333	28.961	29.067	28.8386	28.7206	28.9375	28.8886	2.23688e-06	2.22029e-05	0.909633
Oas1a	P11928	27.6855	27.6277	27.7019	27.8217	27.5973	27.577	28.5882	28.4974	28.6013	28.4797	28.5811	28.6991	4.42211e-09	2.55034e-07	0.905961
AI607873	D3Z2E7	27.446	27.3041	27.0934	27.1528	27.3593	27.4044	28.2815	28.2149	28.2688	28.0735	28.2691	28.0273	2.46965e-07	3.93379e-06	0.89587
Sod2	P09671	28.8482	28.6421	28.5799	28.573	28.7175	28.7891	29.6828	29.5029	29.6699	29.3638	29.503	29.7788	4.35116e-07	5.96502e-06	0.8919
Ebf2	O08792	23.9423	24.0079	23.4419	22.5058	23.7949	23.6939	24.3177	24.5572	24.2971	24.7611	24.3108	24.4721	0.00400088	0.0111524	0.888222
Ppm1g	Q61074	27.5432	27.5627	27.3805	27.4645	27.6119	27.3063	28.4543	28.2806	28.3116	28.4181	28.3549	28.3489	1.70094e-08	5.98909e-07	0.883209
Rnf126	Q91YL2	24.3673	24.9588	22.6655	23.8226	24.0594	23.9272	24.9911	24.9209	24.7016	24.5599	24.961	24.9192	0.0200992	0.0438851	0.875474
Yy1	Q00899	21.9992	23.8348	23.3593	22.3949	21.9471	22.5522	23.5799	23.8842	23.5039	23.6984	23.3801	23.2918	0.0218835	0.0470742	0.875129
Mbd2	Q9Z2E1	23.7649	23.873	24.0324	23.7079	21.6144	24.0212	24.4481	24.5261	24.5971	24.2845	24.0488	24.3588	0.0485517	0.0921913	0.874988
Cd44	Q3U8S1	28.5226	28.383	28.3873	28.4401	28.2288	28.3663	29.0778	29.3298	29.2521	29.2228	29.2567	29.4009	4.49164e-08	1.13184e-06	0.868674
Ppig	A2AR02	22.1621	24.0075	24.2882	24.1618	24.1249	24.2121	24.4725	24.8582	24.4495	24.7941	24.7593	24.7916	0.0307667	0.0626763	0.861404
Slc39a7	Q31125	21.5548	22.0879	20.9631	22.2119	21.5214	20.8935	23.3396	22.0546	23.1165	21.818	21.9833	22.0219	0.0354653	0.070867	0.850203
Lima1	Q9ERG0-2	26.4015	26.4765	26.1196	26.5357	26.0235	25.8581	27.1615	27.0824	26.9102	27.2126	27.0307	27.0477	3.81032e-05	0.000233863	0.83837
Slc7a8	Q9QXW9	23.8998	23.5287	24.2486	23.9817	23.6378	24.3458	24.816	25.2288	24.545	25.1386	24.4719	24.4214	0.00163711	0.00521535	0.829897
Thoc6	Q5U4D9	25.2455	25.3524	24.9865	23.486	25.2178	24.835	25.1199	25.6357	25.8883	25.7658	25.5097	26.1825	0.0267918	0.0558371	0.829777
Kctd12b	Q8C7J6	22.7269	22.0227	22.4376	21.9816	22.1001	22.1497	23.2072	23.4197	22.983	23.1649	22.477	23.0998	0.000871854	0.00312578	0.822167
Cirh1a	Q8R2N2	25.7223	25.4731	25.5602	25.5244	25.8563	25.5863	26.8616	26.4788	26.457	26.1928	26.2921	26.3608	2.37168e-05	0.000156475	0.82008
Gm4184	P60060	22.3034	23.154	22.9644	23.8761	23.7066	23.4148	23.6988	24.21	24.2237	23.6101	24.3065	24.2639	0.0115535	0.0274089	0.815585
Fcgr1	P26151	24.4916	24.2274	24.6262	24.6557	24.9293	24.5264	25.1974	25.3756	25.0745	25.7677	25.4919	25.4245	0.000137746	0.00066971	0.812479
Larp4	E9Q066	25.1538	25.0103	26.0553	26.0413	26.4949	25.5012	26.5358	26.375	26.6407	26.8498	26.1689	26.5434	0.00998268	0.0243028	0.809515
Ppp1r10	Q80W00-2	23.879	23.3457	23.4454	23.4499	24.5342	23.0256	24.454	24.2054	25.1701	23.9336	24.4785	24.2942	0.0145036	0.0331441	0.809326
Oas3	Q8VI93	28.1454	28.2311	27.8585	28.151	28.1817	28.1284	28.8707	28.9981	28.9085	28.9188	28.9366	28.9053	5.43639e-08	1.2897e-06	0.806982
Ciapin1	E0CYY1	23.6313	23.9018	23.727	23.7977	24.3065	23.9606	24.7583	24.4482	25.1055	24.2119	24.9918	24.6127	0.000746825	0.00273318	0.80059
Rpl39	P62892	26.9417	27.1144	26.8449	26.6941	26.1199	26.5975	27.5893	27.4335	27.4658	27.5511	27.5002	27.5555	0.000236439	0.00105452	0.797169
Rbm34	B2RUP0	23.8602	23.4568	24.0161	22.1393	23.7117	24.0678	24.5754	24.2061	24.7324	24.3166	24.0161	24.1798	0.0298009	0.0611559	0.795757
Wdr46	Q9Z0H1	26.4771	25.5711	26.1674	26.1286	26.1585	26.7772	26.994	27.0045	26.8623	27.376	26.9016	26.9158	0.00137187	0.00446827	0.795713
Cd14	P10810	26.846	26.5495	26.6711	26.7007	26.7908	26.7546	27.3436	27.5292	27.5189	27.6022	27.3813	27.691	4.00484e-07	5.62865e-06	0.792239
Znfx1	Q8R151	23.5163	23.0412	22.6705	22.5844	23.4157	21.7294	24.1627	23.7219	23.7283	23.9682	23.5314	22.5756	0.0483881	0.0920172	0.78842
Ngdn	Q9DB96	24.7482	24.5529	24.151	24.6719	25.153	24.7666	25.5306	25.4998	25.6493	25.249	25.4954	25.3458	0.000291618	0.00125542	0.787701
Luc7l2	Q7TNC4-4	28.0971	28.1128	28.0323	27.8519	27.951	28.0807	28.7888	28.8812	28.7948	28.7078	28.8896	28.778	2.21915e-08	7.20685e-07	0.78575
Ppfibp1	Q8C8U0	23.3785	22.2849	22.3553	23.4348	22.4702	22.7447	22.8287	24.057	23.0918	23.8589	23.8098	23.6771	0.0222932	0.0477406	0.775801
Asns	Q61024	29.2364	29.1136	29.2256	29.0791	29.1666	29.193	29.917	29.889	29.9459	29.9837	29.9822	29.9154	1.83494e-10	4.07769e-08	0.769813
Crlf3	Q9Z2L7-2	24.228	24.0627	24.2269	23.853	24.4631	22.8154	24.9247	25.1578	25.1164	24.6135	24.2824	24.151	0.0273523	0.0569344	0.766138
Rmdn3	Q3UJU9	23.7284	23.0669	23.1015	24.0164	23.3113	23.3372	24.8158	24.1438	24.5923	23.4371	24.0692	24.088	0.0115819	0.0274567	0.7641
Fam129a	E9PYV4	24.8642	24.8718	24.3768	24.6263	24.8139	24.7425	25.1999	25.6318	25.5471	25.6034	25.4336	25.462	1.85008e-05	0.000126814	0.763739
Acta1	P68134	30.0692	30.6389	30.9096	30.9566	30.7259	30.5335	31.1697	31.2555	31.5641	30.973	31.7047	31.7267	0.00194125	0.00604606	0.760018
Nmi	O35309	24.8212	24.5886	24.4767	24.7498	24.3983	24.6376	25.4824	25.5298	25.3089	25.3304	25.1373	25.4149	5.77139e-06	4.83842e-05	0.755258
Lsg1	Q3UM18	26.3866	26.8212	25.8729	25.9538	26.8711	26.2819	27.3405	27.309	27.0441	26.4055	27.042	27.5774	0.00992941	0.0242002	0.755169
Utp14a	Q640M1	26.571	26.3327	26.522	25.9001	26.5086	26.6118	27.2344	27.3865	27.2015	26.8207	27.0916	27.21	0.00022424	0.00101089	0.749776
Wdr75	Q3U821	25.8391	25.6223	25.9883	25.6158	25.6039	26.0687	26.7179	26.6753	26.2942	26.5214	26.5717	26.4349	3.46251e-05	0.000215681	0.746193
Sec61a1	P61620	27.1031	27.644	27.344	27.5118	27.3551	27.2655	27.9473	28.0778	28.1312	27.9795	28.3169	28.2	1.60237e-05	0.000112604	0.738173
1110037F02Rik	E9PZY8	23.7646	23.1594	22.6249	22.9882	23.1958	23.1883	24.6246	23.6817	23.7725	23.2581	24.1055	23.8893	0.0119429	0.0281728	0.735107
Slc3a2	P10852	29.354	29.2853	29.3353	29.2945	29.2842	29.332	30.0522	30.1024	30.0394	30.0806	29.9651	30.0128	2.81115e-11	1.2939e-08	0.727868
Eif5b	Q05D44	28.5134	28.3626	28.2843	28.1547	28.4922	28.3316	29.262	29.0425	29.1818	28.7629	29.1548	29.0641	1.11205e-05	8.28465e-05	0.721545
Tgm2	P21981	27.4105	27.4038	27.6471	27.3312	27.5134	27.6551	28.1287	28.2929	28.182	28.385	28.229	28.0655	1.67412e-06	1.73372e-05	0.72034
Myd88	P22366	24.4769	23.9268	23.7907	24.3479	25.2023	24.3569	25.5282	25.0225	25.2744	24.8166	25.0719	24.7041	0.0125933	0.0293961	0.719364
Hmga2	P52927	26.2513	26.3496	26.8528	26.0557	26.4878	26.4024	27.1838	27.313	27.1849	27.1664	26.7514	27.1101	0.000320841	0.00136715	0.718338
Ncdn	Q9Z0E0-2	21.7297	21.5549	21.5185	21.686	22.1369	21.7816	22.1574	22.879	22.6448	22.3463	22.7244	21.9487	0.00196914	0.00611832	0.715522
Rnf213	F7A6H4	30.4392	30.424	30.4602	30.4209	30.4445	30.429	31.0985	31.1948	31.1029	31.2204	31.1576	31.1272	1.27041e-11	8.49906e-09	0.713931
Clk3	O35492	22.7084	22.6261	22.2546	22.8356	23.3261	22.768	23.9951	23.8085	23.6944	22.7518	23.2584	23.2774	0.0124302	0.0290559	0.711156
Bzw2	Q91VK1	26.066	25.856	25.7759	25.6205	25.5747	25.7533	26.796	26.269	26.7103	26.057	26.6615	26.4191	0.000421872	0.00171466	0.71109
Ddx21	Q9JIK5	30.789	30.6872	30.7934	30.7672	30.8235	30.7855	31.4111	31.5317	31.3979	31.6471	31.4546	31.4588	1.21406e-08	4.72213e-07	0.709251
Ddx54	Q8K4L0	24.236	23.6073	23.86	24.6459	24.5594	24.4165	25.5008	25.1245	25.1882	24.0523	24.8581	24.8463	0.0221379	0.0474992	0.707551
Tes	Q3ULB1	26.6826	26.5885	26.5406	26.3457	25.5847	26.4766	27.1374	27.1173	26.8903	27.0068	27.2822	27.0043	0.00224877	0.006857	0.703304
Atp13a1	Q9EPE9	25.2579	26.1445	24.774	25.5917	25.5393	25.2214	26.5216	26.106	26.3993	25.9362	26.0137	25.7665	0.00976946	0.0239111	0.702422
Mlkl	Q9D2Y4-2	25.3992	25.4217	25.3184	25.3029	25.366	25.4637	26.0744	26.0764	25.9887	26.1763	26.1523	26.0103	6.85453e-09	3.17028e-07	0.701082
Themis2	Q91YX0	24.3085	24.4495	22.66	24.285	23.9902	23.4633	24.8055	24.6469	24.5857	24.9524	24.2528	24.1075	0.0472055	0.09023	0.699041
Nampt	Q99KQ4	29.3945	29.4179	29.5025	29.3353	29.4356	29.4157	30.1538	30.0947	30.0812	30.2348	30.1292	29.9781	1.14539e-08	4.56111e-07	0.695052
Ddx42	Q810A7-2	26.2792	26.2308	25.9864	26.3406	26.3755	26.2215	26.892	27.0544	26.9237	26.7923	26.7802	27.1505	7.23779e-06	5.83383e-05	0.693195
Baz1a	G3UWZ0	25.2891	25.0191	24.8053	25.5065	25.6119	24.9464	26.3161	25.7549	26.1126	25.6456	25.7288	25.7754	0.00228402	0.00693918	0.69251
Eif3h	Q91WK2	28.5647	28.5319	28.3826	28.3896	28.5624	28.3542	29.2732	29.1189	29.2745	28.9505	29.1426	29.1158	8.3442e-07	1.02472e-05	0.681692
Ifi35	Q9D8C4	25.416	25.4463	25.0981	25.3022	25.3987	25.2414	26.1218	25.8423	26.0352	26.0903	25.8819	26.0168	2.26884e-06	2.24535e-05	0.680958
Tuba1c	P68373	27.4962	27.7392	27.8464	27.5741	27.6546	27.581	28.2402	27.9056	28.3919	28.1957	28.6292	28.5972	0.000252371	0.00112109	0.67805
Sec24d	Q6NXL1	23.3996	23.5213	23.5058	22.0707	22.5084	23.3116	23.8037	23.7387	23.8545	23.6704	23.9933	23.3092	0.0300451	0.0614683	0.675409
Mcmbp	Q8R3C0	26.5909	25.6539	27.1946	26.8516	26.8707	26.6534	27.1996	27.4988	26.9406	27.5619	27.2829	27.3785	0.0160935	0.0361779	0.674502
BC017643	Q3TYS2	25.0053	25.2677	25.6143	25.4579	25.8574	25.863	26.002	26.287	26.119	26.49	26.3748	25.8388	0.00268208	0.00792606	0.674353
Eif3d	O70194	28.1983	28.403	28.4074	28.3628	28.4403	28.4386	29.0314	28.951	29.1124	28.9108	29.1964	29.0748	3.39643e-07	4.91821e-06	0.671068
Atxn2l	Q7TQH0-2	26.9763	26.4712	27.16	27.0686	26.6604	26.856	27.7353	27.6315	27.4459	27.4351	27.4608	27.5068	0.000191676	0.000888029	0.670469
Srpr	Q9DBG7	27.256	27.2135	27.3109	27.3709	27.2262	27.5091	27.9579	27.9887	28.0475	27.975	28.0243	27.9077	1.02358e-07	1.99063e-06	0.669087
Acsl1	D3Z041	26.1949	26.2227	26.519	26.2607	25.9097	26.6726	26.9261	26.9895	26.895	27.0939	27.045	26.8421	0.000180054	0.000838829	0.668655
Stat3	P42227-2	27.1083	26.818	26.7834	27.1121	26.8529	26.8071	27.7188	27.4502	27.5558	27.5901	27.7279	27.45	8.38603e-06	6.53876e-05	0.66849
Vasp	P70460	27.3524	27.2791	27.4151	27.4785	27.3791	27.5627	28.1157	28.0484	27.952	28.1691	28.084	28.098	1.17182e-07	2.22713e-06	0.666707
Samhd1	F8WJE0	28.0125	27.9064	28.0344	28.1589	28.1597	28.0496	29.096	28.5907	28.732	28.4666	28.674	28.7363	3.84601e-05	0.00023519	0.662365
Uck2	A0A0B4J1E5	24.691	24.5119	23.6195	25.2874	24.9939	24.7054	25.6967	25.1293	25.7577	24.6692	25.234	25.277	0.0422844	0.0821379	0.659135
Seh1l	Q8R2U0-2	25.3234	24.8587	24.9063	24.8206	24.8937	23.8033	25.5687	25.6238	25.5913	25.1726	25.4407	25.1421	0.0154278	0.0349397	0.655502
Llph	D3YXW1	23.3299	23.0698	23.6685	22.3089	22.2784	23.3288	23.3211	23.7093	23.5915	23.6171	23.6035	24.0589	0.0284237	0.0587076	0.652817
Rrp7a	Q9D1C9	25.8679	25.9152	26.0664	25.7913	25.5612	25.9822	26.288	26.543	26.4567	26.7087	26.5283	26.5716	3.19833e-05	0.000202835	0.652005
Eef1e1	Q9D1M4	26.8137	26.697	26.7747	26.8548	26.6127	26.9232	27.4151	27.4942	27.4978	27.2898	27.4685	27.4166	3.61547e-07	5.1767e-06	0.650977
Utp18	Q5SSI6	26.4352	26.7739	26.5358	26.5123	26.3302	26.9824	27.3743	27.1277	27.2478	27.0034	27.1404	27.5784	0.000504719	0.00200034	0.650364
Slc4a7	F8VQC9	24.9255	25.298	25.5651	25.1522	25.8169	25.4773	25.7629	26.0096	26.0803	25.671	26.2568	26.3467	0.00323744	0.00939222	0.648714
Dnaja1	P63037	29.5102	29.3577	29.4811	29.5431	29.3465	29.6023	30.1372	30.1376	30.0704	30.0769	30.1899	30.0642	8.14242e-08	1.75719e-06	0.639183
Eef1a1	P10126	34.6767	34.6758	34.7321	34.6547	34.6309	34.6488	35.3732	35.2306	35.3371	35.2466	35.3515	35.2916	5.73871e-10	8.04912e-08	0.635267
Gkap1	Q9JMB0	21.7771	22.1222	21.533	22.3733	22.217	21.5077	22.7655	22.7985	22.6988	22.1719	22.4095	22.4641	0.00580187	0.0153538	0.629644
Utp15	Q8C7V3	27.2477	27.2554	27.3038	26.8843	27.1319	27.3049	27.7331	27.811	27.695	27.9704	27.9197	27.7684	1.29198e-05	9.43594e-05	0.628274
Dnajc7	Q9QYI3	28.003	27.5948	27.7413	27.7091	27.555	27.7262	28.3626	28.2751	28.3543	28.4849	28.2863	28.3321	4.96972e-06	4.31884e-05	0.627643
Pstpip1	P97814	22.9836	23.2555	23.497	23.1175	21.9818	23.0175	23.7691	23.6717	23.4822	23.6674	23.2212	23.8007	0.0216797	0.046726	0.626568
Dnttip2	Q8R2M2	24.9147	24.7861	25.0853	25.1882	24.9263	24.8757	25.2171	25.7179	25.6737	25.723	25.7421	25.4503	0.000141811	0.000687477	0.624611
Pxk	Q8BX57-2	21.9021	21.6398	21.3024	21.5736	21.7243	22.6236	22.7866	22.343	21.8523	22.1535	22.8938	22.4764	0.0284324	0.0587076	0.623316
Pabpc4	Q91YZ8	28.1278	27.7813	28.0478	28.0342	27.8983	28.0291	28.5619	28.592	28.6577	28.686	28.6133	28.5419	5.68164e-07	7.41809e-06	0.622377
Nifk	Q91VE6	26.9595	26.9776	27.054	26.8411	26.8217	26.6732	27.4488	27.4534	27.4431	27.6113	27.5342	27.5695	1.79429e-06	1.84107e-05	0.622202
Plek	Q8CAG6	29.1258	29.2378	29.164	29.0797	29.2922	29.1463	29.6873	29.8537	29.7811	29.8177	29.8243	29.7994	2.255e-08	7.25285e-07	0.61963
Hnrnpdl	F6VQH5	26.9311	26.6235	26.9812	26.7462	26.5327	26.7087	27.5298	27.4934	27.4904	26.9983	27.4411	27.2732	0.000214871	0.000977883	0.617104
Nop14	Q8R3N1	26.2509	26.1084	26.3161	26.203	26.4982	26.44	26.8925	26.948	26.8584	27.0797	26.903	26.8247	5.26169e-06	4.48988e-05	0.614974
Ass1	P16460	29.2469	29.1134	29.2039	29.2868	29.16	29.1844	29.836	29.7342	29.8623	29.8733	29.8136	29.7555	6.32092e-09	3.10918e-07	0.613225
Apobec3	H3BJQ3	25.3591	25.3614	25.3109	25.2561	25.3435	25.7148	25.8686	26.0132	25.9021	26.0111	26.2669	25.9585	3.99902e-05	0.000242332	0.612428
Abcf2	Q99LE6	27.6536	27.7694	28.0734	27.9666	27.9815	27.9072	28.497	28.449	28.4458	28.4029	28.5873	28.6412	8.06499e-06	6.40793e-05	0.611891
Nop10	Q9CQS2	25.1014	25.1635	24.9287	24.9946	24.933	24.879	25.5596	25.441	25.7369	25.5228	25.6251	25.7815	5.2202e-06	4.47733e-05	0.611108
Eif4a1	P60843	32.1172	32.3054	32.3334	32.4049	32.292	32.3182	32.6999	32.8681	32.9455	32.9137	33.1628	32.8329	8.81407e-06	6.84062e-05	0.608642
Hsp90ab1	P11499	34.6234	34.6504	34.6494	34.6034	34.4702	34.5528	35.202	35.1417	35.2171	35.201	35.2729	35.1631	6.26825e-09	3.10918e-07	0.608046
Nvl	Q9DBY8	26.2205	26.1412	26.6102	26.2168	26.5031	26.2537	26.8397	26.8751	26.8334	26.9671	26.9338	27.1444	4.95544e-05	0.000289284	0.608004
Nes	Q6P5H2	27.7927	27.6207	27.6669	27.6637	27.7395	27.6271	28.4149	28.4304	28.3514	28.0152	28.2872	28.2514	4.50428e-06	4.00713e-05	0.606649
Rap2c	Q8BU31	25.9827	25.3769	25.53	25.5995	25.9685	25.4932	26.1079	26.1033	26.604	26.0707	26.441	26.2593	0.00128296	0.0042448	0.605912
Gemin5	A2AFQ9	26.5633	26.6123	26.8648	26.7558	26.6248	25.7307	27.2471	27.3763	27.0748	27.344	27.0154	26.7285	0.0105075	0.0253957	0.605738
Pdcl3	Q8BVF2	25.4079	24.8224	25.1316	25.0085	25.4646	25.1423	25.578	25.5248	26.2088	25.7889	25.947	25.5577	0.0022105	0.00677505	0.604672
Siglec1	G3X8X6	27.7035	27.9503	28.0412	27.8475	27.9657	27.9076	28.4019	28.5541	28.4391	28.6606	28.4644	28.5072	1.78128e-06	1.83334e-05	0.601901
Sec61b	Q9CQS8	27.5237	27.5951	27.5675	27.8225	27.6325	27.6392	27.8421	27.9478	28.2109	28.2952	28.4775	28.6029	0.000846416	0.00304764	0.59934
Fbll1	Q80WS3	25.1658	25.0186	25.1302	24.898	24.9617	24.7791	25.5753	25.7019	25.1987	25.7618	25.6222	25.6652	0.000154595	0.000736636	0.595262
Imp4	Q8VHZ7	25.6724	25.691	25.4494	25.9291	25.363	25.7979	26.4812	26.4289	25.8555	26.3403	26.0101	26.358	0.00128602	0.00425074	0.59518
Rbbp4	Q60972	28.3829	28.7796	28.1417	28.809	28.3359	28.4516	29.2113	29.0893	29.2491	28.8686	29.0473	28.9642	0.000709761	0.00263209	0.588195
Sh3glb1	Q3TYR7	25.322	25.4403	25.246	25.2123	24.9386	25.6783	26.0569	25.9604	25.8797	25.9577	25.6224	25.8881	0.000529781	0.00208485	0.587933
P4ha1	Q60715-2	28.4468	28.2665	28.2232	28.1452	28.2833	28.3304	28.8263	28.882	28.8825	28.9115	28.8655	28.8528	9.07152e-08	1.8731e-06	0.58753
Adpgk	Q8VDL4-3	25.4479	25.3218	25.5041	25.8002	25.8185	25.2332	25.8187	26.3479	25.7556	26.2227	26.1646	26.3372	0.00231208	0.00700536	0.586844
Rrp9	Q91WM3	27.8752	27.9217	27.6697	27.7379	27.9466	27.7966	28.3694	28.4222	28.4364	28.4435	28.33	28.4635	3.01038e-07	4.53591e-06	0.586224
Imp3	Q921Y2	25.5292	25.7051	25.8139	25.7889	25.6642	25.9507	26.2183	26.4848	26.4096	26.5627	26.1715	26.1159	0.000108144	0.000548926	0.585104
Tceb1	A0A087WQE6	28.1442	28.1901	28.0916	27.8415	27.6771	27.87	28.6489	28.4457	28.5888	28.3271	28.5901	28.7222	0.000182081	0.000847095	0.584708
Rbm19	Q8R3C6	25.4525	25.7031	25.319	25.3496	25.1541	25.2732	26.2463	26.058	26.0793	25.9167	25.6694	25.779	0.00050752	0.00200668	0.582855
Agfg1	A0A087WNV1	26.6409	26.5738	26.1896	26.4999	26.3511	26.1452	27.0552	26.8442	26.9043	27.1888	27.014	26.8627	0.000173085	0.000812021	0.578114
Gapdh	A0A0A0MQF6	34.3663	34.6104	34.2882	34.4806	34.1603	34.3719	34.9671	34.949	34.9861	34.9092	35.113	34.8132	1.65256e-05	0.000115645	0.57663
LOC102643269	P35550	30.1247	30.1761	30.0503	29.9138	29.9877	30.0761	30.6127	30.6829	30.5752	30.6772	30.5977	30.6007	1.05335e-07	2.03667e-06	0.569627
Eif4g2	G3XA17	28.9347	28.8984	28.9704	28.9307	28.8607	29.0305	29.3749	29.5599	29.417	29.7348	29.5041	29.4499	1.87072e-06	1.91362e-05	0.569206
Pabpc1	P29341	31.1646	31.2497	31.2246	31.2494	31.2044	31.2359	31.7332	31.7716	31.7852	31.8246	31.8216	31.7911	4.7401e-11	1.76174e-08	0.566418
Zfp598	Q80YR4-2	22.3302	22.2497	22.5023	22.0139	22.5485	22.2072	23.101	22.5826	22.2699	22.7878	22.6975	23.7911	0.0339266	0.0681999	0.563049
Slc25a22	Q9D6M3	26.3854	26.792	26.6613	26.8731	26.5569	26.4355	27.1817	27.1864	27.349	26.9442	27.1891	27.2272	0.000156594	0.000745101	0.562225
Gk	Q64516-1	25.6423	24.9961	24.83	25.3069	25.1508	25.1286	25.6022	25.7313	25.6771	25.9035	25.6152	25.885	0.00124247	0.00414778	0.559937
Aars	Q8BGQ7	29.3989	29.3548	29.2187	29.253	29.371	29.28	29.9446	29.8448	29.8525	29.9054	29.8985	29.7857	3.52156e-08	9.89884e-07	0.559172
Srsf10	Q3TFP0	27.2047	27.3757	27.1561	27.0723	27.1992	26.7599	27.5954	27.5785	27.8925	27.6458	27.7253	27.6796	0.000171526	0.000805833	0.558195
Nudcd1	Q6PIP5	26.4583	26.3196	26.5566	26.1767	26.4356	26.1267	26.8192	26.9658	26.8805	26.8267	27.0591	26.8706	3.28129e-05	0.000207093	0.55805
Stub1	Q9WUD1	24.7009	24.5117	24.6143	24.7022	24.9671	24.5599	25.2303	25.2268	25.2759	25.3141	25.449	24.8897	0.000254736	0.00112711	0.554955
Uprt	B1AVZ0	26.7265	27.0021	26.868	26.4162	26.3949	26.6678	27.3517	27.1311	27.3771	27.102	27.2797	27.1622	0.000498168	0.00197827	0.554721
Nisch	Q80TM9	26.655	26.3239	26.181	26.0081	26.4907	26.3626	27.1613	26.9834	26.7757	26.7574	26.8897	26.7568	0.000685495	0.00256773	0.55051
Smndc1	Q8BGT7	26.1198	26.1586	26.338	25.7448	25.9369	25.5285	26.5247	26.5371	26.4772	26.4283	26.5585	26.5997	0.00124038	0.00414493	0.549808
Csde1	Q91W50	29.0033	28.8577	28.9028	28.8763	28.8345	28.9499	29.4066	29.4461	29.4188	29.5748	29.5218	29.3496	1.35528e-07	2.47727e-06	0.548873
Eefsec	Q9JHW4	25.5026	24.5361	25.1404	24.7312	25.6516	25.2769	25.6417	26.0296	25.3548	25.5667	25.6366	25.8901	0.0223759	0.0478564	0.546797
Dnaja2	Q9QYJ0	29.0798	29.0032	28.7954	28.8604	28.9763	29.0106	29.5696	29.5491	29.5583	29.4567	29.4982	29.372	1.23573e-06	1.39176e-05	0.546387
Npm1	Q61937	32.3905	32.5758	32.6397	32.5261	32.4619	32.4739	32.9617	33.12	33.1182	32.8615	33.1579	33.1258	3.93307e-06	3.59457e-05	0.546159
LOC105242493	Q3U0V2	24.8205	25.1262	24.4917	24.5522	24.5022	24.5059	25.386	25.4596	25.4569	24.5346	25.0372	25.3957	0.0138729	0.0319153	0.545247
Pspc1	Q8R326-2	25.858	25.7869	25.7704	25.8819	26.11	26.1114	26.6228	26.3552	26.5869	26.4063	26.3643	26.4485	3.93174e-05	0.000239121	0.544231
LOC102642514	Q9CR47	24.0912	24.8369	24.4436	24.5489	24.3363	24.1678	24.9589	24.8368	24.8563	24.7714	24.9858	25.268	0.0021386	0.00658107	0.5421
Sart1	Q9Z315	26.5861	26.6948	26.6395	26.6169	26.9649	26.6713	27.307	27.2566	27.381	27.2578	27.1176	27.0942	2.06015e-05	0.000139498	0.540142
Gtpbp4	Q99ME9	27.9147	28.0621	27.9797	27.8891	28.0281	28.0405	28.3688	28.6114	28.4865	28.5198	28.6599	28.5017	9.07393e-07	1.08401e-05	0.538995
Rsl1d1	Q8BVY0	29.795	29.7459	29.7578	29.6171	29.8156	29.8327	30.2229	30.3054	30.2	30.425	30.2855	30.3548	4.14541e-07	5.75369e-06	0.538247
Rpl24	Q8BP67	29.5525	29.6352	29.5097	29.4773	29.4388	29.5167	29.9811	30.0632	30.071	29.9448	30.178	30.1125	2.72766e-07	4.18533e-06	0.536714
Rpl21	Q9CQM8	29.8077	30.166	30.0758	30.088	29.9604	30.005	30.4584	30.4046	30.5285	30.5067	30.7471	30.6601	2.62618e-05	0.000170574	0.533711
Naf1	E9QJT2	23.252	23.4964	22.9789	23.1376	23.7859	23.7503	24.0713	23.7865	24.0243	23.9586	23.8993	23.8556	0.00380319	0.0106905	0.532405
Upf2	A2AT37	22.7635	21.5373	22.2499	21.7529	22.0044	21.9605	22.8496	22.4451	22.1037	22.6237	22.8518	22.5822	0.0289335	0.0595585	0.53125
Cnp	P16330-2	21.962	21.7516	21.874	21.8992	22.327	21.9832	22.7365	22.5979	22.5164	22.4303	22.2522	22.4332	0.000485784	0.0019414	0.528261
Lgals9	B1AQR8	26.4251	26.1548	26.1813	26.3427	26.3504	26.3826	26.9063	26.8838	26.748	26.822	26.8096	26.8356	1.1282e-06	1.2924e-05	0.528066
Mphosph10	Q810V0	26.4786	26.551	26.7005	26.6572	26.5327	26.5623	27.1954	27.0905	27.1543	27.1038	26.9594	27.1373	5.95023e-07	7.68475e-06	0.526391
Rpl30	P62889	30.8228	30.9495	30.9611	30.9766	30.8885	30.8011	31.4038	31.3002	31.5392	31.3419	31.527	31.437	9.81176e-07	1.15973e-05	0.524911
Eif3f	Q9DCH4	29.1337	29.1487	29.1586	29.2417	29.1091	29.1425	29.6093	29.6439	29.7171	29.7915	29.7403	29.5633	1.27477e-07	2.36657e-06	0.521851
Rrs1	Q9CYH6	26.6532	26.5538	26.5674	26.4095	26.5846	26.4871	27.2236	27.0866	26.9346	27.1015	26.8977	27.1323	6.80317e-06	5.53073e-05	0.520112
Nip7	Q9CXK8	27.17	27.0695	26.9824	26.9798	27.2138	27.2073	27.6123	27.5952	27.7622	27.4671	27.6711	27.6331	5.2487e-06	4.48988e-05	0.519698
Papss1	Q6NZM8	21.9133	21.8134	21.4496	21.0853	21.5483	21.3084	22.0504	22.0189	21.6767	22.6525	21.9836	21.8272	0.0197318	0.0431673	0.515143
Ppfia1	B2RXW8	24.8809	25.5107	26.0005	25.6906	25.7639	25.1823	25.7922	25.8652	26.0243	26.1985	26.0778	26.149	0.0170882	0.0380814	0.513027
Shtn1	Q8K2Q9	26.8176	26.5792	26.6447	26.5508	26.6422	26.5759	27.2844	27.0854	27.0974	27.2729	26.9876	27.1593	8.27321e-06	6.49246e-05	0.512767
Heatr3	Q8BQM4	25.837	26.0502	25.8503	25.8777	25.7848	25.9121	26.4654	26.4402	26.3424	26.5431	26.4694	26.1076	3.9821e-05	0.000241745	0.509332
Myl12b	Q3THE2	26.9221	27.2498	27.0378	27.2083	27.1637	27.0035	27.5018	27.4798	27.5913	27.6264	27.766	27.6751	2.22881e-05	0.000149107	0.509208
Noc4l	Q8BHY2	25.7978	25.9149	25.8915	25.9403	25.9205	25.8225	26.772	26.3095	26.6269	26.4402	26.1201	26.0685	0.00137683	0.00448007	0.508284
Lsm12	Q9D0R8	25.0617	24.9189	25.1427	24.9976	25.2673	25.3694	25.5326	25.5901	25.5968	25.7215	25.7016	25.6529	5.08526e-05	0.00029583	0.506315
Ddx47	F6QKD2	26.9252	26.9504	27.0596	26.8242	27.0115	26.9032	27.5311	27.5979	27.2995	27.3277	27.4869	27.4555	5.87899e-06	4.91451e-05	0.504072
Hsph1	Q61699	30.4314	30.428	30.3912	30.4364	30.4034	30.44	30.9454	30.9132	30.8454	31.015	30.9466	30.8844	2.17557e-09	1.77495e-07	0.503275
Lrrc59	Q922Q8	30.7083	30.6656	30.6849	30.7067	30.6087	30.6596	31.0702	31.1935	31.1375	31.2433	31.1564	31.2435	1.82188e-08	6.21856e-07	0.50177
Lhpp	Q9D7I5-2	24.839	25.914	25.2612	25.4464	25.2238	25.0657	25.5923	26.2745	25.4626	25.8008	25.9923	25.6196	0.027583	0.0573789	0.498672
Gspt1	Q8R050-2	29.3652	29.2937	29.3904	29.4833	29.3163	29.2855	29.9491	29.8959	29.8279	29.8626	29.8434	29.7461	2.77587e-07	4.23986e-06	0.498437
Sdhaf2	Q8C6I2	24.2597	23.9261	24.6289	23.9109	23.9694	24.2412	24.4622	24.7913	24.589	24.7181	24.4735	24.8833	0.00405056	0.0112628	0.496895
Txlna	Q6PAM1	24.0622	23.896	24.2321	23.8614	25.0394	23.7572	24.6615	24.843	24.4578	24.8113	24.8046	24.2499	0.0437575	0.0846552	0.49664
Cwc22	B1AYU4	25.5088	25.7478	25.9105	26.0565	25.781	25.2417	26.3479	25.9478	26.7382	26.3184	25.7757	26.0912	0.0221651	0.0475271	0.495469
Aatf	Q9JKX4-3	26.225	26.1362	25.9043	25.9757	26.0147	26.1587	26.5895	26.616	26.5662	26.4875	26.4836	26.642	5.69182e-06	4.79575e-05	0.495035
Mrto4	Q9D0I8	27.24	27.37	27.3113	27.1138	27.5341	27.3196	27.7987	27.9113	27.713	27.8848	27.6705	27.8779	3.40117e-05	0.000212653	0.494558
Prpf4b	Q61136	24.5236	24.7167	24.8257	24.6551	24.5356	23.8788	25.0181	24.9821	24.8644	25.1689	24.9838	25.0725	0.00629896	0.0164097	0.492377
Adprh	P54923	24.4018	24.2101	23.9131	24.4493	24.7325	24.1363	25.1554	24.8318	24.523	24.6918	24.8195	24.7635	0.00669198	0.0172855	0.49033
Srsf5	Q9D8S5	26.6706	26.4993	26.487	26.2075	26.408	26.4178	26.9837	26.9565	26.8572	26.9719	26.8934	26.9627	2.00053e-05	0.000135736	0.48921
Tra2a	E9QP00	26.0833	26.0603	26.2321	26.0977	26.2378	26.0504	26.5516	26.6664	26.4844	26.7266	26.7349	26.5307	5.44304e-06	4.63282e-05	0.488825
Rhoc	Q62159	24.4406	24.5677	24.5159	24.3887	24.0071	24.5056	24.8311	25.2476	24.7985	25.1592	24.9321	24.385	0.00877299	0.0218508	0.487949
Hsp90aa1	P07901	32.7954	32.8257	32.7929	32.7604	32.7033	32.7849	33.2941	33.2682	33.224	33.3012	33.3099	33.1909	3.84093e-09	2.33598e-07	0.487573
Eif1a	Q60872	24.8177	24.5718	24.7743	24.506	25.2901	24.8592	25.4328	25.1767	25.4608	25.2183	25.1778	25.2757	0.00286911	0.0084482	0.487156
Eif3e	P60229	28.489	28.5524	28.5723	28.5355	28.6319	28.4509	29.0124	28.831	29.036	29.2153	29.0882	28.9556	8.8589e-06	6.85698e-05	0.484441
Wdr43	Q6ZQL4	27.7774	27.7113	27.7405	27.8196	28.0275	28.0047	28.4254	28.3392	28.4987	28.2215	28.2795	28.2222	5.31863e-05	0.00030516	0.484216
Arhgef2	H3BJU7	27.7519	27.8071	27.7509	27.7242	27.494	27.6994	28.2701	28.1769	28.1544	28.2043	28.2324	28.093	2.70049e-06	2.59573e-05	0.483915
Fxr2	Q6P5B5	26.8827	26.7895	26.8963	26.1722	26.6846	26.8387	27.3186	27.2085	27.3388	27.2718	27.006	26.9952	0.00390656	0.0109534	0.479131
Lmnb2	P21619	26.4726	26.6914	26.4954	26.2742	26.1093	26.33	26.8382	26.8912	26.9076	26.5458	27.1532	26.9099	0.00189273	0.00591699	0.478839
Supt6	Q62383	24.5522	25.2056	24.639	24.7413	24.7151	24.7064	25.161	25.5561	25.2308	25.037	24.8378	25.6076	0.0108962	0.0261649	0.478443
Actb	P60710	35.2904	35.5516	35.4819	35.6079	35.5901	35.5379	35.8658	35.9562	36.0461	35.8676	36.0903	36.1006	2.27208e-05	0.000151396	0.477795
Usp15	Q8R5H1-5	26.3493	25.9259	26.2705	25.8841	26.3559	25.8798	26.698	26.6417	26.5578	26.5873	26.5926	26.4469	0.000930372	0.00328944	0.476497
Ncl	P09405	33.5883	33.5514	33.6662	33.5032	33.5556	33.5833	33.9988	34.0884	33.9954	34.1142	34.0676	34.0312	1.91932e-08	6.48497e-07	0.474588
Utp3	Q9JI13	25.9927	25.7209	25.8452	25.7399	25.9035	25.7688	26.3737	26.3564	26.1672	26.1376	26.382	26.3783	2.31059e-05	0.000153657	0.470698
Bop1	P97452	27.6966	27.5612	27.6075	27.5535	27.7136	27.8858	28.1981	28.1808	27.9841	28.2232	28.1421	28.1079	1.92674e-05	0.000131262	0.469682
Stxbp1	O08599	25.1537	25.2863	24.9033	25.1223	25.032	24.9486	25.3616	25.5636	25.4494	25.9468	25.512	25.421	0.00110501	0.00376586	0.468065
Hk2	O08528	29.1636	29.1757	29.2023	29.1151	28.9958	29.1401	29.4991	29.62	29.5899	29.6799	29.5991	29.5968	2.53426e-07	3.96126e-06	0.465375
Ktn1	A0A087WNW3	26.2931	26.1634	25.8431	25.6498	26.2514	26.0252	26.6745	26.4139	26.2447	26.6225	26.5217	26.5404	0.00314619	0.00917525	0.465279
Nol11	Q8BJW5-2	25.3896	25.3682	25.0745	25.1787	25.5104	25.5181	25.7219	25.8747	25.958	25.686	25.6103	25.9787	0.000690115	0.00257926	0.465033
Tubb6	Q922F4	28.0339	28.0363	28.0504	28.1162	28.1761	28.0869	28.4523	28.481	28.6291	28.3835	28.6943	28.6432	8.30313e-06	6.49246e-05	0.46394
Srsf7	Q8BL97-3	29.2668	29.1064	29.1709	29.0824	29.0517	29.2049	29.5943	29.7091	29.6906	29.2422	29.7173	29.7117	0.000232965	0.0010432	0.463644
Lyn	P25911-2	26.4685	26.5132	26.6199	26.4878	26.3773	26.5919	26.8588	26.969	26.961	27.0103	27.0496	26.9886	1.09467e-06	1.25831e-05	0.463088
Dusp12	F6ZTK6	23.164	22.6796	22.6962	22.4659	22.8624	22.4273	22.96	23.5268	22.9268	23.3915	23.0744	23.1862	0.010935	0.0262204	0.461745
Nop58	Q6DFW4	29.2484	29.3432	29.2119	29.2826	29.1454	29.1705	29.5087	29.6949	29.7247	29.6306	29.8007	29.8118	7.99699e-06	6.36903e-05	0.461514
Nop2	E9QN31	29.3861	29.3101	29.3948	29.3276	29.389	29.3504	29.7316	29.8547	29.8296	29.951	29.7452	29.8147	1.45288e-07	2.58504e-06	0.461484
Cpsf2	O35218	24.7462	25.3926	24.7866	25.3893	25.0457	24.9574	26.1838	25.7019	25.443	25.0257	25.4418	25.2858	0.0430885	0.0834574	0.460698
Sec24b	Q80ZX0	25.0438	25.0525	24.7022	24.848	25.3828	24.9915	25.4704	25.4638	25.5324	25.4897	25.5209	25.3073	0.000928083	0.00328512	0.460595
Atp5d	Q9D3D9	28.9113	28.9511	28.8443	28.6308	28.9269	28.9515	29.4207	29.2941	29.2419	29.1204	29.4803	29.4085	0.000106643	0.000542127	0.458313
Nup88	Q8CEC0-3	26.245	26.1234	26.3471	25.89	26.0025	26.3301	26.8548	26.6759	26.5458	26.5161	26.4579	26.6192	0.000730076	0.00268954	0.455284
Nono	Q99K48	29.8314	29.8718	29.8534	29.8538	29.647	29.6791	30.2887	30.2339	30.2287	30.0543	30.2875	30.3737	1.74803e-05	0.000120809	0.455025
Smg9	Q9DB90	22.5196	22.0498	21.66	22.1888	21.6595	21.5297	22.4061	22.4802	22.3083	22.3544	22.5143	22.2738	0.0181349	0.0401463	0.454955
Iars	Q8BU30	29.958	29.752	29.941	29.8298	29.9053	29.9607	30.3442	30.3298	30.3021	30.3917	30.371	30.32	2.35052e-07	3.78368e-06	0.452037
Nol10	Q5RJG1	25.7558	25.7168	25.7875	25.7348	26.0518	25.9304	26.2098	26.3585	26.0745	26.2053	26.3434	26.4874	0.000229505	0.00102908	0.450292
Rbm25	B2RY56	27.5464	27.5233	27.5614	27.4473	27.4144	27.5027	27.9424	27.9685	27.8047	28.1347	27.9478	27.8802	4.93613e-06	4.31884e-05	0.44711
Emc2	Q9CRD2	24.9215	24.9299	24.9996	24.8423	24.818	24.3366	25.287	25.1149	25.1365	25.3739	25.2037	25.4061	0.00230015	0.00697552	0.445705
Stk3	Q9JI10-2	24.7296	24.3962	24.5689	24.3276	24.5078	24.6416	24.7911	24.7685	25.105	25.036	25.0058	25.1362	0.000531902	0.00209073	0.445141
Scfd1	Q8BRF7	26.4697	26.3261	26.5651	26.431	26.3824	26.7095	27.0765	26.8795	26.8385	27.0338	26.9271	26.7902	0.000114271	0.000573069	0.443628
Larp1	Z4YJT3	27.6218	27.3378	27.4406	27.3094	27.6674	27.5889	28.246	27.9581	27.8032	27.9488	27.8182	27.8499	0.000691985	0.00258006	0.443061
Ftsj3	Q9DBE9	27.6579	27.2031	27.4993	27.4073	27.5028	27.278	27.6788	27.8663	27.7781	28.1108	27.936	27.8348	0.000629031	0.0024047	0.442734
Zfp207	Q9JMD0-4	25.5854	25.9855	25.3818	25.6095	25.5494	25.6762	25.9021	26.2157	26.3163	26.2591	25.683	26.0646	0.00629182	0.0164039	0.442191
Zc3hav1	D3Z5I1	26.2635	25.9932	26.2755	26.259	26.7698	26.2866	26.3377	27.048	26.6288	27.1968	26.7405	26.5486	0.024103	0.0509028	0.442136
Hmga1	P17095	29.6152	29.5307	29.4176	29.0421	28.8897	29.3534	29.7302	29.8891	29.7242	29.6383	29.7686	29.7376	0.00450773	0.0122588	0.439861
Hmga1	P17095-1	26.8928	26.9313	26.5327	26.4018	26.2512	26.3734	26.9714	26.9426	26.8147	27.0276	26.8143	27.1126	0.0122743	0.0122588	0.439861
Rbm39	Q8VH51-2	27.8347	27.9348	27.9263	27.8941	28.0347	27.9255	28.3676	28.48	28.3849	28.2544	28.4101	28.2912	1.20302e-06	1.35949e-05	0.439688
Rpl36	Q6ZWZ4	28.251	28.6336	28.6217	28.864	28.5621	28.5658	29.1274	28.8469	29.2281	28.3294	29.3004	29.3007	0.0305589	0.062291	0.439095
Pak1ip1	Q9DCE5	26.4219	26.3424	26.3707	26.2878	26.2296	26.1295	26.6112	27.0373	26.5946	26.7039	26.8311	26.6381	0.000321949	0.00137013	0.439054
Mat2a	Q3THS6	28.5095	28.5032	28.6989	28.3701	28.2875	28.5065	28.8013	28.9102	28.9688	28.9523	28.8642	29.0035	5.17849e-05	0.000299381	0.437408
Hnrnpa1	Q5EBP8	31.1137	31.0227	31.2201	31.07	31.0251	30.9849	31.3624	31.5811	31.4909	31.5415	31.4837	31.5856	4.25295e-06	3.81397e-05	0.434796
Nup50	Q9JIH2	26.8535	26.7638	26.6335	26.7521	26.6487	26.7739	27.4759	27.2012	27.0699	26.9439	27.1971	27.1425	0.000287646	0.00124473	0.434145
Eif3i	Q9QZD9	29.4234	29.4304	29.4583	29.4196	29.4147	29.4073	29.7868	29.768	29.8321	30.0314	29.9034	29.8334	7.6709e-07	9.61017e-06	0.433582
Faf2	Q3TDN2	24.5291	24.2023	24.2118	24.3553	24.6134	24.405	24.9063	24.8975	25.0666	24.675	24.5874	24.7845	0.0012903	0.00425645	0.433415
Bola2	Q8BGS2	28.2941	28.1963	28.2305	28.0653	27.9162	28.1442	28.4998	28.6553	28.493	28.7153	28.6008	28.4802	8.22866e-05	0.000439338	0.432954
Sec23ip	G3X928	27.1568	26.8241	26.7637	27.0017	26.9189	26.6529	27.2119	27.2934	27.435	27.3151	27.3043	27.355	0.00027455	0.00119424	0.432757
Arap1	Q4LDD4-3	24.984	24.6938	24.5156	24.0641	25.0648	24.6528	25.0183	25.063	25.0172	24.7209	25.6199	25.129	0.0455668	0.0876485	0.432239
Ythdf1	A2AWN8	26.4229	26.6249	26.2709	26.4386	25.9532	26.21	26.7733	26.8083	26.5006	26.7671	26.7812	26.8832	0.00255415	0.00761465	0.432203
2700060E02Rik	Q9CQE8	28.1036	28.0094	28.0061	28.1328	28.1458	28.1732	28.4569	28.4347	28.5654	28.5928	28.6344	28.4761	2.00734e-06	2.03471e-05	0.431565
Ogfr	Q99PG2-2	26.3097	26.2123	26.5292	26.3097	26.4423	26.4701	26.6409	26.9725	26.7858	27.0813	26.7884	26.5885	0.000830746	0.00299445	0.430681
H2afv	Q3THW5	29.7161	29.7911	29.462	29.4228	28.6824	29.2825	30.1465	29.7259	30.005	29.5792	29.6469	29.8304	0.0423789	0.0822735	0.429492
Tor1aip1	Q921T2-3	26.7967	27.0731	27.0216	26.796	27.1421	27.0191	27.1135	27.542	27.3798	27.6072	27.4176	27.3623	0.000876061	0.00313542	0.428969
Ddx3y	Q62095	27.2389	27.1746	27.2757	27.1623	27.0898	27.1121	27.7092	27.5439	27.4875	27.584	27.6939	27.6039	2.81281e-06	2.68058e-05	0.428173
Slc2a6	A2AR26	24.2253	23.9369	24.6495	24.3717	24.2497	24.1957	24.8963	24.8688	24.5139	24.5492	24.7413	24.6281	0.00419909	0.0115795	0.428138
Cdc73	Q8JZM7	25.1317	25.3978	25.8218	25.559	25.4396	25.4153	25.7779	26.0258	25.8701	25.8559	25.9431	25.851	0.00150234	0.00484596	0.426415
Mthfd2	P18155	27.5425	27.3899	27.6871	27.5904	27.6581	27.7475	28.1542	27.8363	28.0054	27.8352	28.0599	28.2822	0.000718936	0.00265798	0.426286
Por	P37040	29.6888	29.7582	29.7902	29.8123	29.7537	29.7178	30.1606	30.221	30.0333	30.1783	30.2163	30.2596	4.65482e-07	6.3038e-06	0.424684
Ddx3x	Q62167	30.8024	30.6557	30.7573	30.7162	30.632	30.6538	31.1462	31.1325	31.0669	31.1751	31.1143	31.1276	8.93865e-08	1.85713e-06	0.424217
Hspa8	P63017	34.2811	34.2863	34.2965	34.2598	34.2336	34.2299	34.631	34.6986	34.6004	34.7566	34.7571	34.6696	4.36911e-08	1.12421e-06	0.42099
Ranbp2	Q9ERU9	29.6688	29.5132	29.6904	29.4921	29.5363	29.5486	29.9653	30.137	29.9114	30.1389	29.9147	29.9058	2.44236e-05	0.00016019	0.420622
Pcbp2	Q61990	29.7201	29.678	29.6739	29.6718	29.8024	29.9011	30.1708	30.1829	30.0565	30.2925	30.1871	30.0771	9.98537e-06	7.64327e-05	0.419953
Pcbp2	Q61990-2	25.5684	25.8012	24.4795	24.7749	22.3033	24.8863	26.3014	26.6146	26.1518	26.0777	26.3767	26.3872	0.00847004	7.64327e-05	0.419953
Srrm2	Q8BTI8-3	28.7633	28.787	28.7561	28.6687	28.7252	28.7019	29.1652	29.1414	29.0829	29.1779	29.1744	29.1788	6.26238e-09	3.10918e-07	0.419718
Eif2a	Q8BJW6	27.6235	27.6577	27.6478	27.6385	27.6896	27.5777	28.0079	28.0199	27.9726	28.169	28.1389	28.0436	3.16281e-07	4.66061e-06	0.419531
Vim	P20152	34.1584	34.1793	34.3125	34.1301	34.1875	34.1924	34.573	34.629	34.5736	34.5373	34.6715	34.6914	3.63684e-07	5.1767e-06	0.419255
Orc2	Q59IX1	21.0552	20.9543	20.6107	21.5463	21.0747	21.5578	21.3729	21.2579	22.0036	21.5762	21.472	21.6251	0.0450217	0.0867498	0.418141
Hectd1	F8WIE5	26.6564	25.5555	26.3751	26.4595	26.5678	26.3855	26.5345	26.7799	26.661	26.8298	26.9737	26.7285	0.0362309	0.0723106	0.41795
Polr1c	D3Z3D6	25.2394	25.187	25.2509	25.2494	25.3982	25.2407	25.7698	25.471	25.8177	25.7529	25.6765	25.5844	4.28779e-05	0.000256577	0.417802
Lig3	Q3UC82	24.8176	24.8223	24.6393	24.6894	25.0277	24.8432	25.218	25.2346	25.5142	25.0684	25.0778	25.2324	0.000670288	0.00252704	0.417647
Wdr12	Q9JJA4	27.8992	28.0023	28.0717	27.8147	28.0901	27.762	28.2446	28.4151	28.3991	28.4257	28.4121	28.245	8.76588e-05	0.000461035	0.416936
Arcn1	Q5XJY5	28.8778	28.6582	28.7107	28.7309	28.7939	28.7693	29.1768	29.1944	29.1503	29.188	29.2509	29.0752	8.71276e-07	1.05214e-05	0.415812
Kpna3	O35344	28.0584	28.0177	27.9683	28.091	28.0714	28.089	28.5279	28.5845	28.3995	28.5468	28.3889	28.3332	4.22185e-06	3.79626e-05	0.414167
Abcf1	Q6P542	29.0119	28.9068	28.8926	28.803	29.0743	29.1315	29.4077	29.3203	29.3924	29.3592	29.4573	29.3671	1.71483e-05	0.00011876	0.413946
Srrt	Q99MR6-3	28.6697	28.848	28.8175	28.6812	28.7202	28.8182	29.1197	29.2093	29.0752	29.2664	29.2127	29.1388	2.40353e-06	2.36465e-05	0.411216
Tubb4b	P68372	32.822	33.0671	33.0964	33.0368	33.1054	33.0097	33.3282	33.3847	33.4169	33.3631	33.6446	33.4655	6.73195e-05	0.000372204	0.410943
Mettl16	Q5SW15	25.4379	25.3911	25.4172	25.2198	25.4148	25.4952	25.6233	25.7745	25.8102	25.9627	25.9499	25.7052	0.000111675	0.00056343	0.40833
Rbm28	Q8CGC6	27.2631	26.8778	27.1614	27.0266	27.0235	27.0915	27.4505	27.4667	27.4127	27.5553	27.5028	27.4966	3.37684e-05	0.000211527	0.40675
Pdxdc1	Q99K01-2	25.798	25.6402	25.9521	25.9395	26.3317	26.184	26.359	26.3213	26.4166	26.3304	26.3773	26.4722	0.00321311	0.00932974	0.405191
Dbnl	Q62418-3	26.7848	26.7257	26.7095	26.8137	26.7662	26.6984	27.0558	27.1794	27.1055	27.1713	27.16	27.2535	2.61685e-07	4.05248e-06	0.404511
Tpr	Q7M739	29.5359	29.4733	29.4575	29.3678	29.4185	29.4838	29.6479	29.7155	29.5763	29.6744	29.6138	29.6091	0.000157331	0.117882	0.404034
Smu1	Q3UKJ7	28.0288	27.8136	28.0393	27.9648	28.1197	28.1144	28.3216	28.533	28.3172	28.4664	28.513	28.3454	6.62019e-05	0.000367849	0.402668
LOC100862468	Q9D0T1	29.2369	29.1989	29.2117	29.0979	28.9733	29.1653	29.5779	29.6787	29.4467	29.4838	29.5966	29.5101	1.86453e-05	0.000127543	0.401598
Impdh2	P24547	30.3983	30.3686	30.4827	30.2755	30.3583	30.4119	30.7769	30.7438	30.751	30.8847	30.8207	30.7218	7.99236e-07	9.86511e-06	0.400615
Gmps	Q3THK7	28.1114	28.0318	27.6897	27.9906	28.0771	27.9492	28.5306	28.4014	28.3589	28.2448	28.4205	28.2944	0.000305302	0.0013076	0.400125
Flna	B7FAU9	31.2252	31.1453	31.2527	31.1256	31.1399	31.1673	31.4724	31.6157	31.4971	31.7575	31.5855	31.5257	7.33513e-06	5.89808e-05	0.399659
Idh3a	Q9D6R2	29.3658	29.4635	29.2741	29.5595	29.4446	29.4774	30.0162	29.7931	29.9835	29.3607	29.8818	29.9464	0.00393509	0.0110137	0.399482
Hnrnpf	Q9Z2X1	31.1176	31.2821	31.2011	31.2547	31.1138	31.2642	31.4694	31.6592	31.6112	31.5622	31.7053	31.6164	4.98377e-06	4.31884e-05	0.398393
Dhx15	O35286	29.5424	29.5603	29.5951	29.4544	29.5945	29.5295	29.7982	29.9574	29.9408	30.0376	30.0081	29.921	1.75487e-06	1.81174e-05	0.397803
Rpl19	A2A547	30.3083	30.1927	30.1673	30.1077	29.9387	30.0095	30.7533	30.4271	30.4788	30.3221	30.5706	30.5575	0.000607755	0.00234376	0.397509
Ywhag	P61982	31.1257	31.0894	31.0214	31.1424	30.8812	31.0708	31.4996	31.4586	31.4625	31.3943	31.4609	31.4324	2.416e-06	2.36994e-05	0.396224
Rab35	Q6PHN9	26.2295	26.4149	26.1658	26.3009	25.7226	25.9387	26.7482	26.3454	26.6443	26.1826	26.5147	26.711	0.0168369	0.0375964	0.395616
Impdh1	F7DEU6	26.4131	26.4011	26.3773	26.0457	26.3815	26.4508	26.8449	26.6773	26.7009	26.7192	26.7339	26.7615	0.000126055	0.000619168	0.394738
Nap1l1	E9PW66	29.7265	29.4986	29.5333	29.615	29.6674	29.7261	30.1864	30.0142	30.0068	30.0892	29.9855	29.8467	7.05252e-05	0.000384213	0.393634
Surf6	P70279	25.2075	25.0129	25.1548	25.1449	25.2086	25.4447	25.8623	25.6229	25.3067	25.559	25.6064	25.5706	0.00171754	0.00544051	0.39242
Preb	Q9WUQ2	25.5848	26.3839	26.1654	26.1296	25.9268	25.9873	26.7791	26.3024	26.4662	25.8959	26.6512	26.418	0.0420697	0.0818159	0.389187
Lman1	Q9D0F3	27.3899	27.4692	27.3425	27.3605	27.4078	27.5793	27.8036	27.7309	27.7627	27.8486	27.8415	27.883	3.86446e-06	3.55127e-05	0.386866
Pgam1	Q9DBJ1	32.2413	32.3687	32.3365	32.488	32.4476	32.4358	32.9715	32.6682	32.8013	32.6052	32.8893	32.7004	0.000202037	0.000927044	0.38637
Hint1	P70349	29.7591	29.6321	29.7747	29.5392	29.6996	29.7262	30.0477	30.0673	30.0901	30.0812	30.216	29.9376	2.09677e-05	0.000141691	0.384807
Rab1b	Q9D1G1	26.3377	26.8393	26.4604	26.9905	26.7809	26.6873	27.4816	26.9136	27.1194	26.562	27.0694	27.2539	0.0390863	0.0769532	0.383989
Fkbp4	P30416	30.1778	30.1579	30.2195	30.0259	30.0177	30.1181	30.5889	30.4277	30.4219	30.614	30.5266	30.4341	1.3836e-05	9.95298e-05	0.382738
Eif4a3	Q91VC3	29.5141	29.4833	29.459	29.4383	29.5127	29.4779	29.7774	29.8248	29.857	29.9106	29.9468	29.8581	7.16894e-08	1.57764e-06	0.381604
Myo18a	E9Q405	24.8961	25.0622	24.7174	24.8287	25.6009	24.8548	25.3875	25.5321	25.3088	25.5663	25.5013	24.9479	0.0388726	0.0767132	0.380647
Khdrbs1	Q60749	28.4654	28.448	28.427	28.6221	28.7113	28.739	28.8632	28.9236	28.8992	29.1439	28.9162	28.9466	0.000289901	0.00124964	0.380012
Usp4	A0A0A6YW28	26.5645	26.4708	26.4958	26.5621	26.6454	26.5462	27.16	26.9513	26.9334	26.7553	27.0158	26.7482	0.000260371	0.00114447	0.379872
Ddx5	Q8BTS0	31.4667	31.3641	31.5299	31.4794	31.4513	31.4344	31.7667	31.8585	31.8036	31.8941	31.8322	31.8443	1.2072e-07	2.26859e-06	0.378959
Kctd12	Q6WVG3	26.2122	26.2	26.2971	26.3294	26.3818	25.9491	26.522	26.6141	26.7393	26.5512	26.4478	26.7624	0.000857102	0.0030828	0.377874
Fkbp5	Q64378	26.5183	25.7519	26.513	26.3519	26.0477	25.9516	26.6509	26.5976	26.7866	26.5292	26.3648	26.4723	0.02477	0.0520777	0.377815
Emd	O08579	25.6149	25.6079	25.3251	25.3674	25.1557	25.1237	25.868	26.0726	25.5467	25.6459	25.6654	25.6585	0.00912188	0.0226355	0.377055
Map2k2	Q91YS7	24.7818	24.9437	24.6155	24.7585	24.5713	24.4704	24.8276	24.986	24.9505	25.3497	25.2702	25.0084	0.00585485	0.0154696	0.375198
Hdac1	O09106	27.5937	27.5442	27.3283	27.7449	27.3674	27.2986	27.7382	27.8211	27.9209	27.6976	28.0196	27.9297	0.00166243	0.00528596	0.374975
Eef2	P58252	33.4063	33.4282	33.3593	33.3852	33.4124	33.427	33.7525	33.7364	33.8116	33.7876	33.8351	33.7448	3.27254e-09	2.16368e-07	0.374957
Utp6	Q8VCY6	25.0554	24.6862	24.8036	24.6241	24.9656	24.9862	25.2617	25.4223	25.2006	25.3835	25.0156	25.0845	0.00320162	0.00931254	0.37452
Gart	Q64737	30.432	30.2764	30.3715	30.3534	30.3476	30.4323	30.7113	30.7183	30.7319	30.82	30.7777	30.6974	2.51106e-07	3.95736e-06	0.373892
Mybbp1a	Q7TPV4	31.2266	31.2609	31.2582	31.3621	31.3657	31.2431	31.6525	31.7032	31.7332	31.6268	31.6069	31.6333	3.88508e-07	5.48337e-06	0.373182
Pgam5	Q8BX10-2	25.6676	25.6011	25.3176	25.2972	25.17	25.4046	25.6766	25.8141	25.7833	26.027	25.7096	25.6689	0.00301757	0.00882323	0.370211
Ckap5	Z4YL78	26.49	26.5491	26.4055	26.4791	26.0902	26.4682	26.9827	26.7317	26.7438	26.9098	26.6455	26.6875	0.0016169	0.00515589	0.369833
Gipc2	Q9Z2H7	24.0655	23.3553	23.6407	23.8654	24.0439	23.9845	24.2918	24.4162	24.327	24.0844	24.1272	23.9271	0.02133	0.0461804	0.369731
Dock10	A0A087WRP5	25.9286	25.7639	25.9366	25.7527	25.7958	26.013	26.3471	26.2299	25.9695	26.5362	26.2885	26.0344	0.00320466	0.00931329	0.369178
Copg1	Q9QZE5	28.4959	28.3746	28.4114	28.4499	28.5359	28.4566	28.7689	28.7756	28.8412	28.9245	28.8315	28.7775	7.89669e-07	9.81949e-06	0.365785
Dis3	Q9CSH3	26.5534	26.8029	26.7094	26.6287	26.4539	26.7292	27.247	26.9277	27.0104	27.0059	26.9692	26.9083	0.000492598	0.00195926	0.365167
Top2a	Q01320	28.5749	28.4504	28.5632	28.4473	28.5379	28.4705	28.8648	28.9509	28.8811	28.9754	28.7802	28.7775	4.9807e-06	4.31884e-05	0.364301
Ube2q1	Q7TSS2	24.7739	24.7501	24.9208	24.9465	24.7044	24.7945	25.3007	25.2005	25.1529	25.1784	25.0949	25.1473	2.10962e-05	0.000142272	0.364074
Psmd14	O35593	27.3935	27.9422	27.8731	28.0263	27.9489	27.8856	28.1463	28.0544	28.3207	28.0603	28.3404	28.3271	0.00738667	0.0188183	0.363254
Dnajc17	Q91WT4	21.5154	21.5037	21.0687	21.0748	21.3655	21.2395	22.0475	21.61	21.7146	21.3977	21.5991	21.5723	0.0132042	0.0306297	0.362275
Pnpt1	Q8K1R3	27.3464	27.3081	27.2924	27.1224	27.0509	27.2112	27.4751	27.6149	27.6181	27.7158	27.4724	27.5893	0.00015009	0.00071927	0.359045
Ahsa1	Q8BK64	29.207	29.2143	29.2323	29.3147	29.2187	29.2777	29.5418	29.6409	29.5242	29.6804	29.6633	29.5681	6.07173e-07	7.78159e-06	0.358977
Gls	D3Z7P3-2	28.444	28.2846	28.4425	28.6565	28.4125	28.3491	28.166	28.2856	28.2279	28.1923	27.8649	28.2852	0.00992365	0.284777	0.358828
Hnrnpc	Q9Z204	31.0935	31.0285	31.1069	30.982	31.0076	30.9854	31.307	31.4389	31.3745	31.4324	31.3783	31.4256	3.19134e-07	4.68204e-06	0.358799
Psmc3	O88685	28.9342	28.9873	29.0346	29.0852	29.1288	28.9867	29.3797	29.3089	29.3592	29.393	29.4837	29.381	2.34829e-06	2.31712e-05	0.358118
Sf3a3	Q9D554	27.6875	27.8048	27.3975	27.7247	27.4983	27.5715	27.9665	28.0471	27.9746	27.8209	27.9795	28.0418	0.000487786	0.00194243	0.357711
Acsl3	E9PUC2	25.2628	25.3975	25.4065	25.2383	24.9037	25.0929	25.6603	25.7715	25.6695	25.6018	25.3416	25.4022	0.00635701	0.0165223	0.357508
Ppan	Q91YU8	25.7937	25.8542	26.0731	25.7483	25.9702	25.9042	26.3837	26.2485	25.7862	26.2575	26.4574	26.3538	0.0084021	0.0211475	0.357244
Lrriq1	Q0P5X1	27.3089	27.0051	27.1683	27.0576	26.6433	27.1762	26.9349	27.3228	27.5084	27.3886	27.4563	27.8825	0.0460628	0.0885009	0.3557
Snd1	Q78PY7	31.1295	31.1141	31.2028	31.0389	31.0936	31.1651	31.5224	31.4657	31.4432	31.5208	31.4995	31.4212	2.35278e-07	3.78368e-06	0.354791
Ncf1	F8WH69	27.002	27.2029	27.277	27.0269	26.9385	27.0239	27.3443	27.5436	27.3598	27.5429	27.439	27.3678	0.000289295	0.00124863	0.354347
Ptpn23	Q6PB44-2	24.4645	24.6638	24.4105	24.8247	24.552	24.412	25.1046	25.0421	24.6903	24.908	24.7733	24.9273	0.00339018	0.00975735	0.353025
Tomm70a	Q9CZW5	28.4543	28.3557	28.3538	28.3274	28.3221	28.3895	28.7197	28.7002	28.8133	28.563	28.7323	28.7872	6.29466e-06	5.18612e-05	0.352152
Apbb1ip	Q8R5A3	26.6188	26.7024	26.9538	26.7019	26.7723	26.8809	27.2252	27.2843	27.0052	27.2322	27.0429	26.9508	0.00100082	0.00347997	0.351765
Emg1	O35130	27.4199	27.2891	27.2512	27.2147	27.4042	27.2355	27.4591	27.7475	27.6608	27.705	27.6994	27.6529	7.82325e-05	0.000420373	0.351684
Pop1	Q9D4G5	25.5855	25.3901	25.6638	25.4951	25.3808	25.2278	26.3822	25.5068	25.8512	25.5741	25.8904	25.6284	0.0382488	0.0757056	0.348311
Slc1a5	Q9ESU7	25.5799	25.7739	25.3992	25.4456	25.5211	25.3334	25.6119	26.0225	25.6795	26.0086	25.8685	25.9388	0.00452659	0.0122901	0.346107
Sfpq	Q8VIJ6	30.7037	30.7328	30.7039	30.648	30.6336	30.7116	30.9388	31.1676	31.0348	30.9187	31.0483	31.0915	8.30724e-06	6.49246e-05	0.344366
Stambpl1	Q76N33	24.3209	24.0309	24.1361	24.2546	23.6664	24.3703	24.6148	24.3975	24.6688	24.2301	24.5416	24.3821	0.0209903	0.045504	0.342609
Slc7a5	Q9Z127	25.8417	25.9585	26.1068	25.9372	25.9669	25.9588	26.1205	26.3869	26.291	26.3727	26.3213	26.3307	6.68909e-05	0.000370447	0.342216
Fasn	P19096	31.5938	31.509	31.571	31.5451	31.5437	31.571	31.8978	31.8944	31.8652	31.9513	31.9185	31.8573	4.84221e-09	2.70892e-07	0.341808
Lgals3bp	Q07797	27.2662	26.8373	26.8509	27.1513	27.0621	27.117	27.0788	27.6933	27.2957	27.4637	27.4499	27.3543	0.0104365	0.0252606	0.341797
Edc4	G5E896	26.7984	26.9068	26.8706	26.8579	26.7792	26.8838	27.4222	27.4134	26.9736	27.1106	27.2034	27.02	0.00185193	0.00581792	0.3411
Umps	P13439	28.5728	28.4761	28.5287	28.5953	28.5448	28.5798	28.8529	28.8206	28.7709	29.1193	28.9482	28.8259	9.96523e-05	0.000515204	0.340039
Ddx1	Q91VR5	29.303	29.2615	29.2874	29.1899	29.2884	29.2685	29.6283	29.622	29.5032	29.6437	29.6457	29.5903	2.27448e-07	3.69326e-06	0.339103
Hnrnph1	Q8C2Q7	29.826	29.7684	29.8811	29.6861	29.7955	29.8424	30.1421	30.1852	30.0185	30.102	30.2535	30.1314	1.21917e-05	9.00248e-05	0.338848
Lrwd1	Q8BUI3	23.7546	24.2052	24.0121	23.8817	23.6364	23.9475	23.9715	24.4319	24.1396	24.3058	24.411	24.2073	0.0108411	0.02607	0.338264
Rpf2	Q9JJ80	26.5304	26.4017	26.8192	26.9978	27.3155	26.8032	27.1306	27.1621	27.1579	26.9955	27.2332	27.218	0.0342631	0.0687111	0.338244
Srsf1	H7BX95	28.7406	28.7486	28.8531	28.5418	28.6374	28.8414	29.2106	29.0746	29.0942	28.8595	28.9863	29.1664	0.000794381	0.00287888	0.338153
Tfrc	Q62351	29.6468	29.5384	29.5666	29.6928	29.6457	29.6564	29.8271	29.9654	29.9542	30.0359	30.0334	29.9581	6.17631e-06	5.1138e-05	0.337912
Gapvd1	Q6PAR5-5	26.577	26.1585	26.6607	26.7167	26.7547	26.664	26.8112	27.0165	26.8921	27.0313	26.8553	26.9512	0.00572673	0.0152152	0.337649
Morc3	F7BJB9	23.9545	24.4304	24.2257	24.0663	24.1258	24.2886	24.3357	24.1358	24.5449	24.7506	24.5798	24.7605	0.0196416	0.0430262	0.33599
Npm3	Q9CPP0	27.6699	27.7501	27.8383	27.8636	28.0327	27.7469	28.002	28.1277	28.1566	28.0105	28.3313	28.286	0.00131123	0.00431275	0.335423
Rpl32	P62911	30.5464	30.5815	30.4989	30.55	30.4219	30.5096	30.9622	30.7884	30.7773	30.7203	30.9892	30.8715	5.23045e-05	0.000301107	0.333417
Tigar	Q8BZA9	26.5562	26.4309	26.6747	26.7812	26.689	26.6559	27.0295	26.8761	26.7786	27.2108	26.978	26.913	0.00168985	0.00536294	0.333003
Hdlbp	Q8VDJ3	29.0085	28.9223	29.1027	28.9875	28.9375	28.9737	29.2561	29.3868	29.1685	29.4503	29.3701	29.2949	4.90129e-05	0.000286623	0.332414
Ddx18	Q8K363	27.4481	27.4089	27.1042	27.6155	27.8193	27.4024	27.909	27.9251	27.967	27.3431	27.819	27.8233	0.0345314	0.0691662	0.331327
Tardbp	Q921F2	30.2218	30.2679	30.2012	30.2052	30.2812	30.2701	30.5438	30.5985	30.5425	30.5147	30.6096	30.6217	5.39365e-08	1.2887e-06	0.330552
Yme1l1	O88967	25.548	25.2829	25.4222	25.4598	24.7607	25.4889	25.6091	25.6477	25.4224	25.5635	25.9951	25.702	0.0429932	0.0833694	0.329547
Cd86	P42082-2	25.0466	24.6997	24.6777	24.9011	24.5568	24.9218	25.2591	24.9311	25.1611	25.1981	25.0298	25.2013	0.00460649	0.0124767	0.329459
Ubap2	A2AMY5	25.7051	26.1837	25.6239	25.861	25.8391	25.8629	25.9772	25.8435	26.3135	26.1777	26.3953	26.3428	0.0203777	0.0444222	0.32908
Nop9	Q8BMC4	27.2324	27.1547	26.9718	27.0156	27.0563	26.9679	27.3547	27.5098	27.3831	27.5045	27.309	27.3101	0.00018656	0.000866725	0.328738
Smarcc1	Q3UNN4	27.1296	27.3723	27.3219	27.693	27.0758	27.2335	27.8365	27.5665	27.7663	27.1909	27.6523	27.7824	0.032575	0.0661186	0.328141
Cct2	P80314	31.4078	31.4038	31.5122	31.4285	31.4752	31.388	31.7456	31.7132	31.7948	31.7705	31.8089	31.7499	9.47794e-08	1.92144e-06	0.327888
Wdr3	Q8BHB4	27.2255	26.9803	27.0307	27.1034	27.0266	27.185	27.5229	27.4551	27.2999	27.6172	27.3026	27.3204	0.000652126	0.00247882	0.327765
Eif3g	Q9Z1D1	29.4506	29.2137	29.151	29.1919	29.2445	29.2059	29.5284	29.5765	29.5024	29.6897	29.6448	29.4784	0.000143723	0.000694732	0.32711
Bud31	E0CX20	26.3747	26.1225	26.3275	25.9742	26.4	26.4658	26.5485	26.7405	26.5853	26.6883	26.4838	26.5745	0.00358688	0.0102112	0.326033
Ddx19a	Q61655	28.2034	28.0804	28.0908	28.1439	27.9414	28.065	28.5462	28.4395	28.2194	28.3542	28.4623	28.4561	0.000235022	0.0010496	0.325486
Gm3839	S4R1W1	23.992	23.8844	23.8046	23.5045	23.5369	23.7195	24.5231	24.0182	23.8947	24.1384	24.0455	23.7743	0.0326206	0.0661709	0.32538
Gm17669	F6QL70	29.7833	29.7154	29.6097	29.6188	29.1811	29.6411	29.9008	29.772	29.8519	29.999	29.9538	30.0174	0.00641832	0.0166558	0.324239
Smc1a	Q9CU62	27.479	27.5101	27.9808	27.8288	27.9284	27.6462	28.0915	28.0164	28.0205	28.0219	28.0874	28.0781	0.00452014	0.0122826	0.323763
Pcbp1	P60335	31.1771	31.2356	31.2561	31.1948	31.1082	31.2676	31.4599	31.5185	31.6511	31.4733	31.5793	31.4943	7.6677e-06	6.12135e-05	0.322846
Pxn	F8VQ28	24.8531	25.0258	25.0423	25.2523	24.9962	24.6501	25.5093	25.1155	25.5491	25.0724	25.3516	25.1524	0.0216459	0.0466996	0.321746
Nop56	Q9D6Z1	29.8591	29.7416	29.8663	29.8951	29.9431	29.8828	30.0312	30.2598	30.1523	30.3172	30.2085	30.1489	6.43231e-05	0.0003592	0.32165
Eif3b	Q8JZQ9	30.2372	30.1933	30.2556	30.1758	30.0556	30.2338	30.3996	30.5327	30.5024	30.6372	30.5732	30.4298	4.55195e-05	0.000268541	0.320598
Nup43	P59235	25.4317	25.6912	25.5194	25.5982	25.5902	25.4685	25.8764	25.8627	25.8368	25.8477	25.8425	25.9549	2.12482e-05	0.000142722	0.320316
Eif4g1	E9Q9E1	30.2996	30.347	30.299	30.2318	30.2285	30.1738	30.6384	30.5229	30.5673	30.6692	30.635	30.4644	1.54442e-05	0.000109451	0.319599
Qars	Q8BML9	29.1481	29.0527	29.3283	29.1736	29.1452	29.162	29.5161	29.4654	29.3718	29.6735	29.4903	29.4068	0.000213731	0.000974018	0.319002
Sssca1	P56873	27.3104	27.1317	26.9527	26.9434	27.0074	27.1796	27.7652	27.605	27.2747	27.1626	27.246	27.3757	0.0178448	0.0396091	0.317322
Senp3	Q9EP97	25.2298	25.4245	24.7286	24.7962	24.8956	25.1721	25.6087	25.1622	25.1179	25.5434	25.2594	25.4574	0.0475374	0.090727	0.317013
Srp54a	P14576	27.4028	27.2395	27.3067	27.2148	27.3458	27.1323	27.4651	27.4338	27.6269	27.8208	27.6407	27.5545	0.00107733	0.00369988	0.316637
Fip1l1	D3Z619	25.4461	25.8787	25.7126	25.8163	25.6109	25.7104	25.9724	26.115	25.9944	26.1152	26.0391	25.8366	0.00192303	0.00600051	0.316244
Ralb	Q9JIW9	26.6638	26.7817	26.7299	26.8376	26.7567	26.7032	27.0133	27.1017	26.9911	26.9763	27.1529	27.1289	1.30398e-05	9.50283e-05	0.315194
Zc3h11a	Q6NZF1	26.2445	26.4836	26.6952	26.4741	26.5712	26.3931	26.8453	26.8011	26.7348	26.8742	26.7102	26.7776	0.000933237	0.00328944	0.31355
Dnajc3	Q91YW3	26.6834	26.6055	26.8201	26.8038	26.8388	26.9335	27.0022	27.1477	27.0183	27.0906	27.1437	27.1625	0.000220814	0.0010022	0.313332
Swap70	Q6A028	26.9988	26.9636	27.0726	27.0188	26.9636	26.9722	27.2457	27.393	27.0796	27.4904	27.4601	27.1974	0.00103549	0.00358562	0.312772
Psmd2	Q8VDM4	30.2636	30.1419	30.2548	30.2469	30.1708	30.1932	30.4797	30.5105	30.5167	30.6	30.5203	30.5197	3.15259e-07	4.66061e-06	0.312614
Top1	Q04750	28.8158	28.7232	28.8388	28.7483	28.7307	28.8251	28.8696	29.1645	29.0264	29.1399	29.1343	29.2202	0.000225289	0.00101425	0.31216
Gtf2e2	Q9D902	24.7698	24.3851	24.845	24.6123	24.7869	24.8261	24.9099	25.1844	25.0426	25.2258	24.8785	24.8537	0.00960171	0.0235986	0.311622
Fmr1	E9QAT0	25.8175	25.6878	25.4607	25.8064	25.9184	25.5814	26.0036	25.9699	26.2435	25.935	26.0078	25.98	0.00369226	0.0104313	0.311264
Pls3	B1AX58	27.3832	27.5032	27.7722	27.4602	27.5965	27.4011	27.8318	27.6798	27.8629	27.9523	27.8553	27.784	0.00134216	0.00439289	0.308254
Prpf3	Q922U1	26.5357	26.566	26.6421	26.4002	26.8737	26.5048	26.602	27.0472	26.7818	27.3257	26.7538	26.8608	0.0318452	0.0647945	0.308115
Hnrnpa0	Q9CX86	29.4859	29.2432	29.5784	29.3443	29.3648	29.2698	29.6713	29.8183	29.5093	29.7174	29.732	29.6853	0.000994692	0.00346588	0.307861
Cct5	P80316	31.1741	31.1419	31.0887	31.1299	31.0537	31.0371	31.4486	31.31	31.4372	31.3693	31.5322	31.3674	1.27893e-05	9.3856e-05	0.306519
Dhx9	E9QNN1	30.2641	30.1761	30.2769	30.1691	30.3253	30.2865	30.5459	30.6014	30.5156	30.6405	30.558	30.4749	5.76293e-06	4.83842e-05	0.306407
Nsun2	Q1HFZ0	29.3474	29.4087	29.463	29.4481	29.3648	29.3163	29.8006	29.6826	29.6141	29.6449	29.7762	29.6625	1.32281e-05	9.6191e-05	0.305432
Sec22b	O08547	27.1937	27.2755	27.1787	27.1901	27.4544	27.273	27.5557	27.4067	27.552	27.7268	27.5906	27.551	0.000474423	0.00190739	0.302879
Nars	Q8BP47	29.938	30.0005	30.1317	29.9631	30.1046	30.0669	30.2182	30.3617	30.2475	30.46	30.3967	30.3304	0.000110017	0.000555982	0.301634
Cct7	P80313	31.0601	31.1203	31.1314	31.0466	31.1007	31.0231	31.4077	31.3239	31.3318	31.4052	31.4917	31.331	2.92386e-06	2.77849e-05	0.301503
Prpf31	Q8CCF0-3	27.6717	27.4153	27.5789	27.3061	27.5574	27.5651	27.7539	27.8605	27.5461	28.0599	27.8681	27.8119	0.00614807	0.0161108	0.301008
Ddx56	Q9D0R4	26.1977	26.2042	26.2771	26.312	26.3413	26.2381	26.5703	26.4529	26.4156	26.8738	26.5292	26.5343	0.00165628	0.00527143	0.300964
Srsf11	D3Z4B0	25.8522	25.7467	26.048	25.5638	25.9445	25.6705	25.9761	26.235	26.2771	26.2291	25.9073	25.9985	0.0122401	0.0287723	0.299589
Psmc5	P62196	29.2542	29.3179	29.3731	29.318	29.4186	29.2833	29.6384	29.6782	29.525	29.6849	29.7114	29.5236	3.00928e-05	0.000192836	0.2994
Snx6	Q6P8X1	26.2417	26.3764	26.1146	26.2189	26.1423	26.0709	26.6316	26.2462	26.599	26.4676	26.4772	26.5358	0.00193396	0.00602897	0.298764
Prpf19	Q99KP6	29.9668	29.9452	29.9345	29.7818	29.8274	29.8899	30.0209	30.2634	30.2245	30.1116	30.2568	30.2587	0.000153513	0.000733572	0.298365
Eif3c	Q8R1B4	29.5952	29.5158	29.5713	29.4959	29.4311	29.6243	29.7169	29.7816	29.8256	30.0309	29.9218	29.7453	0.000368056	0.00151806	0.298109
LOC102641464	Q9R0Q7	30.241	30.1435	30.2617	30.3121	30.0034	30.1081	30.5034	30.4846	30.4195	30.463	30.5316	30.4515	0.000130342	0.000637416	0.29728
Ppid	Q9CR16	31.4389	31.3562	31.4879	31.3883	31.4313	31.4085	31.6633	31.7055	31.6597	31.791	31.7754	31.6973	1.43579e-06	1.53933e-05	0.296844
Gar1	D3YZ09	26.6294	26.8758	26.9308	26.5889	27.0605	26.8595	26.8756	27.1933	27.0717	27.0354	27.1866	27.3584	0.0143212	0.0328107	0.296018
Ubr4	A2AN08-3	26.1522	26.2336	25.9243	26.0941	25.9233	25.8539	26.8199	26.167	26.4563	26.2652	26.0634	26.1834	0.0438375	0.0847609	0.295641
Cct6a	P80317	31.334	31.358	31.3373	31.2836	31.3727	31.3373	31.7029	31.6073	31.6104	31.6124	31.6635	31.5911	8.04485e-08	1.7474e-06	0.29411
Tuba1b	P05213	33.3428	33.3933	33.5625	33.4361	33.4961	33.3863	33.7351	33.7091	33.6965	33.7786	33.7656	33.6905	1.06699e-05	8.05665e-05	0.293076
Rpl35a	O55142	30.8481	30.5772	30.7009	30.7121	30.4516	30.6695	30.671	30.9732	30.9433	30.8266	31.1164	31.1828	0.0111303	0.0266124	0.292302
Ctps	P70698	27.7744	27.8754	27.5811	27.8128	27.7081	27.6935	28.0878	28.0405	28.0539	28.0686	28.0212	27.9257	0.000121882	0.000599551	0.292043
Srgap2	A0A087WNM1	25.6378	25.5013	25.5042	25.4102	25.6002	25.6471	26.1387	25.8776	26.0384	25.8442	25.5199	25.6148	0.0198987	0.0435041	0.288797
Ddx27	Q921N6	27.4702	27.5544	27.4158	27.1417	27.3942	27.4108	27.731	27.7945	27.6212	27.6755	27.6855	27.6103	0.00103038	0.00357164	0.288494
Rbm17	Q8JZX4	25.5884	25.8916	25.6904	25.8386	25.9152	25.8072	26.2962	25.9109	26.2147	25.6799	26.2103	26.1434	0.0244527	0.0515402	0.287371
Nfkb1	P25799-4	26.5413	25.9745	26.1792	26.0229	26.3694	26.0322	26.4678	26.4849	26.1572	26.6053	26.6534	26.4718	0.0331642	0.0669488	0.286816
Kars	Q99MN1	29.637	29.636	29.7596	29.6134	29.6033	29.6558	29.8583	29.9362	29.8956	30.1069	30.001	29.8267	0.00013626	0.000664417	0.286575
Rpl8	P62918	31.1145	31.0297	31.0928	31.0128	30.9422	31.0496	31.3246	31.259	31.2375	31.2613	31.4827	31.3822	0.000101393	0.000521784	0.284254
Eif2s2	Q99L45	29.3597	29.2926	29.2464	29.2908	29.2698	29.2924	29.5829	29.6507	29.4164	29.5737	29.6817	29.5483	4.02932e-05	0.000243726	0.283665
Eftud2	A2AH85	29.1445	29.0931	29.0539	29.1163	29.2398	29.1115	29.3763	29.4553	29.4575	29.4706	29.349	29.3359	1.35095e-05	9.80247e-05	0.280883
Gm20425	E9Q035	28.0715	27.855	28.1699	27.9255	28.1547	28.1315	28.3007	28.4067	28.1419	28.5824	28.2853	28.2755	0.00605395	0.0159077	0.280718
Edc3	Q8K2D3	24.0785	23.931	23.7883	24.0445	23.9775	23.633	24.2543	24.1795	24.1572	24.2452	24.0925	24.2012	0.00340135	0.00977451	0.279498
Coro1a	O89053	31.4195	31.4244	31.409	31.3397	31.2686	31.3263	31.5931	31.6707	31.6517	31.7063	31.6821	31.5534	1.24226e-05	9.15278e-05	0.278293
Nup98	Q6PFD9	28.1441	27.9468	28.0082	28.1559	28.1095	27.9882	28.3301	28.3726	28.2167	28.3734	28.3613	28.3571	8.73177e-05	0.000460232	0.276396
Ctnnd1	G3X9V2	27.5049	27.6268	27.51	27.5356	27.7085	27.4488	27.7849	27.8774	27.8805	27.856	27.8204	27.7727	7.75343e-05	0.00041831	0.27621
Sec11a	D3YWT0	26.84	26.7769	26.432	27.0019	26.5251	26.8778	26.771	27.0089	27.0135	27.3904	26.8931	27.0323	0.0490778	0.0930642	0.275919
Raver1	Q9CW46	27.6803	27.3237	27.601	27.3702	27.6524	27.6324	27.8883	27.7839	27.9572	27.7296	27.7431	27.8084	0.00362056	0.0102721	0.27507
Prpf4	Q9DAW6	27.1406	26.8252	26.9749	26.4953	26.7929	26.9419	27.1068	27.2221	27.0069	27.2815	27.1855	27.0178	0.0204764	0.0445052	0.27497
Gm9774	A0A0A6YVU8	26.683	26.8554	26.8342	26.6934	26.8324	26.4447	26.9914	27.0498	26.9939	27.0029	26.9599	26.9923	0.00173105	0.00547294	0.274497
Vapa	Q9WV55	28.2646	28.3951	28.4364	28.5696	28.1097	28.3473	28.6525	28.5501	28.5363	28.393	28.914	28.7227	0.0181473	0.0401472	0.274287
Heatr1	G3X9B1	27.8249	27.6364	27.8608	27.9569	27.8529	27.9547	28.0033	28.1168	28.2399	28.275	28.0709	28.0222	0.00210214	0.00649875	0.273583
Rae1	Q8C570	27.1891	27.3482	27.4121	27.2047	27.2837	27.2873	27.5931	27.4785	27.4949	27.5926	27.581	27.615	6.80431e-05	0.000374966	0.271649
Lars	Q8BMJ2	29.535	29.4537	29.5059	29.5112	29.5103	29.5368	29.7554	29.7688	29.7668	29.757	29.7972	29.8354	2.73248e-08	8.20982e-07	0.271304
Hnrnpa3	A2AL12	32.1859	32.0996	32.404	32.2048	32.169	32.2373	32.4689	32.5423	32.4257	32.5556	32.5153	32.4185	0.000223708	0.00100986	0.270958
Srsf9	Q9D0B0	26.0019	25.9048	25.7649	25.8371	26.0804	25.8376	26.0867	26.2625	26.0372	26.2759	26.1441	26.2455	0.00158174	0.00506309	0.27085
Uba1	Q02053	31.1648	31.1444	31.1861	31.1244	31.1574	31.1622	31.431	31.3869	31.4138	31.5083	31.4671	31.3539	5.64002e-07	7.41809e-06	0.270288
Map2k1	P31938	28.2148	28.0224	28.3878	28.2104	28.0698	28.162	28.3921	28.397	28.3973	28.5612	28.4916	28.4464	0.00106545	0.00366661	0.26973
Ranbp1	P34022	29.8236	29.8459	29.8622	29.9121	29.9053	29.7042	30.0421	30.0947	30.1086	30.1235	30.1535	30.1493	1.70444e-05	0.000118531	0.269723
Camk2d	A0A0G2JDC1	26.4785	26.1116	26.2355	26.0584	26.2408	26.2565	26.6661	26.3914	26.5256	26.626	26.4057	26.3805	0.00649988	0.0168283	0.269018
Smarce1	O54941	25.8543	25.88	26.0067	25.7554	26.0057	25.8959	26.0758	26.0619	26.1051	26.4077	26.1269	26.2317	0.00238369	0.00719626	0.268523
Gm9825	J3QK23	25.6055	25.5503	25.6379	25.4918	25.3718	25.4546	25.7263	25.5899	25.7464	25.7955	25.7737	26.0891	0.00658548	0.0170367	0.268183
Eef1b2	O70251	30.0389	30.0513	29.8776	29.9602	30.1216	30.0201	30.3541	30.1697	30.3466	30.2261	30.2752	30.3039	0.000140987	0.000684474	0.267632
Rpl26	P61255	30.4548	30.6745	30.5338	30.5712	30.6496	30.4879	30.9457	30.817	30.8802	30.6791	30.8485	30.8068	0.000372715	0.00153493	0.267576
Bms1	Q6PGF5	25.8972	25.8732	25.7449	25.7693	26.2011	26.0857	26.1129	25.9872	26.3893	26.1073	26.3709	26.2036	0.0215893	0.0466211	0.266659
Vta1	Q9CR26	27.8488	27.7428	27.8306	27.6136	27.4539	28.0421	28.029	27.9997	28.1314	28.0433	28.0651	27.8592	0.0153277	0.0347768	0.265989
Psmg4	P0C7N9	25.2668	25.2731	25.4086	25.0968	25.432	25.3525	25.5981	25.623	25.4069	25.7544	25.4798	25.5577	0.00359872	0.0102275	0.265023
Nup35	Q8R4R6	25.8395	25.9762	26.2009	26.0513	26.078	26.1366	26.3177	26.3909	26.3006	26.4877	26.3658	26.0021	0.0112315	0.0267971	0.263716
Matr3	Q8K310	29.6603	29.7228	29.719	29.6729	29.7139	29.6093	29.8369	29.9836	29.8845	30.0049	30.0333	29.933	2.40784e-05	0.000158548	0.262973
Eif3l	Q8QZY1	29.3739	29.2261	29.3532	29.3044	29.4201	29.3972	29.4723	29.5854	29.5115	29.8816	29.7032	29.4976	0.00394638	0.0110281	0.262819
Cct3	P80318	31.508	31.5286	31.55	31.5113	31.3995	31.4757	31.7173	31.7585	31.7873	31.7344	31.8112	31.7404	1.44553e-06	1.54446e-05	0.262687
Uso1	Q9Z1Z0	28.3129	28.3163	28.3574	28.3887	28.2272	28.3004	28.5802	28.5486	28.5979	28.6387	28.6874	28.4248	0.000115395	0.000575367	0.262465
Emc8	O70378	26.1079	26.1808	26.181	25.6391	26.116	25.9907	26.3576	26.1668	26.2166	26.3026	26.5109	26.2356	0.0234846	0.049782	0.262427
Fhl3	Q9R059	26.0939	26.1655	26.1419	26.111	26.0862	25.9872	26.3379	26.5044	26.3797	26.3513	26.3291	26.2574	9.15205e-05	0.000477591	0.262343
Metap1	Q8BP48	26.4546	26.4573	26.3713	26.2285	26.533	26.3939	26.8207	26.6521	26.6675	26.7459	26.6384	26.4868	0.00185234	0.00581792	0.262119
Ddx46	F8WHR6	27.7654	27.6568	27.6872	27.8078	27.7343	27.7909	28.0634	28.1249	27.8628	27.9699	28.035	27.953	0.000168264	0.000792735	0.261076
Cwf19l1	Q8CI33-2	24.2139	24.5293	24.7181	24.8187	24.9213	24.5935	24.817	24.7803	25.0565	25.0478	24.8552	24.797	0.046447	0.0889327	0.259852
Son	H9KV00	26.649	26.7135	26.833	26.6256	26.5457	26.966	26.8704	27.0645	26.9134	27.018	26.9762	27.0339	0.00415295	0.0114997	0.257262
Sec13	Q9D1M0	27.0014	26.9071	27.1697	26.954	27.0292	27.1323	27.2753	27.2728	27.2395	27.4115	27.2894	27.2484	0.00035774	0.00148099	0.257196
Ssrp1	A2AW05	28.2937	27.9634	28.2927	28.0239	28.2	28.1889	28.3043	28.5644	28.3913	28.5517	28.3773	28.3107	0.00577573	0.0153332	0.256204
Abr	E9PUE7	24.9088	25.0927	24.944	24.8839	24.9775	24.963	25.1455	25.3243	25.4586	25.4496	24.9657	24.9618	0.0251299	0.052735	0.255944
Ik	Q9Z1M8	25.9163	25.6915	25.8504	25.8079	25.9128	25.8316	26.0471	26.2475	26.0828	26.1635	25.9479	26.0573	0.000796234	0.00288247	0.255904
Actbl2	Q8BFZ3	33.2335	33.0671	33.1556	33.1645	33.2015	32.9889	33.2408	33.3603	33.44	33.7399	33.3354	33.2279	0.0135139	0.0312183	0.255532
Psmc6	P62334	29.1013	28.9991	29.063	29.0096	29.0605	29.0781	29.2649	29.2486	29.3325	29.3883	29.3831	29.226	1.58305e-05	0.00011148	0.255303
Msto1	E9PUB7	26.3762	26.497	26.4195	26.4617	26.5485	26.321	26.6487	27.1572	26.6256	26.518	26.5266	26.6724	0.0324999	0.0660062	0.254122
Hnrnpu	G3XA10	32.6156	32.6333	32.6567	32.6158	32.5355	32.6451	32.8433	32.8735	32.8285	32.7845	32.9494	32.9472	1.36335e-05	9.84967e-05	0.254089
Dnajc2	P54103	26.4472	26.4256	26.1185	26.4295	26.4546	26.4987	26.8174	26.7309	26.5881	26.5763	26.6225	26.5631	0.00469296	0.0127006	0.254035
Nap1l4	Q78ZA7	27.3936	27.1725	27.0625	27.1791	27.2718	27.0693	27.5422	27.5266	27.4638	27.3272	27.556	27.2532	0.00589674	0.0155312	0.253379
Itgb1	P09055	28.9272	28.8311	28.8797	28.8069	28.9174	28.8319	29.1762	29.1234	29.022	29.1825	29.0264	29.1821	4.81938e-05	0.000283319	0.253064
Bysl	O54825	26.1936	25.897	26.268	25.9887	26.3455	26.2021	26.4136	26.4684	26.2468	26.3873	26.4136	26.4836	0.00878983	0.0218602	0.253052
Ubap2l	Q80X50-2	28.4001	28.4741	28.4695	28.3274	28.3117	28.4199	28.6493	28.7007	28.5799	28.5952	28.7447	28.648	5.68014e-05	0.00032313	0.252532
Tbl3	Q8C4J7	27.9507	27.7691	27.9252	27.7719	27.9678	27.9614	27.9915	28.1352	28.1142	28.2817	28.1891	28.1463	0.000973097	0.00340126	0.251999
Akr1a1	Q9JII6	30.0026	30.0405	30.0823	29.9735	29.9658	30.0748	30.2981	30.2491	30.2202	30.3092	30.3668	30.2072	1.423e-05	0.000102145	0.251847
Atp5b	P56480	32.784	32.9807	32.9209	32.8928	32.8719	32.904	33.1274	33.1297	33.1474	32.9941	33.2353	33.2291	0.000213019	0.0009721	0.251465
Lpxn	Q99N69	28.456	28.4581	28.5865	28.456	28.3143	28.5535	28.6932	28.7549	28.7369	28.743	28.7592	28.643	0.000165447	0.000781667	0.250963
Rcc1	Q6PFB2	28.2141	28.1059	28.2455	28.1837	28.0509	28.1866	28.4206	28.5235	28.3473	28.334	28.4218	28.4436	0.000110033	0.000555982	0.250669
Copb1	Q9JIF7	28.8802	28.7958	28.864	28.8728	29.0774	28.9239	29.1181	29.0056	29.1273	29.2457	29.2145	29.2035	0.000802314	0.00290134	0.250109
M6pr	P24668	28.3086	28.3388	28.5005	28.3347	28.2284	28.2715	28.4495	28.6266	28.4281	28.6522	28.5968	28.7198	0.00217693	0.00668058	0.248443
Sugt1	Q9CX34	27.1196	27.1428	27.1961	27.1767	27.2529	27.3545	27.4147	27.5336	27.3116	27.6094	27.4862	27.3738	0.00139783	0.00454396	0.247761
Srp68	Q8BMA6	27.9152	27.7662	27.8588	27.8431	28.0079	27.9306	28.1327	28.1924	28.2211	28.1705	28.0422	28.0458	0.00030717	0.00131392	0.24719
Napa	Q9DB05	28.7775	28.7379	28.854	28.7829	28.8723	28.7819	29.015	29.0447	29.03	29.0353	29.1512	29.0005	1.07758e-05	8.09997e-05	0.24503
Flii	Q9JJ28	26.6687	26.5129	26.6621	26.5793	26.6327	26.5679	27.0524	26.9226	26.9226	27.0196	26.5101	26.6637	0.0229194	0.0487074	0.244589
Gnl3	Q8CI11	28.3016	28.268	28.2932	28.0832	28.2247	28.169	28.4511	28.5927	28.3941	28.5877	28.3731	28.4031	0.000992541	0.00346199	0.243664
Msra	Q9D6Y7-3	24.9384	25.0924	25.3146	24.7636	25.2358	25.2874	25.2848	25.5746	25.3972	25.2615	25.4139	25.1597	0.046415	0.0889223	0.243234
Aimp1	P31230	29.1991	29.3349	29.3007	29.329	29.2635	29.3304	29.462	29.4598	29.4358	29.6685	29.5981	29.5871	0.000285687	0.00123946	0.242273
Rpa2	Q3TE40	26.1862	25.9661	25.9329	25.9539	26.0916	25.9728	26.2161	26.2237	26.4323	26.2306	26.3114	26.1428	0.0018386	0.00578563	0.242228
Tln1	P26039	32.5117	32.4593	32.5123	32.4003	32.3925	32.4285	32.7247	32.6845	32.6682	32.7766	32.7236	32.5802	3.9034e-05	0.00023783	0.242207
Anxa7	Q07076	28.8882	28.9858	28.9488	29.0156	28.9728	28.9617	29.1782	29.2095	29.1791	29.0904	29.265	29.3038	4.24609e-05	0.000254537	0.242196
Anp32b	Q9EST5	30.0772	30.003	30.0765	30.01	29.8528	30.01	30.26	30.2682	30.1211	30.3298	30.2751	30.2223	0.000271859	0.00118717	0.241156
Rbbp7	Q60973	30.4236	30.4217	30.4166	30.451	30.3346	30.408	30.6213	30.7507	30.5997	30.5311	30.7075	30.6886	6.27063e-05	0.000350757	0.240578
Eif3a	P23116	30.6075	30.4657	30.5249	30.5364	30.4692	30.5592	30.6782	30.775	30.7072	30.9663	30.791	30.6863	0.000654469	0.0024849	0.24019
Srp19	Q9D104	26.5472	26.7255	26.7313	26.8801	26.6494	26.7155	26.9321	26.9494	26.9719	26.8637	26.991	26.9811	0.000582315	0.00226494	0.240046
Ttll12	Q3UDE2	26.7826	26.526	26.631	26.6223	26.5695	26.8531	27.0685	26.7477	26.7363	27.1566	26.9785	26.7318	0.0277516	0.0576578	0.239159
Rpl9	P51410	30.5611	30.5936	30.601	30.4735	30.4616	30.6028	30.9396	30.5697	30.8248	30.7067	30.8665	30.8173	0.00251973	0.00754565	0.238522
Bzw1	A0A087WQS2	28.6954	28.6174	28.6363	28.6413	28.5885	28.5858	28.7584	28.8961	28.8421	28.9059	28.9681	28.8243	3.83714e-05	0.000235077	0.238381
Phpt1	Q9DAK9	25.6344	25.9449	25.7925	25.8644	25.4268	25.8516	25.85	25.9253	26.1363	26.1415	25.9219	25.9669	0.0272499	0.0567565	0.237861
Myl6	Q60605-2	29.7886	29.8246	29.9471	29.8491	29.8179	29.7432	29.9998	30.0454	30.0377	29.9535	30.1643	30.1862	0.000507292	0.00200668	0.236102
Ssr4	Q9D8L3	27.8723	28.1229	27.9245	28.0769	27.9845	28.0365	28.1002	28.2657	28.2161	28.2461	28.2854	28.3192	0.000770229	0.00281268	0.235859
Abcb1b	P06795	26.5588	26.2966	26.4248	26.0804	26.3148	26.3592	26.4746	26.8486	26.4677	26.6002	26.3743	26.6815	0.0334987	0.0675654	0.235412
Snrnp40	Q6PE01	27.1729	27.249	27.255	27.1653	27.0295	27.1023	27.111	27.506	27.4428	27.4705	27.4921	27.3601	0.00761529	0.0193565	0.234751
Nans	Q99J77	28.9176	28.8015	28.6851	28.8178	28.7771	28.7646	29.2947	28.9056	29.1283	28.9367	28.9793	28.9262	0.00724167	0.018562	0.234503
Snrpd3	P62320	28.7886	28.6175	28.6282	28.5395	28.5773	28.7081	28.8237	28.8081	28.8944	28.857	28.9393	28.9432	0.000330505	0.00139237	0.234412
Rpl36a	P83882	29.6645	29.7863	29.813	29.5035	29.5307	29.5271	30.1065	29.8402	29.7826	29.8065	29.8353	29.8594	0.0101951	0.02473	0.234215
Supt16	G3X956	29.0806	29.0648	29.0574	28.9206	28.8708	28.9583	29.0852	29.2897	29.0761	29.4063	29.2729	29.2195	0.00417249	0.0115295	0.23286
Thrap3	Q569Z6	28.4624	28.3806	28.4132	28.3237	28.2451	28.3214	28.4855	28.6393	28.6099	28.8275	28.4693	28.5101	0.00436238	0.011951	0.232519
Lpl	P11152	25.6837	25.3905	25.6703	25.5939	25.857	25.8832	25.5705	26.0253	25.9911	26.0691	25.8884	25.9284	0.0496822	0.093891	0.232373
Tmed10	Q9D1D4	28.4458	28.4793	28.5403	28.4513	28.4053	28.3523	28.5256	28.5777	28.6582	28.81	28.7025	28.7927	0.00144049	0.0046645	0.232054
Psmc2	P46471	30.0841	30.0133	30.0493	30.1168	30.1409	30.0738	30.2404	30.2996	30.2632	30.4081	30.3559	30.3013	2.33078e-05	0.000154385	0.231701
Sec23b	Q9D662	27.6628	27.493	27.3498	27.509	27.631	27.4809	28.036	27.6514	27.7187	27.7618	27.7205	27.6186	0.013027	0.0302817	0.23006
Parp3	Q8CFB8	26.3601	26.1006	26.0201	26.0767	26.1742	25.9717	26.1258	26.461	26.1931	26.577	26.4838	26.2423	0.0339083	0.0681999	0.22993
Nup93	Q8BJ71	28.424	28.4466	28.5194	28.5242	28.5264	28.549	28.669	28.7506	28.6733	28.7709	28.7202	28.7849	1.18227e-05	8.7493e-05	0.229898
Atic	Q9CWJ9	30.8416	30.7452	30.8588	30.8183	30.8568	30.7876	31.0258	31.0728	31.0254	31.1245	31.0373	30.9955	5.06365e-06	4.36544e-05	0.228848
Kpnb1	P70168	30.6653	30.6468	30.7136	30.7822	30.8133	30.6849	30.899	30.9793	30.9657	30.9155	31.0188	30.8979	5.10276e-05	0.000295961	0.228375
Atp2a2	J3KMM5	30.75	30.6907	30.8108	30.7353	30.7187	30.727	30.9035	30.9796	30.8708	31.0545	30.9685	31.0189	3.89445e-05	0.000237718	0.227239
Rpl22l1	Q9D7S7-2	27.7725	27.543	27.7473	27.5823	27.3536	27.5291	27.9543	27.6788	27.9138	27.849	27.616	27.8724	0.022649	0.0483785	0.22606
Chchd3	Q9CRB9	27.4639	27.4064	27.8608	27.4092	27.5985	27.4587	27.7565	27.7575	27.6427	27.7826	27.745	27.8673	0.0153351	0.0347768	0.225693
Ssb	P32067	30.4649	30.386	30.4863	30.3487	30.3876	30.529	30.4925	30.7088	30.5472	30.8564	30.6756	30.6743	0.00359656	0.0102275	0.225406
Hspa9	P38647	32.5981	32.58	32.6569	32.5774	32.6501	32.6019	32.7714	32.8408	32.8168	32.8399	32.8556	32.8914	1.08772e-06	1.25462e-05	0.225227
Prdx5	P99029-2	29.0887	29.1409	29.0368	28.9152	29.1736	29.0863	29.3268	29.2663	29.2379	29.3494	29.2899	29.3213	0.000258231	0.00113956	0.225036
Rps4x	P62702	32.2936	32.2991	32.2049	32.1726	31.9521	32.2016	32.4906	32.304	32.379	32.3301	32.5329	32.437	0.00530304	0.0141909	0.224953
Bclaf1	F8WI22	27.8051	27.8	27.931	27.7406	27.9324	27.7987	28.0314	28.0846	28.0537	28.1055	27.9641	28.1122	0.000201325	0.000925044	0.223975
Cstf2	A2AEK1	26.8546	26.8024	27.0166	26.7031	26.8688	26.6355	27.049	27.0513	26.9999	27.0436	26.9671	27.1126	0.0033163	0.00957119	0.223761
Ctss	F6WR04	26.6263	26.4278	26.7119	26.7895	26.7563	26.5271	26.6999	26.9012	26.8294	27.0125	26.8704	26.8628	0.0104165	0.0252304	0.222866
Smc2	Q8CG48	27.9942	27.8829	27.9698	28.0361	28.1046	27.9126	28.1828	28.1711	28.1401	28.4624	28.2159	28.0622	0.00635026	0.0165176	0.222396
Farsb	Q9WUA2	29.2641	29.1789	29.2558	29.0755	29.2237	29.171	29.5022	29.2657	29.3604	29.5619	29.4647	29.3441	0.00203527	0.00629784	0.221685
Srsf3	P84104-2	30.0652	29.9599	30.0894	29.9837	29.8635	30.0046	30.1564	30.2311	30.1164	30.3737	30.1885	30.2214	0.00114793	0.00388572	0.220176
Upf1	Q9EPU0-2	28.9082	28.8098	28.8932	28.7344	28.8446	28.8432	29.131	29.1536	28.915	29.1601	29.0458	28.9477	0.00147707	0.00477372	0.219959
Psmd7	P26516	28.7737	28.8875	28.8324	28.8748	28.9207	28.7897	28.9989	29.1934	28.9862	29.1452	29.099	28.9696	0.000645608	0.00245684	0.218896
Kpna2	P52293	27.1192	27.0479	26.8017	27.2056	27.0139	26.9654	27.2492	27.2043	27.3138	27.3884	27.15	27.1561	0.00952335	0.0234232	0.21801
Ddx31	Q6NZQ2	25.5527	25.1696	25.2239	25.1989	25.4373	25.3938	25.3775	25.4578	25.5216	25.609	25.6418	25.6765	0.0199125	0.0435057	0.218007
Tubb5	P99024	30.7694	30.7191	30.8436	30.774	30.7432	30.8059	30.9076	30.8333	30.9498	31.149	31.214	30.9085	0.00703254	0.0180953	0.217831
Rpl10a	Q5XJF6	31.0142	31.0375	31.1199	30.9902	30.9919	31.094	31.1901	31.1352	31.2515	31.294	31.3271	31.3562	0.000336341	0.00140632	0.21772
Ap3b1	Q9Z1T1	27.3519	27.2904	27.3657	27.3342	27.4277	27.2714	27.556	27.5076	27.4934	27.6903	27.5812	27.5154	0.000176661	0.000827102	0.21709
Acad9	Q8JZN5	25.2754	25.4132	25.0649	25.2334	25.2022	25.35	25.6314	25.4273	25.4594	25.2559	25.6644	25.3982	0.0218169	0.0469913	0.216255
Srsf6	Q3TWW8	29.2748	29.0957	29.2475	29.2821	29.245	29.1858	29.4229	29.4332	29.4394	29.4488	29.4019	29.4625	3.31364e-05	0.000208348	0.21299
Naa50	Q6PGB6-2	26.3979	26.5004	26.382	26.4321	26.5134	26.7887	26.681	26.621	26.6321	26.7078	26.6598	26.9887	0.0284679	0.0587446	0.212637
Gm10094	E9Q317	26.7493	26.7784	27.1281	26.8154	26.7557	26.9018	26.9967	27.1426	27.0997	26.9977	27.1238	27.0431	0.00823505	0.0207896	0.212444
Arhgef1	E9PUF7	27.1854	27.1472	27.1685	26.9938	27.1054	27.2254	27.1434	27.3137	27.4023	27.595	27.4036	27.2391	0.0145178	0.0331441	0.211883
Rrbp1	A2AVJ7	29.8115	29.7974	29.9083	29.7173	29.7472	29.7223	29.9764	30.0421	29.9844	29.9694	29.9083	30.0809	0.000277356	0.00120488	0.209566
Rpl27	P61358	31.2149	31.1894	31.2551	31.1893	31.1136	31.192	31.3358	31.3207	31.3506	31.4673	31.4718	31.4641	0.000143507	0.000694691	0.20934
Pfn1	P62962	31.7227	31.9695	31.9857	31.9891	31.9627	31.8614	32.1486	32.0772	32.1446	32.0212	32.2315	32.1167	0.00249348	0.00748701	0.208111
Srp72	F8VQC1	28.2209	28.0185	28.1596	28.1806	28.1939	28.3707	28.4515	28.3751	28.2857	28.3908	28.4569	28.4296	0.00291678	0.00857529	0.207542
Tcp1	P11983	31.418	31.4094	31.4667	31.4139	31.3722	31.396	31.6248	31.5931	31.5924	31.6748	31.6534	31.5776	1.31295e-06	1.43056e-05	0.206655
Rpl10	Q6ZWV3	30.9698	31.0992	30.9272	31.1074	30.9578	31.0356	31.3088	31.1439	31.0796	31.2292	31.3144	31.2599	0.00187149	0.00586705	0.206449
Vps4b	P46467	27.7764	27.7734	27.8447	27.7886	27.7921	27.846	27.9587	28.0984	27.8798	28.1688	28.0084	27.9432	0.00112166	0.00381296	0.206046
Myo1e	E9Q634	27.5177	27.4502	27.4005	27.3546	27.545	27.228	27.6122	27.6733	27.5326	27.5433	27.7625	27.6077	0.00580838	0.0153589	0.205926
Smc4	E9Q2X6	26.4285	26.181	26.0763	26.3048	25.8973	26.0643	26.4911	26.3873	26.2575	26.5191	26.2889	26.2425	0.0483215	0.0919428	0.205689
D19Bwg1357e	Q8BKS9	27.4946	27.2415	27.2822	27.3201	27.405	27.4233	27.591	27.5438	27.4158	27.5969	27.6607	27.5904	0.00262012	0.00776687	0.205295
LOC102641436	P59325	27.8193	27.7955	27.9544	27.7329	27.905	27.8502	28.0425	27.9367	27.9701	28.254	28.1135	27.9692	0.00571532	0.0152035	0.204809
Nomo1	Q6GQT9	27.7356	27.7369	27.7494	27.6319	27.7637	27.7046	27.8726	27.8894	27.935	28.1155	27.8845	27.8442	0.00106021	0.00365231	0.203175
Bub3	Q9WVA3	28.5163	28.3147	28.4379	28.2873	28.4199	28.3671	28.5659	28.6351	28.55	28.6776	28.5587	28.5727	0.000522462	0.00205846	0.202817
Eif1ax	Q8BMJ3	28.8849	28.6927	28.8242	28.4945	28.775	28.7765	28.814	28.904	28.9074	29.1178	28.9943	28.9265	0.0156747	0.0354268	0.202701
Gorasp2	A2ATI9	26.1703	26.0836	26.176	26.2378	26.1912	25.957	26.6568	26.3431	26.2304	26.2949	26.345	26.1558	0.0328732	0.0664819	0.201663
Tmed9	Q99KF1	27.2813	27.4143	27.5797	27.5974	27.7278	27.4311	27.5007	27.5699	27.7064	27.7923	27.8696	27.8012	0.0447599	0.086295	0.201423
Pes1	Q5SQ20	28.394	28.31	28.4211	28.2662	28.3694	28.2716	28.4649	28.5335	28.3801	28.6763	28.6011	28.5835	0.00262146	0.00776687	0.201207
Tsg101	Q61187	23.8853	23.8419	23.9132	24.0286	23.9525	24.0842	24.2556	23.8333	24.0693	24.0859	24.3212	24.3438	0.045096	0.0868429	0.200566
Fubp3	A2AJ72	27.5787	27.4122	27.2935	27.3677	27.3255	27.3759	27.4991	27.7026	27.4443	27.751	27.6759	27.4735	0.0153493	0.0347854	0.198815
Ddx39	Q8VDW0	30.8345	30.9086	31.0135	30.8945	30.9116	30.8346	30.9643	31.111	30.9824	31.1596	31.2034	31.1605	0.00239709	0.00723018	0.197299
Cct4	P80315	31.6202	31.5747	31.6096	31.5268	31.5284	31.5363	31.7638	31.7435	31.7008	31.8265	31.819	31.7242	2.51545e-05	0.000164019	0.196971
Acsl4	Q9QUJ7-2	28.7131	28.5955	28.6687	28.6464	28.6021	28.7617	28.8206	28.908	28.8612	28.8987	28.8301	28.8451	6.88497e-05	0.000378164	0.196021
Sf3b2	Q3UJB0	28.8037	28.7258	28.7077	28.787	28.5205	28.7203	28.8757	28.9622	28.8266	28.8162	28.9748	28.9827	0.00356476	0.0101568	0.195543
Eif3k	Q9DBZ5	28.1659	27.9942	28.247	28.1589	28.1781	28.1487	28.227	28.259	28.3663	28.5744	28.3461	28.2904	0.00966298	0.0237052	0.195053
Usp14	Q9JMA1	29.7756	29.8329	29.9239	29.8815	29.8252	29.8032	29.9683	30.0661	30.0316	30.0452	30.0367	30.059	2.32388e-05	0.000154233	0.194085
Anp32e	P97822-2	28.4049	28.5298	28.4458	28.551	28.785	28.7358	28.9025	28.6944	28.8028	28.6544	28.7757	28.7864	0.0227407	0.0484856	0.193999
Sae1	Q9R1T2	27.942	28.1193	27.8831	28.1924	28.0478	27.7976	28.1824	28.1169	28.1683	28.1314	28.3611	28.1805	0.0212272	0.0459876	0.193056
Psmd11	Q8BG32	29.5247	29.4706	29.5933	29.471	29.5311	29.5308	29.6838	29.7126	29.6562	29.7828	29.7676	29.6764	4.40377e-05	0.00026211	0.192999
Rnpep	Q8VCT3	28.7992	28.8833	28.7982	28.8211	28.7127	28.8079	29.0921	29.033	28.9852	29.0668	29.0381	28.7625	0.00505583	0.0135837	0.192512
Gpd2	Q64521	27.8382	27.664	27.8042	27.7345	27.8257	27.8443	28.0103	28.0874	27.848	27.9668	27.9465	28.0068	0.0013341	0.00437079	0.192479
Aimp2	Q8R010	28.162	28.1079	28.1245	27.9774	28.2104	28.1358	28.2623	28.3288	28.348	28.4026	28.3986	28.1326	0.00433967	0.0118985	0.192465
Dusp3	B1AQF4	28.3732	28.3647	28.3472	28.2278	28.2975	28.4034	28.4169	28.5816	28.526	28.6058	28.6066	28.4312	0.00129921	0.00427741	0.192386
Plec	Q9QXS1-15	31.0229	30.9022	30.97	30.8887	30.9459	30.9171	31.1432	31.1433	31.0812	31.2845	31.0595	31.0891	0.000592352	0.00229331	0.192329
LOC100044627	P62830	30.7352	30.7903	30.8351	30.7378	30.7413	30.7846	30.9458	30.9385	30.9501	30.9784	31.0112	30.9496	2.12085e-06	2.1304e-05	0.191547
Hsp90b1	P08113	33.1621	33.1147	33.2194	33.1966	33.1707	33.1898	33.417	33.4015	33.3316	33.3047	33.3913	33.3519	9.14836e-06	7.03477e-05	0.190776
Rrp1	P56183-2	26.5382	26.3946	26.2608	26.5622	26.5691	26.5227	26.7642	26.7197	26.7572	26.5441	26.6611	26.5452	0.014547	0.0331696	0.190677
Celf1	P28659-2	27.0825	27.0839	27.143	27.1908	26.8711	27.0561	27.1984	27.2545	27.2429	27.2197	27.4241	27.2287	0.00673579	0.0173852	0.190143
Cad	E9QAI5	30.2751	30.1813	30.3126	30.1935	30.2402	30.2442	30.4237	30.3914	30.3899	30.5562	30.4436	30.3751	0.000234496	0.00104865	0.188831
Psat1	Q99K85	30.5565	30.5615	30.6486	30.5907	30.6586	30.5867	30.7275	30.7685	30.7677	30.9127	30.9362	30.6221	0.00424896	0.0116978	0.188726
Uba2	Q9Z1F9	28.3637	28.4037	28.3341	28.375	28.3621	28.3712	28.5626	28.5754	28.5271	28.7317	28.3955	28.5487	0.00182876	0.00576007	0.188522
Acly	Q3V117	29.7998	29.7471	29.8132	29.8064	29.7806	29.7218	29.9644	29.9604	29.9235	30.0561	30.0351	29.8599	0.000194561	0.000900146	0.188437
Cdc5l	Q6A068	27.6897	27.7584	27.8058	27.5419	27.5798	27.7608	27.926	27.8978	27.8083	27.8949	27.8685	27.8716	0.00234759	0.00710008	0.188425
Mta2	Q9R190	28.3199	28.306	28.4646	28.309	28.3537	28.386	28.5596	28.6652	28.4406	28.6252	28.4807	28.4982	0.00151243	0.00485843	0.188359
Hspd1	P63038	33.7813	33.776	33.782	33.8157	33.7475	33.7648	33.9077	33.9288	33.9497	33.9248	33.988	34.0888	6.99975e-05	0.000382751	0.186755
Rrp12	Q6P5B0	28.2298	28.1252	28.1887	28.2572	28.3727	28.4687	28.3938	28.5631	28.5429	28.4859	28.3772	28.3984	0.01235	0.0289697	0.186514
LOC102642938	O88569	32.6411	32.6135	32.6553	32.6632	32.6132	32.669	32.8094	32.8616	32.7997	32.8266	32.8496	32.8244	1.00544e-07	1.96678e-06	0.185986
Nol6	Q8R5K4	27.3486	27.0557	27.3283	27.2135	27.3967	27.1315	27.3318	27.4922	27.4973	27.531	27.3158	27.3979	0.0209831	0.045504	0.181942
Cluh	Z4YLI8	23.3192	22.0497	23.6044	23.4527	23.5194	23.6555	21.9155	22.4118	22.6315	22.4588	21.5662	21.5647	0.00383798	0.0279048	0.181544
Cluh	Q5SW19	26.7106	26.7304	26.747	26.9079	26.7892	26.9898	26.9099	26.9013	27.0454	27.0625	27.1165	26.9285	0.0118126	0.0279048	0.181544
Ywhab	Q9CQV8	30.0044	30.055	29.997	29.8511	29.6732	29.8493	30.0909	30.0903	30.0266	30.13	30.1264	30.0349	0.0148181	0.0337188	0.178187
Fkbp8	O35465-2	27.5675	27.385	27.5546	27.5249	27.2769	27.4305	27.7241	27.5444	27.6828	27.6881	27.5634	27.5985	0.00966676	0.0237052	0.176968
Tmod3	Q9JHJ0	26.8994	26.8716	27.0448	26.8729	26.9205	26.8209	26.9961	27.0009	27.1285	27.139	27.2619	26.9616	0.0107123	0.0258346	0.176312
Psmc4	P54775	29.2461	29.1139	29.1611	29.1431	29.3078	29.3364	29.4591	29.3883	29.4005	29.2808	29.4157	29.4186	0.00293328	0.0086144	0.175778
Rpl11	Q9CXW4	30.6894	30.4071	30.4151	30.4992	30.4522	30.4746	30.7158	30.6081	30.769	30.8137	30.6129	30.4716	0.0248033	0.052115	0.175566
Snrnp200	Q6P4T2	29.4901	29.4331	29.5163	29.4075	29.4233	29.3908	29.6149	29.7139	29.6374	29.6632	29.5817	29.4989	0.000684484	0.00256681	0.174831
Rpl13	P47963	31.8192	31.694	31.7169	31.6834	31.6373	31.7209	31.9317	31.7734	31.9066	31.9209	31.8951	31.892	0.000448418	0.00181373	0.174621
Rplp0	P14869	31.8176	31.7111	31.8637	31.7565	31.763	31.775	31.8486	31.8602	31.8689	32.0734	32.0645	32.009	0.00515403	0.0138365	0.172931
Nup133	Q8R0G9	27.3569	27.1715	27.2131	27.2363	27.3546	27.3777	27.4157	27.5733	27.3856	27.5476	27.3503	27.4725	0.00727994	0.018603	0.172478
Prpf6	Q91YR7	27.014	26.6757	27.023	26.8012	26.9198	26.9478	27.0031	27.0999	27.0142	27.1446	27.1079	27.0395	0.0167969	0.0375572	0.171288
Sfn	O70456	29.8086	29.7226	29.785	29.6468	29.6057	29.8012	29.8715	29.917	29.9317	30.0775	29.8203	29.7755	0.0116692	0.0276245	0.1706
Ola1	Q9CZ30	28.7641	28.6538	28.5884	28.4997	28.8095	28.7881	28.9822	28.8124	28.8103	28.9247	28.8238	28.7719	0.018307	0.0404739	0.170286
Dhx38	Q80X98	25.3638	25.3936	25.2454	25.201	25.2931	25.3393	25.515	25.4972	25.4162	25.5644	25.5218	25.342	0.00354289	0.0101118	0.170047
Farsa	E9PWY9	28.817	28.5257	28.7041	28.5843	28.8501	28.7422	28.7987	28.8926	28.8917	28.9024	28.9339	28.8207	0.0131878	0.0306128	0.169435
Dnaja3	Q99M87-2	27.2332	27.0298	27.1057	27.1549	27.149	27.1518	27.3829	27.3018	27.4196	27.2341	27.2644	27.2349	0.00247564	0.00744025	0.168885
Klc1	Q5UE59	26.7688	26.6092	26.6271	26.548	26.5793	26.5485	26.7946	26.7148	26.7672	26.859	26.7888	26.7641	0.00149611	0.00483059	0.167923
Ppp2r1a	Q76MZ3	30.4096	30.457	30.5379	30.4984	30.4954	30.4375	30.6097	30.6498	30.6465	30.6375	30.7142	30.5686	0.000127607	0.000624955	0.165118
Calr	P14211	32.6369	32.6088	32.6923	32.6294	32.6177	32.6118	32.7456	32.8403	32.7674	32.7995	32.8197	32.8113	6.1191e-06	5.079e-05	0.164495
Ipo4	Q8VI75	27.3899	27.3173	27.2579	27.3293	27.2889	27.2447	27.598	27.3644	27.5477	27.4642	27.3498	27.4836	0.00497111	0.0133884	0.163298
Cct8	P42932	31.8108	31.7995	31.9137	31.842	31.812	31.7917	31.936	31.9448	31.9594	32.1347	32.0178	31.9503	0.00118842	0.00399926	0.16221
Ubtf	A2AWT6	27.309	27.4132	27.4067	27.0499	27.3482	27.3096	27.446	27.5983	27.4316	27.5595	27.434	27.3371	0.03636	0.0724386	0.161678
Sdf2l1	Q9ESP1	28.5122	28.4686	28.4918	28.3226	28.2238	28.3935	28.5889	28.56	28.5042	28.5736	28.5497	28.6044	0.00715586	0.0183702	0.161353
Ipo9	E9QKZ2	27.3743	27.4371	27.6146	27.3798	27.6296	27.3256	27.7247	27.6998	27.703	27.6005	27.4795	27.5201	0.0396625	0.0778282	0.161124
Copz1	P61924	27.3281	27.3199	27.4414	27.3569	27.3985	27.4105	27.553	27.4209	27.5097	27.6461	27.6239	27.4594	0.00324585	0.00940848	0.159592
Aldh18a1	Q9Z110-2	29.9588	29.9326	29.9411	29.8657	29.8906	30.0121	30.072	30.1285	30.0033	30.1577	30.0679	30.1174	0.00045122	0.00182286	0.157681
Esyt1	Q3U7R1	28.6129	28.5303	28.5846	28.5652	28.6612	28.6347	28.772	28.7511	28.6895	28.7859	28.7633	28.7704	6.45855e-05	0.000359793	0.157209
Ptbp1	Q8BGJ5	31.3043	31.3256	31.3265	31.3448	31.3112	31.2523	31.4346	31.5115	31.5009	31.4326	31.4801	31.4407	1.13824e-05	8.46089e-05	0.155954
Phb2	O35129	31.0238	30.982	31.1031	31.019	30.9808	30.973	31.1165	31.1796	31.1771	31.1853	31.1766	31.1814	4.16005e-05	0.000250727	0.155796
Txnl1	Q8CDN6	29.4711	29.2789	29.2439	29.1916	29.1799	29.2187	29.4132	29.4646	29.4002	29.4547	29.3631	29.4229	0.0073267	0.0186797	0.155768
Glud1	P26443	30.0842	30.0967	30.1066	29.9925	29.9665	30.0103	30.0634	30.2211	30.2007	30.1568	30.3203	30.2252	0.00445865	0.0121451	0.155108
Trmt2a	Q3UYU2	26.9601	26.6087	26.7053	26.8597	26.9634	26.9287	26.8682	27.0141	26.9809	27.0098	27.1047	26.9765	0.0462029	0.0886174	0.154701
AI314180	Q6PDI5	28.3913	28.3399	28.2712	28.4478	28.4545	28.5541	28.6089	28.616	28.6232	28.5109	28.5438	28.4715	0.00966071	0.0237052	0.152596
Rpn1	Q91YQ5	31.4105	31.2854	31.4542	31.3879	31.4308	31.3039	31.4595	31.5968	31.4759	31.6102	31.5475	31.4975	0.00259198	0.00769314	0.15243
Mars	E9QB02	29.4406	29.4509	29.3657	29.3833	29.3761	29.3544	29.6071	29.5141	29.5311	29.699	29.4824	29.4486	0.0039923	0.0111378	0.151917
Atp5c1	Q8C2Q8	30.0624	30.1908	30.1533	30.1365	30.0914	30.1198	30.2752	30.3322	30.2136	30.2738	30.2627	30.3076	0.000115113	0.000575367	0.151808
Rpl12	P35979	31.7611	31.6919	31.7605	31.5676	31.6591	31.7143	31.8296	31.7688	31.8316	31.9848	31.8578	31.7922	0.00538567	0.014389	0.151719
Itga4	Q792F9	26.7259	26.6005	26.638	26.5931	26.7132	26.5007	26.867	26.6388	26.7747	27.0025	26.7165	26.6815	0.0413028	0.0805585	0.151626
Xrn2	Q9DBR1-2	27.8822	27.8077	27.8367	27.6559	27.7854	27.6967	27.8101	28.0394	27.9026	27.9722	27.8994	27.9391	0.00985957	0.024084	0.149724
Zmpste24	Q80W54	26.5855	26.7279	26.905	26.7401	26.641	26.6668	26.9002	26.9198	27.0167	26.753	26.7576	26.816	0.0363453	0.0724386	0.149523
Rap1b	Q99JI6	30.0534	29.7783	29.9753	29.9843	30.0398	30.0522	30.0172	30.2435	30.1183	30.2734	30.0484	30.0778	0.0338042	0.0680766	0.149224
Hspa14	Q99M31	27.4588	27.375	27.3453	27.3614	27.4307	27.381	27.5004	27.5251	27.5437	27.714	27.5796	27.3823	0.0107641	0.0259036	0.14885
Nup37	Q9CWU9	26.2837	26.1899	26.2732	26.3062	26.2656	26.4497	26.5467	26.4797	26.4688	26.474	26.2209	26.4615	0.0288864	0.0594982	0.147178
Pds5a	E9QPI5	28.1528	27.9393	27.9838	27.7373	27.9768	28.0514	28.1496	28.1511	28.2145	28.103	28.1083	27.9903	0.0461418	0.0886017	0.145888
Psmd1	Q3TXS7	29.5955	29.4363	29.6607	29.5625	29.6051	29.5805	29.6436	29.7022	29.68	29.8126	29.7576	29.7021	0.00448816	0.0122155	0.14289
G3bp2	P97379-2	27.9338	27.7909	27.926	27.8662	27.846	27.8032	27.8374	28.1153	27.8726	28.0606	28.1673	27.9682	0.0378883	0.0751254	0.142536
Stoml2	Q99JB2	28.1865	28.1794	28.1363	28.1196	28.2654	28.2629	28.4296	28.4218	28.2113	28.3526	28.3493	28.231	0.0112631	0.0268531	0.14094
Rpl14	Q9CR57	30.8714	30.8585	30.9183	30.8634	30.9248	30.8649	30.9602	30.9399	30.9799	31.1562	31.0807	31.0286	0.00277356	0.00817407	0.14068
Ppp2ca	P63330	28.4979	28.4298	28.5336	28.3098	28.3466	28.3546	28.486	28.4984	28.4853	28.6229	28.7377	28.4785	0.0342072	0.0686813	0.139425
Dars	Q922B2	30.6417	30.6028	30.6814	30.5107	30.5489	30.6301	30.7003	30.7579	30.6684	30.8725	30.746	30.6894	0.00624773	0.0163143	0.136497
Rpl7a	P12970	31.9685	31.9672	31.9784	31.9433	31.9358	31.9158	32.1292	31.9459	32.0537	32.1446	32.1702	32.0701	0.00315413	0.0091904	0.13411
Pdia3	P27773	33.4219	33.4365	33.4564	33.4442	33.4943	33.4248	33.5766	33.5696	33.5376	33.6179	33.5966	33.5842	5.89153e-06	4.91451e-05	0.134047
Rpl28	P41105	31.0491	30.9146	31.0103	30.8283	30.8093	30.8678	30.9877	30.9783	31.0843	31.0224	31.0927	31.1071	0.0168144	0.0375712	0.132193
Cse1l	Q9ERK4	31.9008	31.7091	31.8972	31.9295	31.8122	31.802	32.0623	31.8897	31.9884	32.0641	31.9695	31.8625	0.0218778	0.0470742	0.130945
Dync1i2	A2BFF8	27.6941	27.4812	27.6951	27.496	27.3954	27.6589	27.6342	27.6688	27.7116	27.6461	27.7517	27.7923	0.049232	0.093251	0.130661
Mrpl10	Q3TBW2	26.4486	26.3351	26.6569	26.3764	26.5752	26.4619	26.6553	26.5727	26.4879	26.6492	26.6115	26.6538	0.0442814	0.085471	0.129385
Grpel1	Q99LP6	28.4877	28.3561	28.526	28.4282	28.3771	28.3016	28.4196	28.6064	28.5711	28.5432	28.4485	28.6633	0.0304317	0.0621126	0.129232
Cyb5r3	F2Z456	28.5831	28.5163	28.6179	28.4818	28.246	28.5122	28.6369	28.6151	28.6153	28.6425	28.6139	28.6022	0.0386814	0.076426	0.128071
Ppia	P17742	33.2943	33.2412	33.3093	33.1965	33.2449	33.2452	33.3451	33.3114	33.4002	33.381	33.4708	33.3865	0.0009724	0.00340126	0.127259
Copa	Q8CIE6	30.0765	29.9035	29.9816	29.9998	30.0104	30.0078	30.0469	30.0835	30.0866	30.3089	30.2216	29.9769	0.0467269	0.0894172	0.124126
Smchd1	Q6P5D8	27.734	27.7011	27.6283	27.7827	27.7909	27.7912	27.915	27.9848	27.7613	27.967	27.8163	27.7243	0.0390365	0.0769006	0.12345
LOC102641678	Q9DB20	30.1885	30.1635	30.2073	30.2129	30.1957	30.1438	30.2792	30.3521	30.2691	30.2591	30.3699	30.3131	0.000221761	0.00100342	0.121794
Ptbp3	G8JL74	28.4166	28.359	28.3561	28.1607	28.3999	28.4525	28.4483	28.5587	28.4608	28.4744	28.4252	28.5062	0.0254787	0.0533459	0.121451
Ckap4	Q8BMK4	30.0961	30.0454	30.1657	30.0024	30.0136	30.1005	30.2055	30.2553	30.0693	30.2875	30.1255	30.2061	0.0157937	0.0355997	0.12091
Slc16a1	P53986	26.5582	26.3691	26.5865	26.5852	26.5129	26.3504	26.6295	26.6384	26.7358	26.5443	26.579	26.5456	0.0491615	0.0931702	0.118412
Anp32a	O35381	30.3487	30.2714	30.3855	30.367	30.3785	30.2373	30.3472	30.4342	30.4833	30.6029	30.4486	30.3723	0.0265487	0.0553649	0.116695
Ddx39b	Q9Z1N5	28.8364	28.8142	28.8644	28.798	28.8547	28.8623	28.8784	29.0419	28.8947	29.0757	28.9767	28.8482	0.0163466	0.0366484	0.11428
Rpl4	Q9D8E6	31.9382	31.9142	32.0147	31.9165	31.8386	31.9271	32.0163	31.9329	32.0145	32.1426	32.079	32.0469	0.0114071	0.0271386	0.113832
Cybb	Q61093	28.7665	28.6287	28.7024	28.7681	28.7698	28.7371	28.8463	28.9536	28.7852	28.8145	28.7782	28.8563	0.00986398	0.024084	0.110234
Rhog	P84096	27.9804	28.0115	27.9469	27.9532	27.8924	27.9179	28.0121	28.1682	27.9966	28.1169	28.0121	28.0547	0.00768652	0.0194783	0.109701
Snrnp70	Q62376	28.5365	28.5976	28.6929	28.6149	28.5413	28.5946	28.7723	28.7106	28.7471	28.7511	28.6001	28.6367	0.0156366	0.0353646	0.106679
H2	P50171	24.9492	24.8461	25.0486	24.8598	24.7645	24.9111	23.8132	24.3117	24.4753	23.8424	25.034	24.6894	0.0228568	0.152135	0.105957
Syncrip	G3UZI2	30.4517	30.4132	30.4967	30.5119	30.4795	30.603	30.5277	30.5995	30.6143	30.6762	30.5453	30.6254	0.0120595	0.0284279	0.105391
LOC102642137	P62301	31.3799	31.334	31.4354	31.3375	31.2642	31.2944	31.5049	31.395	31.3817	31.3329	31.4948	31.5622	0.0383099	0.0757793	0.104344
Hyou1	Q9JKR6	30.5305	30.4524	30.6044	30.5574	30.639	30.6299	30.6319	30.6667	30.6583	30.7003	30.696	30.6738	0.00762321	0.0193619	0.102248
Mpp1	P70290	27.6052	27.4522	27.6153	27.4898	27.5648	27.5239	27.6675	27.7166	27.6319	27.6298	27.6715	27.5274	0.023867	0.0504647	0.0989063
Kif5b	Q61768	27.9814	28.023	28.1044	27.9412	27.9229	27.9745	28.1826	28.0934	28.0904	28.0747	27.9865	28.1074	0.0245815	0.0517464	0.0979375
Rpl17	Q6ZWZ7	30.9131	31.0066	30.9896	30.9516	30.9598	30.9142	31.0598	30.9828	30.9998	31.0635	31.1298	31.0771	0.00500727	0.0134749	0.0962963
Immt	Q8CAQ8-3	24.9466	25.0823	25.0868	25.381	24.8225	25.221	25.2577	25.6151	25.446	25.3646	25.5959	25.3088	0.00692181	0.0388548	0.0950802
Immt	Q8CAQ8-2	29.8444	29.9035	29.9181	29.8864	29.878	29.948	29.9134	30.0534	29.9414	30.1005	30.002	29.9383	0.0174818	0.0388548	0.0950802
Psmc1	P62192	29.1486	29.1931	29.207	29.2504	29.3082	29.3009	29.3212	29.2517	29.2616	29.3182	29.4685	29.3401	0.0479105	0.0912645	0.0921749
Rnh1	Q91VI7	31.2544	31.2585	31.3432	31.226	31.3265	31.2957	31.3934	31.4171	31.3296	31.389	31.4109	31.3089	0.00588191	0.0155043	0.0907551
Rpl3	P27659	32.2805	32.2121	32.2344	32.2283	32.2252	32.2083	32.2866	32.2168	32.2952	32.4333	32.3786	32.3068	0.0227326	0.0484856	0.0880699
Ruvbl1	P60122	29.7133	29.7058	29.7795	29.7074	29.7115	29.7848	29.7497	29.7254	29.7774	29.9222	29.889	29.8477	0.0399259	0.0781922	0.0848588
Hnrnpl	G5E924	30.8744	30.8774	30.9429	30.8711	30.8165	30.8446	30.8539	31.0017	30.8978	30.9711	30.9838	31.0072	0.0243543	0.0513652	0.0814227
Atp5a1	Q03265	33.2556	33.2291	33.2987	33.1854	33.2882	33.2519	33.296	33.3478	33.3069	33.3761	33.2847	33.3091	0.0108514	0.0260761	0.0686073
	CON__ENSEMBL:ENSBTAP00000024146	28.3183	28.2743	28.4074	28.3122	28.3761	28.3679	27.1586	27.0253	27.2574	26.9924	27.1154	27.4085	6.46573e-09	0.720788	0.0489592
	P37840	25.8555	22.2598	21.6754	20.9736	22.1642	23.5955	34.6721	34.6099	34.6761	34.6168	34.4761	34.968	1.28594e-08	0.720788	0.0489592
0	A0A0G2JGD2	32.0339	31.6401	31.7668	31.6253	32.0306	31.844	30.4831	30.3958	30.5552	30.7627	30.5875	30.5312	5.76161e-08	0.720788	0.0489592
	CON__Q14525	27.1747	27.1658	27.1863	27.2644	27.353	27.2738	26.2034	26.5096	26.3267	26.4485	26.3948	26.7114	1.02192e-06	0.720788	0.0489592
0	P10404	25.0929	25.036	25.1083	24.904	24.9545	25.0281	23.2373	23.331	24.1096	23.8339	23.6025	23.3838	1.31027e-06	0.720788	0.0489592
	CON__P02769	29.397	29.2557	29.5206	29.2464	29.5019	29.3225	30.0562	29.8493	29.9581	30.0335	29.9795	30.1893	2.6013e-06	0.720788	0.0489592
	CON__P01966	27.0667	27.4379	28.2694	27.3649	27.8606	27.7693	29.0891	29.3301	29.437	29.3734	29.1901	29.5394	3.6768e-06	0.720788	0.0489592
	CON__P12763	27.901	27.9581	28.373	27.8978	28.1314	28.1014	29.0762	28.8686	28.9208	28.9954	28.8717	29.3513	4.03378e-06	0.720788	0.0489592
	CON__P67983	25.726	25.4582	25.3446	25.5477	25.5252	25.4867	22.9232	22.1675	21.6744	23.3305	22.5914	23.9136	8.87615e-06	0.720788	0.0489592
	CON__Q3SX09	28.6116	28.5526	28.7195	28.618	28.6522	28.8053	28.9058	28.9521	29.0801	29.1703	28.9088	29.1204	0.000117092	0.720788	0.0489592
	CON__P01045-1	23.5023	22.5563	23.0571	23.0505	22.8248	23.1695	22.06	21.6666	22.5958	21.6278	21.9877	21.9138	0.000286265	0.720788	0.0489592
	CON__Q3ZBS7	25.7432	25.5654	26.3813	25.4784	26.1965	26.1704	26.8034	26.7418	26.8371	26.8887	26.6589	27.3003	0.000339019	0.720788	0.0489592
	CON__P34955	26.6061	26.7783	26.491	26.7811	26.9535	26.5911	27.3506	27.1609	27.1279	26.9068	27.1213	27.3185	0.000624119	0.720788	0.0489592
	CON__P06868	27.3629	27.0472	27.3248	26.7203	27.2593	27.2882	27.5704	27.6046	27.6205	27.8027	27.622	27.9127	0.00105132	0.720788	0.0489592
	CON__P15636	25.8656	25.5362	25.9078	26.1194	26.6725	25.9544	24.4211	24.8925	25.0434	25.7009	25.1777	24.8509	0.0015483	0.720788	0.0489592
	CON__Q29443	27.4207	25.0287	26.8621	26.248	24.9118	27.0758	28.1923	28.122	28.0841	27.8428	28.2273	27.7203	0.00254403	0.720788	0.0489592
0	A0A0G2JDI9	26.3734	25.992	25.9947	26.2199	26.4078	26.3811	25.8451	25.8949	25.9264	25.5996	25.9874	25.9568	0.00420978	0.720788	0.0489592
	CON__P15497	21.5099	23.7559	24.151	23.719	24.0721	23.8628	24.9016	24.9583	24.5463	25.4883	24.9153	25.6116	0.0052182	0.720788	0.0489592
0	A0A0G2JDP0	24.9569	24.8992	24.3151	24.6935	24.881	24.5608	24.4278	24.1554	24.5577	24.3306	24.3083	23.971	0.00878413	0.720788	0.0489592
0	A0A0G2JDM3	24.4803	25.2146	24.7369	25.5698	24.8497	24.6994	25.4758	25.208	25.4645	25.3578	25.9826	25.7368	0.0114066	0.720788	0.0489592
0	A0A0G2JFK6	21.9119	24.0855	24.023	23.5109	23.7303	22.685	21.8685	22.4494	21.7811	22.8067	22.4751	21.4218	0.0157121	0.720788	0.0489592
0	A0A0G2JDW7	29.7279	29.7157	29.8639	29.8444	29.7843	29.8143	30.0579	29.7859	29.9005	30.0557	29.8605	29.9248	0.0206629	0.720788	0.0489592
Pafah1b1	P63005-2	26.2744	25.8274	25.9264	25.9112	26.0308	25.7686	25.306	25.7912	24.7733	25.1807	25.1122	24.9291	0.000733845	0.809074	0.0249052
Calu	Q6XLQ8	22.2241	22.232	21.347	21.5184	21.8183	21.5453	24.5469	24.2408	24.2587	21.6638	24.496	23.965	0.00134738	0.936025	0.007807
Mdh2	P08249	33.0307	33.0085	33.0818	33.0249	33.0461	33.0288	32.926	32.9521	32.9181	33.0559	32.9564	33.0364	0.0356531	0.0711997	-0.0626274
Parp1	Q921K2	30.3115	30.3078	30.4629	30.3433	30.3879	30.3222	30.2597	30.2926	30.2514	30.3623	30.2877	30.2763	0.044153	0.0852724	-0.0675868
Anpep	P97449	29.3711	29.361	29.3324	29.3425	29.4273	29.4071	29.2718	29.309	29.1623	29.3175	29.3012	29.3866	0.0349731	0.0699253	-0.0821295
Snx5	Q9D8U8	30.382	30.357	30.413	30.3153	30.3957	30.4117	30.2334	30.2786	30.2425	30.3493	30.4156	30.2455	0.0298673	0.0611795	-0.0849342
Trim28	Q62318	30.1232	30.0392	30.13	30.047	30.1075	30.1749	29.9887	30.0411	29.869	30.0987	30.0109	30.0291	0.0277842	0.0576896	-0.0973552
Got2	P05202	31.5159	31.4297	31.4706	31.4658	31.4347	31.5114	31.4389	31.3101	31.3769	31.2622	31.41	31.41	0.00836721	0.0210755	-0.103322
Idh2	P54071	31.218	31.2409	31.2689	31.2104	31.0914	31.237	31.0505	31.0458	31.0865	31.0655	31.1605	31.2119	0.0166061	0.0372052	-0.107648
Mtch2	Q791V5	28.6303	28.6117	28.5749	28.6041	28.7048	28.6252	28.3735	28.4486	28.5444	28.568	28.5698	28.5589	0.0122977	0.0288672	-0.114623
Hist1h4m	P62806	35.4381	35.5874	35.5112	35.5723	35.5047	35.5193	35.2633	35.3238	35.4621	35.5298	35.3843	35.4763	0.0326816	0.0662143	-0.11557
Echs1	Q8BH95	28.0631	27.9854	28.0642	28.0765	28.0167	27.9595	28.0122	27.7488	27.8618	28.0164	27.8689	27.9581	0.0318814	0.0648287	-0.116526
Atl3	E9PYT3	27.0653	27.1065	27.2582	27.028	27.1534	27.2066	26.9141	27.0786	27.0429	27.1265	27.0549	26.9008	0.0470138	0.0899149	-0.116701
Wdr1	O88342	30.0116	29.9232	30.0208	29.9534	29.9167	30.0186	29.8713	29.8951	29.9326	29.8234	29.8593	29.7587	0.00406094	0.0112763	-0.117318
Khsrp	Q3U0V1	29.6781	29.5374	29.6183	29.61	29.5178	29.597	29.4198	29.409	29.4653	29.5024	29.4966	29.5596	0.00519604	0.013938	-0.117657
Trap1	Q9CQN1	30.5773	30.4921	30.6599	30.4787	30.5287	30.549	30.3654	30.4681	30.321	30.5645	30.4315	30.4282	0.0224482	0.0479803	-0.11784
Pak2	Q8CIN4	29.2237	29.203	29.1358	29.1332	29.2033	29.1652	29.0325	28.924	29.023	29.2062	29.0745	29.0636	0.0124009	0.0290077	-0.123378
Gnb1	P62874	30.0706	30.0942	30.2406	30.1646	30.082	30.1556	29.9282	30.0422	29.9879	30.0515	29.9682	30.0505	0.00324868	0.00940852	-0.129835
Aifm1	Q9Z0X1	28.8256	28.7768	28.7704	28.62	28.8174	28.73	28.6623	28.608	28.5242	28.7373	28.5474	28.6789	0.0166271	0.0372274	-0.130338
Rab11b	P46638	29.4811	29.423	29.4835	29.5001	29.4516	29.4894	29.2483	29.3843	29.3141	29.4452	29.3696	29.2767	0.00217413	0.00667813	-0.131758
Ppp1ca	P62137	27.0375	26.9786	26.9134	26.9565	26.886	27.0599	27.0345	26.8033	26.7929	26.817	26.8078	26.7793	0.0203339	0.0443685	-0.13283
Prdx3	P20108	30.22	30.1681	30.1842	30.0898	30.1044	30.1333	29.9687	29.9586	29.8669	30.1074	30.0712	30.115	0.0134999	0.0312075	-0.135327
Atp1a1	Q8VDN2	31.4855	31.3665	31.4859	31.4027	31.3946	31.4156	31.2424	31.3136	31.2227	31.3667	31.2548	31.3253	0.00113802	0.00386073	-0.137546
Bax	Q07813	26.8861	26.8984	27.0151	26.9392	26.8496	26.8837	26.8251	26.7091	26.6003	26.864	26.6986	26.9488	0.0369147	0.0734262	-0.13771
Snx2	Q9CWK8	30.0523	29.9765	29.9643	29.9156	29.8399	29.9028	29.8402	29.7683	29.7673	29.9644	29.875	29.6021	0.0383314	0.0757793	-0.139017
LOC102641332	P62827	31.9076	31.7908	31.8768	31.7753	31.6346	31.8288	31.6597	31.5395	31.6964	31.763	31.659	31.6551	0.0173626	0.0386157	-0.140169
Rcc2	Q8BK67	30.3526	30.3518	30.3597	30.2262	30.2023	30.3251	30.1568	30.1509	30.079	30.2158	30.1676	30.2052	0.00239939	0.0072306	-0.140404
Ilf2	Q9CXY6	27.3618	27.4293	27.3603	27.3995	27.5579	27.677	27.3166	27.3002	27.3135	27.4504	27.3091	27.2485	0.0369282	0.0734262	-0.141247
Ywhaq	F6YY69	29.8672	29.8978	29.9005	29.8593	30.1181	29.9252	29.6869	29.8234	29.7065	29.9754	29.8631	29.6531	0.0493748	0.0934632	-0.14328
Rpn2	Q9DBG6	30.3156	30.2782	30.1968	30.3589	30.3421	30.3441	30.0362	30.2413	30.1598	30.319	30.1195	30.0883	0.0143308	0.0328107	-0.145279
Snrpd1	P62315	28.4586	28.6118	28.3509	28.4533	28.5308	28.3948	28.272	28.39	28.324	28.2572	28.3276	28.339	0.00624412	0.0163143	-0.148393
Atp6v1b2	P62814	30.3271	30.3196	30.4526	30.4273	30.492	30.4726	30.3687	30.2416	30.3448	30.1559	30.2759	30.2127	0.00772413	0.0195588	-0.148598
Prkar1a	Q9DBC7	28.1805	28.1618	28.0745	28.0157	28.0537	27.8339	27.8799	27.8683	27.9963	27.9097	27.942	27.8286	0.0245301	0.0516708	-0.149218
Rab2a	P53994	28.3363	28.3154	28.3045	28.4462	28.4168	28.4219	28.0995	28.2013	28.1189	28.4428	28.2715	28.2053	0.0243399	0.0513652	-0.150294
Ap2m1	Q3TWV4	27.5073	27.5818	27.592	27.6761	27.5056	27.5938	27.4492	27.4923	27.4244	27.3679	27.4724	27.3462	0.00159837	0.00510167	-0.150709
Atp5f1	Q9CQQ7	29.3255	29.0878	29.3317	29.3163	29.2815	29.2595	29.126	29.1784	29.1761	29.0561	28.9438	29.2164	0.0221034	0.0474862	-0.150915
Arl8b	Q9CQW2	29.0765	28.9731	29.2244	29.0364	29.2613	29.2102	28.8535	28.9734	28.8957	29.0533	29.0436	29.047	0.0279845	0.0580337	-0.152548
Mcm2	P97310	28.1291	28.1773	28.3901	28.116	28.1435	28.2342	27.9985	28.0823	27.9483	28.1866	28.085	27.9666	0.0204405	0.0445052	-0.153808
Atg7	Q9D906	27.3839	27.1856	27.4554	27.2895	27.4518	27.2121	27.2611	27.0622	27.1209	27.2222	27.2343	27.1506	0.0228871	0.0486697	-0.154478
Tns3	Q5SSZ5	26.8263	26.8795	26.8791	27.1375	27.0978	27.0848	26.8653	26.7415	26.7824	26.9544	26.866	26.7623	0.0374321	0.074353	-0.155509
Sucla2	Q9Z2I9	28.1731	28.1443	28.2593	28.1083	28.0376	28.2278	28.0036	28.1311	27.7789	28.0645	27.989	28.0351	0.0229624	0.0487678	-0.158057
Pdia4	P08003	30.4616	30.4632	30.5115	30.4337	30.3848	30.463	30.2429	30.2949	30.2765	30.3879	30.3078	30.2538	0.000164705	0.00077926	-0.159012
Tcea1	P10711	27.552	27.6562	27.6917	27.5135	27.5356	27.6435	27.4294	27.4798	27.3189	27.322	27.418	27.6693	0.0255849	0.0534884	-0.159192
Nsfl1c	Q9CZ44	29.2164	29.1267	29.2187	29.0592	29.0837	29.091	28.9358	29.0332	28.8729	29.1694	28.9976	28.8295	0.01943	0.0425907	-0.159535
Tpm3	P21107-2	31.8609	31.853	31.8569	31.8024	31.811	31.7521	31.739	31.5943	31.6353	31.6204	31.6898	31.6987	0.00021727	0.000987456	-0.159811
Paics	Q9DCL9	29.885	29.8531	29.987	29.8647	30.0142	29.9347	29.8488	29.7529	29.7193	29.7431	29.7963	29.713	0.00088642	0.00316444	-0.160889
Cfl1	P18760	32.9844	32.9737	33.0409	32.9256	33.0463	33.0496	32.9326	32.8589	32.7707	32.8317	32.8412	32.8171	0.000309449	0.00132198	-0.161395
Cox4i1	P19783	28.7757	28.8803	28.8429	28.8546	28.9231	28.7466	28.6154	28.7039	28.605	28.8049	28.6398	28.6856	0.00255087	0.00761164	-0.161451
Cenpv	Q9CXS4	27.0062	26.7468	26.9617	26.7443	26.932	26.9724	26.6285	26.7698	26.695	26.9659	26.6402	26.6894	0.0428936	0.0832245	-0.162445
Prps1l3	G3UXL2	29.2232	29.2438	29.1368	29.1579	29.2151	29.3477	29.1787	29.1024	29.0093	28.979	29.0503	29.0293	0.00325497	0.00941859	-0.162592
Vars	Q9Z1Q9	30.3393	30.3631	30.3252	30.2204	30.188	30.1783	30.2055	30.0636	30.067	30.1806	30.1461	29.973	0.00768048	0.0194778	-0.163092
Rps10	P63325	31.5672	31.5035	31.5724	31.4627	31.3569	31.4443	31.1907	31.2638	31.3057	31.3251	31.3273	31.514	0.0141589	0.0325061	-0.163386
Hist1h1e	P43274	30.5617	30.4524	30.4444	30.3495	30.5486	30.5867	30.4172	30.262	30.2826	30.4546	30.2078	30.3274	0.0114947	0.0272887	-0.165261
Hsd17b4	P51660	28.6477	28.4373	28.5905	28.4881	28.5458	28.5734	28.3356	28.3688	28.3451	28.4725	28.282	28.4703	0.00333131	0.00960624	-0.168101
Mtdh	Q80WJ7	28.9021	28.7714	28.7798	28.6475	28.7289	28.8372	28.7088	28.6246	28.709	28.4738	28.4925	28.6413	0.0118397	0.0279491	-0.169515
Pfkl	P12382	29.408	29.2555	29.3321	29.4329	29.4625	29.3706	28.9959	29.1522	29.2366	29.3818	29.2443	29.2207	0.0172238	0.0383325	-0.171681
Snx3	Q78ZM0	28.8968	28.8191	28.9076	28.9484	28.9156	28.9256	28.7223	28.773	28.6602	28.9225	28.7464	28.5563	0.00872568	0.0217654	-0.172066
Etfb	Q9DCW4	29.4878	29.5548	29.5798	29.5061	29.4834	29.5225	29.3542	29.3392	29.2521	29.4945	29.3285	29.329	0.000719125	0.00265798	-0.172818
Mapre1	Q61166	28.9046	28.8703	28.8028	28.7941	28.8752	28.7541	28.6157	28.6421	28.7243	28.792	28.6083	28.5661	0.00181942	0.00573608	-0.175445
Akr1b10	D3Z494	27.5292	27.3209	27.2619	27.3198	27.4934	27.3112	27.3049	27.1828	27.0566	27.3796	27.1847	27.0659	0.0281172	0.0582366	-0.176988
Abce1	P61222	29.2872	29.3319	29.294	29.1186	29.2715	29.1595	29.0611	29.0538	29.0381	29.079	29.1549	29.0087	0.00124462	0.00415079	-0.177847
Mtpn	P62774	28.6461	28.5683	28.5593	28.486	28.4301	28.4725	28.4378	28.1217	28.5012	28.3684	28.3349	28.326	0.0161165	0.0362052	-0.178724
Ctsd	P18242	30.9198	31.1458	31.1165	31.1604	31.164	31.069	30.9571	30.8695	30.8948	30.7394	30.9839	31.053	0.0117221	0.0277302	-0.179626
Atp1a3	A0A0G2JGX4	27.5574	27.6089	27.7069	27.5782	27.7205	27.6713	27.4805	27.6093	27.3448	27.4761	27.3709	27.4806	0.00360238	0.0102292	-0.180163
Atp6v1e1	P50518	28.9351	28.8233	28.934	28.776	28.8295	28.8688	28.7115	28.6088	28.6361	28.752	28.6648	28.7119	0.000356293	0.00147683	-0.180276
Ptpn6	P29351	29.0118	28.9999	29.0328	28.9385	28.9243	29.0166	28.8041	28.6911	28.781	28.9714	28.8359	28.7522	0.0017285	0.00547002	-0.181348
Psme3	P61290	27.3911	27.4048	27.5047	27.4931	27.5889	27.5608	27.1877	27.2793	27.2474	27.4547	27.3238	27.3326	0.00367273	0.0103849	-0.186303
Gm10250	G3X9L6	30.0972	30.1272	30.2527	30.2022	30.1954	30.1493	29.848	30.0193	29.9183	30.1257	29.9617	30.0313	0.00223704	0.00683804	-0.186638
Ddi2	A2ADY9	26.1619	26.1094	26.365	26.2672	26.2273	26.3235	26.1423	26.0431	26.083	26.1832	25.9486	25.9246	0.00854192	0.0213708	-0.188267
Dstn	Q9R0P5	27.8057	27.8324	28.1157	27.9215	27.8799	27.7915	27.7029	27.585	27.6903	27.9175	27.6155	27.6942	0.0192862	0.0423032	-0.19024
Mak16	Q8BGS0-2	25.6674	25.7166	25.9116	25.6654	25.8279	26.0007	25.5228	25.5098	25.6719	25.819	25.514	25.6066	0.0297431	0.0610747	-0.190937
Hnrnpab	Q99020	30.848	30.7394	30.7026	30.5215	30.6905	30.7598	30.3127	30.5056	30.5591	30.5277	30.5655	30.6451	0.0131303	0.0305007	-0.19102
Etfa	Q99LC5	30.0193	30.0321	30.1074	29.9649	30.0397	29.9837	29.807	29.883	29.8056	29.8309	29.7551	29.9126	0.000100139	0.000516921	-0.192152
Rps5	D3YYM6	31.0738	31.1018	31.3585	31.1197	31.1438	31.1568	30.9899	30.8299	30.9727	31.0237	30.9436	31.0287	0.0035592	0.0101496	-0.194359
Suclg1	Q9WUM5	28.8615	28.8543	28.8436	28.6833	28.6857	28.844	28.4645	28.7263	28.4967	28.6586	28.5616	28.6974	0.00643546	0.0166873	-0.194551
Rab5c	P35278	28.42	28.376	28.4992	28.5262	28.408	28.3905	28.0988	28.1341	28.0781	28.5156	28.2376	28.3862	0.0282302	0.0584344	-0.194901
Dhrs7b	Z4YKT6	25.4336	25.5087	25.5226	25.4127	25.5194	25.5176	25.0916	25.2456	25.0778	25.6008	25.303	25.4115	0.0400073	0.0783057	-0.197368
Numa1	E9Q7G0	29.2276	29.1538	29.3096	29.0792	29.1058	29.1829	29.0924	29.082	28.8763	29.0129	28.8657	28.9418	0.00393794	0.0110137	-0.198009
Dock2	Q8C3J5	28.1229	27.9164	28.0809	28.1026	28.1733	28.1344	27.6956	28.0111	27.9473	28.1046	27.9582	27.6248	0.0421289	0.0818832	-0.198144
Ap2a1	P17426-2	28.2469	28.197	28.2457	28.2005	28.3347	28.2201	28.1137	28.1523	27.9373	28.0359	27.9584	28.0391	0.000515983	0.00203534	-0.201338
Tmem43	Q9DBS1	26.308	26.0221	26.2216	26.0203	26.2967	26.1581	25.7931	26.1705	25.9163	25.9259	25.9912	26.0195	0.0204764	0.0445052	-0.201698
Actr2	P61161	29.8961	29.9331	29.8289	29.9549	29.991	30.0517	29.7025	29.6086	29.6754	29.901	29.8176	29.7405	0.0034638	0.00992838	-0.201698
Alcam	E9Q4G8	26.6525	26.5026	26.5209	26.5332	26.5243	26.4651	26.3519	26.3644	26.1566	26.2938	26.2634	26.5451	0.00604874	0.0159065	-0.20392
Vdac3	J3QMG3	28.8399	28.6085	28.9095	28.682	28.6939	28.8496	28.3375	28.6483	28.4256	28.851	28.5653	28.528	0.0419723	0.0816738	-0.20463
Apex1	P28352	28.1261	28.0125	28.1924	28.0529	28.0431	28.2593	27.8409	27.9148	27.8353	28.0911	27.8814	27.8949	0.00396133	0.0110606	-0.204633
Hnrnpul2	Q00PI9	28.5062	28.418	28.5711	28.4852	28.4365	28.4081	28.2396	28.3145	28.1178	28.4423	28.2729	28.2088	0.00253016	0.00756336	-0.204869
Tpi1	P17751	33.2389	33.1298	33.1724	33.0715	33.048	33.1272	32.9817	32.88	32.8825	33.0498	32.9517	32.8092	0.0010201	0.00353966	-0.205475
Fermt3	Q8K1B8	29.7154	29.6506	29.8454	29.703	29.741	29.7459	29.4114	29.5348	29.4827	29.7964	29.5145	29.4273	0.00846323	0.0212374	-0.205719
Mrpl1	Q99N96	26.0532	26.045	26.223	26.1389	26.2419	26.1194	25.8952	25.9744	25.9379	25.8478	26.0195	25.9121	0.000608186	0.00234376	-0.205744
Snx4	Q91YJ2	25.3297	25.252	25.3619	25.0138	25.2296	25.1039	25.0717	25.115	24.8016	25.0867	25.0575	24.9217	0.0189988	0.0418099	-0.206144
Vapb	Q8BH80	28.3726	28.1354	28.3452	28.2577	28.2186	28.397	28.0483	28.0901	27.9945	28.3629	28.0032	27.9807	0.0162259	0.0364265	-0.20781
Cops3	O88543	27.1192	26.9291	27.1332	26.7914	27.0904	27.0036	26.8364	26.9157	26.7253	26.8545	26.8785	26.6087	0.0157397	0.0355019	-0.207967
Lrpprc	Q6PB66	30.0267	29.9559	30.0962	29.9575	30.0624	29.9933	29.7473	29.8787	29.6704	29.982	29.8204	29.7415	0.00223777	0.00683804	-0.208645
Lamp1	P11438	29.4493	29.5999	29.5283	29.6339	29.4241	29.5576	29.0021	29.3871	29.407	29.46	29.3613	29.3199	0.0190651	0.0419023	-0.209274
Pmpcb	Q9CXT8	27.4338	27.6231	27.7086	27.4823	27.4606	27.6663	27.4468	27.1831	27.2069	27.3533	27.3892	27.5332	0.0168604	0.0376238	-0.210374
Macf1	F7ACR9	28.1324	28.1403	28.1889	28.3036	28.0366	28.0501	28.1035	27.8942	27.8635	27.9896	27.9847	27.7509	0.00798367	0.0201855	-0.210918
Rbmxl1	Q91VM5	29.8512	29.771	29.8791	29.6808	29.903	29.87	29.3633	29.7614	29.6497	29.5502	29.7295	29.6282	0.0109207	0.026205	-0.212135
Coro7	Q9D2V7	27.0989	27.0746	26.8502	27.0285	27.2129	26.8618	26.8215	27.0552	26.8043	26.5738	26.8428	26.7547	0.0326539	0.0661984	-0.212446
Hist1h1c	P15864	33.4263	33.4527	33.3824	33.4252	33.3951	33.4371	33.332	33.1555	33.0693	33.3228	33.1535	33.2102	0.000645103	0.00245684	-0.212568
Mcm5	Q52KC3	28.2986	28.3104	28.3662	28.3683	28.3515	28.3585	28.111	28.2128	28.0218	28.2428	28.2219	27.9667	0.00141025	0.00457991	-0.212754
Capg	Q99LB4	31.9682	31.9591	31.8994	31.9395	31.8786	31.9243	31.637	31.7476	31.736	31.7223	31.8595	31.5868	0.000415207	0.00169374	-0.213303
Fen1	Q91Z50	28.4203	28.3639	28.529	28.5409	28.6571	28.5372	28.1958	28.2941	28.3318	28.3824	28.3229	28.2305	0.00168453	0.00535113	-0.215135
Myo1g	Q5SUA5	27.392	27.5745	27.646	27.7375	27.7037	27.799	27.3455	27.4577	27.4289	27.4827	27.3183	27.5091	0.00843035	0.0211867	-0.218395
Bcat2	O35855	28.7152	28.6724	28.7379	28.7942	28.6563	28.7701	28.5551	28.5113	28.58	28.3458	28.5525	28.4887	0.000334661	0.00140105	-0.218784
Fubp1	Q3TUE1	28.5657	28.5209	28.4975	28.4247	28.3848	28.5061	28.1121	28.3745	28.2571	28.2485	28.267	28.3237	0.000661741	0.00250439	-0.219456
Sumo1	P63166	26.5411	26.5862	26.5986	26.5113	26.5885	26.4916	26.2194	26.5568	26.2213	26.2256	26.2846	26.4848	0.00617175	0.0161411	-0.220787
Cops4	O88544	28.0963	28.0148	28.0437	28.0118	27.9524	27.9986	27.7226	27.863	27.8634	27.8255	27.7828	27.7253	4.63878e-05	0.000273181	-0.222517
Lrpap1	P55302	28.5311	28.5407	28.6764	28.4624	28.476	28.5439	28.4464	28.3391	28.2833	28.3487	28.2113	28.2612	0.000625998	0.00239858	-0.223427
Hcfc1	Q61191	27.2396	27.2607	27.4847	27.1322	27.3438	27.1437	27.2477	26.9476	27.0539	26.9859	26.971	27.0492	0.00929935	0.0229906	-0.224891
Tsfm	Q9CZR8	27.7615	27.6703	27.8711	27.8803	27.7558	27.7069	27.5646	27.6734	27.493	27.4947	27.3812	27.6849	0.00339247	0.00975735	-0.225701
Ogdh	Q60597	29.7531	29.7491	29.8217	29.7069	29.8108	29.7661	29.4805	29.5668	29.5571	29.5169	29.476	29.6522	3.42195e-05	0.000213553	-0.226374
Arpc5	Q9CPW4	29.2345	29.0194	29.1949	29.0763	28.9598	29.1552	28.8182	28.866	28.8692	28.9954	28.8225	28.9095	0.00125947	0.00419065	-0.226552
Ncf2	O70145	28.6721	28.5936	28.7751	28.5953	28.6457	28.6333	28.3436	28.3766	28.3764	28.6041	28.5078	28.3362	0.00132727	0.00435692	-0.228424
Prpsap1	B1AT82	26.5157	26.5117	26.2489	26.4861	26.7817	26.5281	26.3947	26.1071	26.4223	26.4566	26.0696	26.2404	0.0392694	0.077197	-0.230261
Erp44	Q9D1Q6	27.629	27.77	27.8433	27.5711	27.6477	27.6966	27.3037	27.4101	27.374	27.6214	27.5777	27.489	0.00505321	0.0135837	-0.230324
Nasp	B1AU76	28.7211	28.7136	28.6748	28.6351	28.7084	28.6726	28.4792	28.3509	28.4291	28.6456	28.495	28.3425	0.000679232	0.00255572	-0.230532
Hist1h1d	P43277	31.6212	31.6138	31.5266	31.4625	31.5608	31.5544	31.4829	31.2314	31.2534	31.3132	31.2525	31.4217	0.000781523	0.00284461	-0.230687
Adh5	P28474	29.0874	29.0765	29.1405	29.1797	29.0989	29.1097	28.8825	28.8622	28.8566	28.9192	28.9304	28.8542	5.74929e-07	7.45403e-06	-0.231265
Myo5a	D3YZ62	27.3489	27.1658	27.0629	27.0964	27.1879	27.1155	26.9576	26.9973	26.7497	27.0592	26.9834	26.8411	0.00407665	0.0113071	-0.231504
Acads	Q07417	27.9061	27.9564	27.9383	27.9021	28.1022	28.055	27.5562	27.7659	27.7174	27.7102	27.8703	27.8283	0.00188091	0.00589105	-0.235287
Pck2	Q8BH04	29.227	29.2046	29.3475	29.2306	29.358	29.2869	29.0112	28.9675	28.988	29.2268	28.9567	29.0876	0.000790191	0.00286991	-0.236156
Atp6v1f	Q9D1K2	27.0403	27.3013	27.1785	27.237	27.2503	27.2549	26.9487	27.1028	27.0099	26.8419	26.8911	27.0457	0.00152109	0.00487826	-0.237042
Prep	Q9QUR6	29.8437	29.7072	29.8949	29.8284	29.9675	29.8108	29.5076	29.5763	29.6009	29.7598	29.6867	29.4978	0.00150377	0.00484596	-0.237228
Wars	P32921-2	27.896	27.6639	28.05	27.9292	27.8226	27.8488	27.4986	27.5401	27.5856	27.8227	27.5619	27.7709	0.0101444	0.0246505	-0.238422
Mrps23	Q8VE22	26.0679	25.8802	25.7571	25.94	25.9228	25.9903	25.2913	25.6631	25.6356	25.9402	25.8471	25.7491	0.0403832	0.0788568	-0.238667
Pitrm1	Q8K411-2	29.2815	29.1528	29.2268	29.1491	29.2426	29.2127	28.9357	29.044	28.8944	28.8602	28.963	29.129	0.000386137	0.00158094	-0.239866
Mcm7	Q61881	28.2812	28.2759	28.3478	28.3954	28.3648	28.2821	27.9943	28.1835	28.0129	28.1594	28.0597	28.0975	8.23512e-05	0.000439338	-0.239989
Gpi1	P06745	31.8476	31.8578	31.8301	31.8373	31.814	31.7986	31.6536	31.5495	31.613	31.6991	31.84	31.188	0.0238095	0.050375	-0.240371
Mvp	E9Q3X0	29.609	29.5197	29.6385	29.527	29.5325	29.4718	29.4126	29.237	29.2934	29.3678	29.2008	29.3394	0.000167102	0.000788372	-0.241215
Cpsf3	Q9QXK7	26.0733	25.8794	26.1146	26.0445	26.0988	26.1594	26.0443	25.7828	25.6756	26.1478	25.7198	25.55	0.0389027	0.0767272	-0.241624
Atp6v1a	P50516	30.8963	30.9547	31.0125	30.9879	30.9795	30.9566	30.7474	30.7018	30.7697	30.7471	30.6853	30.6833	6.90643e-07	8.78403e-06	-0.242165
Stip1	Q60864	31.5315	31.4485	31.539	31.5732	31.5449	31.4518	31.1357	31.204	31.1965	31.3568	31.3027	31.4375	0.000771172	0.00281305	-0.242619
Galk2	Q68FH4	27.1951	27.2454	27.1374	27.001	26.9665	27.3567	27.1613	26.9226	26.8502	26.8525	26.8277	26.831	0.0127416	0.0296947	-0.242797
Vat1	Q62465	29.3881	29.423	29.3966	29.5423	29.6214	29.4235	29.2786	29.2788	29.2664	29.114	29.226	29.1692	0.000437415	0.00177137	-0.24364
Sdha	Q8K2B3	30.7833	30.7267	30.8321	30.7253	30.7572	30.7887	30.5266	30.5401	30.5263	30.4931	30.5225	30.5365	9.26132e-08	1.89053e-06	-0.244685
Myof	E9Q390	27.2416	27.1926	27.3002	27.079	27.1259	27.0849	27.1855	26.9303	26.8833	26.946	26.6832	26.925	0.00842504	0.0211867	-0.245132
Atp6v1h	A0A0A6YX18	28.3891	28.251	28.3714	28.3535	28.413	28.4815	28.0742	28.1576	28.1972	28.0588	28.1457	28.1362	6.13142e-05	0.000344699	-0.248279
Chmp4b	Q9D8B3	28.8157	28.4235	28.808	28.5636	28.6765	28.6298	28.335	28.2485	28.5015	28.4194	28.257	28.649	0.0171847	0.0382709	-0.251122
Dhrs1	Q99L04	26.7698	26.8028	26.9519	26.7015	26.7992	26.6514	26.5959	26.5704	26.45	26.6866	26.41	26.4555	0.00198004	0.00613333	-0.251383
Ap1g1	Q8CBB7	26.4925	26.1762	26.3791	26.5405	26.6034	26.4812	26.0132	26.3011	26.0585	26.5091	26.1366	26.14	0.0264021	0.0550936	-0.252425
Epb41l2	O70318	28.4739	28.1873	28.4028	28.331	28.5208	28.3859	28.1006	28.136	28.0357	28.3558	28.2034	27.9518	0.0068128	0.0175569	-0.253055
Mrps16	Q9CPX7	24.8306	24.7155	24.8431	24.9163	24.5453	24.7712	24.5894	24.6394	24.447	24.7214	24.3882	24.314	0.0123802	0.0289945	-0.253801
Maoa	Q64133	26.8663	26.6641	26.7234	26.7451	26.7888	26.8425	26.3782	26.3546	26.4237	26.8025	26.7015	26.446	0.0116231	0.0275349	-0.25395
Gps1	Q3MIA8	26.5211	26.6752	26.8429	26.9973	26.7262	26.8114	26.4894	26.674	26.347	26.5494	26.58	26.4049	0.0112065	0.0267563	-0.254906
Vps35	Q9EQH3	30.306	30.0923	30.2538	30.2417	30.2535	30.3119	29.8515	30.0088	29.9203	30.2388	30.0329	29.8771	0.0032814	0.00947865	-0.254988
Trmt112	Q8VCR4	26.8777	26.9595	26.9028	26.5371	26.5542	26.7648	26.38	26.6675	26.7058	26.6034	26.3855	26.3123	0.0298426	0.0611795	-0.256911
Fam120a	Q6A0A9	27.7251	27.7518	27.8914	27.6505	27.6722	27.8561	27.4273	27.5828	27.5438	27.6246	27.341	27.4675	0.00127438	0.00422479	-0.259992
Sgpl1	Q8R0X7	28.2378	28.1645	27.9705	28.1419	28.3251	28.267	27.9373	27.9321	27.9872	27.884	27.8633	27.9417	0.00069727	0.0025944	-0.260217
Clint1	Q5SUH7	26.8295	26.3477	26.9249	26.8893	26.9844	26.9135	26.4363	26.6454	26.6339	26.497	26.4203	26.6869	0.0342556	0.0687111	-0.261585
Rdh11	Q9R1R8	26.0571	25.8306	25.7921	25.8208	25.8764	25.9018	25.5285	25.6502	25.3917	25.9033	25.6995	25.5265	0.00939257	0.0231868	-0.263204
Hist1h2al	F8WIX8	33.5879	33.4689	33.6953	33.3517	33.2988	33.6098	33.2015	33.3456	33.2854	33.2993	33.0252	33.2745	0.00750709	0.019096	-0.263509
Fau	Q642K5	28.3691	28.1226	27.894	28.4365	28.0133	28.1897	27.865	27.9923	27.8699	27.9463	27.9385	27.8286	0.0134368	0.0310831	-0.264096
Myo1f	Q8CG29	27.9187	27.8896	27.9075	27.785	27.8679	28.0741	27.6318	27.6421	27.5677	27.8805	27.6598	27.4633	0.00293789	0.0086204	-0.266263
Uqcrq	Q9CQ69	26.1779	26.5684	26.6854	26.2146	26.3485	26.5183	26.3038	26.3505	26.2438	25.8909	26.0987	26.0235	0.0363291	0.0724386	-0.266976
2019-03-02	Q922Q1	25.7439	25.6766	25.796	25.5293	25.8319	25.8662	25.6163	25.413	25.3516	25.4405	25.5635	25.4506	0.00194962	0.00606649	-0.268032
Ppp6r3	G5E8R4	26.4416	26.3185	26.3938	26.4471	26.6611	26.6632	26.2714	26.2978	26.086	26.3786	26.121	26.1607	0.00490058	0.013209	-0.268287
Rps19	Q9CZX8	31.2396	31.2061	31.2475	31.1828	31.2024	31.2179	30.9666	30.7645	30.9854	31	30.9105	31.0581	8.95894e-05	0.000468244	-0.268519
Dpm3	Q9D1Q4	24.5519	24.4866	24.7802	24.6065	24.7776	24.8084	24.2996	24.6643	24.2302	24.2761	24.3591	24.5692	0.0145093	0.0331441	-0.268779
Hsd17b10	Q99N15	28.9468	28.9754	29.1083	28.894	29.0219	29.0257	28.5272	28.7489	28.7084	28.8476	28.7001	28.8243	0.0006824	0.00256187	-0.269258
Reep5	G3X8R0	26.2111	26.3855	26.756	26.5342	26.5435	26.5183	26.123	26.1067	26.1816	26.5402	26.0358	26.3438	0.0298571	0.0611795	-0.269563
Cnpy2	Q9QXT0	27.1992	27.1166	27.3123	27.0375	27.3156	27.1048	26.8418	26.9395	26.8547	26.9703	26.9554	26.8893	0.000375212	0.00154187	-0.272513
Isoc2a	P85094	27.2781	27.0735	26.9373	27.002	27.1796	27.1664	27.067	26.7007	27.0118	26.5275	26.8515	26.8421	0.0176068	0.0391067	-0.272704
Rps2	P25444	31.6864	31.5688	31.7241	31.5414	31.577	31.6793	31.2557	31.21	31.3167	31.4504	31.3942	31.51	0.000686348	0.00256805	-0.273335
Atp1b3	P97370	28.7664	28.884	28.9423	28.8851	29.0198	28.8847	28.4024	28.7077	28.5769	28.7823	28.565	28.7072	0.00188938	0.00591205	-0.273473
Slc25a4	P48962	29.2308	29.017	29.1371	29.2212	29.3608	29.3443	28.7471	29.0255	28.9227	29.158	28.8913	28.9207	0.00520977	0.0139637	-0.274318
Hsd17b11	Q9EQ06	26.1218	26.0497	26.1369	26.1981	26.3669	26.2343	25.9668	25.881	25.8598	25.8563	25.9203	25.9757	0.000253978	0.00112673	-0.274612
Polr2b	Q8CFI7	26.4451	26.4322	26.4491	26.546	26.7108	26.2862	25.9328	26.2548	26.0983	26.3605	26.467	26.1056	0.018911	0.041644	-0.275073
Gnai2	P08752	29.9147	29.8954	29.9886	29.8994	29.9841	29.9411	29.4761	29.7363	29.6389	29.8224	29.6949	29.5972	0.000325916	0.00138357	-0.276246
Trappc3	O55013	26.4079	26.5701	26.551	26.4639	26.5018	26.254	26.053	26.2717	26.1217	26.1187	26.2719	26.2502	0.00110104	0.00375813	-0.276914
Mki67	E9PVX6	29.3714	29.3846	29.3875	29.2966	29.2933	29.4009	29.062	29.1703	28.8896	29.195	29.1191	29.0321	0.000221982	0.00100342	-0.277695
Yars	A2A7S7	29.385	29.3834	29.4796	29.3514	29.3717	29.411	29.1163	29.0707	29.144	29.2057	29.0807	29.0975	1.38483e-06	1.48947e-05	-0.277872
Atp2b1	G5E829	27.8954	27.8021	27.642	27.6966	27.8061	27.7932	27.4937	27.6415	27.3406	27.6246	27.4681	27.3961	0.00107862	0.00370049	-0.278446
Hibadh	Q99L13	26.8192	27.1338	27.1513	26.9982	27.0459	26.8839	26.8038	26.8116	26.6806	26.5352	26.6672	26.8573	0.00343413	0.00986024	-0.279431
Atp6v1d	P57746	27.3173	27.2036	27.2802	27.2594	27.3852	27.2289	26.9449	26.8135	26.7753	27.1999	27.0506	27.2131	0.00627775	0.0163799	-0.279559
Ap1m1	P35585	26.4977	26.5482	26.5504	26.4995	26.6946	26.4396	26.3279	26.2911	26.0071	26.495	26.3606	26.0695	0.007307	0.0186579	-0.279826
Ipo5	Q8BKC5	29.9091	29.9323	30.0802	30.0893	30.0744	29.9947	29.7106	29.6722	29.7387	29.942	29.7683	29.5692	0.000879871	0.00314441	-0.279856
Gatad2b	A1L3S7	25.566	25.6684	25.6678	25.4583	25.6752	25.7938	25.0874	25.5809	25.3785	25.08	25.5916	25.431	0.0227664	0.0484914	-0.280022
Ube2v1	Q9CZY3	28.2628	28.4315	28.532	28.2436	28.3231	28.1378	27.9183	28.0177	27.9435	28.3209	28.0774	27.9696	0.00727991	0.018603	-0.280586
Mrps11	Q3U8Y1	24.8458	24.9626	25.5306	25.0163	25.2168	25.0944	24.7285	24.9188	24.5642	24.8705	24.9331	24.9663	0.0369066	0.0734262	-0.280838
Ube2n	P61089	28.5019	28.6111	28.4867	28.6921	28.5646	28.2858	28.3578	28.2468	28.3624	28.1438	28.2707	28.0626	0.00350406	0.0100217	-0.283035
Gsdmd	Q9D8T2	26.4128	26.3024	26.3492	26.3435	26.4712	26.5123	26.1668	26.079	26.1837	26.2711	26.0386	25.9516	0.00058752	0.00227724	-0.283409
Srsf4	Q542V3	25.0142	24.8448	25.1945	24.9304	25.043	25.1671	24.7958	24.7983	24.4319	24.7042	24.8446	24.9188	0.00952145	0.0234232	-0.283413
Colgalt1	Q8K297	27.8821	27.9335	27.9546	27.9017	27.7869	27.9229	27.5879	27.691	27.4526	27.5709	27.6993	27.6743	0.000101577	0.000521928	-0.284295
Eif4h	Q9WUK2-2	29.4624	29.5219	29.3585	29.381	29.335	29.4308	29.1208	29.1065	29.0881	29.2026	29.1637	29.0835	8.12203e-06	6.41351e-05	-0.287434
Mrps30	Q9D0G0	25.8305	25.9404	25.8683	26.272	26.1094	26.1644	25.6847	25.8907	25.7622	25.831	25.6956	25.5907	0.0067607	0.0174361	-0.288365
Acot9	Q9R0X4	26.7161	26.7042	26.7717	26.8115	26.7566	26.9303	26.3297	26.7489	26.3162	26.6836	26.4293	26.4519	0.00538379	0.014389	-0.288445
Mrps17	D3Z198	25.3272	24.9825	25.2513	25.496	25.2572	25.1531	24.6367	25.1683	25.0198	25.2906	24.8652	24.7558	0.0418149	0.0814148	-0.288508
Snrpc	Q62241	26.5566	26.5813	26.7189	26.521	26.7655	26.6153	26.1193	26.4369	26.1254	26.3825	26.249	26.7141	0.0162527	0.0364623	-0.288565
Rp2	Q9EPK2-4	25.7584	25.7389	25.5688	25.5398	25.5776	25.7089	25.5445	25.271	25.3411	25.6482	25.0432	25.3087	0.0129127	0.0300369	-0.289298
Dctn2	Q99KJ8	28.0584	27.8155	27.9196	27.7176	27.6457	27.8532	27.5574	27.4843	27.6799	27.6836	27.4438	27.42	0.00346145	0.00992838	-0.290166
Pole3	Q9JKP7	24.8393	24.6859	24.8123	24.8337	24.7213	24.6442	24.5287	24.6702	24.2013	24.6599	24.3694	24.3501	0.00578365	0.0153363	-0.292846
Atp6v1c1	Q9Z1G3	28.8082	28.6674	28.701	28.6836	28.7187	28.8104	28.4654	28.447	28.4273	28.6007	28.3873	28.3036	0.000105497	0.000537117	-0.292988
Lamp2	P17047-3	29.4539	29.3466	29.4841	29.4543	29.5927	29.5311	29.1099	29.1741	29.1112	29.3696	29.1517	29.1823	0.00020828	0.000953073	-0.293957
Lap3	Q9CPY7-2	29.1743	29.0907	29.1497	29.1202	29.1559	29.1056	28.8022	28.7567	28.7804	28.9019	28.8426	28.9479	4.48659e-06	4.00204e-05	-0.294122
Tmcc1	F8WJ98	25.4677	25.3407	25.8472	25.3113	25.5745	25.3456	25.1009	25.2588	25.0251	25.3293	25.4157	24.9798	0.0227426	0.0484856	-0.296215
Alyref	O08583	28.4376	28.8083	28.4144	28.5889	28.0221	28.2908	28.3147	28.2296	28.171	27.8464	27.979	28.2424	0.0472915	0.0903426	-0.296505
Fam63a	Q76LS9-2	26.7623	26.6862	27.0253	26.7114	26.7259	26.8069	26.3221	26.3739	26.3209	26.8723	26.5757	26.4734	0.0143199	0.0328107	-0.296588
Mrps9	Q9D7N3	25.7912	25.8821	25.8683	26.2082	25.9116	26.1361	25.5712	25.7975	25.8765	25.9097	25.5993	25.2539	0.0338506	0.0681289	-0.298218
Atp5k	Q06185	27.5922	27.2579	27.4386	27.2649	27.4897	27.3269	26.9333	27.2234	27.0779	27.2985	26.9297	27.1169	0.00458038	0.012416	-0.29842
Tkt	P40142	32.7803	32.8368	32.8586	32.8177	32.8284	32.8758	32.5916	32.4803	32.4877	32.5494	32.5692	32.5254	1.20192e-07	2.26859e-06	-0.298964
Atp6v0a1	K3W4T3	28.2239	28.0996	28.1334	28.138	28.2666	28.1715	27.747	27.9982	27.8009	27.9698	27.968	27.7474	0.000273159	0.00119128	-0.300288
Adk	P55264	28.2909	28.2859	28.216	28.3215	28.1867	28.1197	28.064	27.9156	27.9726	27.9279	27.937	27.8001	7.6808e-05	0.000415723	-0.300552
Plxnb2	B2RXS4	27.4811	27.3014	27.2965	27.3361	27.3605	27.4642	27.2431	27.3433	26.9953	27.1902	26.9504	26.6979	0.0137241	0.0315946	-0.303269
Sf3b4	Q8QZY9	25.9338	25.9092	25.4573	25.9469	25.9402	25.8918	25.3467	25.75	25.6888	25.6401	25.4368	25.3884	0.0158136	0.0356126	-0.304762
Fh1	P97807-2	29.8729	30.0558	30.0096	30.1868	30.0851	30.0421	29.7341	29.6631	29.7852	29.4729	29.7934	29.9635	0.00291739	0.00857529	-0.306685
Prdx1	P35700	33.4076	33.378	33.451	33.3916	33.326	33.4057	33.0629	32.9744	33.0517	33.0704	33.0393	33.3189	0.000136956	0.000666839	-0.307043
Lamtor3	O88653	27.3827	27.1518	27.3475	27.1317	27.1665	27.2319	26.972	26.8465	26.896	27.0253	26.9637	26.8655	0.000148621	0.000715304	-0.307199
Dap3	G3X9M0	26.2541	26.0046	25.4984	25.8454	26.088	25.9691	25.7815	25.684	25.6662	25.5629	25.679	25.4397	0.0236603	0.0501226	-0.307684
Lgals1	P16045	31.7916	31.7653	31.8582	31.7287	31.6631	31.706	31.2896	31.488	31.4514	31.5791	31.4827	31.3705	0.00010271	0.000525326	-0.308595
Soat1	Q61263	28.1723	28.032	28.2191	28.0535	28.1416	27.9815	27.6043	27.7612	27.7547	27.8926	27.8626	27.8726	0.000339882	0.00141759	-0.308654
Ybx3	Q9JKB3	27.4064	27.3704	27.3109	27.269	27.2385	27.0098	26.7268	27.1033	27.0498	26.8491	26.9573	27.0612	0.00378636	0.0106701	-0.309595
Atp5j	P97450	28.8666	28.8192	28.9803	28.784	29.0573	28.8882	28.4616	28.7784	28.3119	28.7529	28.6361	28.5804	0.00391327	0.0109631	-0.312399
Prps2	Q9CS42	25.4939	25.5337	25.776	25.4414	25.7279	25.4022	25.3928	24.9704	25.209	25.3591	25.1408	25.4275	0.00845286	0.0212273	-0.312603
Rps16	P14131	31.1839	31.2259	31.2601	31.1904	31.209	31.2584	30.9384	30.7595	30.8129	31.02	30.9804	30.9406	2.85571e-05	0.000184408	-0.312649
Timm9	Q9WV98	27.7601	27.5544	27.7713	27.6252	27.3936	27.5943	27.3111	27.423	27.0269	27.4885	27.1969	27.3711	0.0056537	0.0150686	-0.313557
Psip1	Q99JF8	27.5221	27.5322	27.5377	27.5048	27.6253	27.6488	26.9847	27.4349	27.2834	27.1565	27.4107	27.2067	0.00150609	0.00484878	-0.315652
Rap1a	P62835	25.0869	25.2466	25.1507	24.8926	24.8754	25.1717	24.8396	24.7043	24.8198	24.8251	24.6648	24.6741	0.00123075	0.00412098	-0.316051
Hk3	Q3TRM8	30.1771	30.1679	30.2628	30.0651	30.1138	30.1239	29.8384	29.8193	29.7396	29.938	29.8518	29.8132	8.12953e-06	6.41351e-05	-0.318404
Dnmt1	P13864	28.8566	28.7073	28.9254	28.7228	28.6652	28.7373	28.4247	28.3717	28.3527	28.6515	28.4447	28.4585	0.00032922	0.00139189	-0.318456
Ilf3	Q9Z1X4	27.839	27.7715	27.6885	27.5373	27.651	27.6734	27.2087	27.5073	27.3865	27.3336	27.3838	27.4196	0.000274446	0.00119424	-0.320189
Hspa5	P20029	34.0958	34.0869	34.1344	34.058	33.9969	34.0922	33.7267	33.7543	33.702	33.7715	33.7061	33.8815	2.1798e-06	2.17655e-05	-0.320349
Hmha1	G3X9Q3	26.5569	26.3275	26.7158	26.6122	26.6277	26.4551	26.1144	26.1677	26.0316	26.563	26.2056	26.2634	0.00615052	0.0161108	-0.324904
Ap1b1	O35643	29.3924	29.2818	29.3914	29.3685	29.5545	29.484	28.9349	29.1276	29.0813	29.2283	29.0989	29.0517	0.000153174	0.000732998	-0.32495
Hars2	G5E823	27.5423	27.4985	27.583	27.6395	27.6817	27.4404	27.265	27.1521	27.1677	27.3554	27.3116	27.1825	6.96399e-05	0.000381878	-0.325203
Aco2	Q99KI0	30.9805	30.9468	31.0262	30.942	31.0087	30.9758	30.6112	30.6664	30.6533	30.6485	30.675	30.6708	2.57837e-09	1.91659e-07	-0.325781
Prkcsh	O08795	28.9669	28.921	28.9617	28.858	28.893	28.9709	28.5298	28.5709	28.5261	28.8262	28.5657	28.5889	6.26594e-05	0.000350757	-0.327332
Rab31	Q3TXV4	26.6996	26.578	26.7274	26.8028	26.7996	26.827	26.2781	26.5733	26.1792	26.631	26.3431	26.4584	0.00227109	0.00690616	-0.328553
B4galt5	Q9JMK0	23.5881	23.8523	23.8671	23.7239	23.6398	24.0288	23.2659	23.4343	23.4728	23.5451	23.2673	23.7314	0.00725707	0.0185872	-0.330536
Mut	P16332	26.8118	26.7656	26.7108	26.6808	26.7295	26.7991	26.0971	26.3417	26.4	26.9489	26.3838	26.3397	0.0179518	0.0398202	-0.331068
Myo9b	E9QKV6	26.3391	26.5376	25.9944	26.1969	26.3266	26.452	25.9229	26.0886	25.6536	26.2381	25.9771	25.9665	0.0136531	0.0315181	-0.333282
Mtap	Q9CQ65	29.5378	29.5142	29.6052	29.5203	29.5651	29.5669	29.3159	29.1095	29.1242	29.3211	29.1482	29.2905	1.7129e-05	0.00011876	-0.333368
Top2b	Q64511	27.9082	27.8836	28.0592	27.9967	27.8473	27.9872	27.7091	27.696	27.2048	27.8015	27.6532	27.5869	0.00418995	0.0115639	-0.33842
S100a10	P08207	28.281	28.3271	28.4392	28.1291	28.1589	28.1112	27.7271	28.0208	27.8494	28.0217	27.9215	27.8686	0.000681921	0.00256187	-0.339588
Inpp5d	Q9ES52-3	27.943	27.6954	27.8448	27.9229	28.0308	27.9466	27.6479	27.5249	27.5506	27.6645	27.5079	27.4481	0.000164061	0.000777312	-0.339914
Scamp1	Q3TSA8	25.4099	25.2811	25.3554	25.1598	25.171	25.3445	24.6508	24.7999	24.9535	25.0334	25.0099	25.2347	0.00426648	0.0117363	-0.339919
Uqcrb	Q9CQB4	25.9154	25.7171	26.2331	26.0976	26.2407	26.3451	25.756	25.6311	25.6876	25.7565	25.6041	26.0735	0.0167369	0.037448	-0.34005
Cotl1	Q9CQI6	30.0904	30.1017	30.0991	30.0665	30.0874	30.0855	29.75	29.7334	29.7613	29.7998	29.8039	29.6404	8.404e-08	1.79053e-06	-0.340343
Mrpl14	Q9D1I6	23.9878	23.6419	24.2277	24.2046	23.7122	24.245	23.8944	23.7333	23.6865	23.5333	23.4744	23.6481	0.0219456	0.0471774	-0.341537
Arpc3	Q9JM76	29.277	29.4651	29.3819	29.3185	29.2765	29.3467	28.8709	28.917	28.937	28.9873	28.9959	29.3077	0.000659379	0.00250071	-0.341641
Trappc5	Q9CQA1	23.5853	23.0777	22.9399	23.3211	23.842	23.458	23.006	23.2488	23.1598	23.0794	22.7468	22.9209	0.0494085	0.0934632	-0.343739
Cnbp	P53996-2	29.7539	29.7576	29.8505	29.5667	29.4803	29.5831	29.3323	29.2887	29.3265	29.1621	29.3025	29.5112	0.000896445	0.00318324	-0.344775
Pigs	Q6PD26	24.2029	24.013	24.277	24.5203	24.3803	24.3658	24.1993	23.9946	23.5309	23.8417	23.9037	24.2139	0.0204862	0.0445052	-0.345856
Rps20	P60867	30.6483	30.6384	30.7214	30.7395	30.4678	30.7396	30.364	30.2356	30.1831	30.4876	30.2249	30.3839	0.000297261	0.00127643	-0.346004
Ecd	Q9CS74	27.5596	27.426	27.2323	27.0551	26.6859	27.1726	26.843	26.8473	26.8704	26.6203	26.6845	27.1868	0.0416432	0.0811278	-0.346538
Mrps18b	Q99N84	26.1563	26.0119	25.8721	25.9235	25.8134	25.9968	25.7922	25.6107	25.4662	25.7695	25.5846	25.4634	0.00103959	0.00359239	-0.347871
Uqcrh	P99028	28.2025	28.2683	28.3391	28.0689	28.31	28.1976	27.6167	27.9657	27.7126	28.1938	27.8408	27.9654	0.00379499	0.0106764	-0.348557
Ide	F6RPJ9	29.2703	29.2951	29.2807	29.2487	29.2565	29.2941	28.8721	28.9331	28.9122	29.1192	29.0028	28.6992	0.000116534	0.000579207	-0.351139
Hist1h1b	P43276	31.0709	31.0117	30.9803	31.0587	31.0703	31.0889	30.9047	30.6105	30.6333	30.8046	30.5518	30.6597	0.000102645	0.000525326	-0.352698
Pon2	Q62086	25.356	25.5745	25.5858	25.8142	26.1883	25.7819	25.2642	25.656	25.7358	25.1658	25.2277	25.1342	0.0494279	0.0934632	-0.352848
Cbx5	Q61686	27.1182	26.8992	26.8845	27.0016	27.0742	26.9892	26.5508	26.7216	26.5479	26.8763	26.7432	26.405	0.00119447	0.00400754	-0.353687
Ewsr1	Q5SUT0	26.8679	26.7036	26.9285	26.8143	26.7119	26.7275	26.1386	26.5467	26.3191	26.3905	26.5064	26.7256	0.00298696	0.00874903	-0.354456
P4hb	P09103	32.2418	32.2264	32.1718	32.1692	32.1934	32.2663	31.8489	31.8337	31.8619	31.8706	31.7538	31.9714	7.84845e-07	9.79592e-06	-0.354775
Cdk1	P11440	28.0824	28.0909	27.8978	28.0316	28.0166	28.0341	27.8551	27.6388	27.6486	27.9277	27.6108	27.3402	0.00257379	0.00765274	-0.355384
Slc25a11	Q9CR62	27.7007	27.3895	27.8507	27.7247	27.8579	27.8528	27.0393	27.5507	27.2243	27.6948	27.4154	27.3036	0.0142098	0.0326006	-0.358071
Itgam	Q3U1U4	29.2614	29.2525	29.343	29.2905	29.3066	29.3815	28.9601	28.8907	28.8983	29.054	28.9831	28.8804	9.45571e-07	1.12161e-05	-0.361502
Emb	P21995	26.3169	26.2192	26.2629	26.1016	26.3637	25.8408	25.9495	25.8202	25.5837	25.973	25.753	25.8372	0.00373839	0.0105527	-0.36476
Mlec	Q6ZQI3	26.6186	26.4975	26.5849	26.5304	26.6352	26.6549	26.0981	26.4423	25.9646	26.5886	26.2079	26.0266	0.0054654	0.0145904	-0.365574
Map4	A0A0B4J1F2	26.3324	25.9723	26.1894	25.9584	25.7333	25.7208	25.6863	25.5852	25.7418	25.4428	25.3086	25.9459	0.0223401	0.0478104	-0.366
Pgpep1	Q9ESW8	25.1951	25.0998	25.2613	24.9533	25.2124	25.3065	24.4232	24.6625	24.6798	25.4624	24.8064	24.7964	0.0369436	0.0734262	-0.366271
Akr1e1	Q9DCT1	24.8063	24.555	24.8929	24.7685	24.4225	24.8376	24.7808	24.1413	24.107	24.3983	24.1781	24.4782	0.0180463	0.0399766	-0.366524
Wdr26	Q8C6G8	27.0705	26.8507	27.167	27.1741	27.2264	27.1656	26.6787	26.6714	26.5986	26.9447	26.6644	26.8947	0.00101414	0.00352263	-0.366953
Spag9	Q58A65-5	26.304	26.2162	25.9661	25.94	26.293	26.305	25.5989	25.4997	26.1055	25.7409	25.8073	26.0609	0.012657	0.0295243	-0.3685
Sec24c	G3X972	25.9361	25.9538	25.5974	25.6381	26.0671	25.944	25.7613	25.1583	25.6782	25.6038	25.4944	25.2253	0.0157057	0.0354634	-0.369209
Prrc2c	S4R2J9	27.6464	27.3244	27.4205	27.3742	27.3126	27.2111	27.0333	26.8071	26.9959	26.9103	27.1172	27.202	0.00125484	0.00418071	-0.370538
Hk1	P17710-3	29.4707	29.3217	29.4873	29.4505	29.3618	29.4457	28.7471	29.1226	28.9601	29.249	29.0449	29.1893	0.000827251	0.00298506	-0.370784
Trpv2	Q9WTR1	26.8162	26.6971	26.6144	26.864	27.058	26.9833	26.5575	26.3642	26.3303	26.4621	26.4528	26.641	0.00123712	0.00413816	-0.370823
Uap1l1	Q3TW96	29.4766	29.3708	29.4427	29.3623	29.4695	29.4394	29.1033	29.0724	28.98	29.0487	29.0516	29.0774	6.34759e-08	1.4444e-06	-0.3713
Gns	Q8BFR4	26.5283	26.3255	26.4365	26.2818	26.3187	26.3429	25.9758	25.8179	25.9336	26.2735	26.1143	25.8857	0.000742493	0.00272329	-0.372155
Nagpa	Q8BJ48	24.3807	24.3313	24.1069	24.454	24.0945	23.8521	24.2835	23.918	24.1363	23.6288	23.4305	23.5852	0.0480092	0.0914005	-0.37288
Ptcd3	Q14C51	26.2458	26.1605	26.5234	26.3792	26.5247	26.5334	26.0873	26.116	26.0523	26.0162	25.8584	25.9831	0.000572216	0.00222825	-0.375602
Cyp20a1	Q8BKE6	25.0314	25.083	24.6533	24.9599	24.9815	25.0551	24.4501	24.3384	24.7117	24.8976	24.5767	24.5235	0.0044309	0.0120991	-0.377679
Atp6v1g1	Q9CR51	28.6685	28.6671	28.9348	28.959	28.6137	28.7932	28.3656	28.4225	28.4062	28.452	28.2691	28.4476	0.000196987	0.00091011	-0.378868
Cadm1	E9PYN1	25.3122	25.4326	25.4055	24.9819	24.8871	25.262	24.8226	24.9034	24.5522	24.7433	25.103	24.8813	0.00967343	0.0237052	-0.379253
Snrpa	D3Z0S6	26.1933	26.0349	25.7004	25.9971	26.1924	25.3298	25.1503	25.6939	25.4339	25.78	25.5472	25.5665	0.0434068	0.0840253	-0.379357
Ap2b1	Q9DBG3	28.5634	28.3589	28.5369	28.4445	28.5935	28.4871	28.0121	28.0959	28.0565	28.2759	28.1422	28.1249	2.24053e-05	0.000149592	-0.379481
Actl6a	Q9Z2N8	26.4025	26.3948	26.4356	26.3212	26.4526	26.4168	25.7168	26.248	25.9692	26.2054	26.1208	25.8844	0.00126045	0.00419065	-0.379784
Rhoa	Q9QUI0	29.4866	29.7115	29.7378	29.9222	29.8611	29.7797	29.2223	29.4364	29.3512	29.2647	29.426	29.5025	0.000498561	0.00197827	-0.382656
Arrb2	Q91YI4	27.4991	27.493	27.4623	27.3348	27.6299	27.4555	26.9299	27.0965	27.0195	27.4511	26.968	27.1127	0.00121908	0.00408598	-0.382848
Dok2	O70469	23.9825	24.0676	23.9653	23.7929	24.1883	24.2702	23.65	23.5229	23.9241	23.7203	23.4853	23.6671	0.0023313	0.00705719	-0.382865
Rps25	P62852	30.3294	30.0893	30.2945	30.2062	30.2348	30.2958	29.8617	29.7939	29.7857	30.0156	29.7719	29.9113	2.46076e-05	0.000161081	-0.384982
Atp6v0d1	P51863	29.4015	29.4033	29.482	29.4935	29.6497	29.6987	28.8669	29.2441	29.127	29.4457	29.043	29.0748	0.00221176	0.00677505	-0.387854
Rps3	P62908	32.3132	32.3122	32.2586	32.2276	32.2309	32.2955	31.8234	31.7769	31.8515	32.106	31.8389	31.8974	1.48055e-05	0.000105468	-0.390676
Gmds	Q8K0C9	25.7686	25.8041	25.5034	25.7315	25.4666	25.4068	24.9157	25.1371	25.0146	25.6519	25.4495	25.1546	0.0147789	0.0336525	-0.392955
Acadl	P51174	28.6026	28.6082	28.5216	28.539	28.4537	28.6207	27.8271	28.1089	28.3422	28.3375	28.1671	28.2051	0.000723942	0.00266989	-0.393011
Hadh	Q61425	28.3023	28.0662	28.0023	27.9214	28.2719	28.4694	27.7662	27.6816	27.6849	27.81	27.8789	27.8508	0.00159441	0.00509875	-0.393528
Xpot	Q9CRT8	26.8096	26.6542	26.6956	26.8729	26.9888	26.6913	26.2225	26.4151	26.4544	26.564	26.5282	26.1643	0.000931269	0.00328944	-0.393968
Npc1	O35604	25.2724	24.8757	25.1982	25.0634	25.1408	25.3751	24.7007	24.7088	24.8979	24.7413	24.8339	24.6689	0.000559484	0.0021863	-0.3957
Dhx30	A0A0G2JGL8	24.1092	23.8265	23.9093	24.0203	24.6187	24.4907	23.7537	24.1561	23.9044	23.4805	23.51	23.7951	0.0391429	0.0770194	-0.395801
Gpnmb	Q99P91	30.5912	30.9758	31.0605	30.8777	31.5039	31.0262	30.4485	30.5082	30.7013	30.4923	30.7405	30.7671	0.0145259	0.0331441	-0.396241
Acat1	Q8QZT1	29.5397	29.5529	29.5639	29.4202	29.4922	29.5944	29.0956	29.0348	29.1531	29.1102	29.1504	29.2397	1.03239e-06	1.19907e-05	-0.396599
Anxa6	F8WIT2	29.0221	28.8935	29.0466	28.8692	29.0443	28.9265	28.5444	28.5375	28.5228	28.7139	28.5442	28.558	3.84703e-06	3.54499e-05	-0.396903
Mapk14	P47811	25.6431	25.3435	25.7008	25.7382	25.8051	25.8463	24.5907	25.4326	25.5385	25.5827	25.3777	25.1713	0.038997	0.0768679	-0.397265
Spast	Q9QYY8	25.8569	25.9138	25.9422	26.0645	26.1669	26.0879	25.1047	25.5845	25.8679	25.4408	25.8319	25.8174	0.0125359	0.0292824	-0.397538
Ikbkap	Q7TT37	27.1365	26.9118	27.3037	26.9318	26.9212	27.0133	26.6402	26.6588	26.5756	26.8844	26.4497	26.6199	0.000944554	0.00331884	-0.398299
Twf2	Q9Z0P5	28.2511	28.305	28.2729	28.1417	28.2761	28.2485	27.7042	27.9712	27.7242	27.9931	27.9492	27.7586	5.34682e-05	0.000306252	-0.399159
Mrpl44	Q9CY73	25.2172	25.2504	25.3109	25.1271	25.0884	25.2855	24.9559	24.9223	24.6105	24.7416	24.8873	24.7515	0.000104749	0.000534122	-0.401691
Pdcd6ip	Q9WU78	30.0161	29.9113	29.8659	29.8845	29.8842	29.9661	29.6043	29.4163	29.5719	29.5459	29.4534	29.5223	8.65734e-07	1.05062e-05	-0.402348
Cox6c	Q9CPQ1	27.9131	27.8263	27.9424	27.7461	27.788	28.0407	27.3832	27.4967	27.304	27.6504	27.4075	27.5914	0.000179965	0.000838829	-0.40391
Eci1	P42125	26.9416	26.9023	27.2405	26.9637	26.9705	27.1395	26.452	26.5611	26.5143	26.8695	26.6783	26.6569	0.000557275	0.00218022	-0.40431
Cd68	P31996-2	29.4603	29.4475	29.537	29.4794	29.4599	29.5044	29.0293	29.158	29.0376	29.1312	29.0323	29.0724	2.93414e-08	8.60939e-07	-0.404619
Gla	Q8BGZ6	26.1787	26.5184	26.5216	26.3128	26.4401	26.5102	26.1833	26.2027	25.9994	26.0035	25.8304	25.8313	0.000932714	0.00328944	-0.405206
Apobr	Q8VBT6	25.896	25.9671	26.1664	25.8804	25.8748	25.8486	25.5193	25.695	24.9829	25.8027	25.7233	25.4743	0.0110716	0.0265099	-0.406003
Serbp1	Q9CY58	30.7235	30.8032	30.7657	30.6951	30.5831	30.6287	30.1974	30.2041	30.2908	30.3356	30.2332	30.5009	3.55021e-05	0.000220324	-0.406243
Rps18	P62270	31.5239	31.4763	31.5604	31.3137	31.2416	31.4633	30.983	30.8765	30.976	31.2716	31.0002	31.0292	0.000270163	0.00118285	-0.407127
Acot2	Q9QYR9	25.4991	25.4645	25.7445	25.3262	25.7302	25.7643	25.1245	25.2594	25.1399	25.1216	25.1061	25.3344	0.000668392	0.00252344	-0.407179
Pdia6	Q3TML0	31.3266	31.2561	31.4691	31.2985	31.3421	31.2853	30.8492	30.9598	30.8839	30.9496	30.8673	31.0241	1.67274e-06	1.73372e-05	-0.407309
Lrrfip1	Q3UZ39	27.0878	27.0441	27.3492	26.8342	27.4682	27.2569	25.0209	25.2674	25.7606	25.5512	26.1419	26.2653	4.42625e-05	0.519838	-0.407676
Rap2b	P61226	24.343	24.2219	24.3952	24.1937	24.687	24.6794	24.3179	24.1697	23.6203	24.1679	23.9421	23.8489	0.0137095	0.0315829	-0.408899
Adrbk1	Q7TS64	25.5281	25.3239	25.2056	24.8968	25.7566	25.4547	24.9716	25.0775	24.7553	24.8709	25.087	24.9461	0.0107029	0.0258306	-0.409557
Prdx4	O08807	30.493	30.3689	30.2958	30.4587	30.2943	30.3864	29.875	29.909	29.8717	30.0445	29.9684	30.1708	3.56905e-05	0.000220674	-0.409604
Pld4	Q8BG07-2	27.3158	27.1779	27.3718	27.1364	27.3056	27.402	26.9006	26.9919	26.7029	26.7608	26.8681	27.0257	0.000117132	0.000580454	-0.409908
Csnk1a1	H7BXB1	23.9095	23.5213	24.1811	23.7266	24.1276	23.9852	23.178	23.5429	23.7119	23.7483	23.3561	23.4488	0.0123717	0.0289945	-0.410907
Nucb1	Q02819	28.6557	28.6065	28.6772	28.619	28.7193	28.6389	28.1877	28.2771	28.1491	28.2625	28.2279	28.3427	1.859e-07	3.17263e-06	-0.411593
Erbb2ip	B2RUJ2	24.2826	24.0507	24.5345	23.701	23.9711	24.0639	23.9497	23.5433	23.7168	23.7286	23.6699	23.5197	0.0107359	0.0258686	-0.412642
Arl8a	F6QKK2	25.8708	25.9373	26.1038	26.2137	26.2278	26.2502	25.4655	25.6495	25.7517	26.2602	25.5235	25.4738	0.0143872	0.0329175	-0.413228
Sirt2	Q8VDQ8-2	24.8013	24.8968	25.0111	24.9805	24.8338	24.832	24.3926	24.7832	24.6869	24.349	24.2418	24.4156	0.00119421	0.00400754	-0.414402
Lsm8	Q6ZWM4	26.4957	26.3514	26.4521	26.1967	26.6523	26.4425	26.0625	25.9227	25.8606	26.012	26.0608	26.1849	0.000326204	0.00138357	-0.41454
Rab21	P35282	26.536	26.3378	26.6022	26.3709	26.6513	26.4511	25.6879	26.2527	25.9529	26.4599	26.0366	26.0689	0.00587023	0.015498	-0.415076
Cd9	P40240	28.3382	28.565	28.4937	28.387	28.5222	28.3006	28.1289	28.1181	27.8206	27.761	28.1582	28.1235	0.000617901	0.00237572	-0.416074
Csrp1	P97315	27.1472	27.2018	27.2357	26.9704	27.0761	26.9241	26.5429	26.8341	26.6271	26.6883	26.7962	26.5698	0.000154045	0.000735066	-0.416114
Cisd1	Q91WS0	27.6176	27.5775	27.7625	27.7812	27.5328	27.3766	26.966	27.1659	27.2534	27.2474	27.3298	27.1874	0.00039624	0.00162032	-0.41639
Sdhb	Q9CQA3	28.4523	28.5394	28.5612	28.5868	28.4796	28.598	28.041	28.1088	28.1377	28.1037	28.2695	28.0574	1.38107e-06	1.48947e-05	-0.416528
Htatip2	Q9Z2G9	26.2783	25.9648	26.0695	25.8591	26.1809	25.8627	25.4605	25.783	25.5887	26.0275	25.4167	25.4374	0.00634204	0.016509	-0.416926
Mrpl13	F7CXG9	24.2325	24.5993	24.7805	24.8352	24.4803	24.5144	23.8941	24.4673	23.834	24.0216	24.0872	24.6347	0.0256646	0.0536215	-0.417203
Rps9	Q6ZWN5	31.6116	31.5854	31.6536	31.6134	31.5985	31.6472	30.9752	30.9795	31.1406	31.4581	31.3361	31.3076	0.000470605	0.00189431	-0.41875
Otub1	D3YWF6	28.1142	27.9025	28.1376	28.1871	27.8842	28.0282	27.4048	27.7496	27.5406	27.8609	27.6243	27.5591	0.00054032	0.00211884	-0.419066
Rassf2	Q8BMS9	24.9714	24.4691	24.9009	25.0833	25.4045	24.8319	24.6338	24.4681	24.6638	24.4778	24.4786	24.42	0.00977176	0.0239111	-0.419835
Emc10	D3Z665	23.0163	23.3307	23.3856	23.0729	23.468	23.1709	22.4698	22.7739	22.3527	23.3992	22.9974	22.909	0.033054	0.0667666	-0.423723
Akap9	E9QQ10	26.972	26.7806	26.8687	26.7808	26.5614	26.4045	26.298	26.3139	26.3026	26.4308	26.1822	26.2967	0.000894888	0.00318324	-0.423983
Lamtor5	Q9D1L9	26.2994	26.1518	26.4086	26.3075	26.5739	26.4361	26.4243	25.7244	25.9307	25.9321	25.6251	25.9853	0.00741443	0.0188746	-0.425897
Vps26a	P40336	27.4615	27.4842	27.524	27.8476	27.6591	27.5245	27.0434	27.0677	27.1897	27.6085	27.1174	26.897	0.00404257	0.0112499	-0.429524
Fam96a	Q9DCL2	23.2249	23.7163	23.6184	23.7403	23.7813	23.7163	23.1167	23.5591	22.8885	23.6391	23.3122	22.6773	0.0330331	0.0667648	-0.434095
Idh3g	P70404	27.7277	27.7582	27.9277	27.8078	28.0273	27.92	27.2355	27.5103	27.4576	27.5333	27.4106	27.4151	4.83566e-05	0.000283777	-0.434364
Parvg	E9PYG5	24.8114	24.6779	24.8579	25.0181	25.5597	25.0083	24.9389	24.3312	24.5238	24.4172	24.6982	24.4144	0.0191875	0.0421143	-0.434937
Ly6e	A0A087WNS9	25.2456	25.3619	25.3712	25.2949	25.336	25.1781	24.7242	24.8753	24.7893	25.1067	24.8146	24.8515	3.37605e-05	0.000211527	-0.43771
Cstb	Q62426	30.4519	30.4101	30.4237	30.4718	30.3198	30.371	29.6895	30.0242	29.9773	30.1184	30.1025	29.9053	7.82936e-05	0.000420373	-0.438516
Actr3	Q99JY9	30.5991	30.5588	30.6145	30.531	30.6096	30.5757	30.1204	30.1081	30.0671	30.1897	30.1327	30.2383	2.59915e-08	7.90378e-07	-0.438722
Ccdc53	S4R1P7	23.9406	23.7916	24.0555	23.7414	23.7104	23.8082	23.5699	23.3069	23.3846	23.6623	23.3023	23.1791	0.000710601	0.00263229	-0.44047
Hs3st1	O35310	25.3841	25.3089	25.47	25.3055	25.9383	25.3519	24.9518	24.7962	25.0637	25.1946	25.0931	25.0135	0.00301067	0.00881075	-0.440973
Mrps7	Q80X85	25.8415	25.8178	25.9642	26.0397	25.8394	26.3639	25.441	25.6083	25.4948	25.7	25.4434	25.529	0.000876418	0.00313542	-0.441626
Exosc10	Q8K366	26.5183	25.8312	26.5982	26.3632	26.3764	26.4978	25.8831	25.9949	26.2801	26.1645	25.2886	25.9132	0.0337424	0.0679929	-0.443456
Pycrl	Q9DCC4	26.7838	26.4388	26.5751	26.3943	26.5647	26.7282	26.2267	25.9525	26.0175	26.3368	26.1114	26.1738	0.00038369	0.00157477	-0.44437
Ints9	Q8K114	23.6055	23.5058	23.5819	23.3851	23.5902	23.3072	22.5567	23.377	23.3123	23.1033	23.4243	22.5232	0.0286081	0.0589976	-0.446456
Napg	D3Z4B2	25.0484	24.9455	25.5686	25.1976	25.2867	25.0887	24.5938	24.6103	24.8215	24.8958	24.7366	24.7955	0.00141547	0.00459237	-0.447016
Nup85	Q8R480	28.4898	28.5567	28.1579	28.5401	28.5592	28.6195	28.3076	27.9248	28.3459	28.2122	27.7565	27.6695	0.00816055	0.0206171	-0.451154
Wdfy4	E9Q2M9	25.4961	25.0337	25.3978	25.4313	25.734	25.5551	25.0972	24.9044	24.9338	25.0855	24.7754	25.1446	0.00229275	0.0069594	-0.451199
Tom1	Q3UDC3	24.6368	24.5778	24.2741	24.594	24.8215	24.5718	23.8018	23.5703	24.3035	24.5684	24.392	24.1312	0.0241046	0.0509028	-0.451438
Psme2	P97372	29.1871	29.2512	28.9379	29.128	29.2073	28.955	28.7751	28.5462	28.7759	28.3724	28.6369	28.8493	0.000562502	0.00219297	-0.451797
Gmppa	Q922H4	25.0059	25.2028	25.2282	24.9688	25.3119	25.0104	24.5188	24.8142	24.5197	24.96	24.6387	24.5502	0.000723349	0.00266989	-0.454451
Gga1	Q8R0H9	25.3843	25.2786	25.1724	25.2371	25.5553	25.4412	24.2449	24.9767	24.9888	24.9815	25.1611	24.9802	0.0101476	0.0246505	-0.455958
P2rx7	Q9Z1M0	27.3055	27.8273	27.6887	27.8086	27.8734	27.2723	27.5535	26.7466	27.6172	27.2637	26.9458	26.9111	0.0327757	0.0663648	-0.456301
Mrpl39	Q9JKF7	25.23	25.5132	25.2271	25.3016	25.1144	25.3674	24.5129	24.7574	24.8381	25.0372	24.8464	25.0091	0.000736169	0.00270603	-0.458778
Cul1	Q9WTX6	26.3334	26.0088	26.4333	26.483	26.3487	26.537	25.6501	25.8969	25.8578	26.1116	25.9575	25.9138	0.000860737	0.00309255	-0.459418
Stat6	P52633	24.4471	24.2305	24.4182	24.3266	24.6142	24.5443	24.1761	24.0173	24.0299	24.0752	23.5875	23.9353	0.00103749	0.00358884	-0.459934
Gaa	P70699	26.8971	27.0076	26.6125	27.1644	26.9938	26.9459	26.8415	26.5625	26.6444	26.2914	26.0914	26.4292	0.00579064	0.0153363	-0.46015
LOC102641949	Q9D172	27.0744	26.9256	27.0964	26.9473	26.8313	26.8511	26.4383	26.5188	26.5137	26.3824	26.3261	26.7546	0.000113292	0.000569012	-0.46539
Mrpl37	Q921S7	24.592	24.4533	24.3791	24.4142	24.8729	24.8261	23.7715	24.3504	24.1037	24.4028	23.7813	24.3331	0.00985906	0.024084	-0.465815
Cops2	P61202	27.3774	26.9066	27.2465	26.9327	27.5369	27.2154	26.4749	26.4335	26.9936	27.0147	26.9903	26.5108	0.0133066	0.0308246	-0.466287
Pcyox1l	Q8C7K6	24.47	24.893	25.1529	25.2943	25.2249	25.0334	24.6321	24.3996	24.4491	24.8813	24.5231	24.3834	0.00920537	0.022792	-0.466658
9030624J02Rik	D3YW19	24.6262	24.3975	24.5057	25.1514	25.1665	24.9672	24.22	24.2753	24.5532	24.3108	24.3906	24.2636	0.00945624	0.0232924	-0.466882
Hypk	Q9CR41	25.8683	25.583	25.7942	25.727	25.4615	25.4888	24.7239	24.9229	24.9281	25.5467	25.8201	25.176	0.0297101	0.0610444	-0.467529
Chmp3	Q9CQ10	25.4763	25.3585	25.3579	25.4823	25.7539	25.3381	25.0996	24.8168	25.2876	25.1582	25.1583	24.4404	0.00836188	0.0210755	-0.4677
Plbd2	Q3TCN2	25.9471	25.9011	25.8985	25.8075	25.9178	25.9052	25.4428	25.3382	25.3852	25.6689	25.4653	25.2682	1.35735e-05	9.82754e-05	-0.468098
Rps6ka3	P18654	26.9358	26.8282	26.9666	27.0069	27.2229	26.9537	26.885	26.5831	26.646	26.1891	26.3478	26.45	0.00196994	0.00611832	-0.468888
Shmt1	G3UZ26	28.2805	28.0436	28.3641	28.2414	28.1652	28.191	27.7844	27.6682	27.7109	28.032	27.8521	27.4213	0.000555121	0.00217433	-0.469473
Acaa1a	Q921H8	28.9942	28.8872	28.9474	28.8791	28.7951	28.8762	28.3405	28.4757	28.4182	28.5223	28.43	28.3755	2.62896e-07	4.05248e-06	-0.469497
Mcts1	Q9DB27	26.0254	26.4299	26.3973	26.3835	26.529	26.4392	25.8185	25.7772	25.7731	25.8005	26.0558	26.1616	0.000784426	0.00285207	-0.469614
Pf4	Q9Z126	25.1628	25.2034	25.3661	25.2034	25.1553	25.2928	25.0046	24.6642	24.8039	24.7341	24.5037	24.8476	0.000116004	0.000577432	-0.470969
Adssl1	J3QN31	24.3306	24.5369	24.8127	24.7303	24.6016	24.5399	24.5296	23.6693	24.0895	24.2351	24.1998	23.9888	0.00579044	0.0153363	-0.473317
Lypla2	Q9WTL7	25.733	25.8937	25.6802	25.9342	26.551	25.8463	25.5783	25.3168	25.6242	25.4739	25.4183	25.3845	0.00615889	0.0161201	-0.473708
Rragc	Q99K70	25.8974	26.0923	26.4105	26.8357	26.7405	26.5533	25.7154	26.1918	25.9703	25.9294	26.1656	25.7054	0.0203851	0.0444222	-0.475299
Rpl18	P35980	31.0701	30.9836	31.1025	31.3536	31.2488	31.2437	30.7039	30.3198	30.7037	31.1202	30.81	30.4866	0.00351989	0.0100547	-0.476328
Cpsf7	Q8BTV2-2	24.3837	24.6769	23.8764	24.5508	24.4167	24.3169	24.3746	23.9589	24.0655	23.4317	23.544	23.9858	0.0251008	0.052707	-0.476788
Hibch	Q8QZS1	26.5139	26.2687	26.56	26.374	26.4623	26.4238	26.1449	25.8428	25.9258	26.1144	25.8927	25.8113	5.43703e-05	0.000310886	-0.478481
Vps13c	Q8BX70-3	28.582	28.4265	28.6242	28.5236	28.6194	28.6017	27.962	28.0631	27.961	28.3535	28.045	28.1135	3.04027e-05	0.00019445	-0.479891
Hmgcl	P38060	27.7801	27.6389	27.6117	27.5794	27.8073	27.8142	27.2483	27.2331	27.2003	27.1594	27.2263	27.2837	1.26888e-06	1.40543e-05	-0.480071
Cox6b1	P56391	28.1879	28.1777	28.3073	28.1839	28.144	28.2173	27.5611	27.8196	27.5909	27.9375	27.7328	27.6826	1.57148e-05	0.000111133	-0.482254
Rnmt	Q9D0L8	26.8751	27.0081	27.058	26.9454	26.896	27.1271	26.3311	26.2828	26.3021	26.7745	26.7244	26.5965	0.000670857	0.00252704	-0.483017
Dimt1	Q9D0D4	25.5059	25.0179	25.4677	25.7243	25.7917	25.7691	25.3243	24.9768	24.238	25.1206	25.4146	25.2726	0.0444753	0.0857957	-0.488273
Txn2	G3UZY2	26.7715	26.8121	27.2524	26.9434	26.9304	26.9293	26.2955	26.3134	26.3917	26.9519	26.2255	26.5286	0.00350055	0.0100217	-0.48877
Tsnax	Q9QZE7	26.1229	26.275	26.1556	26.1107	26.0117	26.2858	25.6771	25.5927	25.964	25.3005	25.7109	25.7771	0.00060149	0.00232599	-0.489897
Ganab	Q8BHN3	29.996	29.8974	29.9985	30.0006	29.9982	30.0293	29.3481	29.4988	29.5081	29.7316	29.4887	29.4025	5.97599e-06	4.97256e-05	-0.490362
Rplp2	P99027	31.8849	31.7616	31.9441	31.835	31.8087	31.9221	31.2204	31.2859	31.2589	31.5161	31.3751	31.5567	1.68536e-05	0.000117694	-0.490537
Hgsnat	Q3UDW8-2	25.149	25.2169	25.5584	25.3837	25.2717	25.5122	24.8729	24.7536	24.4689	25.4404	24.8348	24.7648	0.00727112	0.018603	-0.492711
Myh14	K3W4R2	25.8662	25.8791	25.936	26.0498	25.8686	25.9437	25.5119	25.6657	25.1447	25.6476	25.2314	25.3757	0.000333387	0.00140105	-0.494395
Pfdn5	Q9WU28	26.4831	26.0592	26.0807	26.0367	26.057	26.153	25.7886	25.5351	25.7879	25.4253	25.4199	25.9383	0.00136397	0.00445555	-0.495805
Ppt1	O88531	26.7893	26.7899	26.8844	26.539	26.9243	26.9597	26.4379	26.3954	26.2422	26.23	26.2511	26.3529	4.14893e-05	0.000250509	-0.496191
Dr1	Q91WV0	25.4411	25.6341	25.4716	25.5345	25.6794	25.5645	25.2784	24.8802	25.2004	24.9614	24.8035	25.2211	0.000256276	0.00113242	-0.496713
Vwa5a	Q99KC8	27.554	27.7038	27.518	27.5848	27.632	27.569	27.117	27.0402	27.254	27.2241	26.8134	27.1269	3.29154e-05	0.000207349	-0.497671
Pafah1b2	Q61206	27.5255	27.4908	27.6055	27.4556	27.4226	27.4277	26.8595	26.9272	26.8395	27.3422	27	26.9699	9.8614e-05	0.000510625	-0.498237
2019-09-02	P42208	29.0013	28.832	28.975	28.869	29.0393	28.881	28.4977	28.2534	28.3876	28.5511	28.4639	28.4494	3.41309e-06	3.18016e-05	-0.499099
Qdpr	A0A0G2JGJ1	27.2954	27.0852	27.0092	27.2504	27.1102	27.1993	26.8573	26.7195	26.3643	26.5346	26.6403	26.8385	0.000221483	0.00100342	-0.4992
Srm	Q64674	29.6012	29.6168	29.6131	29.5973	29.478	29.6406	28.9585	28.897	29.1628	28.8898	29.1926	29.4399	0.000263506	0.00115521	-0.501072
Mrps18c	Q8BTZ9	23.6943	24.6787	24.2738	24.1009	24.2708	24.1206	23.6128	23.7953	24.0727	23.2671	23.8104	23.5732	0.0151742	0.0344586	-0.501286
Cryzl1	Q921W4	25.1015	24.4801	25.056	24.9609	25.1598	25.1591	24.3506	24.3273	24.4906	24.538	24.4169	24.7799	0.00250273	0.00750145	-0.502356
Twf1	Q91YR1	24.8126	24.7547	24.812	24.831	25.0926	24.8035	24.3233	24.4203	24.2599	24.3518	24.3564	24.3754	3.06185e-06	2.89319e-05	-0.503212
Stxbp5	D3Z2Q2	25.7728	24.9964	25.7384	25.5231	25.4118	25.4822	24.5624	25.1493	24.828	25.3354	24.669	25.3442	0.0185392	0.040906	-0.506056
Nagk	Q9D997	24.8429	24.9339	24.9287	24.9167	25.0219	24.9543	24.9344	24.7292	24.4402	24.2565	23.9529	24.2388	0.00636986	0.0165428	-0.507754
Wdr77	Q99J09	27.8895	27.8374	27.7011	27.6984	27.9195	27.6549	27.3116	27.3428	27.3091	27.2674	27.0465	27.3767	1.78385e-05	0.00012303	-0.50778
Cdc42	P60766	29.4672	29.4294	29.4282	29.3608	29.3681	29.214	28.832	28.9864	28.8126	28.8891	28.766	28.9092	1.01108e-06	1.18669e-05	-0.512055
Snx8	Q3U0I9	25.7408	25.6151	25.4739	25.6684	25.8107	25.5683	25.6073	25.3029	25.1176	25.0663	24.9049	24.7958	0.00256308	0.00763447	-0.513726
LOC102642884	P17665	29.5108	29.5074	29.8491	29.7204	29.7768	29.6004	28.8611	29.209	29.2556	29.3575	29.0333	29.1373	0.000226074	0.00101642	-0.518492
Ssu72	Q9CY97-2	25.6606	25.5761	25.7984	25.613	25.8244	25.4109	24.9696	25.1137	25.1578	25.404	25.204	24.9128	0.0002715	0.00118715	-0.520244
Ndufa10	Q99LC3	27.0053	26.734	26.8535	26.8631	27.0013	27.0591	26.562	26.4752	26.452	26.1988	26.3031	26.4028	3.18866e-05	0.000202777	-0.5204
Ppa2	Q91VM9-2	25.4866	24.7354	24.8941	24.9332	25.1702	25.3493	24.4531	24.924	24.6407	25.0924	24.5228	23.8019	0.0377326	0.0748609	-0.522283
Nae1	E0CZE0	24.7817	24.7517	25.0074	24.5569	24.6989	24.8512	24.2348	23.8673	24.3608	24.2433	24.3953	24.4077	0.000481305	0.00193041	-0.523124
Itgb2	Q542I8	29.6326	29.5852	29.643	29.5255	29.5227	29.5818	28.9744	29.178	28.8973	29.228	29.0126	29.0611	2.55967e-06	2.48177e-05	-0.523248
Scpep1	Q920A5	27.3129	27.3286	27.4554	27.4689	27.6464	27.4865	26.9022	26.9704	26.8679	26.7468	26.8578	27.2143	7.69306e-05	0.000415723	-0.523256
Snap29	Q9ERB0	25.9752	25.7982	26.0067	25.7256	25.9376	25.3459	25.3302	25.2824	25.2426	25.2447	25.1127	25.4237	0.000709184	0.00263209	-0.525478
Rars2	Q3U186	24.2603	24.1442	24.3788	24.4213	24.5234	24.6302	23.7499	24.18	23.8279	24.1258	23.9679	23.3535	0.00416214	0.0115156	-0.525516
LOC102642088	Q9D358	26.9382	27.1366	27.0165	26.7096	26.9326	27.0812	26.2726	26.6044	26.498	26.75	26.3396	26.1864	0.000584284	0.00226732	-0.527301
Dcps	Q9DAR7	27.6464	27.6241	27.6778	27.7726	27.6358	27.6101	27.2374	26.9732	26.877	27.3812	27.1789	27.1487	4.99697e-05	0.000291199	-0.528406
Gba	P17439	26.7603	26.4487	26.7558	26.7083	26.9683	27.0646	26.4288	26.1543	26.0505	26.6898	26.0408	26.17	0.00305216	0.00891658	-0.528636
Cacybp	Q9CXW3	29.9174	29.8405	29.8944	29.8306	29.8163	29.8866	29.3538	29.1128	29.2835	29.4659	29.286	29.5111	5.68236e-06	4.79575e-05	-0.528779
Gstp1	P19157	27.3421	27.3264	26.9919	27.1323	27.2397	27.3425	26.9619	26.5404	26.4758	26.8405	26.5178	26.8602	0.000464504	0.00187427	-0.529747
Rbbp5	Q8BX09	24.4571	24.222	24.1889	24.3718	24.3542	24.3018	23.8287	23.9026	23.6773	23.6953	23.7109	23.8928	3.72927e-06	3.44597e-05	-0.531349
Enoph1	Q8BGB7-2	26.1811	26.0857	25.6177	25.8697	25.779	25.6076	25.7869	25.3868	25.7085	24.7958	25.0873	25.1761	0.0155114	0.0351052	-0.533244
Bnip1	B8JJI4	24.2534	24.0176	24.0871	24.2037	23.841	23.9247	23.6218	23.4113	23.5755	23.8314	23.9121	22.775	0.0136805	0.0315376	-0.533384
Hars	Q61035	28.851	28.7089	28.8412	28.8977	28.9415	28.8066	28.3373	28.2284	28.3715	28.3423	28.4615	28.1026	5.02026e-06	4.33922e-05	-0.533875
Mapk3	D3Z3G6	26.2848	26.1398	26.169	26.4467	25.9518	26.3455	25.776	25.6673	25.7939	25.9716	25.4153	25.5076	0.00063781	0.00243547	-0.534336
Fis1	G3X9U9	25.8316	25.3734	25.6173	25.8846	25.6004	25.7482	24.8194	25.1169	25.128	25.491	25.0981	25.1909	0.000967953	0.00339037	-0.535203
Atxn10	P28658	28.1503	28.1287	28.4541	28.4136	28.5184	28.3281	27.7532	27.7652	27.7539	27.9838	27.9029	27.6183	8.30847e-05	0.000441842	-0.536032
Acot7	Q91V12-2	27.309	27.3478	27.4776	27.3946	27.2714	27.3157	26.768	26.6922	26.8964	27.1135	26.4529	26.9664	0.000289109	0.00124863	-0.537784
Rps12	Q6ZWZ6	31.0025	30.8939	30.9714	30.9468	30.8749	31.0163	30.3989	30.1533	30.3562	30.6541	30.4723	30.4272	1.7022e-05	0.000118531	-0.540635
Stx7	Q8BH40	26.3292	26.2436	26.301	25.9673	26.2736	26.2003	25.8273	25.4681	25.6905	25.8014	25.5778	25.7039	3.66592e-05	0.000225829	-0.541007
Dab2	E9QL31	29.4591	29.4147	29.3942	29.3075	29.4559	29.4227	28.8621	28.8496	28.8091	28.9766	28.7879	28.9143	3.6746e-08	9.99313e-07	-0.54241
Mdc1	E9QK89	24.5394	24.4314	24.2405	24.3105	24.8291	24.4373	24.2655	23.8379	23.7889	23.9815	23.574	24.0841	0.00191529	0.00598192	-0.542733
Cyb5a	G5E850	27.4357	27.2799	27.6018	27.294	27.7186	27.5528	26.6335	27.0945	26.8297	27.088	26.9179	27.054	0.000358582	0.00148264	-0.544203
LOC102642507	Q78IK2	26.9697	26.9536	27.2006	27.1276	27.1836	27.2461	26.1196	26.6346	26.3722	27.1052	26.5212	26.6395	0.00334817	0.00964652	-0.548138
Sh3bgrl3	Q91VW3	29.4574	30.1369	29.5848	29.8404	29.1985	29.359	29.9371	28.7586	29.2818	28.7981	28.7509	28.7536	0.0462775	0.0887095	-0.54946
Dynll1	P63168	26.73	26.8009	27.1516	26.9454	26.9556	26.901	25.8094	26.1951	26.2049	27.0625	26.4906	26.4182	0.0121356	0.0285869	-0.550665
Pdxk	Q8K183	28.6829	28.6992	28.7429	28.6082	28.7221	28.6529	28.0671	28.1283	28.1305	28.178	28.1968	28.0862	2.92547e-09	2.08207e-07	-0.553551
Gm38481	P58044	27.1427	27.0707	27.144	27.1874	27.0348	27.0715	26.4772	26.6309	26.6432	26.6863	26.514	26.3744	1.28785e-06	1.42174e-05	-0.554166
Pgk1	P09411	33.2813	33.4022	33.385	33.3874	33.3197	33.3394	32.7641	32.6996	32.8295	32.6279	32.9784	32.8871	1.59087e-06	1.66295e-05	-0.554715
Stx12	Q9ER00	26.6784	26.4209	26.2572	26.2717	26.2728	26.3417	25.906	25.871	25.7624	25.8853	25.4083	26.0754	0.000603661	0.00233169	-0.555712
Aco1	P28271	27.3529	27.1536	27.1412	27.2057	27.3371	27.2521	26.6769	26.678	26.7695	26.6369	26.5859	26.7584	3.14635e-07	4.66061e-06	-0.55616
Dpp9	Q8BVG4-2	22.5781	21.9717	22.1721	22.7297	22.6693	22.7941	22.3239	22.095	22.0277	21.6455	21.9522	21.5097	0.0121716	0.0286316	-0.56015
Opa1	H7BX01	26.022	25.5934	25.8538	26.0099	25.5614	25.7981	24.97	25.3175	25.4446	25.124	25.1275	25.4828	0.000661848	0.00250439	-0.562025
Sash1	F8VQK5	25.8619	25.5661	25.507	25.2187	25.4443	25.8916	25.1821	25.0271	24.7892	25.4621	24.7002	24.9483	0.00443552	0.0121018	-0.563451
Psmg1	D3Z795	27.1195	27.1954	27.0064	27.1228	27.0284	26.9201	26.5302	26.2146	26.7131	26.5567	26.4501	26.5446	2.96091e-05	0.000190101	-0.563893
Ifrd2	Q9D8U0	23.6366	22.915	22.9419	23.6765	24.3975	23.6206	22.4176	23.0067	23.2094	23.1369	22.9843	23.0302	0.0485111	0.0921913	-0.567153
Rab14	Q91V41	29.1042	28.9048	29.0199	29.0248	29.1733	29.0809	28.2347	28.5663	28.4903	28.6804	28.4577	28.4743	1.14901e-05	8.522e-05	-0.567325
Plin3	Q9DBG5	29.3011	29.4127	29.3759	29.2723	29.3624	29.353	28.8671	28.7299	28.8083	28.6104	28.7779	28.8758	1.98896e-07	3.3772e-06	-0.567976
Vrk3	D3Z2U5	22.6348	22.5385	22.3455	22.3928	22.4652	22.4067	21.8778	21.8756	22.4458	21.4691	21.7782	21.9159	0.00187043	0.00586705	-0.570176
Amdhd2	Q8JZV7	25.6084	25.9493	25.7223	25.6768	25.8822	25.6367	25.3017	25.1965	25.4558	25.1587	24.6702	25.2699	0.000936527	0.00329657	-0.570491
Glg1	F8WHM5	28.7147	28.3889	28.7559	28.6002	28.6653	28.5922	28.0715	27.9453	27.8601	28.403	27.9711	28.0398	0.000114795	0.000574835	-0.571091
Dars2	Q8BIP0	25.3527	25.2149	25.1856	25.4404	25.2506	25.5456	25.1787	24.93	24.1576	24.8029	24.3855	25.1037	0.00866368	0.021643	-0.571913
2019-09-07	E9Q9F5	28.5163	28.3234	28.325	28.3095	28.326	28.3973	27.7598	27.8894	27.7554	27.8232	27.7036	27.833	9.81064e-08	1.95568e-06	-0.572171
Mydgf	Q9CPT4	27.2169	27.3607	27.3217	27.3344	27.1201	27.1856	26.5682	26.6472	26.5143	26.9358	26.5404	26.8991	5.49705e-05	0.000313782	-0.57237
Trim56	Q80VI1	22.6916	22.8063	22.0508	22.5027	22.6513	21.9874	21.7959	22.7175	21.6822	21.1684	22.127	21.7646	0.047631	0.0908357	-0.572424
Eif4b	Q8BGD9	29.3734	29.4902	29.4726	29.3677	29.222	29.2814	28.8189	28.7298	28.8739	28.7429	28.5559	29.0459	2.82174e-05	0.000182567	-0.573329
Cdk4	E9Q9E4	24.764	24.2725	24.6776	24.5289	24.45	24.6709	24.3419	24.3933	24.0268	23.8281	23.8442	23.4784	0.00474493	0.0128309	-0.575177
Btk	P35991	27.023	26.7629	26.4433	26.8134	26.8765	26.8942	26.5802	25.9838	26.573	26.0715	26.1811	25.9713	0.00211506	0.00652663	-0.575407
Bre	D3Z7P0	25.6791	25.5061	25.8101	25.4814	25.4384	25.6956	25.1868	24.916	24.831	25.233	25.0838	24.9043	8.16989e-05	0.000437252	-0.575949
Arpc2	Q9CVB6	30.0346	30.0621	30.0284	30.2413	29.9761	30.0536	29.3856	29.5573	29.5066	29.5291	29.5186	29.4302	1.81746e-07	3.14734e-06	-0.578115
Rab11fip5	Q8R361	25.7346	25.7346	25.787	26.0639	25.768	25.6466	25.2082	25.39	25.1592	25.0595	25.3395	25.1025	2.55606e-05	0.000166343	-0.579325
Itgb5	Q6PE70	25.7371	25.7488	25.5702	25.8003	26.2298	25.8002	25.1644	25.2749	25.3848	25.5351	24.8765	25.1643	0.00110555	0.00376586	-0.581042
Prpsap2	Q8R574	26.5027	26.6228	26.5672	26.3655	26.5915	26.5776	25.7895	25.868	26.0274	26.2276	25.9163	25.9019	1.28054e-05	9.3856e-05	-0.582775
Aldh2	P47738	32.252	32.2303	32.3312	32.2209	32.2795	32.3074	31.5105	31.7319	31.65	31.861	31.6466	31.7099	4.0488e-07	5.64302e-06	-0.585243
Cyfip2	Q5SQX6	24.2987	23.9634	24.2462	24.0768	24.3627	24.0855	23.6333	23.6645	23.0346	23.5894	23.7722	23.8133	0.00118368	0.00399477	-0.587636
Ero1l	Q8R180	28.0603	27.7804	28.3465	27.947	28.0644	28.2688	27.3399	27.3877	27.3232	27.6725	27.4785	27.729	0.00033029	0.00139237	-0.589413
2019-09-11	Q8C1B7-3	27.6528	27.5149	27.9804	27.8102	27.7637	27.7566	27.0579	27.2523	27.1575	27.1268	27.1705	27.1766	6.42332e-06	5.27912e-05	-0.589507
Ndufa5	Q9CPP6	25.9071	25.4697	26.0225	25.6182	26.0634	25.808	25.5006	25.2884	24.9849	25.2084	25.1697	25.1947	0.000513245	0.00202692	-0.590367
Drap1	D3YYC2	25.1623	24.2977	24.8988	24.7898	25.3679	25.3027	24.1459	24.5057	24.3627	24.4537	24.2421	24.5634	0.00716657	0.0183836	-0.590928
Ube4b	Q9ES00	24.7868	24.6522	24.8041	24.4567	24.7099	24.6903	24.323	24.032	24.1264	24.1738	24.0664	23.793	4.85555e-05	0.000284445	-0.597548
Tm9sf2	P58021	26.4948	26.2585	26.6181	26.6972	26.7917	26.6491	25.7709	26.0122	26.1429	26.2567	25.9266	25.8119	0.000259641	0.00114276	-0.598019
Ncapd3	Q80W41	22.0619	22.1901	21.9811	22.4453	22.8615	22.1766	21.4416	21.6246	21.3813	22.2001	21.8175	21.6519	0.00732281	0.0186797	-0.59992
Herc4	Q6PAV2-2	22.6682	22.4208	22.4995	22.8891	22.3366	22.8379	22.9222	22.4437	21.666	21.4771	22.0275	21.5084	0.0392793	0.077197	-0.601178
Ppp1r7	Q3UM45	26.7568	26.6551	26.6914	26.5392	26.7448	26.6438	26.5136	26.0193	26.2281	25.8233	26.0023	25.8314	0.000318003	0.00135679	-0.602189
Psmb4	P99026	28.0661	28.0307	27.99	28.0364	27.9763	27.9021	27.2129	27.533	27.3982	27.1181	27.4594	27.6653	3.76731e-05	0.000231648	-0.602459
Fcgr2b	A0A0B4J1G1	26.5743	26.6216	26.3028	26.3439	26.4198	26.5157	25.6973	25.7271	25.5886	25.9229	26.004	26.2138	0.000229193	0.00102906	-0.604079
Gars	Q9CZD3	29.9731	29.9056	29.984	29.8218	30.044	30.0052	29.2975	29.2935	29.3381	29.4611	29.1035	29.6119	1.44409e-05	0.000103436	-0.604674
Gsr	P47791-2	26.9534	26.9142	26.9641	26.7807	26.8018	26.6171	26.3614	26.3524	25.9818	26.2228	26.1082	26.3705	3.2017e-05	0.000202835	-0.605703
Prmt5	Q8CIG8	26.7918	26.8591	26.8353	26.649	26.6963	26.6786	26.1289	26.1832	25.7826	26.1231	26.2703	26.381	5.18211e-05	0.000299381	-0.606812
Rela	Q04207-2	24.1366	23.8974	24.0697	23.9843	23.9031	24.0495	22.3682	23.2659	23.0839	23.919	23.9623	23.798	0.0393998	0.0773884	-0.607231
Uggt1	Q6P5E4	28.2023	28.3987	28.001	28.2314	28.211	28.3102	27.9729	27.7109	27.7426	27.0321	27.5471	27.6527	0.00133041	0.00436298	-0.616051
Naca	Q60817	29.8411	29.8086	29.995	29.8458	29.9757	29.931	29.2003	29.2114	29.1613	29.3461	29.2924	29.4839	9.31738e-07	1.10913e-05	-0.616957
Map2k3	O09110-2	24.3251	24.1504	24.8038	24.5452	25.2284	24.932	24.0352	23.87	23.6448	24.5804	24.1648	23.9833	0.0140595	0.0323002	-0.617732
Capns1	D3YW48	26.0034	25.9041	26.1716	26.0985	26.121	26.1299	25.9668	25.1905	25.7956	25.2751	25.1855	25.303	0.00159766	0.00510167	-0.618667
Ndufs5	B1ARW4	25.4667	25.3993	25.6042	25.3031	25.4373	25.4214	25.0882	24.6375	24.5772	25.2772	24.8838	24.4524	0.0010919	0.00373075	-0.6193
Fabp5	Q05816	30.8911	30.8553	30.8927	30.7238	30.5576	30.816	30.1635	30.2036	30.1061	30.1181	30.0985	30.3099	1.60629e-06	1.67384e-05	-0.622802
Cnpy3	Q9DAU1	26.5388	26.8115	26.9286	26.5194	26.541	26.7115	25.8501	25.9599	25.9304	26.2171	26.0679	26.2845	8.50996e-05	0.00045136	-0.623496
Cwc15	Q9JHS9	25.9315	25.7325	25.8228	25.3842	25.4284	25.6426	24.9831	24.9132	24.9205	25.1277	24.9379	25.3185	0.00021029	0.000960955	-0.623521
Rraga	Q80X95	25.1351	25.4421	24.7805	25.4945	25.2451	25.6099	24.8122	24.4615	24.3382	24.8002	24.6214	24.9203	0.00224051	0.00683804	-0.625569
Ugt1a7c	Q6ZQM8	26.9458	27.0006	26.9101	27.0832	27.2954	27.16	26.2077	26.6395	26.4073	26.7243	26.256	26.4062	0.000115417	0.000575367	-0.625706
Tmlhe	Q91ZE0	25.8437	25.8565	26.0367	25.8493	25.9072	25.5813	25.0616	25.2941	24.9972	25.7094	24.9096	25.3427	0.000887541	0.00316506	-0.626676
Pfdn2	O70591	27.2208	27.2025	27.3719	27.3052	27.4396	27.4255	26.7376	26.5806	26.6701	26.7193	26.8508	26.6443	5.68283e-07	7.41809e-06	-0.627125
Gnb2l1	P68040	32.0145	31.9427	32.0196	31.9419	31.9593	31.9848	31.2895	31.208	31.375	31.3047	31.3808	31.5386	1.29003e-07	2.37096e-06	-0.627697
Cndp2	Q9D1A2	29.9869	30.1542	30.0854	30.0977	30.1733	30.0992	29.4018	29.339	29.5067	29.3083	29.6265	29.6407	1.96423e-06	1.99706e-05	-0.628949
Tnfaip8l2	Q9D8Y7	26.3588	26.1805	26.4708	26.2706	26.4432	26.3356	25.4906	26.0006	25.618	26.2077	25.4827	25.4778	0.00091563	0.00324447	-0.630356
Prcp	Q7TMR0	23.5751	23.4868	24.1181	23.7009	23.825	23.8182	22.4887	23.5993	23.3577	23.4718	23.1759	22.6312	0.0123866	0.0289945	-0.633233
Ndufa12	Q7TMF3	24.3161	24.3444	24.4939	24.5208	24.5722	24.539	24.0258	24.0136	23.589	24.196	23.6631	23.4875	0.000469342	0.00189151	-0.635235
Rfc5	Q9D0F6	26.6923	26.7879	26.9117	26.8637	26.8171	26.9631	24.9427	26.1466	26.4092	26.7966	26.5518	26.3717	0.0400407	0.0783252	-0.636211
Gusb	P12265	28.3834	28.4258	28.2832	28.5867	28.6575	28.3747	27.6246	28.1476	27.4954	27.8984	27.8256	27.8997	0.000176795	0.000827102	-0.636676
Asah1	Q9WV54	27.949	27.8052	27.9303	27.8868	27.9879	27.8832	26.976	27.3635	27.0974	27.4856	27.4344	27.2533	2.12161e-05	0.000142722	-0.638685
Eif1	P48024	27.6935	27.697	27.3734	27.5365	27.6942	27.7286	26.7542	27.0562	27.0398	26.7797	27.0928	27.162	3.24699e-05	0.000205315	-0.639788
Casp3	P70677	26.8309	26.5445	26.7322	26.5507	26.6768	26.6167	25.9208	26.1267	26.0315	26.4913	25.9764	25.5435	0.000698545	0.00259626	-0.643593
Cdk5	P49615	23.2604	23.1013	23.4551	23.1722	23.0098	23.1521	22.8853	22.2046	22.7144	23.2792	22.5865	21.5861	0.0254848	0.0533459	-0.649128
Rbx1	P62878	25.419	25.6977	25.4727	26.0284	25.5241	25.7143	24.7724	24.3602	25.2092	25.3235	25.19	25.0808	0.00366735	0.0103784	-0.653352
Mavs	Q8VCF0	25.7608	25.873	25.4731	25.4197	25.5762	25.8528	25.1687	24.6795	24.9285	24.938	25.2391	25.0793	0.000200569	0.000924111	-0.653749
Cstf3	Q99LI7	25.151	24.316	24.551	25.0496	25.3746	24.799	24.1243	24.0362	24.2238	24.6959	24.1366	24.0982	0.00608453	0.015963	-0.654352
Fkbp2	P45878	28.1772	27.6888	28.125	28.2243	28.5462	28.3273	27.4789	27.7396	27.4128	27.7354	27.2708	27.5249	0.000791666	0.00287215	-0.654395
Rtfdc1	Q99K95	23.83	24.1159	24.1681	23.8448	23.7514	23.6994	22.8877	23.4342	22.8506	23.3784	23.366	23.5648	0.00119006	0.00400076	-0.654688
Ndufab1	F6ZFT1	27.0678	27.2416	27.2748	27.1516	26.9539	26.7915	25.1021	26.4247	26.6342	27.098	26.7772	26.4997	0.0475469	0.090727	-0.657579
Etf1	Q8BWY3	29.6355	29.5477	29.6485	29.5137	29.6173	29.57	28.9024	28.7887	28.9004	29.0252	28.84	29.128	3.23732e-07	4.72875e-06	-0.658021
Hspa4	Q3U2G2	31.9167	31.9142	31.9309	31.8252	31.8767	31.8751	31.2325	31.143	31.3032	31.073	31.1962	31.4422	3.08605e-07	4.62907e-06	-0.658104
Ppp1r14b	Q62084	26.114	25.8449	26.0937	25.9813	25.8592	26.5141	25.5413	25.4007	25.3825	25.4418	25.2423	25.4485	0.000118251	0.000585135	-0.65835
Cars	Q9ER72-2	27.49	27.3889	27.4755	27.4718	27.6009	27.4897	27.0715	26.8474	27.0092	26.2522	26.8126	26.9597	0.000343163	0.00142771	-0.660686
Ndrg1	Q62433	25.4652	25.6222	25.4976	25.2172	25.4572	25.2484	24.9391	24.2083	24.9277	24.4631	25.0015	24.9788	0.00129876	0.00427741	-0.664861
Bcat1	E9Q4K3	24.4741	23.9797	23.7971	23.757	24.1058	24.0428	22.3313	23.1384	23.6502	23.6237	23.2016	24.2104	0.0382391	0.0757056	-0.666819
Arhgdib	Q61599	30.8067	30.8444	30.8766	30.8552	30.8919	30.8394	30.1054	30.1389	30.2938	30.0415	30.2242	30.3051	4.07107e-08	1.07669e-06	-0.667535
Dpp7	Q9ET22	26.1639	25.713	25.6786	25.7657	25.8106	25.7127	25.4527	25.2118	25.1807	25.0987	24.8369	25.0552	0.000127583	0.000624955	-0.668068
Mroh1	G3XA21	25.5656	25.1851	25.0259	25.4163	25.7462	25.7069	25.4462	24.7823	25.0761	24.6578	24.1578	24.5123	0.0118041	0.0279045	-0.668918
Blvra	Q9CY64	29.9316	29.8943	30.027	29.9289	29.9303	29.9297	29.2128	29.3056	29.2024	29.4622	29.2865	29.1577	6.99183e-08	1.55257e-06	-0.669107
Wdr81	K4DI77	24.8077	24.7393	24.4464	24.9442	25.5005	24.984	23.9031	24.4299	24.1253	24.5762	24.3492	24.0184	0.00364548	0.010334	-0.669991
Vps18	Q8R307	24.9673	24.3508	24.0587	24.8542	24.9553	24.6872	24.6195	23.8651	24.089	23.7885	23.5983	23.8911	0.00917584	0.0227526	-0.670324
Dynlrb1	P62627	26.8254	26.7563	26.7137	26.6255	26.7843	26.5564	26.015	25.9537	25.6999	26.1888	26.0574	26.3046	3.18389e-05	0.000202777	-0.673702
Ndufa9	Q9DC69	26.2769	26.2451	26.4614	26.2012	26.6133	26.3935	25.8703	25.7563	25.1621	26.1389	25.6823	25.5229	0.00107396	0.00369207	-0.676403
Gng2	P63213	26.4204	26.5403	26.6113	26.5697	26.5245	26.5559	25.9669	26.0227	25.9524	25.9539	25.6028	25.6385	6.67903e-06	5.44911e-05	-0.680824
Lman2	Q9DBH5	28.0655	27.9089	28.094	27.9733	28.068	28.1029	27.3303	27.4789	27.3659	27.3689	27.4446	27.138	3.63233e-07	5.1767e-06	-0.680999
Pola1	P33609	22.8065	22.645	22.7933	22.4595	22.427	22.7694	22.2622	21.8005	22.4938	21.7423	22.0229	21.4791	0.00211174	0.00652242	-0.683315
Abhd14b	A0A087WP24	24.5335	24.4605	24.3147	24.1888	24.3194	24.3427	23.7127	23.6285	24.0678	24.0309	23.3935	23.2166	0.000891462	0.00317566	-0.684916
2019-09-09	A2A6U3	26.4066	26.5032	26.5871	26.48	26.468	26.567	26.0434	25.8404	25.8313	25.671	25.6007	25.9013	2.02364e-06	2.04504e-05	-0.687303
Txndc17	Q9CQM5	26.8261	26.7575	26.8258	26.8526	26.6733	26.9711	25.9708	26.0234	26.174	26.179	26.4441	25.9879	9.12546e-06	7.03334e-05	-0.687854
Ctsa	G3X8T3	29.1528	29.2687	29.3757	29.2143	29.1981	29.2572	28.5206	28.5473	28.4803	28.412	28.7442	28.6337	2.92437e-07	4.42626e-06	-0.688118
Rps28	G3UYV7	30.1357	30.0771	30.3369	30.1458	30.1315	30.1448	29.3751	29.2892	29.4371	29.4763	29.4584	29.8065	6.81214e-06	5.53073e-05	-0.688193
Acadm	P45952	27.2496	27.2841	27.3253	27.2485	27.2896	27.1026	26.7779	26.3386	26.6071	26.5856	26.4113	26.6374	2.48206e-06	2.42055e-05	-0.690294
Fam175b	Z4YJY0	25.3374	25.4083	25.7058	25.4277	25.2459	25.3216	24.7261	24.4764	24.5107	25.0046	25.0218	24.5563	0.000177731	0.000830321	-0.691799
Sbds	P70122	26.652	26.3708	26.6814	26.1858	26.5841	26.6484	25.6202	25.539	25.8744	26.0078	25.6595	26.2493	0.000487055	0.00194184	-0.695363
LOC102642689	P14206	31.6722	31.6722	31.6799	31.651	31.7412	31.7334	30.9297	30.8373	31.0111	31.0123	30.9989	31.1815	5.5502e-08	1.30742e-06	-0.696511
Pcca	Q91ZA3	26.1259	26.3465	26.6454	26.3393	26.5594	26.4972	26.108	25.2224	25.8627	25.697	25.8674	25.5684	0.000740006	0.00271715	-0.697968
Ptgr1	Q91YR9	26.8744	26.827	26.8791	26.7733	26.9418	26.9234	25.9851	26.0201	26.3778	26.4727	26.0773	26.0959	1.09535e-05	8.17843e-05	-0.698352
Rad23b	P54728	27.3953	27.3421	27.4188	27.291	27.318	27.5929	26.5797	26.7834	26.5327	26.7718	26.8488	26.6084	1.31923e-06	1.43274e-05	-0.705559
Psma5	Q9Z2U1	29.4784	29.4923	29.514	29.3485	29.4564	29.4171	28.7013	28.7003	28.6204	28.6841	28.6937	29.0451	9.02473e-07	1.082e-05	-0.710261
Slc9a3r1	P70441	26.2328	26.0991	26.1128	26.0453	26.2024	26.0238	25.7589	25.2026	25.3229	25.4043	25.27	25.4901	1.09435e-05	8.17843e-05	-0.711229
Rps21	Q9CQR2	28.8463	28.9462	28.9586	28.9642	28.9461	28.9986	28.0035	28.1547	28.3276	28.2443	28.1711	28.4787	1.2629e-06	1.40346e-05	-0.713345
Mcee	Q9D1I5	24.8648	24.8586	24.8685	24.8301	25.1965	24.962	24.3311	24.5392	23.8045	24.2595	24.2429	24.1035	9.80245e-05	0.00050836	-0.716635
Capza2	P47754	29.7635	29.5786	29.6809	29.5931	29.6052	29.6919	28.9845	28.9901	28.8438	28.9408	28.6926	29.1311	8.63449e-07	1.05062e-05	-0.72173
Pura	P42669	24.754	24.8969	24.7467	25.1172	25.4918	25.0451	24.5345	23.8489	24.6571	24.143	24.2439	24.2902	0.00131587	0.00432377	-0.722357
Naa25	Q8BWZ3-2	26.3607	26.4927	26.0595	26.5852	26.3238	26.4838	25.7757	25.4769	25.9139	25.3602	25.6987	25.7458	7.79971e-05	0.000420129	-0.722406
Pcnp	Q6P8I4	27.6101	27.4008	27.5893	27.5475	27.522	27.4737	26.9826	26.8654	26.6815	26.4722	26.7478	27.0573	1.47924e-05	0.000105468	-0.722766
Acat2	G3XA25	27.681	27.5297	27.7514	27.6747	27.5797	27.6111	26.6655	26.7045	26.9768	27.0433	27.0119	27.0763	4.09622e-06	3.71324e-05	-0.724861
Stx17	Q9D0I4	22.427	22.5214	21.3487	22.5791	22.6625	22.4164	22.0708	21.6383	21.8531	21.7719	20.9163	21.3436	0.0191779	0.0421143	-0.726858
Bpnt1	Q9Z0S1	27.3924	27.2961	27.3933	27.2395	27.4569	27.2671	26.5656	26.3451	26.5756	26.6875	26.6869	26.798	1.44981e-06	1.54446e-05	-0.731096
Ppib	P24369	29.8835	29.7762	29.8973	29.8676	29.9148	29.9364	29.067	29.0639	29.1087	29.2451	29.1883	29.2067	3.80628e-09	2.33598e-07	-0.732696
Ndufv1	D3Z1U9	27.488	27.2887	27.54	27.5278	27.5213	27.5847	26.8859	26.8377	26.6195	26.6342	26.8494	26.7236	4.21312e-07	5.8235e-06	-0.73336
Aldh9a1	Q9JLJ2	29.7276	29.767	29.742	29.7306	29.7053	29.724	28.9839	28.8906	29.0506	29.002	28.9954	29.0731	1.1579e-10	3.02596e-08	-0.733478
Txnrd1	Q9JMH6-2	28.4238	28.3483	28.4305	28.3827	28.4704	28.4534	27.6952	27.661	27.6542	27.6167	27.5357	27.9285	1.50298e-07	2.66003e-06	-0.736309
Tshz3	Q8CGV9	26.667	26.3268	26.5674	26.283	26.4415	26.5978	25.4645	25.7578	25.5991	25.9384	25.8548	25.8484	1.80047e-05	0.000123921	-0.73676
Patl1	Q3TC46	22.7292	21.5007	22.3987	21.4633	21.5907	21.4514	21.4451	20.9413	21.034	20.2306	21.3309	21.7284	0.0397927	0.0780226	-0.737308
Npepl1	Q6NSR8	25.767	26.0747	25.7483	25.7844	25.831	25.6882	25.3975	25.2983	24.9112	24.5175	25.3021	25.0394	0.000485556	0.0019414	-0.737934
Pcna	P17918	30.9443	31.0841	31.0625	31.0163	31.1437	31.1023	30.2569	30.1938	30.3222	30.3148	30.4811	30.3545	3.28248e-08	9.30499e-07	-0.738347
Coq9	Q8K1Z0	25.0538	25.3098	25.2589	25.2732	24.866	24.9476	22.8907	24.4944	24.4353	25.1263	24.7782	24.551	0.0459412	0.088318	-0.738906
St13	F8WJK8	30.0984	29.9592	30.1707	30.0218	30.099	29.9562	29.159	29.2296	29.4317	29.2638	29.2531	29.5201	5.43941e-07	7.24893e-06	-0.741312
Vcp	Q01853	31.9787	31.9816	32.0451	31.9278	32.0112	32.0154	31.2049	31.1582	31.2109	31.2761	31.275	31.3698	1.0346e-09	1.08148e-07	-0.744125
Hdhd2	Q3UGR5	26.0348	26.3504	25.7176	26.2453	26.1693	26.1568	25.4083	25.2204	25.6321	25.1471	25.2632	25.5286	8.88919e-05	0.000466056	-0.745745
Cpd	O89001	23.2328	23.0627	23.1735	23.4506	23.2822	23.1449	22.9965	21.9727	23.4409	22.0197	22.1656	22.2748	0.0139828	0.032146	-0.746109
Rrm1	P07742	28.4999	28.4229	28.588	28.4337	28.5405	28.467	27.9654	27.6842	27.7802	27.847	27.8445	27.3432	1.05396e-05	7.97625e-05	-0.747898
Ndufa8	Q9DCJ5	26.2901	26.454	26.6559	26.4011	26.5144	26.2402	25.4875	25.8043	25.4557	25.8602	25.5653	25.8921	2.3649e-05	0.000156335	-0.748447
Dcxr	A2AC16	25.2896	25.8482	25.4415	25.5358	25.2897	25.2987	25.609	24.2957	25.108	24.6665	23.7637	24.7633	0.0215572	0.046582	-0.749557
Commd7	A2AU52	22.6991	22.8449	22.8461	23.3026	23.1191	22.0146	21.9897	21.6242	22.2572	21.8903	22.4311	22.1083	0.00565805	0.0150686	-0.75426
Pfdn1	Q9CQF7	26.211	26.2326	26.2068	26.1343	25.9789	25.9779	25.3604	25.5081	25.3673	25.4934	25.2242	25.2573	5.6994e-07	7.41809e-06	-0.755127
Tpd52l2	F6VQ81	26.4076	26.8379	26.5078	26.6089	26.458	26.328	25.4427	25.9506	25.9738	25.6717	25.769	25.763	3.56638e-05	0.000220674	-0.762885
Psmb7	P70195	28.2996	28.4249	28.4458	28.2512	28.4663	28.458	27.7458	27.4291	27.6602	27.4086	27.4858	28.0264	2.41604e-05	0.000158775	-0.764967
Dip2b	Q3UH60	24.9433	24.6225	24.8295	24.7731	25.6	25.4686	24.5136	23.9183	24.4586	24.2471	24.298	24.2074	0.00197418	0.00612582	-0.765674
Kif3a	Q3TET1	25.5226	25.186	24.5914	25.2539	25.5608	25.7923	25.2092	24.5806	24.9147	24.1001	24.2651	24.2359	0.0110896	0.0265341	-0.766919
Spr	Q91XH5	27.4467	27.6837	27.6592	27.6504	27.7242	27.5857	26.6284	26.9897	26.8802	26.7646	26.7384	27.1357	4.14978e-06	3.75163e-05	-0.768841
Ctsb	P10605	31.5561	31.4064	31.4505	31.5077	31.4085	31.5016	30.5976	30.6989	30.6624	30.6642	30.7944	30.7957	3.55157e-09	2.24151e-07	-0.769601
Timm13	P62075	27.5092	27.3663	27.5981	27.6029	27.2983	27.5136	26.5896	26.8202	26.6994	26.5234	26.479	27.1591	5.23899e-05	0.000301107	-0.769631
Elac2	B1ATP7	26.1634	26.0829	26.4054	26.1617	26.3953	26.336	25.0479	25.4225	25.5212	25.512	25.7016	25.7182	5.21533e-05	0.00030078	-0.770213
Timm8a1	Q9WVA2	27.6615	27.5243	27.8184	27.5177	27.466	27.6134	26.6185	26.7172	26.7828	26.8942	26.7804	27.1828	1.07539e-05	8.09997e-05	-0.770876
Arrb1	J3QNU6	25.9492	26.1024	25.9266	25.9257	25.7491	25.9189	25.0024	25.2237	24.7663	25.589	25.0359	25.3151	0.000104641	0.000534122	-0.773242
Sbno1	F7CVW0	24.1267	23.8191	23.8821	23.9042	24.0088	24.2271	23.7311	22.9492	21.7838	23.7094	23.6529	23.4754	0.0340167	0.0683398	-0.777699
Hrsp12	P52760	22.253	23.0882	23.8101	22.1688	22.9434	22.1907	21.5787	22.0319	21.5442	22.5771	22.2968	21.7523	0.0342971	0.068738	-0.778874
Naglu	O88325	25.7947	26.1308	26.1754	26.2292	26.119	25.9244	25.7494	25.0056	25.7042	25.1198	24.5788	25.5408	0.00298126	0.00873998	-0.779162
Nudt16l1	Q8VHN8	22.5585	21.7404	23.346	23.4817	22.3607	23.4601	21.7887	22.4863	21.989	21.8541	21.5991	22.5531	0.0412619	0.0805257	-0.779518
Eno1	P17182	34.8123	34.7596	34.8161	34.7673	34.7892	34.7759	34.0114	33.9444	33.9757	34.1031	34.0403	33.9383	6.37867e-11	2.13367e-08	-0.784534
Acaa2	Q8BWT1	27.1116	27.4432	27.3853	27.2792	27.1967	27.2154	26.3173	25.9964	26.6436	26.6315	26.5192	26.807	0.000112884	0.000567815	-0.78608
Pfdn6	Q03958	26.752	26.645	26.7382	26.6431	26.9932	26.7681	25.8877	25.8102	26.1853	26.0688	25.8931	25.9764	1.25493e-06	1.39924e-05	-0.786334
Atrx	Q61687	24.771	24.6359	24.6869	24.8973	25.1268	24.8918	23.704	23.8557	23.35	24.3901	24.6654	24.3097	0.00413248	0.0114525	-0.789107
Arpc4	P59999	30.2397	30.171	30.3104	30.1673	30.2163	30.2356	29.2081	29.3413	29.3255	29.7857	29.4835	29.4273	2.6103e-06	2.51627e-05	-0.79483
Brcc3	P46737	26.0394	25.9154	25.8699	26.1746	26.0901	25.9196	25.5519	25.319	25.3595	25.0025	24.3673	25.6302	0.00226867	0.00690509	-0.796404
Ncoa4	E9Q0D2	23.0607	22.6885	22.2944	22.4945	23.0235	22.6542	21.5613	22.3639	22.0035	21.6244	22.1306	21.7407	0.00111754	0.00380283	-0.798572
Mrpl19	Q9D338	25.0019	24.532	24.6173	24.6845	25.4129	24.8789	23.6881	24.0833	24.0154	24.4257	24.1462	23.9768	0.000667372	0.00252244	-0.798641
Gmpr2	Q99L27	26.6324	26.8208	26.958	26.4752	26.5384	26.8038	25.4392	26.0357	26.054	26.1017	26.0952	25.7021	0.000144297	0.000696497	-0.800112
Hadha	Q8BMS1	29.8317	29.7317	29.8973	29.814	29.9468	29.8815	28.9695	28.9424	28.9633	29.07	29.0058	29.2961	1.37048e-07	2.48267e-06	-0.809328
Capzb	P47757-2	29.7569	29.8545	29.8548	29.8031	29.8003	29.774	28.8793	28.9732	29.0389	28.846	29.0587	29.1824	3.07542e-08	8.79255e-07	-0.81083
9030617O03Rik	E9QMK9	26.7622	26.6432	26.9291	26.9379	26.9136	26.8532	25.4663	26.396	26.0021	26.1493	25.9653	26.1911	0.000148092	0.000713785	-0.811512
Ube2k	P61087	27.1002	26.7842	26.8525	27.0355	27.3622	27.0478	26.3864	26.1986	26.5294	25.6062	26.1884	26.3894	0.000406851	0.00166168	-0.813973
Hexb	P20060	28.5343	28.4513	28.5799	28.4176	28.3895	28.5711	27.6799	27.6493	27.5836	27.8362	27.5915	27.711	1.74597e-08	6.08361e-07	-0.81536
Tpp1	O89023	27.6353	27.507	27.6236	27.2149	27.8332	28.0843	27.2906	26.4568	26.8546	27.0497	26.4632	26.8905	0.00108772	0.00372026	-0.815472
Hcls1	P49710	28.4045	28.4234	28.2517	28.2545	28.0182	28.3178	27.3226	27.7255	27.4659	26.6231	27.6353	28.0048	0.00237642	0.00718077	-0.815489
Cux1	H3BJ26	22.5182	23.3832	21.8343	22.9119	23.3604	22.9531	22.1695	22.5779	21.6449	21.8443	21.6425	22.1874	0.0158207	0.0356126	-0.815769
Anxa11	P97384	26.844	26.7614	26.9229	26.737	26.709	26.5596	25.8429	25.8337	25.8881	25.9099	25.8606	26.299	3.3853e-06	3.16308e-05	-0.816598
Cops5	O35864	25.6346	25.6563	26.0331	26.3758	26.0273	26.0342	24.8152	24.718	25.4202	25.8151	24.939	25.1506	0.00246985	0.00742955	-0.817206
Erp29	P57759	28.9278	28.9676	29.1217	29.1779	29.2259	29.0442	28.2062	28.1564	28.2906	28.2145	28.1096	28.5598	1.46036e-06	1.55076e-05	-0.821356
Ndufs2	Q91WD5	26.6144	26.324	26.7078	26.6335	26.6118	26.8064	25.9533	25.8482	25.7494	25.7064	25.8112	25.6989	8.66879e-07	1.05062e-05	-0.821736
Arsb	P50429	25.442	25.4725	25.5868	25.212	25.5261	25.5952	24.4599	24.6445	24.6549	24.8884	24.6117	24.6368	1.29659e-06	1.42667e-05	-0.823086
Clip1	D3Z2Z1	24.9614	24.8166	25.083	25.1402	25.1988	25.1215	24.4044	23.9974	24.4963	23.9753	24.1402	24.3563	1.61086e-05	0.000112963	-0.825279
Nfu1	Q9QZ23	26.2656	26.0742	26.06	26.1323	26.4228	26.474	25.1329	25.3276	25.6591	25.8169	25.3958	25.1049	0.000121409	0.000598104	-0.831958
Psmb1	O09061	29.0535	29.3963	29.0777	29.4576	29.2814	29.2598	28.5447	28.3377	28.565	28.1124	28.4264	28.5477	6.95393e-06	5.63218e-05	-0.832069
Vbp1	Q3TIR6	26.2906	26.3651	26.5289	25.9357	26.2473	26.1338	25.0599	25.7073	25.4158	25.1698	25.2979	25.8537	0.000254392	0.00112707	-0.832832
Abca9	Q8K449	23.2848	22.7415	22.9895	23.1657	22.8744	23.0118	21.6961	22.2924	22.5954	22.3056	21.7152	22.4644	0.000779719	0.00284113	-0.833106
Skp1a	Q9WTX5	26.7542	27.0756	27.0086	27.2909	27.172	27.008	26.6982	26.0109	26.528	25.5779	26.0393	26.4499	0.00113754	0.00386073	-0.834174
Rab5b	P61021	24.2643	24.2956	24.1093	23.6891	23.7663	24.1181	23.5169	23.6721	22.5976	22.0771	23.452	23.9105	0.0216536	0.0466996	-0.836081
Pnpla7	A2AJ88-3	23.9417	24.0755	23.1051	23.6748	23.8373	23.4333	22.8993	23.2638	22.4256	23.2217	22.7887	22.452	0.00242075	0.00728838	-0.836092
Psma1	Q9R1P4	30.0598	30.1454	30.3179	30.1706	30.1539	30.1702	29.3432	29.2442	29.317	29.2193	29.3545	29.5173	2.99543e-08	8.71279e-07	-0.837057
Eif4e	P63073	28.2979	28.0371	28.2394	27.8733	28.0147	28.1503	27.1797	27.2807	27.2848	27.3779	27.0142	27.4311	2.52987e-06	2.46001e-05	-0.840712
Nif3l1	Q9EQ80	24.8427	25.6036	25.4122	25.9105	25.6556	25.6355	25.036	24.065	25.1163	24.2367	24.6948	24.8567	0.00433881	0.0118985	-0.842422
Mpi	Q924M7	22.8232	22.8853	23.2256	22.5044	22.8515	22.7724	22.0396	21.4708	22.609	22.5636	21.232	22.0851	0.00664643	0.0171811	-0.843699
Psma7	Q9Z2U0	29.9528	29.9905	29.9212	29.8609	30.0283	30.035	29.104	29.2089	29.1694	29.048	29.0209	29.1714	1.65412e-09	1.45606e-07	-0.844342
Gm5093	E9PZB3	25.1334	24.7127	25.1975	25.1339	25.4186	25.5528	23.3247	24.4312	24.2701	25.0603	24.7195	24.2703	0.00993331	0.0242002	-0.845456
Pitpnb	Q8JZZ5	25.1533	24.8663	25.4306	25.106	25.095	25.1934	24.0279	24.2376	24.1406	24.6182	24.5964	24.137	5.55115e-05	0.00031633	-0.847789
Lsm6	P62313	25.2573	25.3756	25.3746	25.5005	25.4106	25.2855	24.2997	24.6874	24.6654	24.1754	24.7843	24.5037	1.00361e-05	7.66454e-05	-0.848046
Lypla1	J3QP56	27.3445	26.9125	27.172	26.827	27.0805	27.2732	26.3479	26.2447	26.1722	26.354	26.0604	26.3339	4.66507e-06	4.12822e-05	-0.849412
Lrrc75a	Q7TSF4-2	22.7419	22.6328	22.9221	21.7039	22.0522	22.2902	21.8587	21.2961	21.0264	22.2001	21.5414	21.2853	0.00766493	0.0194531	-0.855837
Rexo2	Q9D8S4	25.2179	25.8007	24.7151	25.5705	25.4664	25.6978	25.416	24.1345	24.8635	24.0785	24.3622	24.4718	0.0085234	0.0213564	-0.856972
Eml4	F8WJ93	26.0017	26.0196	26.3681	26.2015	26.1362	26.3918	24.9796	25.074	25.2726	25.6729	25.4121	25.5237	5.10522e-05	0.000295961	-0.863997
Api5	O35841	28.6618	28.5213	28.5175	28.6216	28.57	28.6729	27.8116	27.7975	27.6834	27.7422	27.4782	27.8603	7.53097e-08	1.64648e-06	-0.865318
Ctc1	Q5SUQ9-2	23.4869	24.012	23.3531	24.0456	23.6794	23.46	21.8209	22.8115	23.2839	23.4293	22.8345	22.6629	0.00780325	0.0197442	-0.865645
Pnp	Q543K9	28.8509	28.7866	28.8915	28.6927	28.8043	28.8458	27.9047	27.6282	27.9852	27.8681	27.8812	28.3917	9.5187e-06	7.30276e-05	-0.868767
Dpysl2	O08553	29.8507	29.7755	29.9422	29.7303	29.807	29.7953	28.9524	28.7945	28.9658	29.0258	28.7923	29.1546	9.26897e-08	1.89053e-06	-0.869261
Cd63	P41731	26.7098	26.7852	27.4034	27.7223	27.8723	27.6554	25.9801	26.6554	26.3613	26.74	26.4222	26.7683	0.00429964	0.0118178	-0.870199
Basp1	Q91XV3	29.9534	29.7281	29.9195	29.8861	29.9393	29.9633	28.7584	29.3011	28.9642	29.0206	28.7772	29.3349	1.04397e-05	7.91852e-05	-0.872261
Psmb8	P28063	26.5507	26.7843	26.3762	26.6316	26.4096	26.6231	25.6274	25.7183	25.7053	25.5613	25.7002	25.8065	2.23311e-07	3.66202e-06	-0.876083
Tln2	E9PUM4	22.9064	23.1822	23.2286	23.0001	22.6566	23.2808	22.7642	22.0539	22.2491	22.1322	21.6416	22.1529	0.00056168	0.00219232	-0.876801
Hexa	P29416	28.2069	28.1726	28.3495	28.1761	28.2496	28.3836	27.2474	27.4178	27.1803	27.6152	27.3116	27.5017	4.34467e-07	5.96502e-06	-0.877381
Glod4	E9Q197	27.741	27.7519	27.6035	27.5184	27.4975	27.5686	26.6796	26.7343	26.6676	26.9133	26.6447	26.7627	4.41788e-08	1.12808e-06	-0.879791
Ndufa2	Q9CQ75	25.453	25.687	25.9724	25.7401	25.9367	25.8761	24.9222	24.9168	24.9121	24.9642	24.6918	24.9239	1.55966e-06	1.63545e-05	-0.88906
Ccdc124	Q9D8X2	23.3221	21.5565	22.6551	23.5796	23.3798	22.4486	21.6138	21.5659	22.5673	22.073	21.7331	22.0415	0.0280056	0.0580414	-0.891189
Anxa2	P07356	31.3792	31.2587	31.4118	31.2739	31.2397	31.2841	30.3706	30.4843	30.4139	30.2979	30.239	30.6926	2.02558e-07	3.40742e-06	-0.891512
Dcaf8	Q8N7N5	24.7752	25.3187	25.1158	24.9934	24.8893	24.7329	24.2293	23.6527	24.229	24.1538	24.4945	23.6988	0.00026195	0.0011499	-0.894498
Ndufs1	Q91VD9	28.1007	28.0677	28.2676	27.8296	28.1992	28.0691	27.4917	27.1222	27.106	27.4576	26.8955	27.0931	1.28228e-05	9.3856e-05	-0.894644
Sirpa	Q6P6I8	28.4381	28.5389	28.4282	28.4652	28.5392	28.3548	27.6518	27.5105	27.4931	27.5427	27.6087	27.5801	4.2836e-10	6.82316e-08	-0.896234
Lonp2	Q9DBN5	23.6238	22.5258	22.6081	22.6427	22.5967	22.778	22.8383	22.6159	21.7923	21.3337	21.4669	21.3378	0.0187605	0.0413671	-0.898349
Cdv3	A0A087WNP6	28.2683	28.2674	28.3302	28.1257	28.148	28.2338	27.253	27.1514	27.1996	27.3983	27.3382	27.6313	4.03106e-07	5.6418e-06	-0.900314
Lta4h	P24527	26.6971	26.6333	26.7967	26.7507	26.5307	26.6321	26.1691	25.6878	25.6534	25.7199	25.7321	25.6558	1.50327e-06	1.58626e-05	-0.903768
Arhgef6	F6WMJ3	24.5138	25.5703	25.6983	25.5919	25.9376	25.9375	23.5974	25.1014	24.5447	24.5048	25.2779	24.7913	0.0190658	0.0419023	-0.905296
Fhod1	Q6P9Q4	23.4492	23.7152	23.4595	23.6132	23.8667	23.9007	23.3438	23.535	23.0277	21.5889	22.6159	22.459	0.0127479	0.0296947	-0.905692
Creg1	O88668	27.5008	27.3757	27.442	27.3938	27.5959	27.3634	26.3692	26.6596	26.5076	26.6147	26.5114	26.5649	1.45557e-08	5.44937e-07	-0.907359
Sephs1	Q8BH69	25.5558	24.9276	24.8889	24.907	25.1011	25.0919	23.8193	24.3367	24.063	23.9476	24.4915	24.3684	0.000120626	0.000595494	-0.907632
Hddc2	Q3SXD3	23.3723	22.8213	23.8691	22.3472	22.6165	23.0377	21.7036	22.568	22.5825	21.4153	22.084	22.2325	0.011171	0.0266907	-0.913035
Pebp1	P70296	30.0478	29.8131	29.953	29.8743	30.0111	29.957	29.0634	28.8924	29.0614	29.0741	28.9097	29.1697	1.57486e-08	5.66441e-07	-0.914232
A230046K03Rik	Q3UMB9	23.5971	23.0463	23.6867	23.857	23.8805	24.1594	23.0209	22.9475	23.0067	22.0164	23.1541	22.5871	0.0026823	0.00792606	-0.915725
Ndufa4	Q62425	28.1632	28.0126	28.3566	28.0577	28.1679	28.1806	27.2655	27.2457	27.1021	27.3763	27.1754	27.2726	3.92264e-08	1.05816e-06	-0.916822
Efhd2	Q8C845	29.2984	29.2512	29.4092	29.1607	29.2703	29.2073	27.7767	28.4469	28.3229	28.8185	28.5367	28.1773	0.000100841	0.000519745	-0.919693
Psmg2	Q9EST4-3	25.6709	25.3157	24.8264	25.3947	25.8586	24.7276	23.8998	24.4613	24.492	24.649	24.3001	24.4695	0.00145924	0.00472067	-0.920397
Lipa	Q9Z0M5	26.3848	26.8813	26.6087	27.2337	27.0727	26.6559	26.8979	25.598	26.8601	24.9845	24.8181	26.1468	0.039903	0.0781922	-0.92195
Sars	Q8C483	30.1314	30.158	30.1895	30.0605	30.0444	29.8907	29.0885	29.0629	29.1989	29.1021	29.0698	29.3977	9.88072e-08	1.95568e-06	-0.925765
Msn	P26041	31.7866	31.8588	31.7588	31.8139	31.7853	31.7401	30.8713	30.83	30.8981	30.5709	30.74	31.2768	2.44866e-06	2.39497e-05	-0.926065
Psmb9	P28076	24.5691	23.6878	24.4857	23.6335	24.1359	24.1644	23.5781	23.8313	23.0393	23.3727	23.526	21.7623	0.0221297	0.0474992	-0.927787
Sarnp	Q9D1J3	28.2594	28.1169	28.1661	27.9628	28.0611	28.0379	27.147	27.1865	27.1031	27.1906	26.8661	27.4871	1.3072e-06	1.43056e-05	-0.937349
Grhpr	Q91Z53	26.2892	26.3576	25.9859	25.8976	25.9583	26.2523	25.1407	25.6448	25.4557	24.3241	25.0452	25.4777	0.00118589	0.00399477	-0.942147
Cd36	Q08857	28.4019	28.2774	28.4691	28.3216	28.7032	28.5654	27.3322	27.5738	27.4795	27.7054	27.4647	27.5164	4.42131e-07	6.01759e-06	-0.944446
Mrps25	Q9D125	24.813	23.801	25.1101	25.3052	25.8441	25.1927	24.3223	24.3621	24.2157	23.8481	23.8468	23.7994	0.0100023	0.0243328	-0.945282
Ifi30	Q9ESY9	27.0059	27.2314	27.3353	27.3765	27.294	27.259	25.8746	26.3597	26.7515	26.3701	26.3553	26.1146	2.87452e-05	0.000184928	-0.94607
Calm1	P62204	31.0007	31.0111	31.0603	31.1047	31.0451	31.0786	30.0679	30.0467	30.0497	29.9638	30.1823	30.3076	5.85778e-09	3.10918e-07	-0.947096
Pik3r1	P26450	24.3355	24.2428	24.0754	23.9847	24.303	24.5262	22.1126	22.3368	23.8572	23.8351	24.7394	22.8921	0.0485624	0.0921913	-0.949045
Ephx1	Q9D379	28.0713	28.013	28.1468	28.1775	28.1984	28.1788	27.1705	27.206	27.2521	27.3514	26.9996	27.0922	1.56116e-08	5.66441e-07	-0.952323
Fkbp1a	P26883	28.5637	28.5801	28.4008	28.2244	28.4867	28.2626	27.3272	27.3127	27.706	27.3917	27.4352	27.6287	1.02268e-06	1.19194e-05	-0.952817
Psma4	Q9R1P0	29.5892	29.4743	29.3993	29.5102	29.5179	29.5526	28.441	28.5691	28.5612	28.5032	28.4486	28.7704	1.0292e-08	4.43643e-07	-0.958339
Psma6	Q9QUM9	29.8551	29.7285	29.8686	29.7282	29.6801	29.7438	28.6523	28.7607	28.715	28.9431	28.7581	29.0136	4.13147e-08	1.07669e-06	-0.960262
Fam136a	Q9CR98	25.9311	25.9055	26.3253	25.7968	26.3668	26.0943	24.969	25.227	24.8205	24.6457	25.1425	25.8487	0.000624148	0.00239424	-0.96106
Serpinb6a	Q60854	28.2183	28.4913	28.334	28.5717	28.404	28.5136	27.4921	27.3175	27.3755	27.321	27.3277	27.9151	4.90985e-06	4.31062e-05	-0.963987
Gm21596	P63158	28.7189	28.9032	28.8711	28.3154	28.7179	28.8976	27.7759	28.0312	27.8848	27.1163	27.5989	28.217	0.000334095	0.00140105	-0.966643
Arhgap18	Q8K0Q5	24.6607	24.7741	24.4901	24.9226	25.1938	24.8748	23.9524	23.6078	23.5305	23.7293	24.0804	24.2063	6.46443e-05	0.000359793	-0.968217
Adsl	P54822	28.432	28.4976	28.5828	28.4498	28.5933	28.5629	27.5027	27.4164	27.5732	27.597	27.4306	27.7767	2.09034e-08	6.85509e-07	-0.970299
Vwa8	Q8CC88	25.9539	25.7272	25.464	25.5822	25.8569	25.2022	25.7617	24.2502	25.2858	23.671	24.7315	24.2542	0.0150208	0.0341568	-0.972017
Isyna1	Q9JHU9	27.1859	27.0022	27.1603	26.9995	27.1771	27.1193	26.0701	25.9372	26.2668	26.0362	25.9554	26.5381	2.09231e-06	2.10807e-05	-0.973412
Capza1	Q5RKN9	29.2517	29.1591	29.2154	29.2614	29.1988	29.3316	28.2222	28.2456	28.0619	28.3789	28.1566	28.4947	5.28586e-08	1.27203e-06	-0.976355
Cisd3	Z4YKM2	25.7659	25.5265	25.1623	25.6718	25.1671	25.3335	24.5822	23.9837	24.403	24.4896	24.6652	24.6413	5.84257e-05	0.00033039	-0.97704
Grn	Q3U9N4	26.0068	25.7239	25.9237	25.991	26.0371	25.8456	24.8609	25.637	24.3949	25.345	24.8819	24.5328	0.000612537	0.00235781	-0.97928
Dnajb4	Q9D832	23.5971	23.3788	23.3316	23.0282	22.8451	23.2664	22.001	22.46	22.4304	21.5814	22.3792	22.7181	0.000583201	0.00226574	-0.97949
Dnah17	A2A520	24.4688	24.2674	24.4823	24.63	24.7324	24.561	23.3449	23.2343	23.755	24.1025	23.1906	23.6316	0.000101993	0.000523261	-0.980485
Scp2	P32020-2	27.8118	27.6647	27.8042	27.7336	27.664	27.8237	26.8394	26.5752	26.7273	26.5992	26.6429	27.2266	2.72704e-06	2.61374e-05	-0.981881
Pomp	Q9CQT5	22.7903	22.5876	22.8997	22.3992	23.1977	23.29	21.635	22.273	21.8473	22.0794	21.4067	21.9487	0.000367528	0.00151776	-0.995709
Eif3j1	Q3UGC7	27.8024	27.7039	27.8987	27.8285	27.6581	27.7566	26.8874	26.6288	26.8579	26.5034	26.7893	26.9824	2.18541e-07	3.61891e-06	-0.999808
Nit1	Q8VDK1-2	24.2214	24.5344	23.8477	24.2676	24.1299	24.2244	23.5621	23.4843	24.3739	22.2394	22.0375	23.5207	0.0234256	0.0496884	-1.00123
Ndufs6	P52503	26.1293	26.1648	26.3615	26.2942	26.4203	26.1954	25.1565	25.4355	24.8511	25.5023	25.3672	25.238	3.01173e-06	2.85389e-05	-1.00248
Tsn	Q62348	27.7588	27.5918	27.62	27.531	27.5827	27.6381	26.8381	26.4679	26.806	26.4031	26.5029	26.6523	2.03732e-07	3.40742e-06	-1.00867
Hadhb	Q99JY0	28.4569	28.4572	28.4173	28.3912	28.7854	28.5468	27.6863	27.5397	27.5924	27.0276	27.4082	27.7398	8.10601e-06	6.41351e-05	-1.01015
Psmb3	Q9R1P1	28.791	28.624	28.7454	28.4406	28.5012	28.6083	27.4026	27.6638	27.4915	27.7922	27.564	27.7313	2.24649e-07	3.66562e-06	-1.01085
Sumo2	H7BWX9	28.5106	28.3485	28.3955	28.2835	28.1875	28.3671	27.6448	27.2776	27.267	27.2342	27.3335	27.2233	1.41178e-07	2.52535e-06	-1.01869
Pla2g15	Q8VEB4	25.9958	25.9174	25.7304	25.6262	25.7444	25.8561	24.5789	25.0585	24.5986	24.3759	24.9415	25.2024	3.12545e-05	0.000199516	-1.01908
Hn1	P97825	26.7847	26.6277	26.6192	26.5029	26.4926	26.2943	25.2739	25.3344	25.6095	25.6745	25.1565	26.1411	8.51445e-05	0.00045136	-1.02192
Ncapd2	Q8K2Z4	25.8254	25.6008	25.2	26.0209	26.1945	25.7819	25.0794	24.7209	25.0843	24.2299	24.613	24.7475	0.000334328	0.00140105	-1.02474
Akr1b8	P45377	25.0597	25.3492	24.7837	25.1989	24.8423	25.382	24.3035	23.8183	24.3117	24.5919	23.7371	23.6918	0.000239177	0.00106531	-1.02693
LOC105247253	Q9CWW6	25.0508	25.2156	24.6665	24.7452	24.2318	25.1814	24.2383	23.5206	24.1781	22.4335	23.9719	24.5369	0.0132419	0.0306959	-1.03536
Ahnak	E9Q616	30.8474	30.8464	30.949	30.9738	30.9229	30.9469	29.764	29.9477	29.8575	29.8643	29.8236	30.0087	2.85987e-10	5.03487e-08	-1.03679
Tagln2	Q9WVA4	31.3975	31.4671	31.5138	31.4352	31.4	31.288	30.2118	30.3434	30.4513	30.2294	30.2985	30.7351	2.62291e-07	4.05248e-06	-1.03868
Itm2b	O89051	22.7337	22.9319	22.6498	22.863	23.5064	22.7998	21.8376	21.5679	22.5315	21.8975	21.541	21.8613	0.000293877	0.00126352	-1.0413
Tmem206	Q9D771	24.6343	24.2699	24.5102	24.8412	25.0055	24.4034	21.6801	23.9737	23.6155	24.4275	23.734	23.9616	0.0287271	0.0592066	-1.04539
Ndrg3	Q8CBD0	23.5644	22.6339	23.1419	23.0273	23.3655	23.5982	22.0943	21.9655	21.7388	22.6033	22.2266	22.4181	0.00032956	0.00139189	-1.04743
Necap2	Q9D1J1	24.745	24.8922	24.9132	24.5457	24.2097	24.6933	22.688	22.5539	24.2301	24.0837	23.9856	24.1664	0.0106854	0.0258069	-1.04859
Lsm2	O35901	26.4314	26.1417	26.5725	26.4834	26.5563	26.4271	25.0261	24.9115	25.716	25.5564	25.1599	25.9225	0.000149401	0.000716997	-1.05334
Psmb2	Q9R1P3	28.6737	28.7304	28.7264	28.7056	28.685	28.6428	27.5571	27.4974	27.6977	27.6282	27.5234	27.8987	1.04103e-08	4.43643e-07	-1.06022
Ppat	Q8CIH9	25.6497	25.3401	25.4967	25.6204	25.6159	25.4539	25.0344	22.7419	24.6716	24.7434	25.0973	24.5178	0.0145616	0.0331802	-1.06171
Tpp2	Q64514-2	28.4094	28.1868	28.4332	28.2358	28.3844	28.3573	27.2044	27.2797	27.3337	27.2648	27.1405	27.4012	3.24648e-09	2.16368e-07	-1.06375
Hmbs	P22907-2	26.1047	25.875	25.6995	25.8681	25.994	25.8063	24.8259	24.8653	25.0757	24.5524	24.6574	24.9832	7.97485e-07	9.86511e-06	-1.06461
Polr2c	Q99M46	25.7228	25.6736	25.5942	25.8401	25.8773	25.6033	25.1465	24.6896	24.4142	24.2456	24.7732	24.6401	1.3788e-05	9.93986e-05	-1.06702
Psma2	P49722	29.5209	29.4137	29.4779	29.3467	29.3822	29.4703	28.2524	28.2458	28.2375	28.4132	28.4037	28.655	3.56469e-08	9.93659e-07	-1.06734
Mcl1	P97287	24.8027	24.8204	24.3561	25.0468	25.6613	24.849	23.9234	23.7159	23.6509	24.0235	23.7785	24.0333	0.000190971	0.00088599	-1.06847
Gsto1	O09131	29.0185	29.0011	29.0013	28.9541	28.9392	29.1314	27.815	27.9569	27.9973	27.8275	28.0283	28.0025	6.19533e-10	8.28935e-08	-1.06968
Anxa1	P10107	29.9446	29.9129	30.0548	29.8635	29.9555	29.9375	28.6955	28.8835	28.9217	28.8743	28.7898	29.0546	3.14773e-09	2.16368e-07	-1.0749
Hmgb2	P30681	29.5991	29.7711	29.6441	29.6086	29.5361	29.5576	28.5541	28.4947	28.4124	28.5895	28.4939	28.7137	2.29825e-09	1.8304e-07	-1.07638
Set	A2BE93	30.7364	30.6332	30.5574	30.6634	30.4963	30.5041	29.599	29.5464	29.3873	29.3319	29.4055	29.839	1.83477e-07	3.14734e-06	-1.0803
Set	Q9EQU5-2	27.0059	26.3591	26.8636	27.4398	27.6348	27.3511	24.5624	24.3803	25.1503	25.2603	24.179	25.3984	1.0439e-05	3.14734e-06	-1.0803
Zfp706	Q9D115	25.2897	25.4615	25.5401	25.279	25.5234	25.6096	24.312	24.2934	24.5086	24.6508	24.3162	24.1391	3.81597e-07	5.40865e-06	-1.08054
Zbed5	D3Z5B1	26.6738	26.5657	26.612	26.4473	26.5445	26.7145	25.7161	25.5028	24.9704	25.3232	25.4706	26.0862	4.46743e-05	0.000264553	-1.08144
Uba5	F6VRI6	23.6193	24.1583	24.3108	23.3079	22.8853	23.5769	21.5665	21.5393	23.4166	23.318	22.9996	22.5156	0.0234061	0.0496785	-1.08382
Nudc	O35685	29.4947	29.2833	29.4545	29.3063	29.4193	29.4567	28.0519	28.1803	28.3357	28.5747	28.322	28.4408	1.37308e-07	2.48267e-06	-1.08491
Hist2h2ab	Q64522	25.2796	25.2705	25.1859	24.9761	25.0161	24.9692	24.2337	24.608	24.3546	21.8012	24.5673	24.6176	0.0379211	0.0751458	-1.08583
Osbpl9	Q5FWX7	23.0559	23.3062	23.5823	23.5445	23.4376	23.4701	21.5567	22.0703	22.4313	22.9282	23.0984	21.79	0.0021211	0.00653924	-1.08694
Hpcal1	P62748	25.5986	25.2886	25.7268	26.14	26.2461	25.9363	24.6316	24.3604	24.5966	25.3373	24.9392	24.4866	0.000334464	0.00140105	-1.09744
Hspbp1	Q99P31	27.0731	27.0419	27.0599	27.1297	27.2763	27.1363	24.9794	25.9086	26.222	26.2079	26.3866	26.4274	0.000628126	0.00240398	-1.09754
Prph	G5E846	23.5058	23.2299	23.4086	23.148	23.1157	21.6433	22.7742	21.4365	21.7496	21.6059	22.1291	21.77	0.00933215	0.0230547	-1.09766
Arhgdia	Q99PT1	31.8733	31.8497	32.0236	31.8671	31.9485	32.0001	30.6905	30.8123	30.8769	30.8399	30.7477	30.978	1.00542e-09	1.08148e-07	-1.10284
Psme1	G3UXZ5	30.1466	30.0328	30.208	30.1109	30.1169	30.1337	28.9653	28.8542	29.0111	28.9618	28.9585	29.365	4.65286e-08	1.1444e-06	-1.10549
Sash3	Q8K352	24.9019	24.6432	24.7009	24.5274	24.7522	24.5695	22.0428	24.4548	24.7256	23.656	24.2103	22.3616	0.0377186	0.0748609	-1.10733
Psmb6	Q60692	29.2424	29.1385	29.1231	29.0803	28.9725	29.0948	27.9474	27.8994	28.0982	27.8986	27.8227	28.3116	8.74335e-08	1.82791e-06	-1.11227
Ak2	Q9WTP6-2	28.7233	29.1142	29.0468	29.0591	29.1061	29.1293	27.805	27.7347	28.0113	27.7212	27.7412	28.3991	4.21314e-06	3.79626e-05	-1.12774
Gsn	P13020-2	29.8191	29.7128	29.8606	29.7431	29.6723	29.7094	28.5349	28.5952	28.569	28.7876	28.6542	28.6091	3.45494e-10	5.77839e-08	-1.12787
LOC102641751	P63280	27.3423	27.9189	27.3839	27.5331	27.6619	27.4742	27.0062	26.1229	26.6047	26.1465	26.2084	26.4202	4.20212e-05	0.000252442	-1.13424
Ufm1	P61961	26.2253	26.1136	26.0487	25.9096	26.1818	26.1494	24.7272	24.9833	24.8462	25.0757	24.824	25.3618	7.06312e-07	8.94929e-06	-1.13503
Psma3	O70435	29.6784	29.5221	29.6354	29.7055	29.7025	29.6062	28.2982	28.3932	28.5353	28.6023	28.4314	28.7728	3.07121e-08	8.79255e-07	-1.13613
Carnmt1	Q80UY1	24.4987	24.1059	23.4463	23.843	23.3027	23.8002	22.9067	21.4532	23.119	23.4458	22.5505	22.703	0.00648186	0.0167946	-1.13645
Psap	E9PZ00	30.0266	30.1881	30.146	30.3514	30.5234	30.3006	28.8045	29.1343	29.1373	29.3538	29.1999	29.0778	6.01053e-07	7.73278e-06	-1.13808
Prkaca	P05132-2	25.5381	25.3728	25.2612	25.2418	25.5653	25.6067	24.8697	24.7651	22.1637	24.6126	24.8076	24.5347	0.0253539	0.0531383	-1.13873
Pacsin2	Q9WVE8	24.2536	25.1054	24.4201	24.3835	24.2291	25.7697	22.4058	23.8149	24.4167	22.887	23.7531	24.0426	0.0168998	0.0376866	-1.14022
Cat	P24270	30.4126	30.2815	30.5022	30.4294	30.4055	30.4596	29.1637	29.322	29.2008	29.3411	29.2624	29.3307	1.26647e-10	3.02596e-08	-1.14501
Hdgf	P51859	29.1592	29.0282	29.3809	29.1491	29.2057	29.2745	28.0589	27.8905	28.059	28.1213	27.9704	28.218	1.07429e-08	4.43643e-07	-1.14657
Psph	Q99LS3	26.7252	26.4071	26.6137	26.5959	26.4779	26.7561	25.3449	25.3304	24.9702	25.9814	24.7852	26.2481	0.000692644	0.00258006	-1.15261
Pfas	Q5SUR0	28.7069	28.5337	28.7064	28.5382	28.4763	28.5179	27.4325	27.3449	27.3481	27.4275	27.1642	27.8001	2.50606e-07	3.95736e-06	-1.16037
Kif23	E9Q5G3	23.7023	24.2754	24.178	23.7603	24.4387	24.3209	23.3768	23.1917	21.8251	23.4147	22.3264	23.5725	0.00417405	0.0115295	-1.1614
Anapc2	Q8BZQ7	24.6163	24.7361	24.8599	24.442	24.6933	24.6031	24.2308	22.0198	22.924	24.1336	24.2278	23.4282	0.0102866	0.0249339	-1.16443
Cds2	F6S4G2	23.0779	23.3247	23.3909	23.9639	23.9895	24.0584	22.7512	21.3764	22.3335	22.9005	22.0477	23.3851	0.00587842	0.0155043	-1.1685
Lsm7	Q9CQQ8	25.279	25.0963	25.2021	24.9798	25.0868	24.9544	24.8418	24.4434	22.7154	24.5914	22.3218	24.6618	0.0277454	0.0576578	-1.17045
Ythdf3	Q8BYK6	28.1252	28.1977	28.2957	28.1389	28.2003	28.0267	27.0604	26.872	26.9751	26.9987	26.8107	27.2439	1.66006e-08	5.90735e-07	-1.17063
Manf	Q80ZP8	27.5887	27.6137	27.8458	27.6517	27.681	27.8177	26.0024	26.4133	26.4479	26.879	26.5464	26.8589	7.61976e-06	6.11226e-05	-1.17513
Prdx2	Q61171	30.1868	30.0911	30.2591	30.1287	30.2966	30.1772	28.914	28.906	29.0027	29.1585	28.9124	29.1885	3.29889e-09	2.16368e-07	-1.17622
Clpx	Q6P8N8	26.2383	26.4746	26.5215	26.7501	26.5719	26.9978	24.955	25.5164	25.328	25.1236	25.5188	26.0367	8.71842e-05	0.000460232	-1.17929
Cbr4	Q91VT4	24.127	24.4423	24.11	24.1975	24.3414	23.8454	21.6789	23.6726	23.5999	21.4843	24.0142	23.5324	0.0284278	0.0587076	-1.18022
Picalm	Q7M6Y3-2	27.2385	27.3781	27.2138	27.335	27.077	27.2275	26.4659	26.245	26.6196	26.1314	26.4636	26.753	1.58082e-05	0.0231914	-1.18204
Picalm	Q7M6Y3-4	23.9925	23.8998	23.7459	23.2443	23.6967	21.7877	21.8683	22.6437	21.8309	22.625	22.2547	22.052	0.00940674	0.0231914	-1.18204
Macrod1	Q922B1	24.1657	24.3038	24.7117	24.8514	24.7318	24.8587	23.5834	22.152	23.9411	23.9517	23.5439	23.3446	0.00256732	0.00764028	-1.1844
Tpd52	D3Z637	27.2449	27.066	27.294	27.0152	26.9444	27.1385	25.8065	26.0948	25.8238	25.9684	25.9133	25.9725	1.11027e-08	4.47452e-07	-1.18729
Gmfg	Q9ERL7	23.4473	24.2394	23.901	23.9602	24.0182	23.7734	22.4113	22.6807	22.7912	22.6471	22.6749	23.004	4.81253e-06	4.23629e-05	-1.18841
Actn4	P57780	30.8146	30.7351	30.6475	30.6448	30.7269	30.7304	29.2484	29.5484	29.4941	29.5838	29.4108	29.8493	7.00863e-08	1.55257e-06	-1.19408
Anxa4	P97429	29.3831	29.3619	29.358	29.3914	29.32	29.3637	28.103	28.1856	28.108	28.2062	27.9657	28.4312	4.14443e-09	2.43812e-07	-1.19641
Lancl1	O89112	24.6868	21.5464	22.6461	24.1182	23.9184	23.9146	22.4247	21.794	22.1936	22.7539	22.0959	22.3772	0.0345717	0.0692055	-1.19853
Grcc10	O35127	25.1505	24.5177	25.0749	24.7295	24.932	25.0224	23.8439	23.6938	23.9065	23.6759	23.2954	23.8177	3.90923e-06	3.58257e-05	-1.19894
Ccdc50	F6UK66	23.8003	23.9718	23.0411	24.3131	24.2104	24.2961	22.9474	22.5255	22.8301	23.8526	22.1148	22.1362	0.00442844	0.0120991	-1.20433
Rnaseh2a	Q9CWY8	25.1623	25.0217	25.246	24.6027	25.3752	25.0551	24.4583	22.1357	23.5477	24.3641	24.5769	24.074	0.0110377	0.0264478	-1.21773
Itpa	Q9D892	26.8554	26.7352	26.469	26.603	27.1022	27.0309	25.8191	25.2941	26.0295	25.3263	25.3443	25.6747	1.83655e-05	0.000126145	-1.21793
Stk38	Q91VJ4	24.1582	23.3727	24.0669	23.6894	23.8973	24.1262	23.4783	21.433	23.0862	24.0361	22.0221	21.9403	0.0184355	0.0407311	-1.21911
Npc2	Q9Z0J0	29.1806	29.2259	29.3128	29.1773	29.7463	29.1644	27.303	28.4842	28.1916	28.393	28.0615	27.9759	8.6385e-05	0.000457212	-1.23301
Csf1r	P09581	23.4026	23.5533	23.5091	22.8121	23.46	23.4778	21.9914	22.6581	22.0979	21.611	21.9721	22.4642	7.00432e-05	0.000382751	-1.23669
Map1lc3b	M0QWC2	22.1872	23.1502	24.0393	23.6823	23.9464	23.0882	21.8867	22.4419	21.5522	22.6672	22.4886	21.6273	0.00489052	0.0131926	-1.23826
Gm4737	P50247	30.3083	30.2401	30.2983	30.2103	30.2589	30.212	28.8561	28.9173	29.0104	28.9999	28.9739	29.3328	6.9187e-09	3.17028e-07	-1.23961
Anxa5	P48036	30.6675	30.627	30.6686	30.6082	30.6262	30.6255	29.2184	29.3638	29.4205	29.4164	29.3281	29.6346	9.76336e-10	1.08148e-07	-1.24021
Ints7	Q7TQK1-2	24.7929	24.9466	25.12	24.9257	25.0172	24.6503	22.9388	23.6867	23.8073	24.0107	23.4512	24.1116	5.84725e-05	0.00033039	-1.24107
Gss	Q3UEE2	23.1909	22.9357	23.5077	23.262	23.7145	23.2582	21.5919	22.4498	21.6232	22.3874	22.1	22.2406	5.97992e-05	0.000336748	-1.24602
Cul3	E9Q4T8	24.7907	25.0145	24.8579	24.73	25.3983	24.9921	23.2664	23.7066	23.8634	23.7387	23.6957	24.0206	5.12224e-06	4.4046e-05	-1.24869
Smpdl3a	P70158	26.2871	26.1956	26.3603	26.0848	26.1099	26.1766	23.9139	24.7832	24.939	26.2441	25.1618	24.677	0.0025875	0.00768667	-1.24924
Scly	Q9JLI6	26.68	26.7394	26.6292	26.6137	26.9067	26.9024	25.4669	25.1165	25.3383	25.4051	25.6331	25.9956	2.78091e-06	2.65776e-05	-1.25266
Tmf1	B9EKI3	24.68	22.2575	24.3481	21.7912	24.1275	23.7979	22.0714	22.1801	22.1301	22.4639	22.5117	22.0918	0.0283167	0.0585772	-1.25889
Arf5	P84084	23.5206	24.0026	25.0715	24.2481	24.7983	23.6927	23.8167	21.784	23.4984	22.2575	23.1814	23.1931	0.0104678	0.0253181	-1.26715
Incenp	Q9WU62-2	24.6369	24.151	23.9345	23.9252	24.3819	24.247	22.5679	23.6587	21.4097	24.0459	21.5422	24.423	0.0403041	0.0787485	-1.27153
Prdx6	Q6GT24	29.6741	29.65	29.7046	29.5682	29.6088	29.6463	28.348	28.3083	28.3412	28.2349	28.2834	28.643	1.61556e-09	1.45606e-07	-1.28219
Dnpep	Q3TVK3	25.9839	25.9144	26.2832	25.8623	25.5247	25.9259	24.6009	24.8031	24.7204	24.8937	24.8211	23.957	2.2238e-05	0.00014907	-1.28303
Ctps2	P70303-3	24.7879	24.6552	24.8684	24.4389	24.5604	24.2348	21.8707	21.7141	23.2952	24.6171	24.3199	24.0097	0.0328365	0.0664478	-1.28648
Cap1	P40124	31.8429	31.8742	31.7631	31.8032	31.7845	31.8622	30.5574	30.4256	30.6788	30.3053	30.4069	30.7696	8.2746e-09	3.64191e-07	-1.29777
Sqrdl	Q9R112	27.626	27.6026	27.7156	27.6602	27.8761	27.7071	25.909	26.4441	26.3392	26.7402	26.5174	26.4458	7.19585e-07	9.08306e-06	-1.29867
G6pdx	Q00612	30.4161	30.4002	30.4612	30.319	30.393	30.451	28.9708	28.9887	29.1097	29.1667	28.9685	29.4213	8.06457e-09	3.5968e-07	-1.30248
Gstm1	P10649	28.5586	28.6162	28.7976	28.7874	28.8788	28.8016	27.2473	27.4417	27.5076	27.0831	27.5804	27.7055	2.11968e-07	3.52752e-06	-1.31241
Rac1	Q3TLP8	27.162	27.5938	27.5091	27.7255	27.3357	27.1631	25.9221	26.115	26.2034	25.9612	25.7701	26.6005	5.6765e-06	4.79575e-05	-1.31949
Ppt2	E9Q0T0	24.9786	24.5243	24.8433	24.8298	24.7713	24.5801	21.8172	24.4685	24.0833	24.2523	21.7931	24.1747	0.0295554	0.0607639	-1.32304
Gm10705	P68037	29.5845	29.4075	29.6779	29.5316	29.5992	29.5685	28.1337	28.1654	28.2065	28.4393	27.9888	28.4742	2.32575e-08	7.40917e-07	-1.32688
Hic2	Q9JLZ6-2	28.8416	28.8527	28.9005	28.6543	28.6177	28.5683	27.5965	27.4062	27.1424	27.2506	27.4671	27.5263	4.13825e-08	1.07669e-06	-1.341
Mical1	Q8VDP3-2	24.2508	25.1042	24.4186	24.3606	24.7667	24.8534	21.9128	23.9046	24.8927	21.803	23.4725	23.7122	0.0251626	0.0527706	-1.34276
Raf1	Q99N57	28.6169	28.5463	28.8098	28.6845	28.73	28.8504	26.891	27.4104	27.3136	27.7953	27.542	27.2124	1.48456e-06	1.57147e-05	-1.34552
Fcgr3	E9PUV2	25.2446	25.363	25.2248	24.9876	25.1013	26.2655	24.0437	24.1535	23.8684	23.9118	24.1931	23.891	4.2036e-05	0.000252442	-1.3542
Ndufv2	Q9D6J6	26.0419	25.9431	26.1489	26.0725	26.2241	26.2791	25.1357	25.3202	25.5733	25.0413	22.0878	25.3583	0.0301043	0.0615518	-1.36551
Gdi2	Q61598	31.3768	31.3272	31.3294	31.3401	31.3652	31.3498	30.0545	29.8968	30.0061	29.9097	29.8411	30.1765	1.20095e-10	3.02596e-08	-1.36727
Ddb1	Q3U1J4	29.024	28.9474	29.0433	28.9895	29.074	29.1594	27.4371	27.6039	27.7042	27.7238	27.6977	27.8494	1.08136e-09	1.09611e-07	-1.37023
Pkm	P52480	34.4989	34.4872	34.5594	34.4518	34.4459	34.4274	33.0341	32.9536	33.1801	32.958	32.9617	33.5449	5.9313e-08	1.36829e-06	-1.37307
Pkm	P52480-2	26.87	26.8542	26.7829	26.8137	26.7944	26.773	25.1784	24.8733	24.9046	25.3177	24.5031	25.3659	1.09606e-07	1.36829e-06	-1.37307
Ech1	O35459	24.365	23.5966	24.6694	24.6067	24.5685	24.5671	22.4016	21.992	23.9738	22.2799	23.6893	23.7397	0.00571778	0.0152035	-1.38281
Perm1	Q149B8	24.5909	24.4504	24.4118	23.985	24.3516	24.3665	24.3469	24.2857	21.424	21.7989	21.6874	24.306	0.0454667	0.0875064	-1.38457
Cand1	Q6ZQ38	29.3787	29.1987	29.3386	29.2772	29.3997	29.3165	27.7678	27.8363	27.9825	27.9952	27.784	28.2311	6.5065e-09	3.10918e-07	-1.38541
Fdps	Q920E5	29.7487	29.5915	29.7197	29.4984	29.7032	29.6577	28.1767	28.1229	28.266	28.1056	28.237	28.6855	4.8448e-08	1.18291e-06	-1.38759
Akr1c13	Q8VC28	24.4842	25.0396	24.5888	25.1634	23.9408	25.4319	24.0489	24.3146	24.1279	22.1381	21.8018	23.8446	0.0196806	0.0430836	-1.39546
Sh3bgrl	Q9JJU8	28.6315	28.4168	28.5826	28.5122	28.4503	28.4919	27.0275	27.0663	27.0679	27.1805	27.1411	27.2251	3.09453e-11	1.2939e-08	-1.39614
Tmem176b	Q9R1Q6	24.0387	24.1325	24.3389	24.2697	24.4281	24.6752	23.1256	23.1668	23.2422	22.8089	21.5334	23.6256	0.00114887	0.00388572	-1.39678
Fkbp3	Q62446	28.9166	28.887	28.758	28.7616	28.7944	28.705	27.3233	27.4749	27.4428	27.2424	27.3359	27.6217	9.74455e-10	1.08148e-07	-1.39694
Ndufs3	Q9DCT2	26.9718	26.7998	26.8997	27.0796	26.9611	27.3387	25.0842	25.6916	25.8854	26.3384	25.6346	25.0121	7.47329e-05	0.000405814	-1.40071
Npepps	Q11011	28.1427	27.9463	28.2687	28.0777	27.9557	28.2663	26.9657	26.1819	26.8945	26.9184	26.51	26.7352	1.24261e-06	1.39481e-05	-1.40863
Mrps35	Q8BJZ4	25.1649	24.9778	24.6966	25.1877	25.0037	25.3825	22.7189	21.3378	23.7976	24.9458	25.2157	23.9213	0.0396703	0.0778282	-1.41269
Hpgds	Q9JHF7	25.2231	25.1567	25.6185	25.2232	25.4516	25.5147	23.8346	21.401	24.1314	24.8784	24.9298	24.504	0.0260023	0.0542931	-1.4181
Txn1	P10639	30.7964	30.6133	30.7591	30.644	30.8069	30.8221	29.1804	29.1523	29.2946	29.4922	29.1369	29.6661	3.6487e-08	9.99313e-07	-1.4199
Gm2a	Q60648	25.2367	24.5032	25.1834	24.4396	25.2653	25.4338	24.4631	23.1946	23.6571	24.4511	24.1377	21.5947	0.0136666	0.0315274	-1.42727
Gm20390	E9PZF0	32.6132	32.5618	32.5935	32.5198	32.5299	32.5565	30.9863	31.0233	31.1713	31.0249	30.9885	31.5662	2.74888e-08	8.20982e-07	-1.43568
Ldha	P06151	33.6036	33.7515	33.6199	33.7563	33.6941	33.6977	32.167	32.0476	32.3953	32.078	32.1425	32.661	5.18833e-08	1.25761e-06	-1.43862
Gm3837	P56812	27.2543	27.2429	27.3601	27.1185	27.0697	27.3869	25.5175	25.7805	26.0061	25.5924	25.5446	26.3544	1.55152e-06	1.63202e-05	-1.43947
Syap1	Q9D5V6	24.9714	24.4536	24.4628	25.1059	25.1512	24.851	23.7615	21.8899	23.7141	22.6817	24.0696	24.2397	0.00442328	0.012098	-1.43988
Fahd1	Q8R0F8	24.287	24.2005	24.3602	24.4492	24.0688	24.1572	23.4762	24.177	21.8729	22.4912	21.2423	23.6158	0.011305	0.0269338	-1.44125
Blmh	Q8R016	28.6606	28.4455	28.6029	28.5336	28.5519	28.5353	27.0984	26.7137	27.1857	27.154	26.8217	27.6534	9.89169e-07	1.16506e-05	-1.45048
Tbca	P48428	25.6659	25.6255	25.5065	25.7652	25.9446	25.7447	24.962	24.1872	24.5467	22.4247	24.6639	24.748	0.00366428	0.0103784	-1.45334
Lcp1	Q61233	33.0772	33.0444	33.0534	33.1007	33.1598	33.1778	31.5688	31.4797	31.7644	31.4652	31.526	32.0789	4.50031e-08	1.13184e-06	-1.45503
Rad23a	Q3TN85	24.9371	23.7702	23.7431	24.5947	24.5532	24.4357	23.4713	22.8405	23.1311	22.9607	21.665	23.2155	0.00116313	0.00392998	-1.45829
Park7	Q99LX0	29.9289	29.915	30.0305	30.0634	29.8343	29.9014	28.6569	28.3722	28.611	27.9324	28.3455	28.9994	2.1755e-06	2.17655e-05	-1.45935
Idh1	O88844	28.5504	28.5023	28.619	28.534	28.5295	28.5613	26.918	26.9846	27.0827	26.9409	27.069	27.5309	2.49673e-08	7.73291e-07	-1.46174
Adprhl2	Q8CG72-2	23.5398	23.8102	23.8106	23.9231	23.6605	23.8575	22.2374	21.7702	22.3092	22.4688	22.0831	22.957	6.99536e-06	5.65205e-05	-1.46263
Bin2	S4R1B8	26.3911	26.5339	26.5227	26.3518	25.9841	26.0381	25.9858	24.9917	25.4658	22.2115	24.8518	25.5207	0.025561	0.0534719	-1.46577
Usp8	A2AI52	24.2617	23.8435	23.9626	24.2478	24.3271	24.7231	23.9125	21.5058	22.0527	23.0365	23.279	22.7059	0.00276918	0.00816836	-1.47891
Aldoa	P05064	34.1917	34.1371	34.2107	34.0806	34.0613	34.1269	32.5424	32.5155	32.6671	32.5967	32.589	33.0069	3.42939e-09	2.20602e-07	-1.48176
Rnaseh2b	Q80ZV0	25.4744	25.1926	25.2286	24.9608	25.1184	25.2833	22.8682	21.8725	24.5268	24.3613	24.1941	24.5305	0.00861604	0.0215401	-1.48414
Pgd	Q9DCD0	31.5627	31.5521	31.5596	31.5766	31.5093	31.4909	29.973	29.9063	30.1046	29.8883	30.0201	30.4181	4.96927e-09	2.70892e-07	-1.49013
Cast	Q8CE80	22.1106	24.0042	24.6766	22.1493	24.0467	24.4548	22.9891	21.7353	21.5515	21.8011	21.6844	22.7345	0.0185386	0.040906	-1.49103
Thop1	Q8C1A5	28.1137	27.5602	27.5792	28.0069	27.5614	27.7174	25.1347	26.6112	26.2142	26.3667	26.3881	26.8502	0.000199138	0.00091878	-1.49562
Anxa3	O35639	29.5349	29.437	29.5123	29.4027	29.5705	29.4627	27.9886	27.9563	28.1896	27.842	27.711	28.2587	1.06238e-08	4.43643e-07	-1.49563
Lnpep	Q8C129	26.498	26.5058	27.3705	26.6686	27.2478	26.8671	25.0734	25.2052	25.0301	26.4228	24.4578	25.9395	0.000967049	0.00339037	-1.50483
Manba	Q8K2I4	24.7938	22.2638	24.8808	24.563	25.2059	24.6482	22.0029	23.9774	23.6859	21.8131	24.1904	21.6545	0.0430298	0.083392	-1.50522
Nit2	Q9JHW2	26.7013	26.7528	27.0925	26.8019	26.9126	26.903	25.9015	25.1754	25.5761	25.2006	24.6139	25.6412	1.52812e-05	0.000108526	-1.50925
Dera	Q91YP3	24.6758	24.7287	25.1039	24.994	24.5913	24.268	22.6491	21.6337	24.1325	23.9055	24.4601	22.461	0.00924363	0.0228698	-1.51996
Fyb	O35601	26.1298	25.6678	26.0546	25.4217	26.282	26.2964	25.0753	25.1094	24.405	24.615	21.8496	25.6185	0.0221993	0.04757	-1.52989
Glb1	P23780	27.0875	26.807	27.0106	27.2358	26.9998	27.2203	24.78	24.5633	25.5232	26.2204	26.037	26.0485	0.000416045	0.00169509	-1.53141
Inpp1	E0CYQ4	23.0861	23.3773	23.5427	23.6876	23.6691	23.8471	22.5708	22.2143	21.5771	21.7581	21.2517	22.6227	0.000120701	0.000595494	-1.53588
Lyz2	P08905	25.1595	25.0286	25.4336	25.0252	25.3419	25.2839	24.0402	23.5951	21.8032	24.7104	23.8342	24.0007	0.00350536	0.0100217	-1.54815
Cdkn2aip	Q8BI72	24.5393	24.6567	24.449	24.6669	25.2192	24.7331	22.2828	23.1118	23.9024	23.8102	21.7676	24.0817	0.00326482	0.0094389	-1.55125
Xab2	Q9DCD2	23.829	23.9945	23.7067	23.7415	22.1961	24.03	21.6592	21.7918	22.2636	22.5658	21.3788	22.5301	0.00118549	0.00399477	-1.55144
Was	P70315	25.2984	25.4181	25.5515	25.1908	24.7828	25.368	23.3069	22.1841	23.9155	24.0039	24.3202	24.5583	0.00177355	0.005602	-1.55344
Gm5814	J3QP80	22.7248	24.8515	21.9486	24.6838	24.8808	22.0786	22.6951	22.1193	21.4875	21.5999	21.4002	22.5293	0.0319705	0.0649705	-1.55611
Tmod1	P49813	23.6963	23.5504	23.5201	23.8531	22.932	23.6484	22.379	22.4897	22.2058	21.6663	21.609	21.4474	3.60256e-05	0.000222335	-1.5672
Hprt	P00493	29.1774	29.1393	29.2351	29.2843	29.21	29.1897	27.4704	27.3496	27.6462	27.5122	27.6179	28.2057	1.75536e-07	3.07417e-06	-1.57229
Tfg	Q9Z1A1	26.7848	26.548	26.9167	26.7272	26.8968	27.0966	24.6624	25.3394	25.5018	25.6984	24.6024	25.6781	2.50672e-05	0.000163769	-1.58126
Mapk1ip1l	Q8BH93	25.2905	24.8745	24.663	25.2568	24.6142	25.0731	22.736	24.0194	22.2634	22.5779	24.1068	24.555	0.00313185	0.0091414	-1.58561
Gltp	Q9JL62	26.0865	25.7166	25.968	25.5911	25.9066	25.9299	24.0608	24.2713	24.3848	24.2559	24.1126	24.5924	4.15226e-08	1.07669e-06	-1.58683
Glo1	Q9CPU0	26.9989	27.1779	27.2907	26.9757	27.125	27.2275	24.8411	25.9082	26.004	25.6678	25.2382	25.5867	6.21364e-06	5.13201e-05	-1.59164
Zbtb8os	B2KGA7	22.4461	24.877	25.1389	24.9983	22.6917	21.8965	22.6354	21.4623	22.5629	21.4465	22.1743	22.1717	0.0316952	0.0645286	-1.59922
Eno3	P21550	24.9115	25.3781	24.4658	24.4294	25.0756	24.645	24.4144	24.6862	21.832	24.6412	21.7023	22.0301	0.029545	0.0607639	-1.59985
Eif4e2	Q0P688	24.7752	22.4569	21.7778	24.3296	24.0876	24.3368	21.8463	22.3379	22.374	22.3853	21.7302	21.4502	0.0114612	0.0272285	-1.60668
S100a1	Q91V77	26.6615	26.3363	26.6951	26.5693	26.7624	26.8571	25.2666	24.9878	25.2949	25.0015	24.6614	25.0216	9.7062e-08	1.95568e-06	-1.60799
Rdx	P26043	27.9832	27.7105	27.8459	27.7589	27.844	27.7494	26.3445	26.167	26.246	25.7199	26.2212	26.5117	6.94092e-08	1.55257e-06	-1.61358
Ppp3r1	Q63810-2	24.7054	24.2835	24.483	24.3824	24.5231	24.3686	21.6041	21.8797	23.8291	22.1039	23.7874	23.8525	0.00476689	0.0128798	-1.61487
Taldo1	Q93092	30.763	30.7425	30.7857	30.6189	30.6984	30.679	29.058	29.0625	29.0571	29.0556	28.8504	29.4988	6.60875e-09	3.11356e-07	-1.61751
Pold2	O35654	25.1164	25.4663	24.9417	25.0641	25.0932	25.3232	22.2036	21.8193	24.6204	24.4532	23.9022	24.2256	0.00867427	0.0216533	-1.63008
Got1	P05201	30.4058	30.4059	30.4669	30.3953	30.3982	30.526	28.7402	28.6912	28.8258	28.744	28.5062	29.2735	2.90825e-08	8.60894e-07	-1.63619
Atp6ap1	Q3TKX1	24.442	24.671	24.792	24.5991	24.6354	24.6115	22.9123	23.6857	21.5052	23.7773	22.3631	23.6122	0.00127421	0.00422479	-1.64921
Mdh1	P14152	30.8542	30.7891	30.852	30.7299	30.8567	30.815	29.0614	29.1122	29.0705	29.1628	29.0157	29.4449	2.31251e-10	4.55021e-08	-1.67156
S100a11	P50543	25.0748	25.7403	24.6308	25.7973	25.3471	25.0337	24.0597	23.5783	23.7619	22.9328	23.2027	24.037	7.58623e-05	0.000411279	-1.67527
Apoa1bp	Q8K4Z3	26.805	27.2837	26.7722	26.8545	26.7087	26.2583	25.1472	25.856	24.8059	25.0098	24.9703	24.8257	1.09397e-05	8.17843e-05	-1.67792
Grb2	B1AT92	27.5586	27.3926	27.7089	27.7441	27.6574	27.6964	25.1919	26.0149	25.9027	26.2768	25.983	26.3182	2.23279e-06	2.22029e-05	-1.67842
Fv4	P11370	29.8588	29.6051	29.8037	29.7427	29.8792	29.8518	27.9218	28.1737	27.8985	28.3302	28.2226	28.0943	1.54244e-09	1.45606e-07	-1.68336
Romo1	P60603	24.7891	25.001	25.1888	24.6798	24.7595	24.5507	21.7262	24.3861	22.6414	24.3941	24.087	21.5596	0.0114335	0.0271821	-1.69577
Fabp4	P04117	27.4414	27.2199	27.4198	27.5254	27.4824	27.4854	25.4641	25.5745	25.66	26.0036	25.7694	25.9173	6.40891e-09	3.10918e-07	-1.69756
Atox1	O08997	28.7409	28.7328	28.7464	28.6394	28.5753	28.5767	26.7457	26.8905	26.6959	27.0513	26.8455	27.5385	1.28057e-07	2.36657e-06	-1.70732
Tmsb4x	P20065-2	30.8774	31.0587	30.8478	30.4312	30.239	30.5838	28.9324	28.8382	29.0719	28.6158	28.847	29.488	1.94194e-06	1.98043e-05	-1.70742
Edf1	Q9JMG1	26.9942	26.865	27.1179	26.9398	26.9357	26.9454	25.0485	25.0501	25.1709	25.4982	25.1273	25.6492	2.35072e-08	7.41808e-07	-1.70898
Card9	A2AIV8	23.3023	23.0759	24.3321	23.4981	24.1911	24.0687	21.8202	21.6378	22.3015	21.672	22.3708	22.386	5.75918e-05	0.00032656	-1.71332
Cuta	D5MCW4	24.1979	23.848	24.5015	24.331	24.2304	23.7314	22.9528	21.6687	21.663	22.5789	22.4796	23.1333	0.000112632	0.000567401	-1.7273
Asrgl1	Q8C0M9	21.8278	22.3445	24.5135	24.6728	24.7249	25.0152	22.9928	21.4725	22.0658	22.6788	21.498	21.9908	0.0187927	0.0414108	-1.73332
Pgm2	Q9D0F9	28.7144	28.6205	28.7674	29.0047	28.5385	28.7391	27.0461	26.9292	26.8053	26.7025	26.8843	27.6163	3.55166e-07	5.12082e-06	-1.73347
Nme1	P15532	28.7665	28.4753	28.5606	28.5374	28.7753	28.5302	26.7889	26.7634	27.0388	26.5647	26.6432	27.4238	2.0291e-07	3.40742e-06	-1.73706
Adi1	Q99JT9	26.823	26.7526	26.8552	26.8225	26.7199	26.4229	24.6412	25.0489	25.3363	25.3665	24.876	24.6674	2.88951e-07	4.39336e-06	-1.74329
Pycard	Q9EPB4	28.4706	28.527	28.7336	28.6086	28.874	28.5157	26.5832	26.8445	26.7197	27.1637	27.1283	26.8056	2.56802e-08	7.88076e-07	-1.74743
Rpia	P47968	24.1602	24.259	23.5369	23.8715	23.5487	23.7961	22.863	22.5906	21.8471	22.3999	21.4629	21.5117	7.01424e-05	0.000382751	-1.74954
Ppp5c	F7BX26	26.6626	26.6067	26.7226	26.9232	26.7066	26.5856	24.9014	24.6618	24.6879	25.1138	24.6577	25.6201	7.42061e-07	9.33155e-06	-1.76078
Txnip	Q8BG60-2	24.3077	24.1339	24.0417	21.7315	24.29	24.4421	21.8547	22.4126	21.5579	21.6294	22.4344	22.4714	0.00316096	0.00920226	-1.76439
Pitpna	J3QQ30	26.5114	26.5732	26.6901	26.4279	26.5178	26.8535	25.052	25.0513	24.5356	24.9559	24.6169	24.7532	1.94828e-08	6.51699e-07	-1.76817
Ccdc58	E9Q4B5	24.545	25.0813	25.0297	24.4841	24.8904	24.5891	21.6422	23.5517	23.3441	23.368	21.7915	24.2408	0.0022576	0.00687765	-1.78021
Fam49b	Q921M7	27.7789	27.6217	27.706	27.8798	27.7288	27.6173	25.5418	25.6327	26.0681	26.0914	25.7508	26.3858	1.26079e-07	2.35605e-06	-1.81032
Babam1	Q3UI43	24.6543	24.7105	24.818	24.8462	24.6778	24.56	23.6981	23.8007	24.0156	22.3892	21.9663	21.47	0.00215404	0.00662249	-1.82115
Psmb5	O55234	28.7958	28.9161	28.6639	28.616	28.5516	28.5916	26.6831	26.8007	26.8776	26.311	26.9607	27.5165	8.36316e-07	1.02472e-05	-1.83091
Actn1	A1BN54	27.6972	27.5912	27.4213	27.6402	27.5258	27.5885	26.1717	25.0507	25.8125	26.4256	25.2239	25.7836	8.21083e-06	6.46241e-05	-1.8327
Tecpr1	Q80VP0	25.9247	25.4029	25.3996	25.5717	25.7189	25.536	22.8322	24.4695	24.2996	22.7314	24.2562	23.8772	0.000203748	0.000933613	-1.84793
Lrp1	Q91ZX7	27.9421	27.3276	27.8462	27.2521	26.8535	27.6705	25.0971	25.8402	24.7811	25.8082	26.2877	25.9551	7.25546e-05	0.000394626	-1.85376
Naa20	Q9DB82	25.0781	24.2752	24.8575	24.8859	25.1374	25.1176	24.2145	21.5011	23.481	23.2063	22.0113	23.7491	0.00198027	0.00613333	-1.86472
Pdap1	Q3UHX2	27.5059	27.4162	27.5802	27.705	27.4386	27.5662	25.656	25.302	25.598	25.5181	25.5852	26.2585	8.71726e-08	1.82791e-06	-1.8824
Pi4ka	E9Q3L2	25.7481	25.1182	25.6241	25.5479	26.3666	25.6248	23.8839	24.1279	21.8205	23.5464	24.9449	24.2872	0.00213447	0.0065744	-1.90313
Dbi	P31786	28.9891	29.0556	28.9522	28.9483	28.8632	29.0397	26.8061	26.9779	27.2013	26.8624	26.9487	27.6269	3.65587e-08	9.99313e-07	-1.9041
Vcl	Q64727	27.0067	26.5374	27.1152	26.6144	27.0158	26.7936	23.883	25.1152	24.9299	25.1381	24.6102	25.8321	4.36806e-05	0.000260448	-1.92911
Tmsb10	Q6ZWY8	25.8074	26.2894	26.0974	26.4151	26.1049	26.1507	24.0781	23.8498	24.3305	23.855	24.3079	24.848	6.27077e-07	8.00601e-06	-1.93258
Sri	Q6P069-2	25.8717	25.7986	26.2519	25.9621	26.0335	26.1717	24.0648	24.8619	24.7732	24.0354	24.5953	22.0456	0.00114438	0.00387838	-1.95222
Impa1	Q80ZJ2	25.7609	25.7547	25.9499	25.2477	25.6362	25.9555	24.0322	24.3871	24.4008	22.9465	22.4668	24.3574	0.000298097	0.00127838	-1.95232
Stmn1	P54227	29.7253	29.719	29.7351	29.5239	29.5649	29.4419	27.5166	27.6041	27.7288	27.7396	27.2488	27.9765	7.25863e-09	3.2811e-07	-1.98262
Acsf2	Q8VCW8	27.0273	26.6333	26.7827	26.6223	26.8559	27.1966	25.0839	25.3994	23.8361	25.4385	24.0665	25.3973	8.02766e-05	0.000430329	-1.9827
Hnrnpd	G5E8G0	24.7888	24.7689	24.9041	25.1467	24.9608	25.4322	23.909	21.3324	22.5877	24.4712	21.2814	24.493	0.00919089	0.022773	-1.98781
Pgp	Q8CHP8	25.7973	25.716	25.6339	25.905	25.8693	25.5235	22.7379	22.6003	23.8252	23.9284	24.8428	24.4835	0.000326348	0.00138357	-2.00451
S100a6	P14069	28.4178	29.1236	28.0551	28.9832	28.3758	28.0296	27.5562	26.6019	27.4495	24.9959	26.0299	26.2234	0.000895755	0.00318324	-2.0214
Hn1l	Q6PGH2	26.1258	25.9657	25.9766	26.0035	25.9039	25.7973	24.7945	21.6086	24.799	24.8377	22.2874	25.2172	0.00940831	0.0231914	-2.03806
Ndufb5	D3Z568	23.9832	23.0971	23.9137	24.5483	24.7313	24.5154	22.4452	21.4093	22.464	22.9032	21.6964	21.6364	0.000149086	0.00071651	-2.03907
Timm8b	P62077	27.0439	26.8856	27.5417	26.9334	27.0807	27.2824	24.8574	25.3377	25.8832	24.3135	24.3151	25.6648	3.48886e-05	0.000216919	-2.066
Irf2bp2	E9Q1P8	25.8253	25.7077	25.6847	25.6554	25.2827	25.4083	22.7825	22.5109	25.7994	21.7313	24.159	24.0646	0.00606775	0.0159314	-2.08608
Dtd2	Q8BHA3-2	25.0701	24.6063	24.7675	24.5748	24.5898	24.2985	22.2298	22.3784	21.9456	22.9677	22.8873	22.903	1.16284e-06	1.32707e-05	-2.09922
Mrc1	Q61830	25.2702	25.0436	25.3332	25.1059	25.3006	25.2695	23.7527	22.6793	23.4716	22.7661	24.2648	21.7446	0.00020088	0.000924269	-2.10731
Rab3gap2	A0A0A6YWM5	26.7061	26.6109	26.6711	27.0429	27.0863	26.5218	22.7192	24.4434	24.7606	26.0512	25.3476	24.6485	0.00108549	0.00371645	-2.11144
Pepd	Q11136	27.0923	26.6804	27.2595	26.8887	26.963	26.9579	24.7669	24.9059	24.4817	24.6866	24.7944	25.4785	1.08104e-07	2.07821e-06	-2.12134
Ptma	P26350	31.975	31.8864	32.0394	31.9389	31.9212	31.8643	29.4969	29.7275	29.7968	29.8493	29.6286	30.3948	1.4662e-08	5.44937e-07	-2.1219
Gmppb	Q8BTZ7	24.309	26.0521	26.2506	26.2136	25.2555	24.549	24.3909	23.8188	24.0777	23.4026	22.0675	22.1267	0.0027607	0.00815051	-2.12425
Lsp1	P19973-2	27.6789	27.7658	27.9544	27.8642	27.6874	27.724	26.156	25.786	25.0832	24.7033	25.866	26.2762	8.65516e-06	6.73291e-05	-2.13398
Mpeg1	E9QN37	25.8183	25.9415	25.6717	26.5112	26.0348	25.5425	22.659	24.4342	24.4783	22.2969	24.4377	24.3943	0.000645346	0.00245684	-2.13662
Cd74	P04441-2	23.9059	23.2436	23.7544	24.3372	24.6878	24.4886	22.0523	21.9371	21.7812	21.7126	21.7842	22.2387	3.36097e-06	3.14914e-05	-2.15192
Arhgap25	Q8BYW1-2	28.0576	28.7956	28.7138	28.0131	28.593	28.6113	24.3765	25.4201	26.0789	27.2993	27.053	27.3205	0.00143296	0.00464462	-2.206
Gm10108	G3UWG1	29.4846	29.3301	29.4808	29.7103	29.6479	29.6376	26.6618	27.3653	27.3301	27.8373	27.0907	27.754	3.28477e-07	4.7772e-06	-2.20865
Man2b2	O54782	24.6417	25.271	25.445	24.938	25.4261	25.2216	21.7792	21.358	21.7628	24.2427	24.2349	24.2362	0.00406216	0.0112763	-2.22162
Rpe	B2KGF0	25.7328	25.3367	25.7096	25.5972	25.335	25.5205	23.7914	21.8934	21.7555	23.8746	24.3496	24.2273	0.000999972	0.00347997	-2.22337
Hmgn5	Q9JL35	26.3976	26.0614	26.5481	26.602	26.5089	26.4142	24.0462	23.6671	24.3548	24.3244	24.1813	24.4433	1.77282e-08	6.11348e-07	-2.25253
Ndufs4	E9QPX3	25.4477	26.0539	25.9826	25.7055	26.2453	25.4529	22.7723	25.2617	24.6088	25.0268	22.1354	21.5287	0.00710861	0.0182629	-2.25902
Memo1	Q91VH6	24.8698	25.1912	22.1553	24.8678	25.1561	25.0002	21.9989	22.5904	22.0649	22.3367	22.2517	22.4239	0.00093723	0.00329657	-2.26232
Tlr7	P58681	25.2827	25.2156	24.5979	25.5316	25.8488	25.4771	22.4803	21.8007	24.209	24.0542	21.5755	24.2341	0.00179963	0.00567904	-2.26663
Abcd2	Q61285	24.4193	24.1963	23.7425	24.3686	24.0793	24.33	21.6948	22.0733	22.6845	21.7009	21.5645	21.6075	5.0585e-07	6.76828e-06	-2.30174
Acot13	Q9CQR4	27.4792	27.3981	27.3706	26.9829	27.1472	26.6468	25.1154	24.2307	25.1047	24.8608	25.2194	24.5334	4.77714e-07	6.41863e-06	-2.32677
Ppp1r2	D3Z3A0	24.5474	24.5161	25.1546	24.2623	24.6067	22.1149	22.0122	21.8986	21.6736	21.5749	22.4094	21.6697	0.000431464	0.00175152	-2.32728
Nutf2	P61971	25.5208	26.2367	26.2464	26.4668	26.4099	26.3219	21.9259	24.4314	24.6475	25.0982	21.8538	25.1987	0.00478492	0.0129181	-2.34117
Pgm1	Q7TSV4	26.2432	26.305	26.2669	26.4548	26.8178	26.7098	24.1633	24.2008	23.8177	24.0466	23.7585	24.7361	1.00017e-07	1.96678e-06	-2.34574
Dhdh	Q9DBB8	24.7675	24.3173	24.4849	24.4352	24.842	24.7524	22.1501	22.391	22.4719	21.8089	21.8035	22.8698	2.23334e-07	3.66202e-06	-2.35064
Renbp	D6RHA2	26.1723	26.228	26.4536	26.3812	26.3878	26.3805	24.9027	24.9186	24.814	22.2879	21.5248	25.2226	0.00453077	0.0122915	-2.38879
Itga6	Q61739-2	26.1392	25.8684	25.5375	25.7995	25.7173	25.7853	22.7382	21.4937	24.9436	21.5941	24.3452	25.29	0.00594972	0.0156584	-2.4071
Hpse	D3Z3C3	25.148	24.2072	25.3086	24.5121	24.3235	25.1736	22.3152	21.6251	21.9035	22.6432	22.6341	23.1066	1.03912e-05	7.9177e-05	-2.40754
Ndufa6	Q9CQZ5	24.9977	26.1149	26.2903	22.3469	21.7351	25.9792	22.5888	22.1126	22.6701	22.1092	21.6242	21.6386	0.0158722	0.0357044	-2.45345
Plod1	Q9R0E2	26.1536	25.1553	25.848	25.9352	26.3372	26.0238	24.8175	22.6642	22.089	22.5566	24.3955	23.9342	0.000435954	0.0017676	-2.49936
LOC100042019	P62983	32.8748	32.188	32.8569	33.5988	33.589	33.4258	29.8321	30.6263	30.3901	31.9671	30.5665	30.1248	5.75996e-05	0.00032656	-2.50438
Fam21	Q6PGL7	26.3843	26.2544	25.3995	26.2287	26.657	26.4355	22.5658	24.8692	24.4248	21.7038	24.2552	24.4581	0.00098988	0.00345631	-2.51378
Acy1	Q99JW2	27.79	27.8497	27.6935	27.3267	27.6687	27.8941	24.1908	25.1608	25.5806	25.6453	24.5505	25.984	6.59139e-06	5.39076e-05	-2.51844
4931406C07Rik	Q91V76	24.5377	24.7058	24.2568	24.747	24.347	24.6792	22.2292	22.464	21.4377	22.2248	21.968	21.7475	4.57957e-08	1.13471e-06	-2.53371
Thumpd1	Q99J36	28.4754	28.4495	27.928	28.4934	27.7341	27.6745	24.7166	25.529	26.2895	26.0223	25.6021	25.2019	3.48433e-06	3.23752e-05	-2.56558
Myg1	Q9JK81	26.9616	27.1338	27.4884	27.2971	27.2114	26.8608	22.5435	24.0795	26.1909	26.16	22.1073	26.3275	0.00853519	0.0213699	-2.59073
Pdcd4	Q61823	24.1688	24.8627	24.8842	24.8966	24.9422	24.3955	21.7	22.0797	22.3592	22.6234	21.6239	22.1908	1.81361e-07	3.14734e-06	-2.59552
Aldoc	P05063	28.3519	28.4376	28.8137	28.4921	28.47	28.494	25.5829	25.9663	26.2476	26.1121	25.5768	25.9717	2.09175e-09	1.7722e-07	-2.60034
Stmn2	P55821	27.355	27.2396	27.2015	27.4398	27.1376	27.1822	25.0577	25.2927	25.1702	25.3378	21.7379	25.3469	0.00127614	0.00422642	-2.60207
Cox17	P56394	26.092	26.2286	26.0256	26.0687	25.9562	25.9329	24.4241	21.5	21.8486	24.7111	22.533	24.9377	0.00150844	0.00485168	-2.72489
Cmc1	Q9CPZ8	25.0965	25.052	24.78	25.0288	24.8657	24.7695	22.3268	22.2053	22.197	22.4293	21.5588	22.4857	5.02102e-09	2.70892e-07	-2.73159
Fads1	Q920L1	25.0109	24.6892	24.4079	24.8818	24.8842	25.0882	21.9942	22.1987	22.4918	21.8395	21.4921	22.5427	5.87783e-08	1.36537e-06	-2.73386
Ugp2	Q91ZJ5-2	27.2646	27.4419	27.4195	27.8195	27.3215	27.4956	22.9571	24.9106	24.1691	25.2413	24.8814	25.9461	6.68101e-05	0.000370447	-2.77617
Pold1	P52431	25.5586	26.1394	26.2574	26.0417	26.0342	26.8531	23.8429	23.5032	23.4981	23.4147	23.172	22.507	5.6207e-07	7.41809e-06	-2.82441
S100a13	A0A0A0MQ90	26.6698	25.8787	26.3988	26.3438	26.429	26.8329	22.2989	21.5843	23.9529	24.5713	24.4067	24.5097	0.000349743	0.00145148	-2.87157
Dpp3	Q99KK7	28.0632	27.7806	28.0277	27.3705	27.6633	27.7325	24.9271	24.8659	25.0772	24.5555	24.1866	25.656	1.68818e-07	2.97209e-06	-2.8949
Ubqln2	Q9QZM0	24.6448	25.1563	24.5463	25.3405	25.3102	25.7444	22.3907	22.5803	22.838	22.3518	21.4735	21.7253	1.25291e-06	1.39924e-05	-2.89716
Ptms	Q9D0J8	27.576	27.5599	27.6892	27.0928	27.032	27.0962	24.8052	25.0254	24.7843	24.9339	22.1214	24.6277	9.22996e-05	0.000480907	-2.958
Eif4ebp1	Q60876	25.1738	25.3239	24.6817	24.9745	25.0821	25.1008	22.4621	22.0431	21.8397	22.6346	21.3423	21.4747	9.83362e-08	1.95568e-06	-3.09002
Nqo2	Q9JI75	25.3968	25.4335	25.0927	25.695	25.6238	25.3056	22.0086	22.2673	22.5265	22.6927	21.9406	22.5512	2.11923e-09	1.7722e-07	-3.09343
Ddt	O35215	26.5761	26.572	26.6036	26.474	26.4953	26.5579	22.3405	22.6885	23.9546	23.8294	22.336	25.168	4.47263e-05	0.000264553	-3.16032
Acadvl	P50544	26.811	26.7503	26.6822	27.5584	26.986	26.8934	21.9042	22.8273	24.1543	23.978	23.3918	26.2246	0.000384173	0.00157483	-3.20022
Sord	Q64442	26.7251	27.1136	27.6809	26.5932	28.088	26.5726	24.4349	22.1894	24.2182	22.3301	25.8859	24.4596	0.00048447	0.00194078	-3.2092
Apeh	Q8R146-2	26.5799	26.866	26.1663	26.1696	26.3155	26.5135	21.8009	22.5561	22.8789	23.6375	23.7022	24.3419	7.65319e-06	6.12135e-05	-3.2822
Mt1	P02802	26.6251	26.51	26.6473	26.7416	26.5688	26.76	23.8427	23.0719	23.4256	23.4418	22.8222	23.4515	8.12915e-10	1.00711e-07	-3.29953
Itpr1	P11881-8	25.8291	25.762	25.8325	25.8098	21.8056	25.9323	22.2613	21.5608	21.683	21.7307	22.4991	21.423	0.000767157	0.00280453	-3.30222
Hpgd	Q8VCC1	25.0088	25.1605	25.6036	25.6463	25.3681	25.4606	22.8841	22.6114	22.6524	21.4765	21.4126	21.3693	8.77599e-07	1.05596e-05	-3.30696
Fth1	P09528	28.3483	27.8476	28.4427	28.2019	28.3237	28.5452	24.9316	25.1065	24.3617	24.2223	25.0117	25.7587	8.46135e-08	1.79134e-06	-3.38617
Selenbp1	P17563	25.9356	25.7926	26.1458	25.5999	25.8346	25.8871	21.6582	22.6438	22.0728	22.703	22.3043	21.8271	2.89009e-09	2.08207e-07	-3.66439
Cab39	Q06138	27.351	27.3264	27.7125	27.7771	27.7462	27.7213	23.5886	24.5266	23.597	24.6417	21.3801	24.5658	1.92622e-05	0.000131262	-3.88911
Gnpda1	O88958	26.4755	26.1715	26.0998	26.2382	26.4529	26.2617	22.3344	22.5676	21.6871	22.4662	22.202	21.2956	2.41512e-09	1.83604e-07	-4.19114
LOC100862446	Q9CPX4	28.4741	28.1034	28.4711	28.1273	28.2404	28.0479	23.3215	24.615	23.8259	24.4905	21.9929	25.4977	6.56751e-06	5.3844e-05	-4.28677
Cd93	O89103	26.4462	26.7899	26.6946	26.4093	26.8045	26.6274	22.1113	21.6119	21.5131	21.6401	21.7679	22.343	2.06985e-11	1.15394e-08	-4.79743
Ahnak2	E9PYB0	27.5187	27.7762	28.1908	27.2588	27.4301	28.0285	22.7121	23.0322	22.8498	23.6006	21.9653	23.1983	6.32309e-09	3.10918e-07	-4.80749
Sod1	P08228	27.5951	27.6884	27.7893	27.536	28.1663	27.6564	23.085	23.4483	21.5894	23.2893	22.2906	23.3019	2.40512e-08	7.51881e-07	-4.90451
Dhps	Q3TXU5	22.1414	22.9114	22.6344	22.3352	23.2247	22.5661	22.6124	21.9867	22.3772	20.8471	22.0343	22.0188	0.0502367	0.0948852	-0.65613
Rbbp6	P97868-2	22.6041	23.7388	23.1249	21.8165	23.4672	24.3228	23.8664	24.152	23.6745	24.0601	24.1986	24.0395	0.0506606	0.0955882	0.819447
Xdh	Q00519	25.7492	25.7548	25.1207	25.8268	26.0272	25.5764	25.4749	24.8613	25.872	25.1126	25.0418	25.0776	0.050666	0.0955882	-0.435817
D2Wsu81e	Q3UHX9-2	25.6109	24.8386	25.6481	25.4118	25.6131	25.7637	25.9036	25.8358	25.6704	25.7469	25.8554	25.7504	0.0508932	0.0959627	0.312723
Tars2	Q3UQ84	25.1514	25.2342	25.3468	25.4631	25.1931	25.0261	25.1284	24.7723	25.1421	23.8966	24.903	24.9299	0.0511352	0.0963646	-0.44039
Zfp330	Q922H9-2	24.5588	22.1867	24.2684	22.6804	24.7087	24.3096	24.9132	24.6324	24.8877	24.8259	24.846	24.4868	0.0512304	0.0964897	0.9799
Ddx52	Q8K301	25.9594	21.8815	25.3868	24.9157	25.5595	25.7617	26.1868	26.5635	26.4243	26.4213	26.0563	26.154	0.0513103	0.0965857	1.39024
Wasf2	Q8BH43	27.0399	27.0081	27.0013	26.6223	26.9328	26.7858	26.7403	26.8274	26.6029	26.7445	26.6978	26.796	0.0513476	0.0966016	-0.163562
Uba52	P62984	23.0639	23.7392	24.3083	23.107	22.0278	23.6622	23.6781	24.1177	23.8596	24.0381	24.171	24.6123	0.0514142	0.0966726	0.761367
Gpatch4	A0A0A6YWB3	22.1693	22.4156	22.0335	21.724	21.6531	21.8647	22.4422	22.0846	22.234	22.8315	22.0335	22.4716	0.0514892	0.0967592	0.372844
Mapkapk2	P49138	25.0918	24.9163	25.3577	24.0537	24.506	25.2988	26.1219	25.0232	25.1157	25.6681	25.4859	25.3061	0.0515827	0.0968806	0.582773
Vamp3	P63024	25.4785	25.4579	25.9523	25.9576	25.9771	26.0827	25.3404	25.8423	25.3971	25.4954	25.535	25.5355	0.051797	0.0972284	-0.293399
Safb	S4R1M2	27.0217	27.2807	27.3717	27.1275	27.2131	27.3794	26.7044	27.1565	27.121	26.901	27.1943	27.0542	0.0520272	0.0976057	-0.210415
Mob1a	Q921Y0-2	24.9187	25.5477	25.2092	24.9323	25.2475	24.8492	24.7063	24.5344	24.6598	22.286	24.3984	24.7586	0.0524117	0.098272	-0.89353
Stt3a	P46978	27.9872	28.0143	28.2099	28.0571	28.3024	28.1048	27.8162	28.0741	27.7914	28.1157	27.9759	27.9367	0.0525419	0.0984608	-0.16097
Chmp2b	Q8BJF9	23.3545	23.9727	23.6722	24.0666	23.8048	23.5337	23.3385	23.3066	23.5182	23.7834	23.2767	23.4139	0.0528658	0.0990124	-0.294538
Pofut2	Q8VHI3	21.6954	21.8521	22.263	21.5599	22.1654	22.5269	22.5188	22.0419	22.296	22.4435	22.6819	22.3818	0.0529545	0.099123	0.38352
Stxbp2	F8WGM5	26.9476	26.8736	26.979	26.7857	26.9669	26.9261	26.6364	26.8775	26.9282	26.7977	26.4619	26.7771	0.0530122	0.0991756	-0.166693
Luc7l	Q9CYI4	24.2621	21.8828	25.79	25.6284	25.1563	25.0769	25.9641	26.0812	25.7564	25.6989	26.0331	26.0984	0.0531461	0.0993704	1.30596
Hnrnpk	P61979-2	32.3946	32.3491	32.4627	32.3221	32.3843	32.405	32.4071	32.4441	32.3811	32.4529	32.5568	32.5147	0.0533206	0.099641	0.0731435
Uhrf1	Q8VDF2-2	24.7729	25.2192	23.515	24.7036	24.0445	21.8922	22.3745	23.0701	23.6834	22.9688	22.904	21.9285	0.0536991	0.100292	-1.203
Pef1	Q8BFY6	23.5132	23.6471	23.3766	23.417	23.6837	23.6827	22.5631	21.4774	23.6748	23.2945	22.9191	23.2007	0.0537946	0.100415	-0.698459
Sart3	Q9JLI8	25.7026	25.456	25.8891	25.7542	25.5721	25.8374	25.8369	25.7698	25.8511	26.0755	25.8617	25.8523	0.0538385	0.100441	0.172657
Mogs	Q80UM7	27.2036	27.1768	27.4772	27.4277	27.3803	27.4966	27.5017	27.4288	27.4458	27.6412	27.4581	27.5354	0.054227	0.101088	0.141471
Polr2h	Q923G2	25.7287	25.8267	25.9895	25.7833	25.874	25.7623	26.0343	26.0084	26.0447	26.1506	25.8365	25.7843	0.0542461	0.101088	0.149041
Ctsz	Q9WUU7	30.6077	30.8424	30.527	30.4051	30.4438	30.3261	30.4242	30.435	30.3693	30.1858	30.3203	30.3272	0.0546817	0.101801	-0.181719
Pgls	Q9CQ60	29.1395	28.8545	28.7737	28.89	29.0959	29.0462	29.0259	28.6844	28.7299	28.7367	28.83	28.7722	0.0546893	0.101801	-0.170132
Kti12	Q9D1R2	24.2582	24.3643	24.4378	22.5706	24.2966	24.539	24.6218	24.8023	24.8675	24.7794	24.6266	24.7726	0.0547764	0.101906	0.66729
Rtn4	Q99P72	28.8853	28.8703	28.9772	28.8799	28.9609	28.9508	28.934	29.0228	28.9976	29.2574	29.0265	28.9546	0.0548512	0.101988	0.111422
Plod3	Q9R0E1	24.518	22.6314	24.7797	24.8322	24.5973	24.3502	25.0634	24.6588	24.8982	25.2869	25.1164	25.2778	0.054922	0.102063	0.765423
Pfkp	Q9WUA3	30.1931	30.2038	30.2054	30.1734	30.2587	30.16	30.0007	30.0411	30.0721	30.2931	30.1166	30.1007	0.0549561	0.10207	-0.0950009
Nln	Q91YP2	26.6491	26.3453	26.7394	26.6935	26.3335	26.5454	26.4195	26.0568	26.1618	26.7605	26.1243	25.9058	0.0550222	0.102136	-0.312935
Mndal	D0QMC3	25.0741	22.6236	25.8363	22.4662	25.5662	25.6028	26.0064	26.0115	25.7107	26.2321	25.6635	25.8918	0.0552922	0.10258	1.39113
Trim25	Q5SU71	27.4128	27.4101	27.3241	27.5313	27.5282	27.4444	27.4373	27.3359	27.2936	27.3758	27.3969	27.2852	0.0554729	0.102859	-0.0876793
Plaur	P35456-2	21.4517	21.9629	21.6903	22.2274	22.6239	22.141	23.1984	23.8425	23.6138	21.7495	23.1821	21.796	0.0556395	0.10311	0.880851
Arfgef2	A2A5R2	25.4647	25.3889	25.1333	25.5989	25.3425	25.3513	25.3208	25.389	25.0279	25.2263	24.913	25.1516	0.0558014	0.103353	-0.208513
Eftud1	Q8C0D5	25.6334	25.6437	25.3985	26.0401	25.9218	25.9388	25.06	25.3265	25.6719	25.784	25.5545	25.2063	0.0558726	0.103428	-0.328854
Txndc9	A0A0A6YWP9	21.7546	23.8164	23.7549	23.3302	23.4977	23.8112	24.2511	24.1071	24.3765	23.3955	24.0682	24.416	0.0559515	0.103516	0.774914
Elavl1	P70372	29.4054	29.385	29.4723	29.397	29.3634	29.4061	29.2228	29.6479	29.5519	29.8283	29.7216	29.5688	0.0561275	0.103785	0.185334
Eif5a	P63242	31.3306	31.5455	31.5672	31.744	31.5585	31.6628	31.8179	31.7093	31.857	31.534	31.818	31.6557	0.0562068	0.103874	0.163894
Mars2	Q499X9	22.1824	21.6512	22.1844	22.1704	22.5477	22.3089	22.501	22.7576	22.6811	22.2984	22.3468	22.3214	0.0571698	0.105595	0.310183
Nemf	Q8CCP0-3	23.9509	24.2624	24.3953	24.3028	24.1108	23.9336	24.5796	24.4023	24.59	24.6834	24.5157	23.9308	0.0572813	0.105743	0.290985
Commd4	Q9CQ02	25.3905	25.7737	25.8229	25.6296	25.5459	25.6045	25.409	25.4608	25.1702	25.6942	25.5052	25.0743	0.0573927	0.10589	-0.242231
Ndufs7	Q9DC70	25.0717	25.6555	25.5494	26.2857	25.6597	24.9182	25.3424	25.0937	24.7408	23.5392	25.2742	24.8253	0.0575393	0.106102	-0.720773
Tomm40	Q9QYA2	27.9814	27.9448	27.9537	28.0779	28.1213	28.0359	28.0208	28.177	28.0147	28.1131	28.2124	28.1454	0.0576886	0.106273	0.0947415
Rps26	P62855	30.3249	30.1804	30.4684	30.1597	30.4205	30.3132	30.2831	30.4126	30.4356	30.4562	30.6081	30.5586	0.0577044	0.106273	0.147853
Hist1h2ah	Q8CGP6	23.4696	24.8181	23.3809	24.67	22.3545	22.338	24.9263	24.7796	24.6194	23.3896	24.8296	24.9388	0.0577274	0.106273	1.07537
Rnaseh2c	F6ZDT4	22.2947	21.9055	23.5596	23.4588	23.3754	23.4196	22.7432	21.7994	22.7868	22.099	22.4613	21.4304	0.0579212	0.106571	-0.782249
Arl1	P61211	26.5003	26.7653	26.3552	26.8881	26.9051	26.7052	26.2106	26.5379	26.3473	26.6986	26.4596	26.4251	0.0580289	0.106666	-0.240015
Magohb	A0A023T778	27.5174	27.1228	27.1398	27.2922	27.3627	26.7909	27.5527	27.7892	27.2735	27.6148	27.3399	27.3369	0.0580363	0.106666	0.280187
Denr	E9Q0G1	26.6281	26.4626	26.6902	26.4272	26.2463	26.5213	26.0966	26.2377	26.4951	26.1729	26.4053	26.4071	0.0583688	0.107218	-0.193481
Cdc37	Q61081	28.9835	29.2265	29.2378	29.0775	29.0292	29.2259	29.2999	29.2049	29.1678	29.1422	29.496	29.4895	0.0585925	0.107539	0.169968
Vps16	G3X8X7	25.0492	24.8501	24.7541	24.6843	25.073	24.7955	25.0713	24.5818	24.5466	24.4024	24.6174	24.5159	0.0586077	0.107539	-0.245122
Nt5dc2	Q91X76	23.5229	23.6728	24.015	23.9271	23.1914	24.0607	23.4493	23.5458	22.8778	23.3558	23.7129	23.0453	0.0588946	0.107953	-0.400505
Nosip	Q9D6T0	24.5678	22.6182	21.6126	22.707	24.0611	21.8722	21.6878	21.6575	21.8484	21.8741	22.446	21.5427	0.0588981	0.107953	-1.06373
Cd28	P31041	24.305	24.7515	24.8725	22.866	23.4532	23.613	23.4963	23.0402	23.5924	21.4706	21.5563	23.8279	0.0589957	0.108073	-1.14625
Rap1gds1	Q3TU36	27.357	27.256	27.0751	27.2562	27.4256	27.3186	27.2362	27.0237	27.3614	27.0019	27.0737	26.9795	0.0590469	0.108107	-0.168724
Slc25a13	Q9QXX4	28.4206	28.3208	28.4726	28.3738	28.8163	28.5763	28.2266	28.3699	28.2375	28.4907	28.294	28.2953	0.0592274	0.108293	-0.177735
Ndufa7	Q9Z1P6	25.1285	25.405	25.5029	24.8971	25.6012	24.753	23.6339	24.4448	22.5019	24.7801	24.7451	25.4541	0.0592409	0.108293	-0.954647
Dek	Q7TNV0	27.9012	27.9889	27.9702	27.9202	27.9588	27.9101	27.8415	27.8693	27.7444	28.0264	27.8427	27.7894	0.0592455	0.108293	-0.0893027
Tars	Q9D0R2	28.6346	28.573	28.5977	28.568	28.7509	28.5907	28.563	28.4959	28.5915	28.5068	28.5839	28.5598	0.0593212	0.108372	-0.0689913
Bag2	Q91YN9	26.2272	25.8907	26.114	26.0392	26.1221	26.3211	26.2245	26.1953	26.3362	26.2895	26.2831	26.2123	0.0594368	0.108524	0.137745
Metap2	Q3TMN1	26.7516	26.3375	26.2503	26.6454	25.7974	26.4449	27.0918	27.0199	26.5236	26.4273	26.5748	26.8707	0.0595701	0.108687	0.380165
Ap3s1	Q9DCR2	25.3238	24.9969	25.3984	25.0093	25.4704	24.8564	25.481	25.488	25.3889	25.9519	25.3917	25.2061	0.0595913	0.108687	0.308737
Tut1	Q8R3F9	22.2645	22.7207	22.3899	21.5192	22.5463	22.178	21.5888	20.2294	21.5801	21.8991	22.2482	21.8436	0.0596946	0.108817	-0.704911
Clta	B1AWE0	27.9028	27.997	27.9163	28.0936	27.6014	27.9254	27.5549	27.9134	27.5433	27.8926	27.6114	27.7073	0.0599139	0.109157	-0.202266
Vps29	D3YYD5	28.1032	27.9549	28.1876	27.9978	27.945	28.153	27.8207	27.9357	27.8709	28.0948	28.0139	27.7902	0.0603242	0.109844	-0.13588
Cd3eap	Q76KJ5	22.7	24.4525	21.6251	22.2839	24.6904	24.3104	23.8894	24.8673	24.4731	24.9333	24.5736	24.3534	0.0604014	0.109869	1.17133
Eef1d	Q80T06	30.506	30.4913	30.6115	30.5113	30.4275	30.5265	30.5365	30.5121	30.5698	30.7379	30.5964	30.6489	0.0604112	0.170492	0.107999
Pmf1	A0A0A6YVR2	22.257	21.7718	22.263	21.8739	22.2665	22.2796	21.5427	21.5365	22.1807	22.1934	21.4498	21.697	0.0604361	0.109869	-0.351924
Myh9	Q8VDD5	32.2023	32.1323	32.1534	32.1504	32.1666	32.1729	32.2091	32.197	32.1731	32.3009	32.2268	32.1592	0.0607315	0.110346	0.0480227
Gpsm3	Q3U1Z5-2	24.415	24.5215	23.6437	24.4729	24.9153	24.4805	24.4025	24.1452	23.8305	22.4165	23.8291	23.6619	0.0607968	0.110405	-0.693866
Vps45	P97390	24.0669	23.8308	24.3598	24.3502	24.1189	24.1877	23.7214	24.2319	23.7929	22.8231	23.8805	23.8235	0.0608346	0.110413	-0.440183
Atp5l	Q9CPQ8	27.7038	27.5699	27.6187	27.512	27.6694	27.7998	27.5171	27.5598	27.5827	27.4527	27.6292	27.5171	0.0611177	0.110851	-0.10248
Sap30	O88574	24.4821	22.7062	24.4824	24.5512	24.4262	24.1063	24.7434	25.0033	24.5687	24.7028	24.9245	24.6025	0.0611421	0.110851	0.631784
Csnk2b	P67871	27.0628	27.4374	27.6147	27.7277	27.4507	27.7839	27.8285	27.5866	27.6101	27.9697	27.7684	27.8683	0.0615265	0.111488	0.259057
Mcm3	P25206	28.7158	28.6766	28.6925	28.7584	28.7515	28.7627	28.7508	28.6288	28.5922	28.7009	28.6705	28.6729	0.0616807	0.111707	-0.0568983
U2af2	P26369	29.1164	28.8835	29.0051	28.912	28.9687	29.087	28.7346	28.77	28.6136	29.1454	28.8441	28.8295	0.0618671	0.111983	-0.172574
Chuk	E9Q605	20.7876	20.8509	20.7587	20.677	21.2928	21.1203	21.8762	21.3142	21.2575	20.6269	22.5637	21.4283	0.0619906	0.112146	0.596586
Gphn	A0JNY3	25.9195	25.7933	25.7504	26.0836	26.1741	25.8124	25.8881	25.5178	25.8953	25.592	25.6883	25.7634	0.0620369	0.112169	-0.198065
Specc1	Q5SXY1-2	24.7018	24.834	24.7766	25.4814	24.5268	25.1771	22.4049	21.8252	24.6639	24.4052	24.5	24.7901	0.0622536	0.1125	-1.1514
Mrpl45	Q9D0Q7	25.5277	25.0119	25.8319	25.2465	25.7631	25.2753	24.2372	24.5467	24.0535	25.3662	25.7263	24.9819	0.0625553	0.112985	-0.624101
Gak	Q99KY4-2	24.0419	24.2507	23.2999	24.6777	23.3439	23.1556	24.1426	22.0881	23.9672	21.3462	22.5599	22.1058	0.0626167	0.113034	-1.09332
Trim5	D3YYU4	20.9418	22.6325	20.5054	20.3137	21.2437	21.0107	22.2104	21.6406	22.433	21.8166	21.5104	21.6375	0.0633306	0.114261	0.766764
Smek2	Q922R5-2	22.6746	22.6618	22.6271	22.6134	22.802	22.8491	22.7394	22.8805	22.5906	23.0768	22.9919	23.0273	0.0640442	0.115487	0.179753
Atpif1	E9PV44	28.5661	27.913	28.1497	27.9515	27.5053	27.1036	27.4025	27.4855	27.2115	27.2773	27.4393	27.661	0.064298	0.115882	-0.452032
Ap3d1	O54774	26.1776	25.7406	25.7932	25.7848	25.8955	25.6766	26.3804	25.881	26.0992	26.2318	25.862	25.993	0.0643594	0.115905	0.22986
Hip1	Q8VD75	25.6009	26.0911	25.0465	25.7019	25.8339	25.9235	25.4988	25.2216	25.1943	24.4561	25.535	25.5049	0.0643801	0.115905	-0.464534
Ctsl	P06797	25.7198	25.7618	25.9122	25.7724	25.7467	25.9228	22.8189	25.2336	25.701	24.8256	25.2279	25.592	0.0646256	0.116236	-0.906113
Diexf	Q8BTT6	24.4526	24.2445	21.2975	24.8414	25.481	25.6491	25.6085	25.8308	26.3312	25.7482	25.4338	25.2811	0.0646336	0.116236	1.37792
Copb2	O55029	29.2467	29.2054	29.2491	29.091	29.2426	29.1969	29.2173	29.3655	29.2762	29.6476	29.4125	29.2058	0.0648896	0.116634	0.148866
Eif4a2	P10630	25.8649	26.6862	25.7692	26.1281	25.4768	24.9652	27.4865	26.6367	27.6522	26.3121	25.7025	26.0574	0.064961	0.1167	0.826157
Exosc3	Q7TQK4	24.4559	24.5967	24.6421	24.5669	24.3209	24.5644	23.772	24.6353	22.2224	25.168	22.4615	21.5969	0.0651816	0.117033	-1.21512
Knop1	E9QKQ3	22.1719	24.9819	24.7399	24.4256	24.658	24.1771	24.865	25.1438	25.2571	24.9416	25.4084	24.8711	0.0652556	0.117062	0.888775
Mpdu1	E9PVP3	23.5867	23.3852	23.7531	24.2988	24.0285	24.3733	22.523	23.6924	23.4196	24.0396	23.2999	23.1623	0.0652679	0.117062	-0.548134
1110008L16Rik	V9GXP4	20.7236	21.2945	21.036	21.2045	20.507	22.671	22.431	20.9238	22.2112	22.6094	22.4545	21.8076	0.0654081	0.117251	0.833495
Tpr	F6ZDS4	21.5	22.4425	22.2419	22.0861	22.7904	21.8454	22.4187	22.5904	22.7149	22.6651	22.634	22.3076	0.0658256	0.117882	0.404034
Commd9	Q8K2Q0	25.4111	25.0172	25.1836	25.2929	25.4961	25.5284	24.9799	25.1977	25.079	25.3296	25.1726	24.7817	0.0658304	0.117882	-0.231463
Fndc3a	F6TLV3	24.511	24.3058	24.6182	24.1472	22.7267	25.4173	24.8362	24.9799	25.0266	25.0753	25.2553	25.0672	0.0659169	0.117973	0.752377
Rbmx	Q9WV02	23.2914	23.3399	22.4293	23.8418	23.8873	21.8472	23.5024	23.7425	24.1638	23.9988	23.7991	23.6927	0.0660472	0.118143	0.710396
Atl2	Q6PA06	23.6095	23.0866	23.6827	23.9117	23.8616	23.781	23.5812	23.7076	23.4423	22.7158	23.0199	22.2827	0.0661558	0.118274	-0.53062
Mrpl40	D3Z7C0	24.572	24.4292	24.8469	24.5491	24.5859	24.5531	24.2594	24.2855	24.6169	24.5768	24.204	24.4697	0.0671236	0.11994	-0.187323
Vrk2	Q8BN21-2	24.1893	24.1239	24.2815	24.1768	24.2001	24.4803	22.1287	22.1487	23.6866	24.2257	24.2105	24.006	0.0675721	0.120677	-0.840966
Pgrmc2	Q80UU9	22.3359	22.2126	22.2016	21.8983	21.7107	22.5197	24.0289	24.0332	22.3361	22.2255	22.5658	22.3044	0.0676987	0.120839	0.769204
Nmt1	O70310	26.5621	26.8834	26.6352	26.8721	26.9192	26.7925	27.1441	26.7383	27.2068	26.7285	27.042	27.0715	0.0678312	0.120987	0.211089
Phb	P67778	31.4185	31.3427	31.4607	31.3119	31.4323	31.4218	31.4235	31.4827	31.3883	31.5917	31.5067	31.4537	0.0678538	0.120987	0.076471
Usp48	A2ALR8	25.2813	25.3632	25.1716	24.794	24.4209	24.7112	24.6874	24.7824	24.6041	24.4586	24.7302	24.518	0.0685322	0.122095	-0.326927
Cul4a	Q3TCH7	23.6651	23.197	23.8682	22.8822	23.1501	23.4169	22.7793	23.0753	22.9288	23.0581	23.1149	23.2452	0.0685483	0.122095	-0.329661
Mrps15	Q9DC71	25.8217	25.6014	25.474	25.3087	25.2628	25.4397	26.298	25.4955	26.0041	25.7016	25.5517	25.6867	0.0695777	0.123862	0.304883
Nek6	A2ATN9	23.9016	23.051	23.0493	23.5811	23.3358	23.6319	22.4961	23.3853	22.6192	21.4678	23.3735	23.1797	0.0699206	0.124407	-0.671489
Myef2	A2ATP5	27.5368	27.5436	27.7466	27.2364	27.6205	27.8984	27.7167	27.7114	27.834	28.0629	27.6909	27.8869	0.0699586	0.124408	0.220084
Ina	P46660	24.02	21.9378	24.1553	24.6151	23.6282	23.4656	24.248	24.5742	24.1286	24.2914	24.656	24.6592	0.0703678	0.125069	0.789227
Pbdc1	Q9D0B6	27.3546	27.3399	27.2329	27.1097	27.0557	27.3974	27.0966	26.8707	27.2106	27.2002	27.158	26.9963	0.0705402	0.125309	-0.159654
Ankfy1	Q810B6	27.6049	27.6676	27.6724	27.6887	27.4484	27.5843	27.4371	27.6063	27.448	27.5563	27.592	27.4128	0.0710092	0.126075	-0.102285
Tnpo3	Q6P2B1	26.1451	25.7802	25.9782	25.9541	26.1205	26.0286	26.1966	26.1141	25.9523	26.2204	26.1861	26.1495	0.071162	0.12628	0.135374
Arhgap12	S4R2V0	21.6237	22.6791	21.6084	21.4869	22.1872	22.363	21.6253	23.5656	22.5318	23.6927	22.7357	22.3378	0.0713016	0.12646	0.756797
Uba6	D3Z061	27.0327	27.1429	27.2866	26.8259	27.3014	27.1781	27.4702	27.2153	27.3648	27.1161	27.3636	27.3113	0.0713856	0.126542	0.178978
Ilkap	Q8R0F6	23.7779	24.0062	23.2131	23.4394	23.2267	23.1266	25.2671	24.0755	25.0584	22.9473	23.7896	24.1806	0.0728302	0.129034	0.754762
Vps25	Q9CQ80	22.3575	22.5814	21.3283	23.7098	22.777	22.8745	23.9109	22.6726	24.173	23.1572	23.1837	23.2054	0.0731907	0.129604	0.779019
Bcap29	Q61334	26.0628	25.6735	25.4921	25.3679	25.5819	25.6618	26.1462	26.0749	25.9761	25.5055	25.7801	25.9845	0.0736791	0.130361	0.271237
Ccdc93	E9QAD4	21.9435	24.8226	22.1675	24.6946	25.0211	25.1279	25.2081	25.0703	24.9551	25.2073	25.3738	25.2734	0.0736958	0.130361	1.21848
Cpne1	Q8C166	26.8867	26.8377	26.6637	26.9273	26.7322	26.772	27.3716	26.9572	27.4593	26.6186	27.0411	26.9529	0.0737832	0.130446	0.263515
Ttc1	Q91Z38	25.3588	25.4268	25.2666	25.3937	25.2062	25.1365	22.7765	25.2945	25.4247	21.8367	21.6827	25.6084	0.0740116	0.130781	-1.5275
Mipep	A6H611	25.6906	25.7138	25.5863	25.4347	25.7347	25.8702	25.3783	25.6665	25.3326	25.5564	25.6198	25.5099	0.0744763	0.131533	-0.161132
Cmpk1	Q9DBP5	29.1023	28.9205	28.9733	28.9516	28.9647	28.8284	29.0907	28.9663	29.0325	29.2106	29.1101	28.9623	0.07544	0.133164	0.1053
Sypl	D6RFU9	22.2302	22.5988	22.1008	22.2344	23.6986	23.3147	22.2938	21.8221	22.5527	21.5151	22.512	21.5247	0.0755648	0.133315	-0.659512
Pddc1	Q8BFQ8	25.4295	24.7839	25.2578	25.1126	24.9157	25.0015	23.6096	24.459	24.8604	25.1803	21.9053	24.5904	0.0768488	0.1355	-0.98268
Slc25a3	Q8VEM8	30.1486	30.0893	30.1616	30.4312	30.5504	30.268	29.9524	30.2684	30.0849	30.1257	30.0927	30.1235	0.0768844	0.1355	-0.166907
Cope	O89079	27.667	27.7234	27.682	27.6344	27.5973	27.8158	27.7603	27.7165	27.8936	27.8793	27.9935	27.625	0.0769982	0.135629	0.124689
Mbnl2	Q8C181-3	26.2311	25.9944	26.0913	26.2171	26.3538	26.3088	26.2399	26.4874	26.2671	26.8743	26.3782	26.2783	0.077256	0.136011	0.22145
Clns1a	Q923F1	21.9858	23.0096	22.7783	23.3243	22.6658	22.6004	23.0381	23.2352	23.342	22.5028	23.6021	23.5516	0.0779271	0.137121	0.484612
U2af1	Q9D883	27.6154	27.46	27.6205	27.6634	27.7926	27.5339	27.6775	27.9014	27.6464	27.6686	27.6956	27.8457	0.0779952	0.137168	0.12494
Wdr41	B2RQV3	23.1747	23.67	22.9184	23.5999	22.6909	21.6904	22.9732	22.2192	22.7096	22.3071	21.5357	21.3545	0.0781402	0.137351	-0.774172
Arhgap10	Q6Y5D8-3	23.5933	21.6229	22.1823	23.8397	23.3648	23.6187	23.6643	23.7757	23.7899	23.8306	23.8511	23.6903	0.0783193	0.137594	0.730022
Mecr	Q9DCS3	27.1939	27.219	27.0133	26.9164	27.0574	26.8978	27.0708	26.7829	26.822	27.0177	26.6877	26.9525	0.0783683	0.137607	-0.160719
Akt1	D3Z783	25.6296	24.8765	25.1961	25.0077	25.3604	25.3623	25.1127	25.0176	24.9385	24.998	24.9045	25.0974	0.0785628	0.137877	-0.227306
Lrrc41	Q8K1C9	22.6962	22.3056	21.8484	22.5023	23.0319	22.3974	22.6132	22.0721	21.8688	21.37	22.1351	22.011	0.0787652	0.138159	-0.451962
Gmip	Q6PGG2	26.8932	26.8771	26.9311	26.99	26.965	27.1627	26.926	26.7971	26.9878	26.8589	26.7787	26.4686	0.0788358	0.138211	-0.166999
Bcl2l1	A2AHX7	23.41	22.9861	23.564	23.377	23.4699	23.3905	23.5743	23.7421	23.285	23.8197	23.8361	23.3957	0.0791988	0.138774	0.242586
Sdcbp	Q3TMX0	28.2258	28.203	27.9337	28.1906	28.3116	28.2971	28.0887	28.1298	28.0907	28.0385	27.9398	28.1339	0.0793167	0.138908	-0.123372
Ubqln1	Q8R317-2	27.2574	27.1398	27.0969	27.0279	26.6788	26.7853	26.4934	25.8031	26.6576	26.5485	27.3254	26.6103	0.0794826	0.139126	-0.424604
Dcp1a	Q91YD3	23.7451	24.4946	23.677	23.5014	24.1862	23.6506	24.0231	24.1511	24.0986	24.1752	24.359	24.4046	0.0796525	0.13935	0.326121
Gtf2i	G3UYD0	27.4047	27.6336	27.7311	27.7853	27.6557	27.5197	26.5447	27.7789	27.477	27.336	27.3549	27.1627	0.0802957	0.140402	-0.34598
Nudt21	Q9CQF3	27.6451	27.4859	27.6657	27.4917	27.5074	27.5884	27.3608	27.5795	27.3145	27.5598	27.2192	27.5387	0.0808078	0.141224	-0.135302
Ctsc	P97821	27.4782	27.4601	27.5641	27.3504	27.6005	27.5134	27.3311	27.4605	27.1927	27.4485	27.4037	27.4711	0.0808691	0.141257	-0.109853
Aip	O08915	26.9679	26.7798	26.7837	26.7783	26.831	27.0247	26.6779	26.8252	26.6729	26.8716	26.7766	26.6869	0.081039	0.14148	-0.10907
Vamp4	Q8BSN6	24.933	24.9419	25.0988	24.6644	24.8114	25.2571	21.5862	24.2947	24.9129	22.1977	25.1621	24.3905	0.0811139	0.141537	-1.19375
Cd2bp2	Q9CWK3	21.6244	22.6184	21.8774	21.9825	21.6521	22.6976	23.0925	21.7147	22.5113	22.7449	22.9789	22.6342	0.0816455	0.14239	0.537342
Prosc	Q9Z2Y8	26.8687	27.0943	26.6457	27.0002	26.9589	26.7961	27.1455	26.9958	27.0247	27.0613	27.0015	26.9546	0.0817586	0.142513	0.136594
Ints12	Q9D168	22.9813	23.016	23.2324	22.6535	23.0389	22.5469	21.9999	22.3582	22.6146	22.9394	22.7026	22.819	0.0818261	0.142556	-0.339186
Hsbp1	Q9CQZ1	22.6837	24.0777	22.906	24.9651	23.1667	22.9506	22.9885	21.4156	23.5078	21.5579	22.6442	22.9007	0.0832069	0.144887	-0.955821
Rab7	P51150	30.4305	30.3989	30.4593	30.3968	30.4932	30.4861	30.2255	30.4201	30.3362	30.5155	30.3006	30.356	0.0834813	0.145289	-0.0851493
Rfc2	Q9WUK4	26.1769	26.1907	26.2588	26.3254	26.2415	26.3099	26.1135	26.3389	25.919	26.2122	26.1446	26.0448	0.0842217	0.146501	-0.121713
Stx4a	P70452	26.5103	26.6422	26.4992	26.6487	26.3646	26.3732	26.3843	26.1604	26.5183	26.466	26.4172	26.1829	0.0845056	0.146919	-0.15152
Larp7	Q05CL8	24.517	25.0083	24.7048	24.792	24.5685	21.8086	25.6748	25.0217	25.5023	24.8751	24.9897	25.1573	0.0846026	0.147011	0.970278
Aldh3b1	Q80VQ0	24.6354	24.5411	25.185	24.2666	24.4639	24.7454	24.3434	24.1356	24.1983	24.1253	21.4769	24.1534	0.0849679	0.147569	-0.90074
Rtn3	Q9ES97-3	27.7732	27.58	27.7568	27.6695	27.7882	27.7816	27.2015	27.6968	27.3482	27.7044	27.7627	27.5153	0.0857072	0.148776	-0.186742
Nubpl	Q9CWD8	22.8498	21.7387	23.1928	23.0421	22.7827	22.7261	21.8066	22.5551	22.5023	22.0254	22.6653	21.6848	0.0858482	0.148943	-0.515468
Vps39	Q8R5L3-2	24.8506	24.9367	25.4607	25.0561	25.4132	25.1519	22.644	24.9016	24.6396	25.0826	24.8671	24.3707	0.0863126	0.149671	-0.727266
Dld	O08749	30.2472	30.298	30.3469	30.1823	30.2266	30.3095	30.3243	30.387	30.3368	30.2133	30.3629	30.4323	0.0864445	0.149822	0.0743298
Pi4k2a	Q2TBE6	23.2226	22.9111	23.1637	22.7854	23.4424	23.0956	23.2604	23.4153	23.1243	23.493	23.1342	23.7376	0.0867191	0.15022	0.257342
Isoc1	Q91V64	24.5103	24.4838	23.9809	24.752	24.8543	24.7509	24.2797	23.8885	24.3877	22.2318	24.3272	24.1166	0.0870101	0.150646	-0.683459
Ilk	O55222	26.9652	26.9178	26.8393	26.9041	27.0083	26.9329	27.2436	26.8472	26.9589	27.0226	27.2067	27.0343	0.0870706	0.150673	0.124299
Usp5	Q3U4W8	29.217	29.2732	29.2249	29.1546	29.2777	29.1851	29.2034	29.1861	29.1882	29.1859	29.1696	29.1667	0.0875234	0.151378	-0.0387674
Ermp1	Q3UVK0	26.495	25.5517	25.7842	25.6979	25.8807	26.3004	25.3992	25.8375	26.2093	25.2469	24.8982	25.3832	0.0876986	0.151582	-0.455936
Rtcb	Q99LF4	28.672	28.7391	28.7851	28.7503	28.7428	28.6353	28.7998	28.7469	28.7997	28.6664	28.9965	28.9371	0.0877457	0.151582	0.10365
Tex10	Q3URQ0	25.2769	25.3858	25.6469	25.5483	25.952	25.6803	25.6315	24.8794	25.1609	25.5527	25.1978	25.3727	0.0877965	0.151582	-0.282548
Itsn1	F6R6C8	22.7683	22.0192	21.761	23.5298	23.3972	21.806	21.9189	21.6558	21.5927	21.8126	22.0509	22.34	0.0878221	0.151582	-0.651771
Pdcd10	Q8VE70	23.9268	23.9375	24.4039	24.7358	24.683	24.6398	24.5922	22.1737	24.3402	24.6601	21.385	22.157	0.088051	0.151898	-1.16977
H2	P01899	28.1155	28.1443	28.2071	28.0312	28.1286	28.165	28.0381	28.3068	28.147	28.3199	28.2461	28.3695	0.088234	0.152135	0.105957
Tomm6	Q9CQN3	21.6913	22.1928	21.8029	23.2717	23.666	22.9775	23.5842	23.5326	22.1579	23.4601	24.0035	23.6488	0.0890862	0.153526	0.797477
Tsr1	Q5SWD9	26.2839	26.1345	26.275	26.0935	26.3629	26.165	26.2594	26.5331	26.5118	26.7007	26.2544	26.1453	0.0896991	0.154502	0.181616
Slk	O54988-2	28.7659	28.7253	28.6084	28.6336	28.6244	28.5794	28.7085	28.4486	28.5611	28.6038	28.5293	28.568	0.0898081	0.154587	-0.0862862
Mrps6	P58064	24.4566	24.4679	24.2907	21.6126	22.2557	24.5564	25.5476	24.3316	25.5556	24.2161	24.2243	24.4992	0.0898406	0.154587	1.12241
Gfm2	Q8C1C2	24.4863	24.9067	23.9379	24.5453	24.596	24.3322	24.1443	24.459	24.3071	24.3961	23.4636	23.4887	0.0902082	0.15514	-0.424252
Nek7	Q9ES74	25.1801	24.957	24.8893	24.9046	25.1231	25.124	24.614	24.9134	24.4856	25.011	23.7521	21.7751	0.090365	0.155329	-0.937841
Bcs1l	Q9CZP5	24.3747	23.8861	24.2521	24.0013	24.3591	24.2341	24.1627	23.713	24.4514	23.7195	23.5891	23.6396	0.0908273	0.156044	-0.305329
Pdk1	Q8BFP9	22.3738	21.8152	24.7264	24.6216	24.4468	21.6303	22.587	22.6292	21.5232	22.2042	22.064	21.4461	0.0911084	0.156446	-1.1934
Larp4b	Q6A0A2-3	25.8762	25.7789	25.5335	25.6782	25.63	25.9201	25.6105	26.3405	26.1323	25.7232	26.0186	25.9917	0.0912006	0.156524	0.233314
Huwe1	A2AFQ0	26.7081	26.8466	26.6378	26.73	26.9662	26.478	27.5285	26.8464	26.9824	27.0026	26.8271	26.7085	0.0913119	0.156635	0.254787
Dnajb11	Q99KV1	29.0802	28.7899	29.1121	28.9802	28.9094	29.0458	28.6034	28.8782	28.8558	29.0991	28.8108	28.7393	0.0920392	0.157802	-0.155159
2019-09-08	B1AQY9	25.671	25.1063	25.1556	25.1839	24.886	24.9894	25.142	24.3275	22.2122	24.7346	24.9682	24.5587	0.0924269	0.158385	-0.841457
Fbxo22	Q78JE5	23.6474	21.6968	22.5918	23.1341	23.4569	22.3282	22.3907	21.7009	21.6055	22.7711	21.5032	22.6448	0.0927464	0.158851	-0.70649
Golgb1	E9QAH1	22.0758	22.7207	23.2026	21.35	24.9728	25.2554	24.2399	23.4041	24.9864	24.9869	24.9536	24.6815	0.0929219	0.15907	1.27918
Atp5e	P56382	27.8273	27.9206	27.8458	27.5283	27.4413	27.6084	27.6924	27.8799	28.0656	27.8441	27.9704	27.7907	0.0931151	0.15932	0.178566
Csnk2a1	Q60737	28.0129	27.9534	27.9859	27.8901	27.9218	27.9704	27.8928	27.8698	27.8633	28.0565	27.7574	27.7409	0.0933516	0.159564	-0.0923069
Commd10	Q8JZY2	23.9851	23.9636	23.9081	24.5353	24.2505	24.1143	23.9436	24.0361	23.1601	24.003	23.9973	22.4386	0.0933532	0.159564	-0.529722
Pip4k2c	Q91XU3	22.6546	23.8891	23.879	24.0727	21.7068	23.9761	23.6922	24.8279	24.0886	24.3594	24.1211	23.8433	0.0934124	0.159584	0.792362
Dnajc8	Q6NZB0	27.7457	27.7617	27.7623	27.6589	27.8755	27.8468	27.9344	27.4066	27.6562	27.4196	27.5544	27.7104	0.0935577	0.15975	-0.161566
Gm9242	J3QNY1	28.3802	28.9746	28.7672	28.9585	28.651	28.7995	28.5122	28.9889	28.9559	29.1262	29.5684	29.2637	0.0937761	0.160041	0.314049
Cog7	Q3UM29	23.3621	23.2081	23.9881	23.3668	23.3181	23.6421	23.3185	22.1473	23.0801	23.517	23.3753	21.4015	0.0940529	0.160424	-0.674259
Fam129b	Q8R1F1	27.7457	27.7037	27.7761	27.643	27.6988	27.9214	27.8948	27.9244	27.734	28.098	27.905	27.7094	0.094096	0.160424	0.12949
Nhp2	Q9CRB2	27.1017	26.7872	27.1011	26.9176	27.0641	27.0241	27.0214	27.458	27.083	27.15	27.0374	27.1655	0.0942665	0.160632	0.153229
Scarb2	O35114	24.9009	24.276	24.3838	24.8878	25.3672	25.1365	24.6504	24.8462	24.2839	24.4466	23.3679	24.3536	0.0947456	0.161367	-0.500617
Ostf1	Q62422	28.4579	28.409	28.521	28.3689	28.3434	28.4334	28.4794	28.4773	28.3365	28.639	28.6148	28.5693	0.0948407	0.161446	0.0971181
Akr1b3	P45376	30.9441	30.843	30.8952	30.9163	30.8037	30.9053	30.9081	30.9845	30.8717	31.1272	30.9836	30.908	0.0953327	0.162201	0.0792766
Zranb2	D3Z4U0	24.764	25.1298	24.9197	24.832	25.0208	25.275	24.6185	24.7044	24.3173	22.4218	24.7983	24.812	0.0955042	0.162321	-0.711541
Arpc1b	Q91Z25	30.8672	30.8098	30.9087	30.6517	30.7379	30.7474	30.676	30.6988	30.6583	30.7424	30.7982	30.6577	0.0955345	0.162321	-0.0819016
Hmg20a	Q9DC33	22.4793	22.6553	22.2749	22.2577	20.9283	22.1239	22.551	23.1102	22.5063	23.4585	22.5195	22.1051	0.0955483	0.162321	0.588525
Mrpl48	E9QPQ8	23.6242	22.5347	23.3635	23.738	23.2121	23.1851	23.4789	22.736	22.9579	22.1575	23.0438	22.4345	0.0957528	0.162444	-0.474824
Ypel5	P62700	24.1767	23.2352	23.4852	23.5573	23.6999	23.2647	23.1062	21.7319	23.3998	22.0926	23.5523	23.5992	0.0957613	0.162444	-0.656176
Ppif	Q99KR7	22.0007	24.7945	21.7765	24.4205	24.5079	24.8052	25.4981	24.5121	24.5529	24.5141	25.0303	24.8613	0.0957666	0.162444	1.11058
Trim23	Q8BGX0-3	24.3026	24.5015	24.5837	24.3614	24.8421	24.4523	23.6874	24.3027	24.4964	24.6483	24.1561	23.9259	0.0959256	0.162591	-0.304472
Snrpd2	P62317	28.8404	28.7864	29.0093	28.8244	28.8531	28.9073	28.8755	28.9106	29.0039	28.8577	29.0487	29.0627	0.0959504	0.162591	0.0896681
Copg2	Q9QXK3	26.4405	26.4735	26.4185	26.4205	26.824	26.5938	26.3492	26.3664	26.5982	26.3886	26.0468	26.3541	0.096105	0.16277	-0.177889
Psmb10	O35955	25.4284	25.3724	25.6132	25.0637	25.6899	25.3564	24.9371	25.388	24.9501	25.4659	25.1265	25.2513	0.0962188	0.16288	-0.234191
Wnk1	P83741-4	22.657	24.685	24.4654	24.4646	24.585	24.7668	22.0171	22.2177	24.3444	24.3233	24.2386	21.5537	0.0963343	0.162994	-1.15484
E430025E21Rik	Q8C2E7	23.7668	23.2614	24.1678	24.8691	24.0364	23.4721	23.59	23.6885	23.2188	23.5028	23.3508	23.5426	0.0964095	0.163038	-0.44669
Rbm3	O89086	27.3568	27.9693	27.1517	27.8013	27.5841	27.3655	27.6907	26.926	27.4612	26.3086	27.2612	27.0103	0.0966478	0.163359	-0.428475
Rab3il1	D3Z585	23.4695	23.4873	22.6727	23.5687	23.624	23.2437	23.252	22.8792	23.0559	23.2356	22.5143	23.1117	0.096895	0.163694	-0.336193
Lrrc40	Q9CRC8	26.0937	26.0002	25.8737	26.0732	26.28	26.2738	26.2871	25.9135	25.9701	25.682	25.848	25.5851	0.0973776	0.164426	-0.218111
Prps1l1	Q8C5R8	26.9384	26.7448	26.6751	26.8251	26.5868	26.4817	26.4032	26.5259	26.3761	26.7519	26.6899	26.5045	0.0974871	0.164454	-0.166732
Wdr91	Q7TMQ7	25.6659	25.9824	26.1352	25.7307	25.7193	25.8968	25.4563	25.558	25.5593	25.9438	25.7328	25.7454	0.0975129	0.164454	-0.189111
Trappc8	E9PWG2	22.6283	22.162	22.7363	22.7049	23.2545	22.2682	22.9908	22.0232	22.5546	21.6753	21.942	21.5647	0.0975414	0.164454	-0.500632
Ppm1f	Q8CGA0	24.7809	24.5103	24.4367	24.73	24.8092	24.7067	24.776	24.3227	24.7358	23.9481	24.298	24.3518	0.0976281	0.164517	-0.256904
H3f3a	P84244	29.8874	30.8095	29.4548	30.5478	29.5283	29.3587	31.8448	30.657	31.494	29.5484	30.256	30.4364	0.0978524	0.164812	0.77503
Gosr1	O88630	22.5989	21.7168	21.6308	22.5703	21.9646	22.145	23.6054	23.4858	23.0156	22.9409	21.8549	21.7428	0.0982561	0.165408	0.669841
Dpm1	O70152	26.2597	25.8323	25.5946	26.1238	26.5173	26.3445	25.7308	25.834	25.4188	26.2284	25.8281	25.7077	0.0984979	0.165675	-0.320696
Tnpo1	Q8BFY9-2	28.8012	28.8	29.0018	28.8851	28.7987	28.9087	28.879	28.8924	28.8891	29.1778	29.0777	28.9411	0.0985358	0.165675	0.110283
Get4	D3Z4J5	23.2584	23.4915	23.684	23.5894	22.5734	23.4251	21.6977	23.3074	22.4445	23.3357	23.1179	22.786	0.0985629	0.165675	-0.555443
Vamp8	O70404	27.2679	27.3272	27.4676	27.3903	27.1815	27.4404	27.4336	27.5017	27.3259	27.3803	27.635	27.48	0.0988742	0.166115	0.113599
Rpp30	O88796	26.0835	26.2427	26.6225	26.2583	26.1716	26.0504	26.2265	26.3769	26.5579	26.461	26.4117	26.4333	0.0989796	0.166208	0.173042
Tmx4	A2ARI0	24.5794	24.4379	23.5023	24.2423	24.2511	23.7596	21.7919	23.9325	23.8669	23.7861	23.8641	23.4024	0.0990771	0.166289	-0.688113
Osbpl8	B9EJ86	28.4813	28.4183	28.6008	28.4684	28.6519	28.5596	28.1565	28.461	28.3193	28.5781	28.384	28.5053	0.099185	0.16636	-0.129353
Isg20l2	Q3U1G5	23.4432	23.4948	23.4017	23.4565	23.5378	23.5029	23.3857	23.7078	23.5761	23.6327	23.4668	23.6518	0.099219	0.16636	0.0973365
Nup210	Q9QY81	26.0396	25.695	25.9127	25.9103	25.8455	25.774	25.7749	25.6803	25.8253	25.8195	25.8061	25.5932	0.0993708	0.166531	-0.11297
Stat5a	A2A5D3	23.9362	22.6318	22.3523	21.5728	22.7225	24.4438	22.0716	21.7327	22.643	22.5767	21.5201	22.0243	0.100795	0.168833	-0.848511
	CON__P13645	27.0401	24.0166	26.1416	27.2856	26.5547	26.5072	27.9885	26.6491	27.9451	27.1943	27.1621	26.4882	0.101003	0.720788	0.0489592
[truncated: 1,347 more rows]
