# Supplementary material for: Molecular Signatures of Neuroinflammation Induced by αSynuclein Aggregates in Microglial Cells
Source: Front Immunol. 2020 Jan 31;11:33. doi: 10.3389/fimmu.2020.00033 (PMC7006296; doi:10.3389/fimmu.2020.00033)
Supplement: Supplementary file 2 [file Data_Sheet_2.xlsx]

## Sheet: Sheet1
Supplemental Table 2. Comparion of Syn and LPS-induced proteomic changes in microglia
		Alpha-Syn-agg vs Control MS results (Sarkar et. al.)		LPS vs Control MS results (Rangaraju et. al. J Neuroinflammation 2017)
GeneSymbol	UniqueID	Unadj_Pvalue	Log2FC(SynvsCon)	Log2FC_LPS	UnadjPval_LPS
Irg1	P54987	5.77515e-10	11.3468	3.74189	4.33337e-06
Saa3	P04918	4.91024e-10	4.75712	4.533	0.00262752
Marcksl1	P28667	1.01104e-09	2.66357	1.06001	0.00271879
Itga5	P11688	0.00108118	2.45866	0.560778	0.0154239
Slc2a1	P17809	0.00400518	2.24457	-0.335428	0.108028
Nufip2	Q5F2E7	1.18095e-06	2.22788	-0.257339	0.516278
Lrrc25	Q8K1T1	0.00875401	2.15398	1.19919	0.0520764
Eny2	Q9JIX0	0.315362	-0.560365	-0.896072	0.212469
Sqstm1	Q64337	1.2171e-10	1.91039	2.13257	0.000161217
Exosc2	Q8VBV3	0.178968	0.249042	-0.785206	0.255683
Cdk2	P97377-2	0.454379	0.0836243	-0.774632	0.215191
Myo1c	Q9WTI7-2	0.734725	-0.0279533	-0.749293	0.334203
Cebpb	P28033-3	0.000480069	1.71111	0.885667	0.0950546
Lcp2	Q60787	4.45665e-06	1.67619	0.825419	0.00102045
Gnl2	Q99LH1	0.0151079	1.98187	-0.162567	0.575246
Nadk	P58058	0.0026674	1.56586	1.16831	0.0232826
Cyb5r1	Q9DB73	0.0107418	1.55574	0.286992	0.0650186
Ehd1	Q9WVK4	1.10023e-08	1.53976	2.04522	0.000841345
Icam1	P13597-2	1.06506e-06	1.45551	1.08584	0.00715219
Tap1	Q3TBA3	0.000819633	1.44146	0.975626	0.00139922
Ifi204	E9QKL6	7.96793e-10	1.4219	1.15962	0.190345
Ifi204	Q08619	1.17908e-08	1.4219	1.15962	0.190345
Ifi204	P15092-2	4.59379e-06	1.4219	1.15962	0.190345
Src	Q80XU2	0.00089814	1.41574	0.38814	0.0392788
Clybl	Q8R4N0	0.00126158	1.90028	0.0225127	0.888047
Hmgcs1	Q8JZK9	9.52002e-05	1.34049	-0.144697	0.14508
Stat1	Q8C3V4	2.37566e-09	1.32526	0.872794	0.176627
Rnf114	Q9ET26	0.00387706	1.86152	-0.187918	0.580384
Ppil1	Q9D0W5	0.0414057	1.8579	-0.18772	0.515194
Exosc1	Q9DAA6-2	0.298908	0.417457	-0.667281	0.285897
Esf1	Q3V1V3	6.74339e-05	1.57113	0.0213468	0.901218
Ddx24	F8WJA0	0.000373064	1.37719	0.465897	0.311616
H2afx	P27661	0.67956	0.0222771	-0.612947	0.393309
Gatad2a	E9QMN5	0.0304781	1.29727	-0.259597	0.321815
Zfp326	O88291	0.00104669	1.16517	-0.405505	0.154314
Tapbp	Q3TCU5	0.00034793	1.15585	0.982184	0.0031658
Nfkb2	Q9WTK5	1.48191e-05	1.15146	0.741775	0.00325654
Dcaf13	Q6PAC3	6.87398e-05	1.13321	-0.366118	0.0904174
Usp10	P52479	0.154845	0.198875	-0.579994	0.395723
Naa40	Q8VE10	0.247241	-0.21605	-0.562239	0.209532
Eif2b1	Q99LC8	0.00136793	1.28114	0.191466	0.576889
Utp11l	Q9CZJ1	0.0387403	1.26491	-0.114997	0.632527
Naa10	Q3V4D5	0.0487313	1.24029	-0.108169	0.5594
Dohh	Q99LN9	0.0247373	1.06121	-0.862778	0.0316255
Ddx10	Q80Y44	0.000169767	1.22745	0.228885	0.358956
Vps36	Q91XD6	0.0299108	1.05422	-0.669353	0.0628231
0610037L13Rik	D6REH4	0.0227743	1.18065	0.149723	0.506394
Slc15a3	Q8BPX9	0.00830113	1.04959	1.16185	0.0890279
Mylk	B1B1A8	0.023789	1.1749	0.0656637	0.799661
Tceb3	Q8CB77	0.00374957	1.03067	-0.343101	0.0470647
Actg1	P63260	0.0133676	1.02411	0.778073	0.0120552
Eif2ak2	Q03963	1.98804e-05	1.02248	0.281481	0.162663
Prps1l1	Q8C5R8	0.0974871	-0.166732	-0.537431	0.291407
Nup153	E9Q3G8	0.000163584	1.01004	-0.0923086	0.165688
Alas1	Q8VC19	0.00128951	1.00459	0.472624	0.0319966
Wtap	E0CYH0	8.27173e-05	0.990477	0.883981	0.0978202
Hnrnph2	P70333	0.00439531	0.985965	-0.214273	0.138
Ccdc90b	Q8C3X2-2	0.398707	0.113468	-0.529059	0.345811
Nle1	Q8VEJ4	4.42549e-07	0.96332	-0.540385	0.0732052
Pam16	Q9CQV1	0.494762	-0.434218	-0.525526	0.241469
Rpl35	Q6ZWV7	0.00095094	0.947412	-0.198356	0.0668389
Caprin1	Q60865	2.01431e-08	0.944947	-0.412593	0.0552646
Flnb	Q80X90	0.00136662	1.13299	0.0961861	0.275913
Clic4	Q9QYB1	1.95046e-10	0.92271	0.387428	0.00279523
2410016O06Rik	Q9JJF3	0.989925	-0.00386385	-0.517737	0.417923
Lig1	Q3U4X8	0.92637	0.00774062	-0.511681	0.251377
Slc38a1	Q8K2P7-2	0.280345	0.393291	-0.505653	0.359018
Oas1a	P11928	4.42211e-09	0.905961	1.436	0.0574067
AI607873	D3Z2E7	2.46965e-07	0.89587	-0.264504	0.0649457
Sod2	P09671	4.35116e-07	0.8919	0.689157	0.00222733
Ppm1g	Q61074	1.70094e-08	0.883209	-0.144875	0.119316
Nmral1	D3YU12	0.886167	-0.0179963	-0.505569	0.37284
Cdan1	Z4YL55	0.544238	-0.191285	-0.5031	0.241446
Hist1h3h	P68433	0.226106	0.670102	-0.502711	0.477923
Mina	Q8CD15	0.00445402	1.11865	0.385285	0.303942
Rbm7	Q9CQT2	0.540519	-0.113557	-0.496945	0.313899
Zc3hc1	H3BKM2	0.00223973	1.10983	-0.172633	0.523978
Tmpo	Q61033	0.410306	0.00099706	-0.491623	0.202777
Tmpo	Q61029	0.983811	0.00099706	-0.491623	0.202777
LOC102641341	P62322	0.305013	-0.251312	-0.489325	0.293522
Ppp1r10	Q80W00-2	0.0145036	0.809326	-0.936891	0.102063
Oas3	Q8VI93	5.43639e-08	0.806982	1.34376	0.179382
Ppp2r5d	Q91V89	0.0304342	1.08485	-0.735987	0.375243
Uba52	P62984	0.0514142	0.761367	-0.486674	0.26451
Pdk1	Q8BFP9	0.0911084	-1.1934	-0.48657	0.247802
Cd14	P10810	4.00484e-07	0.792239	1.57067	0.119408
Akr7a5	Q8CG76	0.13565	-0.373179	-0.484156	0.341714
Mrpl54	Q9CPW3	0.252079	0.461677	-0.481516	0.438007
Asns	Q61024	1.83494e-10	0.769813	0.364833	0.0266815
Qk	Q9QYS9-8	0.279308	0.221191	-0.480756	0.233826
Eps15	Q5JC28	0.1806	-0.293272	-0.478513	0.247239
Carm1	D3YUP1	0.543442	0.0514486	-0.475201	0.243936
Gripap1	A2AEW9	0.0461835	1.07528	-0.179108	0.448091
Wdr75	Q3U821	3.46251e-05	0.746193	-0.439479	0.194723
Prkag1	O54950	0.640675	-0.104172	-0.470427	0.473919
Slc3a2	P10852	2.81115e-11	0.727868	0.256597	0.0232795
Ylpm1	E9Q803	0.0101635	1.05538	0.13959	0.353896
Myd88	P22366	0.0125933	0.719364	-0.69384	0.10245
Cmss1	Q9CZT6	0.850672	0.0309726	-0.464925	0.311695
Rnf213	F7A6H4	1.27041e-11	0.713931	1.86946	0.0173753
Pno1	Q9CPS7	0.654849	0.086784	-0.463942	0.246301
Ddx21	Q9JIK5	1.21406e-08	0.709251	-0.187188	0.066323
Wdhd1	E9QPB3	0.811529	0.0617758	-0.46392	0.202497
Tes	Q3ULB1	0.00224877	0.703304	0.225741	0.0129605
Commd10	Q8JZY2	0.0933532	-0.529722	-0.45349	0.57615
Mlkl	Q9D2Y4-2	6.85453e-09	0.701082	0.352619	0.11408
Nampt	Q99KQ4	1.14539e-08	0.695052	0.345827	0.00769263
Zfr	O88532	0.0204897	1.05112	-0.128799	0.641444
Tmem214	D3Z6S1	0.148874	-0.610145	-0.432655	0.203941
Marcks	P26645	4.96625e-06	1.04855	0.15412	0.410658
Sec24d	Q6NXL1	0.0300451	0.675409	0.319809	0.0565844
BC017643	Q3TYS2	0.00268208	0.674353	-0.593113	0.105946
Ccdc51	Q3URS9-2	0.384008	0.143374	-0.426509	0.324618
Cd3eap	Q76KJ5	0.0604014	1.17133	-0.423856	0.262793
Srpr	Q9DBG7	1.02358e-07	0.669087	0.170047	0.160176
Acsl1	D3Z041	0.000180054	0.668655	0.96752	0.00204751
Dph5	Q9CWQ0	0.57853	-0.312459	-0.420313	0.224595
Vasp	P70460	1.17182e-07	0.666707	0.66426	7.60388e-05
Zak	Q9ESL4-2	0.272939	-0.174742	-0.41497	0.261276
Uck2	A0A0B4J1E5	0.0422844	0.659135	-0.418245	0.185819
Ahctf1	Q8CJF7	0.349522	-0.527927	-0.414147	0.215868
Ptk2b	E9Q2A6	0.000536762	1.01453	0.168895	0.453425
Gbf1	Q6DFZ1	0.619412	0.210228	-0.410003	0.387986
Bak1	Q91WX5	0.402482	-0.106312	-0.408332	0.411464
Dnaja1	P63037	8.14242e-08	0.639183	-0.317125	0.0285005
Armc6	Q8BNU0	4.29578e-05	0.966502	-0.256014	0.48239
Vcpip1	Q8CDG3	0.199924	-1.57761	-0.40573	0.458519
Dnajc7	Q9QYI3	4.96972e-06	0.627643	-0.255538	0.100095
Polr1d	P97304	0.656669	0.280814	-0.404669	0.221142
Os9	Q8K2C7-2	0.449554	0.113599	-0.403819	0.251222
Nifk	Q91VE6	1.79429e-06	0.622202	-0.238773	0.139094
Plek	Q8CAG6	2.255e-08	0.61963	-0.166462	0.11534
Ufsp2	Q99K23	0.104268	-0.6269	-0.399317	0.317541
Nop14	Q8R3N1	5.26169e-06	0.614974	0.254964	0.0778093
Ass1	P16460	6.32092e-09	0.613225	0.873052	0.00413436
Arl11	Q6P3A9	0.775718	-0.0986166	-0.398582	0.455621
Pcyt2	A2ABY3	0.329526	-0.307212	-0.398487	0.544194
Eif4a1	P60843	8.81407e-06	0.608642	-0.154072	0.185057
Rbm22	Q8BHS3	0.826774	0.173062	-0.398372	0.214399
Gnpnat1	Q9JK38	0.110288	-0.173868	-0.397962	0.473849
Gemin5	A2AFQ9	0.0105075	0.605738	0.547484	0.0294204
Nhlrc2	Q8BZW8	0.0121687	0.955499	0.23389	0.566324
Siglec1	G3X8X6	1.78128e-06	0.601901	1.2977	0.0245218
Sec61b	Q9CQS8	0.000846416	0.59934	0.312874	0.026442
Ankrd17	E9QKG6	0.000744106	0.940445	0.0146438	0.975118
Rbbp4	Q60972	0.000709761	0.588195	-0.143724	0.0434537
Sh3glb1	Q3TYR7	0.000529781	0.587933	0.205837	0.0958195
P4ha1	Q60715-2	9.07152e-08	0.58753	-0.237435	0.0589256
Sf3a2	G3UVU2	2.79968e-05	0.917697	0.0336395	0.838223
Ndufb9	Q9CQJ8	0.820678	-0.0434352	-0.383607	0.23639
Mrps31	Q61733	0.227212	0.230885	-0.376771	0.284393
Rock2	F8VPK5	0.0439166	0.917	0.110228	0.707675
Agfg1	A0A087WNV1	0.000173085	0.578114	0.349815	0.0621586
Gapdh	A0A0A0MQF6	1.65256e-05	0.57663	0.195587	0.0288844
Snrpb	P27048	2.23688e-06	0.909633	-0.038986	0.73432
Eif4g2	G3XA17	1.87072e-06	0.569206	0.166506	0.140936
Yy1	Q00899	0.0218835	0.875129	0.346426	0.315695
Cd44	Q3U8S1	4.49164e-08	0.868674	0.135302	0.307833
Crnkl1	P63154	0.275521	-0.345092	-0.367772	0.420421
Aars	Q8BGQ7	3.52156e-08	0.559172	0.337801	0.000122992
Rpp30	O88796	0.0989796	0.173042	-0.362625	0.241347
2410015M20Rik	Q8R404	0.16153	0.476347	-0.359595	0.249861
Stub1	Q9WUD1	0.000254736	0.554955	0.362688	0.0488901
Dgkz	A2AHJ7	0.120555	-0.379691	-0.359334	0.394976
Prkra	Q9WTX2	0.226322	-0.50235	-0.358914	0.217363
Csde1	Q91W50	1.35528e-07	0.548873	-0.120308	0.179331
Ube2c	A2A4Z1	0.118714	-1.11633	-0.358616	0.264278
Arl2	Q9D0J4	0.259836	-0.138219	-0.358277	0.348181
Ppig	A2AR02	0.0307667	0.861404	0.154569	0.313456
Dtymk	P97930	0.553883	-0.338602	-0.35493	0.538784
LOC102642514	Q9CR47	0.0021386	0.5421	-0.526981	0.12508
Gtf3c4	Q8BMQ2	0.563581	-0.236899	-0.354484	0.301886
Gtpbp4	Q99ME9	9.07393e-07	0.538995	0.324011	0.165942
Rsl1d1	Q8BVY0	4.14541e-07	0.538247	-0.105422	0.0387078
Slc39a7	Q31125	0.0354653	0.850203	0.20775	0.284041
Camk1	Q91YS8	0.440661	-0.0690482	-0.351412	0.398488
Lima1	Q9ERG0-2	3.81032e-05	0.83837	0.0467729	0.467337
Polr2a	P08775	0.941516	0.00638972	-0.350364	0.306528
Cdk2ap1	F2Z4B3	0.382175	0.209825	-0.345393	0.404783
Ckb	Q04447	0.157631	0.0608536	-0.343152	0.32788
Rrs1	Q9CYH6	6.80317e-06	0.520112	-0.203062	0.0161918
Mcu	Q3UMR5	0.197372	-0.577064	-0.340957	0.414427
Thoc6	Q5U4D9	0.0267918	0.829777	0.252184	0.316198
Cirh1a	Q8R2N2	2.37168e-05	0.82008	-0.410932	0.34097
Brk1	Q91VR8	0.261376	-0.153197	-0.334536	0.48608
Myl12b	Q3THE2	2.22881e-05	0.509208	0.276086	0.1146
Gm4184	P60060	0.0115535	0.815585	0.107754	0.765111
Rpl7l1	Q9D8M4	0.843614	-0.0545095	-0.329474	0.222295
Rbbp6	P97868-2	0.0506606	0.819447	-0.328885	0.356927
Larp4	E9Q066	0.00998268	0.809515	-0.0814369	0.565807
Lrrc59	Q922Q8	1.82188e-08	0.50177	0.248644	0.144077
Emc7	Q9EP72	0.371537	-0.870529	-0.326938	0.251785
Vamp3	P63024	0.051797	-0.293399	-0.325545	0.209782
Ciapin1	E0CYY1	0.000746825	0.80059	0.726728	0.215048
Txlna	Q6PAM1	0.0437575	0.49664	-0.390774	0.149955
Rpl39	P62892	0.000236439	0.797169	0.188447	0.519073
Snap23	Q9D3L3	0.795816	-0.0144515	-0.321082	0.266274
Mat2b	Q99LB6-2	0.760457	-0.0326858	-0.321082	0.355081
Wdr46	Q9Z0H1	0.00137187	0.795713	-0.140717	0.417961
Rcor1	K3W4P9	0.563921	0.157666	-0.315057	0.391072
Ngdn	Q9DB96	0.000291618	0.787701	-0.293604	0.416016
Luc7l2	Q7TNC4-4	2.21915e-08	0.78575	-0.138163	0.31999
Rhoc	Q62159	0.00877299	0.487949	0.200267	0.0803079
Mms19	Q9D071-3	0.795961	-0.0482816	-0.308187	0.413348
Eif1a	Q60872	0.00286911	0.487156	0.819362	0.0443181
Eif3e	P60229	8.8589e-06	0.484441	-0.199071	0.11825
Git2	F7BIK4	0.414008	0.262266	-0.305871	0.426011
Crlf3	Q9Z2L7-2	0.0273523	0.766138	0.188445	0.294661
Fxr2	Q6P5B5	0.00390656	0.479131	0.282969	0.157779
Utp20	E9QK83	0.528816	0.0820578	-0.303665	0.326614
Rmdn3	Q3UJU9	0.0115819	0.7641	0.240535	0.353952
Lsg1	Q3UM18	0.00992941	0.755169	-0.143067	0.662471
Usp15	Q8R5H1-5	0.000930372	0.476497	-0.96616	0.0844715
Utp14a	Q640M1	0.00022424	0.749776	0.0854541	0.720758
Drg2	Q9QXB9	0.846047	0.024089	-0.297803	0.428903
Sec61a1	P61620	1.60237e-05	0.738173	-0.064728	0.807375
Stxbp1	O08599	0.00110501	0.468065	1.26878	0.03887
Hk2	O08528	2.53426e-07	0.465375	-0.217101	0.00583055
Tcerg1	Q8CGF7-2	0.31758	0.0617348	-0.296442	0.395497
Nol11	Q8BJW5-2	0.000690115	0.465033	-0.489802	0.0924754
Tubb6	Q922F4	8.30313e-06	0.46394	0.178609	0.0270838
Srsf7	Q8BL97-3	0.000232965	0.463644	-0.255168	0.0767343
Eif5b	Q05D44	1.11205e-05	0.721545	0.145973	0.395599
Fam129b	Q8R1F1	0.094096	0.12949	-0.291746	0.316923
Nop2	E9QN31	1.45288e-07	0.461484	-0.172047	0.083155
Commd2	Q8BXC6	0.43554	-0.0983152	-0.291632	0.460333
Gtf2i	G3UYD0	0.0802957	-0.34598	-0.289466	0.319695
Hmga2	P52927	0.000320841	0.718338	0.0230711	0.833197
Bzw2	Q91VK1	0.000421872	0.71109	0.125065	0.391046
Nono	Q99K48	1.74803e-05	0.455025	-0.0843363	0.12406
Iars	Q8BU30	2.35052e-07	0.452037	0.0956283	0.100684
Vps45	P97390	0.0608346	-0.440183	-0.285174	0.450057
Otulin	Q3UCV8	0.647481	-0.14058	-0.284925	0.301644
Wdr36	Q3TAQ9	0.139343	0.135274	-0.282368	0.560411
Elmo1	Q8BPU7	0.733521	0.0104567	-0.282131	0.405777
Ddx54	Q8K4L0	0.0221379	0.707551	-0.466294	0.434444
Eif3m	Q99JX4	0.780615	0.0392525	-0.279996	0.447284
Atp13a1	Q9EPE9	0.00976946	0.702422	-0.440903	0.341947
Zfp207	Q9JMD0-4	0.00629182	0.442191	-0.292637	0.0845413
Zc3hav1	D3Z5I1	0.024103	0.442136	0.199665	0.0235763
Hmga1	P17095	0.00450773	0.439861	-0.529596	0.175329
Hmga1	P17095-1	0.0122743	0.439861	-0.529596	0.175329
Rbm39	Q8VH51-2	1.20302e-06	0.439688	-0.31196	0.0810475
Arfip2	Q8K221	0.454964	0.323647	-0.278363	0.431222
Pef1	Q8BFY6	0.0537946	-0.698459	-0.278295	0.44415
Ddx42	Q810A7-2	7.23779e-06	0.693195	-0.14875	0.470902
Pwp2	Q8BU03	0.331561	0.120965	-0.274263	0.430686
Ubr5	E9Q2H1	0.352377	0.202392	-0.273963	0.458997
Mov10	D3YVL0	0.798306	0.0248134	-0.273901	0.47214
Ndufs7	Q9DC70	0.0575393	-0.720773	-0.273486	0.278488
Eif3h	Q91WK2	8.3442e-07	0.681692	0.0931507	0.227826
Sec23ip	G3X928	0.00027455	0.432757	0.131292	0.161504
Ythdf1	A2AWN8	0.00255415	0.432203	-0.385859	0.125679
2700060E02Rik	Q9CQE8	2.00734e-06	0.431565	0.116245	0.0971411
Cisd2	Q9CQB5	0.166937	-0.282483	-0.272156	0.425262
Tuba1c	P68373	0.000252371	0.67805	-0.0545387	0.899289
Eif3d	O70194	3.39643e-07	0.671068	-0.0383927	0.665135
Cdc73	Q8JZM7	0.00150234	0.426415	-0.563763	0.0352961
Mthfd2	P18155	0.000718936	0.426286	0.318392	0.0351221
Por	P37040	4.65482e-07	0.424684	0.228771	0.0224686
Ddx3x	Q62167	8.93865e-08	0.424217	-0.218981	0.0327658
Trip12	A0A087WNZ7	0.449837	-0.11983	-0.266672	0.292019
Atxn2l	Q7TQH0-2	0.000191676	0.670469	0.0484451	0.754512
A430005L14Rik	A0A0A0MQL2	0.127135	-0.407725	-0.263822	0.434664
Pkn1	D6RH37	0.616168	-0.181972	-0.262762	0.264584
Stat3	P42227-2	8.38603e-06	0.66849	0.213606	0.456242
Ube3a	O08759-2	0.869559	-0.0170773	-0.262481	0.453677
Vim	P20152	3.63684e-07	0.419255	-0.36746	0.000815758
Polr1c	D3Z3D6	4.28779e-05	0.417802	-0.349231	0.0112664
Hist2h3c1	P84228	0.398352	0.0926666	-0.261215	0.443345
Ncapg	E9PWG6	0.134878	-0.852083	-0.260625	0.423556
Samhd1	F8WJE0	3.84601e-05	0.662365	-0.123144	0.306863
Kpna3	O35344	4.22185e-06	0.414167	0.193807	0.056846
Ncaph	Q8C156	0.757051	0.101913	-0.259603	0.283244
Srrt	Q99MR6-3	2.40353e-06	0.411216	-0.207935	0.0138008
Seh1l	Q8R2U0-2	0.0154278	0.655502	0.109879	0.788907
Rbm28	Q8CGC6	3.37684e-05	0.40675	-0.152354	0.175077
Pdxdc1	Q99K01-2	0.00321311	0.405191	0.155588	0.106839
Dbnl	Q62418-3	2.61685e-07	0.404511	-0.182421	0.0206027
Rrp7a	Q9D1C9	3.19833e-05	0.652005	0.0564292	0.849952
Smu1	Q3UKJ7	6.62019e-05	0.402668	-0.272645	0.0337696
LOC100862468	Q9D0T1	1.86453e-05	0.401598	-0.254091	0.0560606
Eef1e1	Q9D1M4	3.61547e-07	0.650977	-0.112217	0.700728
Gmps	Q3THK7	0.000305302	0.400125	-0.211504	0.0140499
Utp18	Q5SSI6	0.000504719	0.650364	0.00219579	0.981569
Idh3a	Q9D6R2	0.00393509	0.399482	-0.0992653	0.130529
Hnrnpf	Q9Z2X1	4.98377e-06	0.398393	-0.193804	0.13801
Eef1a1	P10126	5.73871e-10	0.635267	-0.0595702	0.560146
Utp15	Q8C7V3	1.29198e-05	0.628274	-0.0193552	0.899048
Dnttip2	Q8R2M2	0.000141811	0.624611	0.312481	0.421468
Nup155	Q99P88	0.237845	0.062774	-0.249949	0.286243
Pelp1	Q9DBD5	0.678482	0.0497969	-0.248971	0.301913
Pabpc4	Q91YZ8	5.68164e-07	0.622377	-0.118572	0.494758
Hnrnpdl	F6VQH5	0.000214871	0.617104	-0.190597	0.273552
Cc2d1b	F6XC25	0.894551	0.0836902	-0.245521	0.24765
Lman1	Q9D0F3	3.86446e-06	0.386866	0.428378	0.0560913
Abcf2	Q99LE6	8.06499e-06	0.611891	-0.0818216	0.42454
Nop10	Q9CQS2	5.2202e-06	0.611108	0.0910911	0.710147
Hsp90ab1	P11499	6.26825e-09	0.608046	0.0209704	0.489427
Fkbp4	P30416	1.3836e-05	0.382738	-0.159424	0.128479
Eif4a3	Q91VC3	7.16894e-08	0.381604	-0.293677	0.0280211
Rap2c	Q8BU31	0.00128296	0.605912	0.0352367	0.933895
Pdcl3	Q8BVF2	0.0022105	0.604672	-0.0311883	0.839557
Mrps27	Q8BK72	0.34274	0.0578773	-0.237606	0.219512
Ddx5	Q8BTS0	1.2072e-07	0.378959	-0.105102	0.066707
Kctd12	Q6WVG3	0.000857102	0.377874	0.806919	0.180721
Fkbp5	Q64378	0.02477	0.377815	-0.193499	0.0220105
Rplp1	P47955	0.141123	0.125191	-0.237495	0.563567
Hdac1	O09106	0.00166243	0.374975	-0.211557	0.0140711
Lamtor2	Q9JHS3	0.877288	0.012002	-0.23745	0.249703
Imp4	Q8VHZ7	0.00128602	0.59518	-0.0588074	0.839387
Rrp9	Q91WM3	3.01038e-07	0.586224	-0.00172149	0.993496
Mybbp1a	Q7TPV4	3.88508e-07	0.373182	-0.0929364	0.127299
Gmpr	Q9DCZ1	0.248257	-0.724013	-0.2347	0.346993
Imp3	Q921Y2	0.000108144	0.585104	-0.271465	0.622723
Dock10	A0A087WRP5	0.00320466	0.369178	0.681341	0.0444174
Tceb1	A0A087WQE6	0.000182081	0.584708	0.101538	0.221673
Rbm19	Q8R3C6	0.00050752	0.582855	-0.0290991	0.944913
Top2a	Q01320	4.9807e-06	0.364301	-0.300293	0.0523157
Mrpl38	Q8K2M0-2	0.419908	-0.08638	-0.232673	0.360341
Psmd14	O35593	0.00738667	0.363254	0.0724099	0.197847
LOC102643269	P35550	1.05335e-07	0.569627	0.0548904	0.536093
Gnai3	Q9DC51	0.31242	-0.0956886	-0.230264	0.516847
Gls	D3Z7P3-2	0.00992365	0.358828	-0.325951	0.15835
Fcho2	F6RG68	0.459824	-0.197076	-0.22801	0.358712
Pabpc1	P29341	4.7401e-11	0.566418	-0.169285	0.528798
Sf3a3	Q9D554	0.000487786	0.357711	-0.23456	0.104831
Far1	Q922J9-3	0.40799	0.0767397	-0.227685	0.319266
Slc25a22	Q9D6M3	0.000156594	0.562225	0.302212	0.473344
Snd1	Q78PY7	2.35278e-07	0.354791	0.123343	0.023262
Ncf1	F8WH69	0.000289295	0.354347	0.557634	0.010109
Ptpn23	Q6PB44-2	0.00339018	0.353025	0.458633	0.0226647
Zw10	O54692	0.214211	-0.136704	-0.226904	0.279575
Apbb1ip	Q8R5A3	0.00100082	0.351765	-0.477526	0.0144477
Ppif	Q99KR7	0.0957666	1.11058	-0.226729	0.43931
Usp19	E9Q9M5	0.142636	-0.579377	-0.225959	0.215897
Gk	Q64516-1	0.00124247	0.559937	-0.354449	0.31777
Sfpq	Q8VIJ6	8.30724e-06	0.344366	-0.113674	0.0725576
Fasn	P19096	4.84221e-09	0.341808	-0.259913	0.00641198
Uqcrfs1	Q9CR68	0.726985	-0.0174502	-0.224502	0.378841
Pcmt1	F6V9F1	0.565475	-0.586918	-0.224497	0.297309
Ranbp3	Q9CT10	0.976097	-0.00232737	-0.224196	0.401425
Srsf10	Q3TFP0	0.000171526	0.558195	-0.245233	0.39194
Nudcd1	Q6PIP5	3.28129e-05	0.55805	0.3358	0.477738
Nisch	Q80TM9	0.000685495	0.55051	0.15952	0.427587
Tfrc	Q62351	6.17631e-06	0.337912	-0.232981	0.165266
Smndc1	Q8BGT7	0.00124038	0.549808	-0.133195	0.746278
Dnaja2	Q9QYJ0	1.23573e-06	0.546387	0.148561	0.209528
Fam49a	Q8BHZ0	0.365203	0.0790356	-0.222323	0.511219
Rpl32	P62911	5.23045e-05	0.333417	-0.156731	0.179843
Npm1	Q61937	3.93307e-06	0.546159	-0.105193	0.287402
Hdlbp	Q8VDJ3	4.90129e-05	0.332414	0.057071	0.0073732
LOC105242493	Q3U0V2	0.0138729	0.545247	0.138878	0.461903
Tardbp	Q921F2	5.39365e-08	0.330552	-0.243871	0.0694681
Vps51	Q3UVL4	0.576285	-0.0833476	-0.221095	0.745238
Pspc1	Q8R326-2	3.93174e-05	0.544231	-0.183075	0.301353
Sart1	Q9Z315	2.06015e-05	0.540142	0.176428	0.205695
Raly	Q64012-2	0.42604	0.0334419	-0.217572	0.21882
Fus	G3UXT7	0.625795	0.0358446	-0.217071	0.443436
Pbdc1	Q9D0B6	0.0705402	-0.159654	-0.214589	0.225307
Eif3g	Q9Z1D1	0.000143723	0.32711	-0.193768	0.081265
Bud31	E0CX20	0.00358688	0.326033	-0.443896	0.0508629
Ddx19a	Q61655	0.000235022	0.325486	-0.193285	0.0583316
Rpl24	Q8BP67	2.72766e-07	0.536714	0.0838639	0.201168
Pus7	Q91VU7	0.556915	0.146653	-0.212662	0.544573
Pxn	F8VQ28	0.0216459	0.321746	0.335672	0.153009
Nop56	Q9D6Z1	6.43231e-05	0.32165	-0.0658575	0.129139
Rpl21	Q9CQM8	2.62618e-05	0.533711	0.0369826	0.612406
Upf2	A2AT37	0.0289335	0.53125	0.0339411	0.899256
Smarcc2	Q3UID0	0.401923	0.0754805	-0.212014	0.267422
Mphosph10	Q810V0	5.95023e-07	0.526391	0.0927541	0.617177
Rpl30	P62889	9.81176e-07	0.524911	0.136278	0.4454
Eif3f	Q9DCH4	1.27477e-07	0.521851	-0.107742	0.679443
Nop16	Q9CPT5	0.81248	-0.0268959	-0.208782	0.260333
Nip7	Q9CXK8	5.2487e-06	0.519698	-0.181563	0.278136
Rbm26	E9Q640	0.95227	-0.0100512	-0.208536	0.293875
Zc3h11a	Q6NZF1	0.000933237	0.31355	-0.507711	0.0492509
Acaca	Q5SWU9	0.123082	0.181231	-0.207224	0.290533
Dhodh	O35435	0.918269	0.0109395	-0.207035	0.494788
Ahcyl2	H3BKT5	0.606319	0.128578	-0.206092	0.389456
Ppfia1	B2RXW8	0.0170882	0.513027	-0.545709	0.273563
Atp5l	Q9CPQ8	0.0611177	-0.10248	-0.205168	0.3451
Fmr1	E9QAT0	0.00369226	0.311264	-0.361204	0.19518
Shtn1	Q8K2Q9	8.27321e-06	0.512767	0.0914773	0.432129
Prpf3	Q922U1	0.0318452	0.308115	-0.403478	0.102299
Hnrnpa0	Q9CX86	0.000994692	0.307861	-0.338672	0.0548628
Fbxo22	Q78JE5	0.0927464	-0.70649	-0.204438	0.729077
Dhx9	E9QNN1	5.76293e-06	0.306407	-0.186623	0.0820187
Nsun2	Q1HFZ0	1.32281e-05	0.305432	-0.177828	0.0963545
Sec22b	O08547	0.000474423	0.302879	0.349463	0.0251207
Nars	Q8BP47	0.000110017	0.301634	0.127858	0.054876
Dhfr	P00375	0.704102	0.0109538	-0.203009	0.39432
Heatr3	Q8BQM4	3.9821e-05	0.509332	-0.356704	0.247169
Ddx56	Q9D0R4	0.00165628	0.300964	-0.365073	0.0855473
Srsf11	D3Z4B0	0.0122401	0.299589	-0.327693	0.0941023
Noc4l	Q8BHY2	0.00137683	0.508284	0.107842	0.624026
Ppih	Q4G0C5	0.123899	0.331182	-0.199957	0.628138
Cyc1	Q9D0M3-2	0.651386	-0.0260059	-0.199894	0.391477
Eif3c	Q8R1B4	0.000368056	0.298109	0.0978855	0.0226557
Trmt61a	Q80XC2	0.30346	-0.486299	-0.199853	0.428014
Lsm12	Q9D0R8	5.08526e-05	0.506315	0.0531832	0.739178
U2af2	P26369	0.0618671	-0.172574	-0.198682	0.252667
Cct6a	P80317	8.04485e-08	0.29411	0.0894909	0.104224
Ttc37	F8VPK0	0.18262	0.411566	-0.198398	0.521532
Ddx47	F6QKD2	5.87899e-06	0.504072	0.141719	0.666969
Hsph1	Q61699	2.17557e-09	0.503275	-0.0666137	0.55382
Srgap2	A0A087WNM1	0.0198987	0.288797	0.798721	0.133181
Exosc5	Q9CRA8	0.892661	-0.0210099	-0.196841	0.672486
Lhpp	Q9D7I5-2	0.027583	0.498672	-0.314542	0.451329
Kars	Q99MN1	0.00013626	0.286575	0.0881205	0.0460807
Gspt1	Q8R050-2	2.77587e-07	0.498437	0.0846497	0.242242
Sdhaf2	Q8C6I2	0.00405056	0.496895	0.225593	0.447729
Eftud2	A2AH85	1.35095e-05	0.280883	-0.193412	0.151948
Ak3	Q9WTP7	0.731001	-0.0454891	-0.193943	0.486932
Apmap	Q9D7N9	0.556591	-0.0859824	-0.193732	0.760094
Cwc22	B1AYU4	0.0221651	0.495469	-0.16509	0.493252
Aatf	Q9JKX4-3	5.69182e-06	0.495035	-0.0192818	0.961342
Snx9	Q91VH2	0.116093	-0.924891	-0.191758	0.59602
Specc1	Q5SXY1-2	0.0622536	-1.1514	-0.191705	0.509973
Raver1	Q9CW46	0.00362056	0.27507	0.775327	7.72255e-05
Mrto4	Q9D0I8	3.40117e-05	0.494558	-0.0963021	0.821978
Gm9774	A0A0A6YVU8	0.00173105	0.274497	-0.251631	0.118114
Prpf4b	Q61136	0.00629896	0.492377	0.555188	0.319141
Heatr1	G3X9B1	0.00210214	0.273583	-0.325082	0.0500285
Adprh	P54923	0.00669198	0.49033	-0.154869	0.65167
Srsf5	Q9D8S5	2.00053e-05	0.48921	0.0966153	0.554566
Hnrnpa3	A2AL12	0.000223708	0.270958	-0.164934	0.0736742
Tra2a	E9QP00	5.44304e-06	0.488825	0.056437	0.643354
Uba1	Q02053	5.64002e-07	0.270288	0.118654	0.0765393
Hsp90aa1	P07901	3.84093e-09	0.487573	0.0566608	0.512618
Tnpo3	Q6P2B1	0.071162	0.135374	-0.186349	0.572235
Camk2d	A0A0G2JDC1	0.00649988	0.269018	0.284376	0.0383831
Smarce1	O54941	0.00238369	0.268523	-0.424069	0.0417466
Ddx6	P54823	0.621528	-0.0380925	-0.186061	0.311318
Eef1b2	O70251	0.000140987	0.267632	-0.257522	0.0851841
Pwp1	Q99LL5	0.108623	-0.131182	-0.185729	0.485655
Ctage5	H3BJS5	0.212613	0.155514	-0.185326	0.698678
Vta1	Q9CR26	0.0153277	0.265989	0.237319	0.194053
Ctage5	H3BJ71	0.670472	0.155514	-0.185326	0.698678
Eif2b2	Q99LD9	0.309178	-0.100407	-0.185096	0.672913
Matr3	Q8K310	2.40784e-05	0.262973	-0.126142	0.16709
Atg3	Q9CPX6	0.145855	-0.285618	-0.184646	0.655517
Cct3	P80318	1.44553e-06	0.262687	0.0759327	0.160365
Uso1	Q9Z1Z0	0.000115395	0.262465	0.182141	0.0482798
Vps16	G3X8X7	0.0586077	-0.245122	-0.184476	0.416797
Wdr43	Q6ZQL4	5.31863e-05	0.484216	-0.162944	0.353878
Arhgef2	H3BJU7	2.70049e-06	0.483915	0.120361	0.287347
Lmnb2	P21619	0.00189273	0.478839	-0.00954976	0.908535
Supt6	Q62383	0.0108962	0.478443	-0.0152633	0.959824
Sec13	Q9D1M0	0.00035774	0.257196	0.236343	0.0596556
Actb	P60710	2.27208e-05	0.477795	0.0417678	0.32684
Ncl	P09405	1.91932e-08	0.474588	-0.12324	0.302084
Utp3	Q9JI13	2.31059e-05	0.470698	-0.213979	0.293355
Bop1	P97452	1.92674e-05	0.469682	-0.0823719	0.596746
Ktn1	A0A087WNW3	0.00314619	0.465279	0.00708399	0.959612
Hnrnpu	G3XA10	1.36335e-05	0.254089	-0.173354	0.0284214
Lyn	P25911-2	1.09467e-06	0.463088	-0.28725	0.51773
Nap1l4	Q78ZA7	0.00589674	0.253379	0.1538	0.188217
Nop58	Q6DFW4	7.99699e-06	0.461514	-0.0973051	0.411251
Bysl	O54825	0.00878983	0.253052	-0.273373	0.190951
Gak	Q99KY4-2	0.0626167	-1.09332	-0.181329	0.839091
Ndufa7	Q9Z1P6	0.0592409	-0.954647	-0.181031	0.227205
Akr1a1	Q9JII6	1.423e-05	0.251847	0.385062	0.0064992
Cpsf2	O35218	0.0430885	0.460698	-0.0543738	0.858993
Lpxn	Q99N69	0.000165447	0.250963	-0.545007	0.000732306
Sec24b	Q80ZX0	0.000928083	0.460595	-0.0921153	0.551452
Elavl1	P70372	0.0561275	0.185334	-0.179338	0.476614
Atp5d	Q9D3D9	0.000106643	0.458313	0.006187	0.966505
Nup88	Q8CEC0-3	0.000730076	0.455284	0.0189546	0.926528
Srp68	Q8BMA6	0.00030717	0.24719	0.243519	0.175832
Samm50	Q8BGH2	0.211477	-0.0968782	-0.178629	0.571176
Ppp2r4	P58389	0.610981	0.0268348	-0.178158	0.436282
Arhgef7	Q9ES28-4	0.223292	-0.117814	-0.177819	0.279874
Nol10	Q5RJG1	0.000229505	0.450292	0.213094	0.274974
Rpa2	Q3TE40	0.0018386	0.242228	-0.581569	0.0740033
Tln1	P26039	3.9034e-05	0.242207	-0.110077	0.073566
Anxa7	Q07076	4.24609e-05	0.242196	0.313026	0.0467397
Rbm25	B2RY56	4.93613e-06	0.44711	0.159576	0.491513
Rbbp7	Q60973	6.27063e-05	0.240578	-0.341843	0.0225434
Emc2	Q9CRD2	0.00230015	0.445705	-0.29968	0.33058
Pnn	Q3TUQ5	0.114577	0.244894	-0.176757	0.481757
Fam96b	Q9D187	0.290234	-0.0865991	-0.176738	0.65983
Rpl9	P51410	0.00251973	0.238522	-0.090374	0.174889
Bzw1	A0A087WQS2	3.83714e-05	0.238381	-0.140255	0.193739
Phpt1	Q9DAK9	0.0272499	0.237861	0.294252	0.0120035
Myl6	Q60605-2	0.000507292	0.236102	0.266803	0.0312218
Erlin2	Q8BFZ9	0.907616	0.0087561	-0.17666	0.21864
Snrnp40	Q6PE01	0.00761529	0.234751	0.200653	0.183169
Stk3	Q9JI10-2	0.000531902	0.445141	0.235899	0.234453
Mrpl48	E9QPQ8	0.0957528	-0.474824	-0.175314	0.800704
Rpl36a	P83882	0.0101951	0.234215	0.168338	0.158825
Pold3	Q8BH76	0.146353	-0.815292	-0.175288	0.627209
Scfd1	Q8BRF7	0.000114271	0.443628	0.0113034	0.916496
Actr1b	Q8R5C5	0.999611	3.11553e-05	-0.175125	0.461665
Tmed10	Q9D1D4	0.00144049	0.232054	0.160679	0.189131
Psmc2	P46471	2.33078e-05	0.231701	0.121607	0.151114
Sec23b	Q9D662	0.013027	0.23006	0.317757	0.0122168
Larp1	Z4YJT3	0.000691985	0.443061	-0.0822289	0.608485
Cpt2	P52825	0.937595	0.0549452	-0.173571	0.257474
Atic	Q9CWJ9	5.06365e-06	0.228848	-0.0764115	0.117009
Ftsj3	Q9DBE9	0.000629031	0.442734	-0.133515	0.285056
Atp2a2	J3KMM5	3.89445e-05	0.227239	0.0640079	0.165433
Rpl22l1	Q9D7S7-2	0.022649	0.22606	-0.288804	0.155453
Nckap1l	Q8K1X4	0.243043	-0.0981209	-0.172733	0.225306
Ssb	P32067	0.00359656	0.225406	-0.231888	0.0813329
Hspa9	P38647	1.08772e-06	0.225227	0.101662	0.192805
Prdx5	P99029-2	0.000258231	0.225036	0.775369	0.0174399
Rpl36	Q6ZWZ4	0.0305589	0.439095	0.0868334	0.583314
Pak1ip1	Q9DCE5	0.000321949	0.439054	-0.333222	0.265049
Vps26b	Q8C0E2	0.389521	-0.403651	-0.172338	0.229337
Ctss	F6WR04	0.0104165	0.222866	0.638856	0.00573677
Smc2	Q8CG48	0.00635026	0.222396	-0.222418	0.171991
Farsb	Q9WUA2	0.00203527	0.221685	-0.147282	0.0703579
Erh	P84089	0.443166	0.0596168	-0.172336	0.286953
Upf1	Q9EPU0-2	0.00147707	0.219959	-0.280487	0.0198976
Ufc1	Q9CR09	0.561647	-0.292933	-0.17021	0.658274
Kpna2	P52293	0.00952335	0.21801	-0.573896	0.0180488
ND5	P03921	0.513755	-0.335619	-0.170043	0.711231
Rpl10a	Q5XJF6	0.000336341	0.21772	0.0839188	0.0919857
Tmx2	D3Z2J6	0.54237	-0.174516	-0.169508	0.48951
Rprd1b	Q9CSU0	0.746651	-0.0388795	-0.169453	0.406422
Srsf6	Q3TWW8	3.31364e-05	0.21299	-0.168639	0.00184202
Mat2a	Q3THS6	5.17849e-05	0.437408	-0.117871	0.377455
Hnrnpa1	Q5EBP8	4.25295e-06	0.434796	-0.394125	0.212492
Nup50	Q9JIH2	0.000287646	0.434145	-0.222483	0.292424
Eif3i	Q9QZD9	7.6709e-07	0.433582	0.0542895	0.596456
Knop1	E9QKQ3	0.0652556	0.888775	-0.167677	0.740979
Faf2	Q3TDN2	0.0012903	0.433415	0.0713886	0.762635
Bola2	Q8BGS2	8.22866e-05	0.432954	-0.0583903	0.695427
Ogfr	Q99PG2-2	0.000830746	0.430681	0.186764	0.312966
Tor1aip1	Q921T2-3	0.000876061	0.428969	0.0652254	0.607175
Vps4b	P46467	0.00112166	0.206046	-0.142163	0.00941168
Myo1e	E9Q634	0.00580838	0.205926	-0.91412	0.0803047
Smc4	E9Q2X6	0.0483215	0.205689	-0.349384	0.12888
Ddx3y	Q62095	2.81281e-06	0.428173	-0.15841	0.316431
LOC102641436	P59325	0.00571532	0.204809	0.266541	0.000718687
Hspa8	P63017	4.36911e-08	0.42099	0.0479778	0.288659
Bub3	Q9WVA3	0.000522462	0.202817	-0.461807	0.0312152
Ncln	D3YU17	0.759095	0.0358378	-0.164349	0.474432
Nedd8	P29595	0.866521	-0.0266202	-0.164228	0.334719
Ranbp2	Q9ERU9	2.44236e-05	0.420622	-0.0191293	0.851246
Hsbp1	Q9CQZ1	0.0832069	-0.955821	-0.163076	0.734669
Tsg101	Q61187	0.045096	0.200566	-0.316943	0.0962398
Rpl13a	P19253	0.428333	-0.0691875	-0.16295	0.22318
Pcbp2	Q61990	9.98537e-06	0.419953	-0.0361822	0.459661
Pcbp2	Q61990-2	0.00847004	0.419953	-0.0361822	0.459661
Acsl4	Q9QUJ7-2	6.88497e-05	0.196021	0.245802	0.121865
Arf6	P62331	0.176138	0.281224	-0.162208	0.521596
Eif3k	Q9DBZ5	0.00966298	0.195053	-0.14577	0.145189
Wasf2	Q8BH43	0.0513476	-0.163562	-0.162026	0.545033
Srrm2	Q8BTI8-3	6.26238e-09	0.419718	0.0425277	0.619688
Eif2a	Q8BJW6	3.16281e-07	0.419531	-0.0481916	0.527768
Psmd11	Q8BG32	4.40377e-05	0.192999	0.124555	0.102757
Lig3	Q3UC82	0.000670288	0.417647	-0.2049	0.665121
Gpd2	Q64521	0.0013341	0.192479	0.747656	0.00957306
Wdr12	Q9JJA4	8.76588e-05	0.416936	-0.180589	0.215761
Arcn1	Q5XJY5	8.71276e-07	0.415812	0.0140137	0.802833
Plec	Q9QXS1-15	0.000592352	0.192329	0.0126311	0.0842171
Mrpl27	Q99N92	0.504248	-0.11247	-0.159874	0.277241
Hsp90b1	P08113	9.14836e-06	0.190776	0.116673	0.167068
Rrp1	P56183-2	0.014547	0.190677	-0.878269	0.0137063
Celf1	P28659-2	0.00673579	0.190143	-0.112526	0.140158
Galnt7	Q80VA0-2	0.533765	0.134003	-0.159853	0.625399
Bcas2	Q9D287	0.197569	0.191317	-0.159752	0.519067
Uba2	Q9Z1F9	0.00182876	0.188522	-0.145817	0.113484
Abcf1	Q6P542	1.71483e-05	0.413946	-0.00339892	0.956437
Cdc5l	Q6A068	0.00234759	0.188425	-0.353379	0.0957224
Zc3h14	Q8BJ05-2	0.894074	-0.0492921	-0.159392	0.556598
Ybx1	P62960	0.245082	-0.0578055	-0.159149	0.461042
Tubb4b	P68372	6.73195e-05	0.410943	-0.0307395	0.65454
LOC102642938	O88569	1.00544e-07	0.185986	-0.194209	0.155857
Btf3	Q64152-2	0.931974	0.0110937	-0.158527	0.28712
Tpr	Q7M739	0.000157331	0.404034	-0.0125801	0.737261
Impdh2	P24547	7.99236e-07	0.400615	-0.119066	0.212274
Flna	B7FAU9	7.33513e-06	0.399659	0.0648849	0.257389
Dhx15	O35286	1.75487e-06	0.397803	-0.0706761	0.617923
Tmod3	Q9JHJ0	0.0107123	0.176312	-0.208176	0.152189
Golga2	Z4YJU8	0.272689	-0.122057	-0.155899	0.344485
Rpl19	A2A547	0.000607755	0.397509	0.127587	0.296057
Snrnp200	Q6P4T2	0.000684484	0.174831	-0.738489	0.00848446
Ywhag	P61982	2.416e-06	0.396224	0.0778945	0.240853
Rab35	Q6PHN9	0.0168369	0.395616	0.240254	0.359112
E430025E21Rik	Q8C2E7	0.0964095	-0.44669	-0.153241	0.772293
Timm50	Q9D880	0.654568	0.0344895	-0.152807	0.517025
Impdh1	F7DEU6	0.000126055	0.394738	-0.107888	0.808123
Uhrf1	Q8VDF2-2	0.0536991	-1.203	-0.152097	0.600482
Rps6ka1	G3UZI3	0.805698	0.0910265	-0.150934	0.536138
Gsk3a	D3Z7E5	0.310872	0.303019	-0.15083	0.603605
Gfm2	Q8C1C2	0.0902082	-0.424252	-0.150025	0.267973
Cops6	D3Z0F5	0.608603	-0.0355312	-0.149956	0.684675
Rps15a	P62245	0.748028	-0.0269957	-0.149003	0.40755
Nap1l1	E9PW66	7.05252e-05	0.393634	-0.101534	0.486492
Surf6	P70279	0.00171754	0.39242	-0.0663954	0.583318
Wdr61	Q9ERF3	0.630341	0.0599622	-0.148424	0.426656
Vps11	Q91W86	0.742595	-0.0624751	-0.147748	0.398499
Pdlim5	Q8CI51	0.16078	-0.0952376	-0.147186	0.497515
Preb	Q9WUQ2	0.0420697	0.389187	-0.0152438	0.952749
Pgam1	Q9DBJ1	0.000202037	0.38637	-0.0214969	0.631417
Sptlc2	P97363	0.545544	0.0789011	-0.146307	0.520544
Esyt1	Q3U7R1	6.45855e-05	0.157209	0.300008	0.0888627
Ptbp1	Q8BGJ5	1.13824e-05	0.155954	-0.247956	0.175641
Ncoa5	Q91W39	0.104446	0.393694	-0.146008	0.282906
Hint1	P70349	2.09677e-05	0.384807	-0.113037	0.400287
Glud1	P26443	0.00445865	0.155108	-0.122637	0.0349159
Nudt21	Q9CQF3	0.0808078	-0.135302	-0.145163	0.653462
Rab1b	Q9D1G1	0.0390863	0.383989	0.0894568	0.49328
Rpn1	Q91YQ5	0.00259198	0.15243	0.147085	0.0950986
Mars	E9QB02	0.0039923	0.151917	-0.172474	0.0228787
Atp5c1	Q8C2Q8	0.000115113	0.151808	-0.171439	0.168858
Rpl12	P35979	0.00538567	0.151719	-0.27639	0.0230345
Xrn2	Q9DBR1-2	0.00985957	0.149724	-0.208579	0.0201935
Ccdc47	Q9D024-2	0.732368	-0.0380932	-0.144292	0.412043
Rap1b	Q99JI6	0.0338042	0.149224	0.439539	0.0806908
Dctn1	E9Q586	0.497531	-0.0697406	-0.143993	0.369928
Map4k4	B7ZNR9	0.662615	0.116915	-0.143961	0.799843
Sphk2	Q9JIA7	0.725496	0.138321	-0.143584	0.417487
Aim2	Q91VJ1	0.101735	-0.194818	-0.143541	0.720785
Ctsl	P06797	0.0646256	-0.906113	-0.143245	0.245
Rps29	P62274	0.303431	-0.157857	-0.143155	0.506221
Myo18a	E9Q405	0.0388726	0.380647	0.121849	0.72416
Khdrbs1	Q60749	0.000289901	0.380012	0.00321749	0.98845
Dpm1	O70152	0.0984979	-0.320696	-0.142471	0.453724
Rpl7a	P12970	0.00315413	0.13411	0.0763606	0.0862781
Pdia3	P27773	5.89153e-06	0.134047	0.181032	0.11447
Usp4	A0A0A6YW28	0.000260371	0.379872	-0.046013	0.850722
Cse1l	Q9ERK4	0.0218778	0.130945	-0.189005	0.0996486
Dync1i2	A2BFF8	0.049232	0.130661	0.272554	0.084002
Emd	O08579	0.00912188	0.377055	0.167564	0.52107
Eef2	P58252	3.27254e-09	0.374957	-0.00334684	0.960908
Cyb5r3	F2Z456	0.0386814	0.128071	0.365106	0.00467212
Ppia	P17742	0.0009724	0.127259	-0.124093	0.0930434
Utp6	Q8VCY6	0.00320162	0.37452	-0.42653	0.230777
Gart	Q64737	2.51106e-07	0.373892	0.0400841	0.513623
Ckap5	Z4YL78	0.0016169	0.369833	-0.027182	0.892671
Ptbp3	G8JL74	0.0254787	0.121451	0.343458	0.193657
Gipc2	Q9Z2H7	0.02133	0.369731	0.511774	0.36752
Copg1	Q9QZE5	7.89669e-07	0.365785	-0.0196681	0.81193
Uba6	D3Z061	0.0713856	0.178978	-0.139156	0.535297
Dis3	Q9CSH3	0.000492598	0.365167	0.240887	0.653897
Papola	E9QAY4	0.95694	-0.0394509	-0.13897	0.687151
Cybb	Q61093	0.00986398	0.110234	1.57713	0.00493863
Rhog	P84096	0.00768652	0.109701	0.465008	0.0178125
Snrnp70	Q62376	0.0156366	0.106679	-0.262587	0.000206813
H2	P50171	0.0228568	0.105957	0.64749	0.00346803
Syncrip	G3UZI2	0.0120595	0.105391	-0.217156	0.0922828
Ube2q1	Q7TSS2	2.10962e-05	0.364074	0.278849	0.351396
Hyou1	Q9JKR6	0.00762321	0.102248	0.317497	0.00573122
Mpp1	P70290	0.023867	0.0989063	0.229502	0.126473
Kif5b	Q61768	0.0245815	0.0979375	0.228109	0.0172202
Gys1	D3Z0Q6	0.618074	0.137552	-0.138208	0.745583
Pnpt1	Q8K1R3	0.00015009	0.359045	-0.136114	0.285739
LOC102641347	Q9CQ54	0.904892	-0.0528292	-0.137299	0.212558
Psmc1	P62192	0.0479105	0.0921749	0.197159	0.0957918
Ahsa1	Q8BK64	6.07173e-07	0.358977	-0.139795	0.562409
Eef1d	Q80T06	0.0604112	0.107999	-0.137027	0.482631
Eef1d	P57776-2	0.102193	0.107999	-0.137027	0.482631
Hnrnpl	G5E924	0.0243543	0.0814227	-0.183072	0.0600929
Aacs	Q9D2R0	0.399033	0.0987875	-0.137025	0.514932
Hnrnpc	Q9Z204	3.19134e-07	0.358799	-0.179268	0.285501
Calu	Q6XLQ8	0.00134738	0.007807	0.285501	0.0575339
Pelo	Q80X73	0.610964	0.13664	-0.13512	0.552372
Parp1	Q921K2	0.044153	-0.0675868	-0.183283	0.0647609
Psmc3	O88685	2.34829e-06	0.358118	0.0379929	0.602454
Snx5	Q9D8U8	0.0298673	-0.0849342	-0.304708	0.00359897
Trim28	Q62318	0.0277842	-0.0973552	-0.173622	0.0200964
LOC102641809	P18608	0.50706	-0.144782	-0.134653	0.469532
Acsl3	E9PUC2	0.00635701	0.357508	-0.0898983	0.78136
Mtch2	Q791V5	0.0122977	-0.114623	-0.171492	0.0245515
Pip4k2c	Q91XU3	0.0934124	0.792362	-0.133908	0.600695
Ppan	Q91YU8	0.0084021	0.357244	-0.114264	0.492616
Tomm70a	Q9CZW5	6.29466e-06	0.352152	0.0666876	0.544853
Emg1	O35130	7.82325e-05	0.351684	0.0916224	0.655759
Khsrp	Q3U0V1	0.00519604	-0.117657	-0.0986651	0.157735
Pop1	Q9D4G5	0.0382488	0.348311	-0.223628	0.31648
Slc1a5	Q9ESU7	0.00452659	0.346107	-0.138678	0.688573
Git1	Q5F258	0.908946	-0.0113167	-0.130139	0.360437
Nubp2	Q9R061	0.106064	0.22747	-0.129032	0.50554
Edc4	G5E896	0.00185193	0.3411	-0.182545	0.410096
Umps	P13439	9.96523e-05	0.340039	-0.0160035	0.910751
Ddx1	Q91VR5	2.27448e-07	0.339103	-0.0407172	0.74631
Dek	Q7TNV0	0.0592455	-0.0893027	-0.127123	0.39677
Bax	Q07813	0.0369147	-0.13771	0.381404	0.0489763
Snx2	Q9CWK8	0.0383314	-0.139017	-0.207224	0.0187636
LOC102641332	P62827	0.0173626	-0.140169	-0.0622762	0.0731889
Rcc2	Q8BK67	0.00239939	-0.140404	-0.301307	0.0134895
Ppm1f	Q8CGA0	0.0976281	-0.256904	-0.126872	0.64517
Mpp6	Q9JLB0-2	0.245448	-0.566447	-0.126827	0.708722
COX2	P00405	0.913834	0.00690713	-0.126729	0.445261
Slk	O54988-2	0.0898081	-0.0862862	-0.126456	0.231126
Hnrnph1	Q8C2Q7	1.21917e-05	0.338848	-0.130694	0.496217
Rpf2	Q9JJ80	0.0342631	0.338244	-0.0129423	0.928451
Sar1b	Q9CQC9	0.899476	0.0112746	-0.125734	0.590276
Atp5f1	Q9CQQ7	0.0221034	-0.150915	-0.224213	0.110317
Safb	S4R1M2	0.0520272	-0.210415	-0.125092	0.432871
Ano6	Q6P9J9	0.614082	0.2324	-0.124831	0.303579
Uqcrc1	Q9CZ13	0.354544	-0.0449934	-0.124331	0.240549
Tns3	Q5SSZ5	0.0374321	-0.155509	-0.584977	0.191684
Zranb2	D3Z4U0	0.0955042	-0.711541	-0.124047	0.360889
Abhd11	Q8K4F5	0.735194	0.192155	-0.123849	0.863156
Srsf1	H7BX95	0.000794381	0.338153	-0.160019	0.305695
Gapvd1	Q6PAR5-5	0.00572673	0.337649	3.16812e-05	0.999901
Tpm3	P21107-2	0.00021727	-0.159811	0.0902413	0.121565
Morc3	F7BJB9	0.0196416	0.33599	-0.603462	0.20655
Npm3	Q9CPP0	0.00131123	0.335423	-0.257672	0.417043
Tigar	Q8BZA9	0.00168985	0.333003	-0.0060391	0.942337
Cenpv	Q9CXS4	0.0428936	-0.162445	0.335816	0.187217
Prps1l3	G3UXL2	0.00325497	-0.162592	-0.147186	0.00920159
Ddx18	Q8K363	0.0345314	0.331327	-0.0488853	0.769295
Rps10	P63325	0.0141589	-0.163386	-0.195581	0.0632266
Akap8	Q9DBR0	0.413724	0.141951	-0.11971	0.559253
Yme1l1	O88967	0.0429932	0.329547	-0.0580814	0.417841
Cd86	P42082-2	0.00460649	0.329459	-0.233185	0.328815
Alox5ap	P30355	0.612328	0.0438639	-0.118193	0.561907
Snx3	Q78ZM0	0.00872568	-0.172066	-0.419333	0.00199608
Ubap2	A2AMY5	0.0203777	0.32908	-0.158259	0.255963
Mapre1	Q61166	0.00181942	-0.175445	0.151588	0.187392
Smarcc1	Q3UNN4	0.032575	0.328141	-0.00348489	0.979345
Dpf2	D3Z5N6	0.352559	0.241273	-0.118082	0.486102
Gigyf2	G3UYG6	0.41653	0.203737	-0.118007	0.445201
Ctsd	P18242	0.0117221	-0.179626	0.539962	0.00792875
Cct2	P80314	9.47794e-08	0.327888	0.0172859	0.433144
Ttc1	Q91Z38	0.0740116	-1.5275	-0.117387	0.482369
Wdr3	Q8BHB4	0.000652126	0.327765	-0.141822	0.413288
Smc1a	Q9CU62	0.00452014	0.323763	-0.0777845	0.535905
Ddi2	A2ADY9	0.00854192	-0.188267	-0.323858	0.0546451
Dstn	Q9R0P5	0.0192862	-0.19024	0.239229	0.166542
Pcbp1	P60335	7.6677e-06	0.322846	0.125326	0.365832
Eif3b	Q8JZQ9	4.55195e-05	0.320598	-0.0115144	0.911478
Nup43	P59235	2.12482e-05	0.320316	-0.119922	0.596808
Eif4g1	E9Q9E1	1.54442e-05	0.319599	-0.0384457	0.571183
Suclg1	Q9WUM5	0.00643546	-0.194551	-0.24881	0.0299191
Rab5c	P35278	0.0282302	-0.194901	0.23249	0.0896707
Larp4b	Q6A0A2-3	0.0912006	0.233314	-0.114469	0.389679
Rab7	P51150	0.0834813	-0.0851493	-0.114293	0.229087
Gtf2f2	Q8R0A0	0.257483	0.153749	-0.114287	0.532632
Qars	Q8BML9	0.000213731	0.319002	-0.0415512	0.490073
Sssca1	P56873	0.0178448	0.317322	-0.0361045	0.790173
Vdac3	J3QMG3	0.0419723	-0.20463	0.187485	0.188078
Apex1	P28352	0.00396133	-0.204633	-0.110681	0.00870893
Lsm4	Q9CY46	0.711503	-0.0379791	-0.113395	0.502207
Tpi1	P17751	0.0010201	-0.205475	-0.145869	0.141274
Fermt3	Q8K1B8	0.00846323	-0.205719	-0.131944	0.179867
Senp3	Q9EP97	0.0475374	0.317013	-0.068948	0.74314
Srp54a	P14576	0.00107733	0.316637	-0.0321556	0.831963
Vapb	Q8BH80	0.0162259	-0.20781	0.181843	0.159094
Tars2	Q3UQ84	0.0511352	-0.44039	-0.112422	0.411914
Suclg2	Q9Z2I8-2	0.472871	-0.0634925	-0.112248	0.252853
Fip1l1	D3Z619	0.00192303	0.316244	-0.0928581	0.745774
Ralb	Q9JIW9	1.30398e-05	0.315194	0.164391	0.331613
Macf1	F7ACR9	0.00798367	-0.210918	-0.164786	0.180477
Saal1	Q9D2C2-2	0.252343	-0.257807	-0.112151	0.866538
Dnajc3	Q91YW3	0.000220814	0.313332	0.217467	0.313274
Fam160b1	Q8CDM8-2	0.371835	-0.397323	-0.111506	0.804383
Mcm5	Q52KC3	0.00141025	-0.212754	-0.218266	0.0571924
Swap70	Q6A028	0.00103549	0.312772	0.226478	0.277544
Gcn1l1	E9PVA8	0.148944	0.0840006	-0.110815	0.278343
Txndc5	E9PXX7	0.663454	0.0205314	-0.110495	0.244076
Dnajc11	Q5U458	0.112573	0.145889	-0.109906	0.79341
Fubp1	Q3TUE1	0.000661741	-0.219456	-0.342715	0.114039
Psmd2	Q8VDM4	3.15259e-07	0.312614	0.00143505	0.982918
Top1	Q04750	0.000225289	0.31216	-0.0555676	0.26002
Csnk2b	P67871	0.0615265	0.259057	-0.107886	0.356629
Gtf2e2	Q9D902	0.00960171	0.311622	0.0350217	0.795992
Pls3	B1AX58	0.00134216	0.308254	0.258885	0.332825
Cct5	P80316	1.27893e-05	0.306519	-0.00486633	0.930117
Arpc5	Q9CPW4	0.00125947	-0.226552	0.154059	0.0225768
Asl	E0CY49	0.235957	-1.19278	-0.107156	0.35761
Ccdc93	E9QAD4	0.0736958	1.21848	-0.107126	0.658792
Erp44	Q9D1Q6	0.00505321	-0.230324	0.420974	0.00232035
Cct7	P80313	2.92386e-06	0.301503	0.0296604	0.709129
Prpf31	Q8CCF0-3	0.00614807	0.301008	0.0962003	0.42183
Exosc6	Q8BTW3	0.108869	-0.214974	-0.106437	0.783868
Psmc5	P62196	3.00928e-05	0.2994	-0.0665627	0.486521
U2af1	Q9D883	0.0779952	0.12494	-0.10516	0.368216
Pck2	Q8BH04	0.000790191	-0.236156	0.177105	0.00875896
Snx6	Q6P8X1	0.00193396	0.298764	0.0331277	0.786995
Tex10	Q3URQ0	0.0877965	-0.282548	-0.104187	0.916118
Wars	P32921-2	0.0101444	-0.238422	0.240495	0.0639403
Iars2	Q8BIJ6	0.395915	-0.0960402	-0.104124	0.552087
Pitrm1	Q8K411-2	0.000386137	-0.239866	0.0664558	0.103276
Mcm7	Q61881	8.23512e-05	-0.239989	-0.173305	0.11408
Gpi1	P06745	0.0238095	-0.240371	-0.152266	0.0175714
Mvp	E9Q3X0	0.000167102	-0.241215	0.326501	0.00244711
Prpf19	Q99KP6	0.000153513	0.298365	-0.117027	0.303133
Ppid	Q9CR16	1.43579e-06	0.296844	0.0919632	0.310261
Cops8	Q8VBV7	0.569844	0.0303973	-0.103175	0.697484
Galk2	Q68FH4	0.0127416	-0.242797	-0.206153	0.169809
Galk1	Q9R0N0	0.12694	0.24652	-0.10304	0.47754
Vps33a	Q9D2N9	0.33453	-0.156723	-0.103031	0.850381
Myof	E9Q390	0.00842504	-0.245132	0.312537	0.0147592
Ampd2	A2AE27	0.182726	-0.293048	-0.103016	0.329028
Gar1	D3YZ09	0.0143212	0.296018	0.0254806	0.88673
Ubr4	A2AN08-3	0.0438375	0.295641	0.395672	0.207564
Tuba1b	P05213	1.06699e-05	0.293076	0.073864	0.31907
Epb41l2	O70318	0.0068128	-0.253055	-0.21223	0.0373803
Vamp8	O70404	0.0988742	0.113599	-0.101292	0.546121
Maoa	Q64133	0.0116231	-0.25395	0.427824	0.0140285
Ccar1	Q8CH18	0.981443	0.00235094	-0.101226	0.284106
Ccdc22	Q9JIG7	0.674137	0.03065	-0.101194	0.581629
Ebna1bp2	Q9D903	0.641549	0.0581087	-0.100897	0.263469
Rpl35a	O55142	0.0111303	0.292302	0.0271941	0.809132
Sgpl1	Q8R0X7	0.00069727	-0.260217	0.308693	0.0634182
Clint1	Q5SUH7	0.0342556	-0.261585	-0.288203	0.103715
Snrpg	P62309	0.166403	0.504304	-0.0984307	0.570732
Ctps	P70698	0.000121882	0.292043	-0.0221177	0.758024
Prmt1	D3Z0A2	0.47285	-0.0538057	-0.0978706	0.620475
Ddx27	Q921N6	0.00103038	0.288494	-0.197253	0.280875
Uqcrq	Q9CQ69	0.0363291	-0.266976	0.215142	0.170579
Rbm17	Q8JZX4	0.0244527	0.287371	-0.0258008	0.885572
Rpl8	P62918	0.000101393	0.284254	0.0479684	0.680754
Hnrnpul1	Q8VDM6-2	0.332928	-0.0384021	-0.0972397	0.37057
Reep5	G3X8R0	0.0298571	-0.269563	0.244454	0.0900531
Nt5c2	G3X9J6	0.459024	-0.0726344	-0.0971385	0.60749
Bsg	J3QP71	0.127937	0.267404	-0.0968601	0.404995
Rps2	P25444	0.000686348	-0.273335	0.186006	0.159942
Eif2s2	Q99L45	4.02932e-05	0.283665	0.0746684	0.518761
Gm20425	E9Q035	0.00605395	0.280718	0.0411433	0.84168
Dpy30	Q99LT0	0.226332	-0.273473	-0.0962002	0.68697
Edc3	Q8K2D3	0.00340135	0.279498	-0.0447607	0.917518
Coro1a	O89053	1.24226e-05	0.278293	-0.128274	0.423311
Polr1e	G8JL51	0.392332	0.35153	-0.0942081	0.826911
Mki67	E9PVX6	0.000221982	-0.277695	-0.323504	0.177679
Pla2g4a	P47713	0.920403	-0.00600553	-0.0934135	0.466612
Canx	P35564	0.833292	-0.0121832	-0.093399	0.520501
Nup98	Q6PFD9	8.73177e-05	0.276396	-0.0206837	0.93732
Ctnnd1	G3X9V2	7.75343e-05	0.27621	0.0509635	0.857633
Pqbp1	Q91VJ5	0.302509	-0.109081	-0.0928833	0.660342
Sec11a	D3YWT0	0.0490778	0.275919	0.00191399	0.987738
Prpf4	Q9DAW6	0.0204764	0.27497	-0.12378	0.447311
Arfip1	A2RSX9	0.177713	0.259063	-0.0924366	0.738222
Mrps11	Q3U8Y1	0.0369066	-0.280838	-0.4191	0.194919
Vapa	Q9WV55	0.0181473	0.274287	0.133157	0.216271
Rae1	Q8C570	6.80431e-05	0.271649	-0.075766	0.692004
Lars	Q8BMJ2	2.73248e-08	0.271304	0.0582779	0.321137
Glrx3	Q9CQM9	0.143569	0.0907202	-0.0903159	0.534209
Srsf9	Q9D0B0	0.00158174	0.27085	-0.322915	0.264054
Mtx1	G3XA66	0.789951	-0.031183	-0.0890547	0.728097
Drg1	P32233	0.10488	0.115772	-0.0889408	0.568774
Map2k1	P31938	0.00106545	0.26973	0.0703172	0.600183
Ap3d1	O54774	0.0643594	0.22986	-0.08796	0.289976
Pole3	Q9JKP7	0.00578365	-0.292846	-0.3222	0.126711
Hmgn2	A3KGL9	0.23528	1.19961	-0.0879132	0.710735
Ranbp1	P34022	1.70444e-05	0.269723	0.0421746	0.501998
Gm9825	J3QK23	0.00658548	0.268183	-0.372024	0.240793
Alyref	O08583	0.0472915	-0.296505	-0.366548	0.00828854
Psmd8	Q9CPS5	0.123934	-0.175359	-0.0870282	0.849926
Mrps9	Q9D7N3	0.0338506	-0.298218	-0.747542	0.186999
Rps15	P62843	0.147728	0.00349903	-0.0868517	0.377629
Rps15	D3YTQ9	0.993916	0.00349903	-0.0868517	0.377629
Atp6v0a1	K3W4T3	0.000273159	-0.300288	-0.253425	0.101795
Adk	P55264	7.6808e-05	-0.300552	-0.167295	0.0468303
Wdr74	Q8VCG3	0.405826	0.428415	-0.0866285	0.728651
Coro1c	Q9WUM4	0.261494	-0.0410073	-0.0864751	0.250203
Prdx1	P35700	0.000136956	-0.307043	1.16787	0.0005753
Rpl26	P61255	0.000372715	0.267576	-0.0331919	0.427887
Dap3	G3X9M0	0.0236603	-0.307684	-0.770148	0.0128562
Srrm1	A2A8V8	0.463442	-0.0893876	-0.0855757	0.622217
Soat1	Q61263	0.000339882	-0.308654	-0.291185	0.0356699
Ybx3	Q9JKB3	0.00378636	-0.309595	-0.312593	0.0263089
Atp5j	P97450	0.00391327	-0.312399	-0.441173	0.0883529
Prps2	Q9CS42	0.00845286	-0.312603	-0.244874	0.0493851
Bms1	Q6PGF5	0.0215893	0.266659	-0.101341	0.685453
Timm9	Q9WV98	0.0056537	-0.313557	0.176347	0.0987404
Thoc5	Q8BKT7	0.218881	0.221707	-0.0854367	0.758057
Rap1a	P62835	0.00123075	-0.316051	0.0850381	0.185062
Clptm1	Q8VBZ3	0.154658	-0.558341	-0.0846159	0.43738
Dnmt1	P13864	0.00032922	-0.318456	-0.259169	0.0757255
Psmg4	P0C7N9	0.00359872	0.265023	0.147268	0.669555
Hspa5	P20029	2.1798e-06	-0.320349	0.208513	0.0444428
Hmha1	G3X9Q3	0.00615052	-0.324904	-0.456737	0.0431613
Pabpn1	G3UY42	0.821909	0.0119969	-0.0842865	0.476051
Pdhx	Q8BKZ9	0.169368	-0.144978	-0.0840069	0.493309
Cog7	Q3UM29	0.0940529	-0.674259	-0.0839169	0.741993
Rab31	Q3TXV4	0.00227109	-0.328553	0.370719	0.0737395
Mut	P16332	0.0179518	-0.331068	-0.105199	0.00958691
Myo9b	E9QKV6	0.0136531	-0.333282	-0.310585	0.161876
Exosc8	F6SGT4	0.311994	-0.316365	-0.0832618	0.50895
Nup35	Q8R4R6	0.0112315	0.263716	-0.486973	0.241161
Rqcd1	Q9JKY0	0.497961	-0.425101	-0.0829483	0.877556
Eif3l	Q8QZY1	0.00394638	0.262819	-0.0173973	0.915772
Emc8	O70378	0.0234846	0.262427	-0.139756	0.733343
Fhl3	Q9R059	9.15205e-05	0.262343	-0.158967	0.512977
Cd2ap	Q9JLQ0	0.144155	-0.170234	-0.0820784	0.693224
Metap1	Q8BP48	0.00185234	0.262119	0.0869417	0.457647
Cnbp	P53996-2	0.000896445	-0.344775	-0.458588	0.020056
Ddx46	F8WHR6	0.000168264	0.261076	-0.0468912	0.691469
Son	H9KV00	0.00415295	0.257262	0.155577	0.593432
Ssrp1	A2AW05	0.00577573	0.256204	-0.159925	0.283771
Abr	E9PUE7	0.0251299	0.255944	0.0573304	0.681651
Ik	Q9Z1M8	0.000796234	0.255904	-0.0233051	0.902278
Psmc6	P62334	1.58305e-05	0.255303	0.00422396	0.91773
Cbx5	Q61686	0.00119447	-0.353687	-0.210115	0.0981666
Msto1	E9PUB7	0.0324999	0.254122	0.0836909	0.216495
Dnajc2	P54103	0.00469296	0.254035	0.0663189	0.709664
Cdk1	P11440	0.00257379	-0.355384	-0.350648	0.0149749
Itgb1	P09055	4.81938e-05	0.253064	0.177346	0.227335
Ubap2l	Q80X50-2	5.68014e-05	0.252532	0.0838313	0.212904
Dnajc13	G3X922	0.603602	-0.0619331	-0.0796968	0.597609
Ist1	Q9CX00	0.597075	0.0443582	-0.0795352	0.675668
Tbl3	Q8C4J7	0.000973097	0.251999	-0.00573063	0.962221
Pgpep1	Q9ESW8	0.0369436	-0.366271	-0.483125	0.0526575
Atp5b	P56480	0.000213019	0.251465	-0.0399864	0.498075
Rcc1	Q6PFB2	0.000110033	0.250669	0.0137108	0.933103
Copb1	Q9JIF7	0.000802314	0.250109	0.0105913	0.949054
M6pr	P24668	0.00217693	0.248443	0.112749	0.309851
Sugt1	Q9CX34	0.00139783	0.247761	-0.145728	0.407305
Hk1	P17710-3	0.000827251	-0.370784	0.181307	0.0141311
Napa	Q9DB05	1.07758e-05	0.24503	-0.142343	0.317488
Slc25a13	Q9QXX4	0.0592274	-0.177735	-0.0752041	0.598385
Faf1	P54731	0.141828	0.137123	-0.0751069	0.723723
Flii	Q9JJ28	0.0229194	0.244589	-0.118192	0.290183
Gnl3	Q8CI11	0.000992541	0.243664	0.0191664	0.92593
Aimp1	P31230	0.000285687	0.242273	-0.0593188	0.489851
Gpsm3	Q3U1Z5-2	0.0607968	-0.693866	-0.0725054	0.680656
Anp32b	Q9EST5	0.000271859	0.241156	-0.0878442	0.440973
Arrb2	Q91YI4	0.00121908	-0.382848	-0.508709	0.104149
Eef1g	Q9D8N0	0.3343	0.0485414	-0.0715668	0.331825
Eif3a	P23116	0.000654469	0.24019	0.0104679	0.83247
Srp19	Q9D104	0.000582315	0.240046	0.165721	0.650547
Ttll12	Q3UDE2	0.0277516	0.239159	-0.0587362	0.835479
Rexo4	A2ALB1	0.152055	0.784253	-0.0704681	0.843148
Ssr4	Q9D8L3	0.000770229	0.235859	0.0790812	0.389699
Ap3s1	Q9DCR2	0.0595913	0.308737	-0.0700347	0.828992
Bccip	Q9CWI3	0.109803	0.213098	-0.0700001	0.796412
Acat1	Q8QZT1	1.03239e-06	-0.396599	-0.235196	0.0153312
Anxa6	F8WIT2	3.84703e-06	-0.396903	-0.194602	0.0601886
Mapk14	P47811	0.038997	-0.397265	0.463969	0.0865186
Nans	Q99J77	0.00724167	0.234503	-0.182678	0.345708
Clic1	Q9Z1Q5	0.140215	-0.0942354	-0.0698397	0.34533
Sf1	E9Q4Q2	0.624749	0.0248482	-0.0697196	0.580099
Atad1	Q9D5T0	0.69708	0.0695275	-0.0696398	0.720895
Rbm14	Q8C2Q3	0.205428	0.0743597	-0.0695983	0.611842
Snrpd3	P62320	0.000330505	0.234412	0.0421539	0.691179
Cd68	P31996-2	2.93414e-08	-0.404619	-0.267472	0.095817
Gla	Q8BGZ6	0.000932714	-0.405206	0.167441	0.13482
Apobr	Q8VBT6	0.0110716	-0.406003	0.378507	0.113694
Serbp1	Q9CY58	3.55021e-05	-0.406243	-0.106432	0.169661
Supt16	G3X956	0.00417249	0.23286	-0.0238571	0.826361
Pdhb	Q9D051	0.963237	0.00193477	-0.0686962	0.435503
Lrrfip1	Q3UZ39	4.42625e-05	-0.407676	-0.273466	0.0242047
Psmd13	Q9WVJ2	0.59175	-0.0338113	-0.0672763	0.507282
Adrbk1	Q7TS64	0.0107029	-0.409557	0.372199	0.142839
Thrap3	Q569Z6	0.00436238	0.232519	-0.168444	0.385825
Pld4	Q8BG07-2	0.000117132	-0.409908	-0.21562	0.0124823
Nucb1	Q02819	1.859e-07	-0.411593	0.0978177	0.150855
Arl8a	F6QKK2	0.0143872	-0.413228	0.225223	0.0597902
Lrrc47	E9PV22	0.438033	-0.0572955	-0.0667598	0.452851
Lpl	P11152	0.0496822	0.232373	-0.103379	0.604048
Rab21	P35282	0.00587023	-0.415076	0.350059	0.111588
Parp3	Q8CFB8	0.0339083	0.22993	0.160414	0.389898
Csrp1	P97315	0.000154045	-0.416114	-0.287276	0.0302861
Nup93	Q8BJ71	1.18227e-05	0.229898	0.0122455	0.912689
Sdhb	Q9CQA3	1.38107e-06	-0.416528	-0.32113	0.00328037
Kpnb1	P70168	5.10276e-05	0.228375	-0.131061	0.244596
Chchd3	Q9CRB9	0.0153351	0.225693	0.142281	0.233047
Rassf2	Q8BMS9	0.00977176	-0.419835	-0.688653	0.00512081
Rps4x	P62702	0.00530304	0.224953	-0.0309336	0.574514
Bclaf1	F8WI22	0.000201325	0.223975	-0.102206	0.266365
Idh3g	P70404	4.83566e-05	-0.434364	-0.220025	0.00783024
Cstf2	A2AEK1	0.0033163	0.223761	-0.139092	0.676773
Tbc1d15	Q9CXF4	0.27855	-0.147975	-0.0652185	0.547005
Cdc37	Q61081	0.0585925	0.169968	-0.0652022	0.237901
Tm9sf3	Q9ET30	0.586711	-0.0254866	-0.0648095	0.71507
Srsf3	P84104-2	0.00114793	0.220176	0.00805546	0.949766
Psmd7	P26516	0.000645608	0.218896	0.161693	0.314697
Mrps26	Q80ZS3	0.940987	-0.00895991	-0.0646369	0.785901
Ipo7	Q9EPL8	0.104952	0.146166	-0.0641966	0.797209
Tubb5	P99024	0.00703254	0.217831	-0.0566577	0.691081
Ap3b1	Q9Z1T1	0.000176661	0.21709	-0.0210568	0.758696
Wdfy4	E9Q2M9	0.00229275	-0.451199	0.572955	0.038447
Tom1	Q3UDC3	0.0241046	-0.451438	-0.107089	0.00276488
Psme2	P97372	0.000562502	-0.451797	0.441265	0.0202644
Mrpl40	D3Z7C0	0.0671236	-0.187323	-0.0632465	0.782183
Acad9	Q8JZN5	0.0218169	0.216255	0.0952775	0.599924
Pigk	E9Q421	0.267131	-0.457965	-0.0628912	0.840078
Cryz	A0A0A6YXR4	0.28579	-0.60274	-0.0616155	0.8168
Gaa	P70699	0.00579064	-0.46015	0.340467	0.0408991
Naa50	Q6PGB6-2	0.0284679	0.212637	-0.0654601	0.240937
Gm10094	E9Q317	0.00823505	0.212444	-0.0806158	0.672665
Kpna6	Q4FJZ2	0.552925	0.17034	-0.0610411	0.7849
9030624J02Rik	D3YW19	0.00945624	-0.466882	-0.347283	0.134339
Strn3	B2RQS1	0.306033	0.481713	-0.0607852	0.884305
Arhgef1	E9PUF7	0.0145178	0.211883	0.0200374	0.935046
Cyfip1	Q7TMB8-2	0.740285	0.018698	-0.0606263	0.447406
Shmt1	G3UZ26	0.000555121	-0.469473	-0.22069	0.070466
Acaa1a	Q921H8	2.62896e-07	-0.469497	0.307097	0.0274297
Tmem55a	Q9CZX7	0.389607	-0.385917	-0.0604504	0.832379
Xpo5	Q924C1	0.114625	0.140663	-0.0602377	0.439793
Ddx41	Q91VN6	0.474216	0.0934429	-0.0600561	0.831121
Larp7	Q05CL8	0.0846026	0.970278	-0.0599485	0.782358
Rpl18	P35980	0.00351989	-0.476328	0.231385	0.0398202
Rrbp1	A2AVJ7	0.000277356	0.209566	-0.146377	0.215045
Rpl27	P61358	0.000143507	0.20934	-0.0351896	0.770982
LOC102642752	P62849-2	0.270738	0.0761093	-0.0595491	0.391888
Hmgcl	P38060	1.26888e-06	-0.480071	-0.391923	0.0174566
Cox6b1	P56391	1.57148e-05	-0.482254	0.127057	0.0876817
Pfn1	P62962	0.00249348	0.208111	0.0571525	0.491737
Gcdh	A0A0A0MQ68	0.343623	-0.410824	-0.0592614	0.78919
Srp72	F8VQC1	0.00291678	0.207542	-0.192845	0.42197
Tcp1	P11983	1.31295e-06	0.206655	-0.00665955	0.936792
Rpl10	Q6ZWV3	0.00187149	0.206449	0.0485187	0.580652
D19Bwg1357e	Q8BKS9	0.00262012	0.205295	-0.191546	0.616749
Nomo1	Q6GQT9	0.00106021	0.203175	0.10355	0.232377
Eif1ax	Q8BMJ3	0.0156747	0.202701	0.0152849	0.927533
Vwa5a	Q99KC8	3.29154e-05	-0.497671	-0.207246	0.140581
Gorasp2	A2ATI9	0.0328732	0.201663	-0.0529202	0.787654
Tmed9	Q99KF1	0.0447599	0.201423	0.0738088	0.688559
Pes1	Q5SQ20	0.00262146	0.201207	-0.0814728	0.384398
Fubp3	A2AJ72	0.0153493	0.198815	-0.111202	0.270095
Exoc1	Q5PPR2	0.106751	0.405112	-0.0577667	0.748593
Ccs	Q9WU84	0.326598	-0.586391	-0.05772	0.579799
Eif2s1	Q6ZWX6	0.410438	0.0241897	-0.0569226	0.639125
Wdr77	Q99J09	1.78385e-05	-0.50778	-0.279946	0.154013
Ddx39	Q8VDW0	0.00239709	0.197299	-0.195934	0.226692
Snx8	Q3U0I9	0.00256308	-0.513726	-0.982391	0.032323
Actr10	Q9QZB7	0.645908	0.11838	-0.0566187	0.570521
Cct4	P80315	2.51545e-05	0.196971	0.0763603	0.349137
Ndufa10	Q99LC3	3.18866e-05	-0.5204	-0.187273	0.0938394
Ppa2	Q91VM9-2	0.0377326	-0.522283	-0.319459	0.18377
Sf3b2	Q3UJB0	0.00356476	0.195543	-0.0921577	0.394832
Itgb2	Q542I8	2.55967e-06	-0.523248	0.156937	0.0877123
Scpep1	Q920A5	7.69306e-05	-0.523256	0.271109	0.0641938
Usp14	Q9JMA1	2.32388e-05	0.194085	0.0117255	0.757712
Anp32e	P97822-2	0.0227407	0.193999	-0.142376	0.390762
Huwe1	A2AFQ0	0.0913119	0.254787	-0.0551234	0.241606
Sae1	Q9R1T2	0.0212272	0.193056	-0.223796	0.230742
Mrpl12	Q9DB15	0.199779	0.0462368	-0.0548046	0.685203
Rnpep	Q8VCT3	0.00505583	0.192512	0.00262213	0.979666
Aimp2	Q8R010	0.00433967	0.192465	0.110171	0.204477
Comtd1	Q8BIG7	0.630317	0.0739536	-0.0541334	0.600091
Dusp3	B1AQF4	0.00129921	0.192386	-0.0378665	0.750756
Hars	Q61035	5.02026e-06	-0.533875	-0.208742	0.0738604
LOC100044627	P62830	2.12085e-06	0.191547	-0.168162	0.20174
Sms	P97355	0.138259	0.158368	-0.0520997	0.642921
Dkc1	Q9ESX5	0.446988	0.0519115	-0.0520775	0.704132
Cad	E9QAI5	0.000234496	0.188831	-9.0554e-05	0.999058
Psat1	Q99K85	0.00424896	0.188726	-0.00303899	0.971532
Uchl3	Q9JKB1	0.205433	-0.0774892	-0.0510438	0.866154
Dab2	E9QL31	3.6746e-08	-0.54241	-0.506187	0.0131902
Cyb5a	G5E850	0.000358582	-0.544203	0.994982	0.00132034
Pmm2	Q9Z2M7	0.530828	-0.116565	-0.0509305	0.607413
Acly	Q3V117	0.000194561	0.188437	-0.0297833	0.753438
Mta2	Q9R190	0.00151243	0.188359	-0.0392188	0.414457
Hspd1	P63038	6.99975e-05	0.186755	0.0301188	0.552894
Gm38481	P58044	1.28785e-06	-0.554166	-0.525284	0.000239651
Rrp12	Q6P5B0	0.01235	0.186514	-0.222254	0.271964
Mrpl46	Q9EQI8	0.404158	-0.202201	-0.0490158	0.762706
Nol6	Q8R5K4	0.0209831	0.181942	-0.00271145	0.987874
Dpp9	Q8BVG4-2	0.0121716	-0.56015	-0.230271	0.175239
Opa1	H7BX01	0.000661848	-0.562025	-0.242796	0.0809203
Psmg1	D3Z795	2.96091e-05	-0.563893	-0.422087	0.102343
Cluh	Z4YLI8	0.00383798	0.181544	-0.0812735	0.49324
Ak4	Q9WUR9	0.508319	0.0799361	-0.0478945	0.721751
Amdhd2	Q8JZV7	0.000936527	-0.570491	0.47469	0.0241823
Mad2l1	Q9Z1B5	0.955643	-0.00893871	-0.0474392	0.538016
Cluh	Q5SW19	0.0118126	0.181544	-0.0812735	0.49324
Pddc1	Q8BFQ8	0.0768488	-0.98268	-0.0470511	0.909802
Aspscr1	Q8VBT9	0.969753	0.0089089	-0.0470464	0.940022
Btk	P35991	0.00211506	-0.575407	-0.263205	0.152764
Ywhab	Q9CQV8	0.0148181	0.178187	0.0578969	0.657293
Fkbp8	O35465-2	0.00966676	0.176968	0.18901	0.322925
Psmc4	P54775	0.00293328	0.175778	0.00401355	0.898301
Aldh2	P47738	4.0488e-07	-0.585243	0.130634	0.0158195
Ppp1cb	P62141	0.593923	-0.02148	-0.044933	0.821254
Ndufa5	Q9CPP6	0.000513245	-0.590367	-0.403857	0.156388
Rpl11	Q9CXW4	0.0248033	0.175566	0.111914	0.339497
Rpl13	P47963	0.000448418	0.174621	0.0694644	0.511246
Rplp0	P14869	0.00515403	0.172931	-0.172668	0.353771
Pdha1	P35486	0.264017	-0.0332116	-0.0440899	0.715773
Nrbp1	Q99J45	0.198597	0.206348	-0.0435524	0.923956
Rtca	Q9D7H3	0.103063	-0.243797	-0.0430261	0.856112
Gsr	P47791-2	3.2017e-05	-0.605703	0.913168	0.00280431
Gnl1	P36916	0.176297	0.275737	-0.0429972	0.89883
Rela	Q04207-2	0.0393998	-0.607231	-0.354912	0.198917
Hsdl1	Q8BTX9	0.535735	0.445628	-0.0423639	0.912624
Rwdd1	Q9CQK7	0.487532	0.078384	-0.0420173	0.884108
Nup133	Q8R0G9	0.00727994	0.172478	-0.39208	0.21468
Fabp5	Q05816	1.60629e-06	-0.622802	-0.143852	0.131638
Prpf6	Q91YR7	0.0167969	0.171288	-0.0173571	0.914462
Cwc15	Q9JHS9	0.00021029	-0.623521	-0.470224	0.0726998
Bcap29	Q61334	0.0736791	0.271237	-0.0410409	0.52264
Ugt1a7c	Q6ZQM8	0.000115417	-0.625706	0.175848	0.0544748
Tmlhe	Q91ZE0	0.000887541	-0.626676	-0.699204	0.00823739
Ywhaz	P63101	0.232549	-0.0460221	-0.0407538	0.797706
Sfn	O70456	0.0116692	0.1706	-0.35111	0.284056
Cndp2	Q9D1A2	1.96423e-06	-0.628949	0.186207	0.0395306
Tnfaip8l2	Q9D8Y7	0.00091563	-0.630356	-0.177258	0.0367781
Ndufa12	Q7TMF3	0.000469342	-0.635235	-0.334912	0.110803
Rfc5	Q9D0F6	0.0400407	-0.636211	-0.526525	0.134616
Gusb	P12265	0.000176795	-0.636676	-0.243654	0.0341262
Ola1	Q9CZ30	0.018307	0.170286	-0.00652595	0.864553
Eif1	P48024	3.24699e-05	-0.639788	-0.223056	0.00593529
Casp3	P70677	0.000698545	-0.643593	0.167758	0.119356
Dhx38	Q80X98	0.00354289	0.170047	0.34121	0.421085
Mavs	Q8VCF0	0.000200569	-0.653749	0.218769	0.077418
Farsa	E9PWY9	0.0131878	0.169435	0.0477303	0.65722
Dnaja3	Q99M87-2	0.00247564	0.168885	0.108529	0.481064
Klc1	Q5UE59	0.00149611	0.167923	0.203084	0.368769
Ppp2r1a	Q76MZ3	0.000127607	0.165118	0.0274822	0.770114
Hspa4	Q3U2G2	3.08605e-07	-0.658104	0.0600976	0.0339178
Mocs3	A2BDX3	0.536963	-0.592005	-0.039117	0.931031
Cars	Q9ER72-2	0.000343163	-0.660686	0.171861	0.131192
Ndrg1	Q62433	0.00129876	-0.664861	-0.753334	0.00311376
Calr	P14211	6.1191e-06	0.164495	0.157336	0.456683
Ipo4	Q8VI75	0.00497111	0.163298	-0.0122876	0.967915
Ptgs1	P22437	0.750417	-0.153042	-0.0389397	0.876744
Blvra	Q9CY64	6.99183e-08	-0.669107	-0.313766	0.00477571
Cct8	P42932	0.00118842	0.16221	-0.0155947	0.816905
Oxct1	Q9D0K2	0.261299	-0.0311404	-0.0386192	0.575329
Ubtf	A2AWT6	0.03636	0.161678	-0.0217343	0.899047
Sdf2l1	Q9ESP1	0.00715586	0.161353	0.0984318	0.656611
Ipo9	E9QKZ2	0.0396625	0.161124	0.154997	0.515436
Arl6ip5	Q8R5J9	0.116296	-0.241738	-0.0381508	0.814424
Abhd14b	A0A087WP24	0.000891462	-0.684916	-0.648947	0.0467253
Copz1	P61924	0.00324585	0.159592	0.0591806	0.728113
Ctsa	G3X8T3	2.92437e-07	-0.688118	0.15468	0.133075
Aldh18a1	Q9Z110-2	0.00045122	0.157681	0.00180422	0.949819
Acadm	P45952	2.48206e-06	-0.690294	-0.238334	0.116065
Hnrnpr	Q8VHM5	0.825442	0.0110173	-0.0377708	0.291277
Phb2	O35129	4.16005e-05	0.155796	-0.0351816	0.61297
Clns1a	Q923F1	0.0779271	0.484612	-0.0372928	0.837176
Pcca	Q91ZA3	0.000740006	-0.697968	-0.427683	0.1924
Ptgr1	Q91YR9	1.09535e-05	-0.698352	0.945376	0.00154433
Txnl1	Q8CDN6	0.0073267	0.155768	0.0993231	0.289691
Ndufb10	D3YUK4	0.779926	0.0567066	-0.0365084	0.841486
Slc9a3r1	P70441	1.09435e-05	-0.711229	-0.0984986	0.109621
Arf1	P84078	0.494421	-0.125027	-0.0364845	0.915057
Mcee	Q9D1I5	9.80245e-05	-0.716635	0.462791	0.112574
Capza2	P47754	8.63449e-07	-0.72173	0.142336	0.00118846
Gm20431	E9PY39	0.538847	-0.314818	-0.0361968	0.535287
Trmt2a	Q3UYU2	0.0462029	0.154701	0.232741	0.32259
Acat2	G3XA25	4.09622e-06	-0.724861	-0.0943031	0.141044
AI314180	Q6PDI5	0.00966071	0.152596	-0.00685677	0.94819
Ppib	P24369	3.80628e-09	-0.732696	0.47236	0.0829222
Ndufv1	D3Z1U9	4.21312e-07	-0.73336	-0.183021	0.00846086
Zmpste24	Q80W54	0.0363453	0.149523	0.195783	0.595139
Txnrd1	Q9JMH6-2	1.50298e-07	-0.736309	0.350013	0.013547
Npepl1	Q6NSR8	0.000485556	-0.737934	0.364476	0.140866
Pcna	P17918	3.28248e-08	-0.738347	-0.292695	0.0587843
Hspa14	Q99M31	0.0107641	0.14885	-0.194178	0.488999
Vcp	Q01853	1.0346e-09	-0.744125	0.148081	0.0611089
Eif2s3x	Q9Z0N1	0.836016	-0.00720333	-0.0358517	0.746386
Rrm1	P07742	1.05396e-05	-0.747898	-0.520417	0.00802871
Ndufa8	Q9DCJ5	2.3649e-05	-0.748447	-0.160459	0.045554
Uqcr10	Q8R1I1	0.4777	-0.12028	-0.035719	0.954239
Nup37	Q9CWU9	0.0288864	0.147178	0.196713	0.283561
Pds5a	E9QPI5	0.0461418	0.145888	-0.153736	0.310901
Tecr	Q9CY27	0.487653	0.0502993	-0.0353984	0.77494
Dip2b	Q3UH60	0.00197418	-0.765674	-0.426324	0.0491563
Psmd1	Q3TXS7	0.00448816	0.14289	0.0901423	0.326294
G3bp2	P97379-2	0.0378883	0.142536	-0.0305959	0.762032
Stoml2	Q99JB2	0.0112631	0.14094	0.127865	0.537877
Timm13	P62075	5.23899e-05	-0.769631	-0.229205	0.046646
Elac2	B1ATP7	5.21533e-05	-0.770213	-0.131794	0.167844
Ube2m	P61082	0.675095	-0.0452747	-0.0351392	0.775452
Rpl14	Q9CR57	0.00277356	0.14068	0.0354835	0.81771
Afg3l2	Q8JZQ2	0.111889	-0.128622	-0.0348635	0.751779
Hrsp12	P52760	0.0342971	-0.778874	0.30442	0.0967688
Ppp2ca	P63330	0.0342072	0.139425	-0.115454	0.556102
Dars	Q922B2	0.00624773	0.136497	-0.0237145	0.872333
Rpl28	P41105	0.0168144	0.132193	-0.031971	0.821497
Mrpl10	Q3TBW2	0.0442814	0.129385	-0.00514657	0.985499
Atrx	Q61687	0.00413248	-0.789107	-0.378202	0.0197458
Grpel1	Q99LP6	0.0304317	0.129232	0.102723	0.290779
Copa	Q8CIE6	0.0467269	0.124126	0.0800468	0.253029
Mrpl19	Q9D338	0.000667372	-0.798641	0.464705	0.0618826
Gmpr2	Q99L27	0.000144297	-0.800112	0.464761	0.0570081
Hadha	Q8BMS1	1.37048e-07	-0.809328	-0.148554	0.032948
Smchd1	Q6P5D8	0.0390365	0.12345	-0.148536	0.214017
Afg3l1	Q920A7-2	0.899576	-0.0730594	-0.0313033	0.888834
LOC102641678	Q9DB20	0.000221761	0.121794	0.0362955	0.693823
Oat	P29758	0.522862	0.0303804	-0.0310636	0.597699
Tpp1	O89023	0.00108772	-0.815472	0.167811	0.0249396
Hcls1	P49710	0.00237642	-0.815489	0.582668	0.00350714
Ckap4	Q8BMK4	0.0157937	0.12091	0.00216914	0.975541
Slc16a1	P53986	0.0491615	0.118412	0.14079	0.450667
Dnm1l	E9PUD2	0.654672	0.017482	-0.0307469	0.835477
Erp29	P57759	1.46036e-06	-0.821356	-0.291405	0.0193269
Anp32a	O35381	0.0265487	0.116695	-0.0701774	0.587721
Chd4	E9QAS4	0.493296	-0.0388077	-0.0306435	0.711739
Clip1	D3Z2Z1	1.61086e-05	-0.825279	0.398341	0.03075
Ddx39b	Q9Z1N5	0.0163466	0.11428	-0.0525454	0.377905
Ddx52	Q8K301	0.0513103	1.39024	-0.0305519	0.930651
Vbp1	Q3TIR6	0.000254392	-0.832832	0.131784	0.124284
Skp1a	Q9WTX5	0.00113754	-0.834174	-0.159859	0.0270954
Rpl4	Q9D8E6	0.0114071	0.113832	0.0475063	0.388142
LOC102642137	P62301	0.0383099	0.104344	-0.0165738	0.863281
Psma1	Q9R1P4	2.99543e-08	-0.837057	0.137207	0.196463
Rpl17	Q6ZWZ7	0.00500727	0.0962963	-0.00698867	0.892887
Immt	Q8CAQ8-3	0.00692181	0.0950802	-0.550655	0.295934
Mpi	Q924M7	0.00664643	-0.843699	-0.960741	0.0940658
Immt	Q8CAQ8-2	0.0174818	0.0950802	-0.550655	0.295934
Rnh1	Q91VI7	0.00588191	0.0907551	-0.107371	0.258178
Rpl3	P27659	0.0227326	0.0880699	-0.00775911	0.924546
Lypla1	J3QP56	4.66507e-06	-0.849412	0.0922303	0.0362309
Rexo2	Q9D8S4	0.0085234	-0.856972	0.443898	0.0771243
Lrrc40	Q9CRC8	0.0973776	-0.218111	-0.0287179	0.850636
Skiv2l2	Q9CZU3	0.795722	-0.0179403	-0.0284095	0.78387
Pnp	Q543K9	9.5187e-06	-0.868767	0.383043	0.0324601
Dpysl2	O08553	9.26897e-08	-0.869261	-0.135624	0.175612
Flnc	D3YW87	0.94085	0.00558881	-0.0283312	0.697982
Mrpl28	Q9D1B9	0.55832	0.128011	-0.0281255	0.875693
Uchl5	Q9WUP7-2	0.111781	0.0768936	-0.0272412	0.763354
Ruvbl1	P60122	0.0399259	0.0848588	-0.0855531	0.48938
Urod	P70697	0.87047	0.0252169	-0.0271785	0.944535
Ndufa2	Q9CQ75	1.55966e-06	-0.88906	-0.371581	0.0539626
Ccdc124	Q9D8X2	0.0280056	-0.891189	0.197703	0.152189
Anxa2	P07356	2.02558e-07	-0.891512	-0.182283	0.1563
Scyl1	Q9EQC5	0.304409	0.245751	-0.026537	0.878941
Ndufs1	Q91VD9	1.28228e-05	-0.894644	-0.533901	0.00806617
Sirpa	Q6P6I8	4.2836e-10	-0.896234	0.177417	0.024003
Atp5a1	Q03265	0.0108514	0.0686073	0.039048	0.214026
Pum2	Q3TQ29	0.170117	0.720989	-0.0262144	0.955085
Fhod1	Q6P9Q4	0.0127479	-0.905692	-0.606162	0.00173949
Creg1	O88668	1.45557e-08	-0.907359	0.761471	0.00621795
Plcg2	Q8CIH5	0.187151	-0.0523971	-0.0261449	0.779802
Pafah1b1	P63005-2	0.000733845	0.0249052	0.0823192	0.77803
Pebp1	P70296	1.57486e-08	-0.914232	0.22751	0.0501101
Polr2h	Q923G2	0.0542461	0.149041	-0.0250846	0.93363
Nemf	Q8CCP0-3	0.0572813	0.290985	-0.024785	0.896171
Efhd2	Q8C845	0.000100841	-0.919693	0.294399	0.096474
Mdh2	P08249	0.0356531	-0.0626274	0.0552115	0.490592
Lipa	Q9Z0M5	0.039903	-0.92195	1.03421	0.0074102
Cwc27	Q3TKY6	0.338876	0.0855931	-0.023859	0.95763
Msn	P26041	2.44866e-06	-0.926065	0.391088	0.00857632
Anpep	P97449	0.0349731	-0.0821295	-0.116098	0.437414
Grhpr	Q91Z53	0.00118589	-0.942147	-0.294511	0.0556511
Got2	P05202	0.00836721	-0.103322	-0.0799692	0.477146
Idh2	P54071	0.0166061	-0.107648	-0.0228751	0.653903
Hist1h4m	P62806	0.0326816	-0.11557	-0.53965	0.26792
Sf3b5	Q923D4	0.110712	0.917684	-0.0228785	0.894703
Echs1	Q8BH95	0.0318814	-0.116526	0.0275184	0.712282
Vps41	Q5KU39	0.279676	-0.136371	-0.0222884	0.944699
Psma6	Q9QUM9	4.13147e-08	-0.960262	0.233184	0.0537014
Atl3	E9PYT3	0.0470138	-0.116701	0.101532	0.553322
Wdr1	O88342	0.00406094	-0.117318	0.101515	0.295532
Gm21596	P63158	0.000334095	-0.966643	-0.156188	0.180757
Adsl	P54822	2.09034e-08	-0.970299	-0.18413	0.0474763
Tpt1	P63028	0.615573	-0.0350579	-0.0215172	0.837386
Trap1	Q9CQN1	0.0224482	-0.11784	0.0531444	0.554553
Letm1	Q9Z2I0	0.298746	0.124893	-0.0214748	0.884935
Tomm22	Q9CPQ3	0.866858	-0.0239147	-0.0214596	0.921689
Pak2	Q8CIN4	0.0124009	-0.123378	-0.0552559	0.496764
Scp2	P32020-2	2.72704e-06	-0.981881	-0.164333	0.193122
Eif3j1	Q3UGC7	2.18541e-07	-0.999808	-0.233789	0.0303174
Csnk2a1	Q60737	0.0933516	-0.0923069	-0.0210312	0.88857
Ndufs6	P52503	3.01173e-06	-1.00248	-0.34709	0.0198204
Gnb1	P62874	0.00324868	-0.129835	-0.0360794	0.815183
Hadhb	Q99JY0	8.10601e-06	-1.01015	-0.433826	0.0062061
Tcof1	H3BL37	0.494439	-0.0464234	-0.0207836	0.84439
Aifm1	Q9Z0X1	0.0166271	-0.130338	0.0107867	0.938556
Trappc13	J3QNW4	0.457889	0.185303	-0.0206162	0.95088
Tomm40	Q9QYA2	0.0576886	0.0947415	-0.0199982	0.797347
Akr1b8	P45377	0.000239177	-1.02693	0.172171	0.146674
LOC105247253	Q9CWW6	0.0132419	-1.03536	0.191357	0.0225117
Ahnak	E9Q616	2.85987e-10	-1.03679	-0.111744	0.0380558
Tagln2	Q9WVA4	2.62291e-07	-1.03868	0.310756	0.00537946
Armc8	G3X920	0.284936	0.555237	-0.0199172	0.913233
Rab11b	P46638	0.00217413	-0.131758	0.0938081	0.453684
Ppp1ca	P62137	0.0203339	-0.13283	-0.0707443	0.503285
Prdx3	P20108	0.0134999	-0.135327	0.0822516	0.252799
Ppat	Q8CIH9	0.0145616	-1.06171	-0.832867	0.0254197
Bcap31	Q61335	0.278862	-0.129869	-0.0192364	0.817181
Pdcd10	Q8VE70	0.088051	-1.16977	-0.0191955	0.947614
Atp1a1	Q8VDN2	0.00113802	-0.137546	-0.0335853	0.567069
Psma2	P49722	3.56469e-08	-1.06734	0.161891	0.0549216
Mcl1	P97287	0.000190971	-1.06847	-0.302628	0.167246
Gsto1	O09131	6.19533e-10	-1.06968	0.176206	0.180566
Anxa1	P10107	3.14773e-09	-1.0749	-0.272294	0.00226872
Hmgb2	P30681	2.29825e-09	-1.07638	-0.299914	0.0159433
Set	A2BE93	1.83477e-07	-1.0803	-0.181799	0.0476452
Set	Q9EQU5-2	1.0439e-05	-1.0803	-0.181799	0.0476452
Zfp706	Q9D115	3.81597e-07	-1.08054	-0.704308	0.0688413
Uba5	F6VRI6	0.0234061	-1.08382	0.522562	0.154073
Nup205	B9EJ54	0.772023	0.0250692	-0.019122	0.845177
Aaas	P58742	0.460158	-0.0682083	-0.0188337	0.940199
Dhx37	Q6NZL1	0.591018	0.288328	-0.0185913	0.968389
Hpcal1	P62748	0.000334464	-1.09744	-0.223648	0.107086
Hspbp1	Q99P31	0.000628126	-1.09754	-0.503513	0.00974874
Dnajc8	Q6NZB0	0.0935577	-0.161566	-0.0183724	0.953785
Tomm20	Q9DCC8	0.800647	0.0588245	-0.0183525	0.960005
Sash3	Q8K352	0.0377186	-1.10733	-0.541649	0.101932
Snrpa1	P57784	0.136033	-0.139778	-0.0176455	0.663687
Ak2	Q9WTP6-2	4.21314e-06	-1.12774	-0.13389	0.00972292
Gsn	P13020-2	3.45494e-10	-1.12787	-0.673756	0.0120922
Rtcb	Q99LF4	0.0877457	0.10365	-0.0174653	0.813013
Fmnl1	A2AB60	0.814618	-0.0165743	-0.0174648	0.871741
Ilf2	Q9CXY6	0.0369282	-0.141247	-0.247863	0.220861
Xpo1	Q6P5F9	0.220385	-0.100883	-0.017361	0.923688
Psap	E9PZ00	6.01053e-07	-1.13808	0.323047	0.0494445
Rpn2	Q9DBG6	0.0143308	-0.145279	0.010312	0.962234
H3f3a	P84244	0.0978524	0.77503	-0.0171221	0.981057
Cat	P24270	1.26647e-10	-1.14501	0.841271	0.0029919
Hdgf	P51859	1.07429e-08	-1.14657	0.0770841	0.162223
Snrpd1	P62315	0.00624412	-0.148393	-0.175257	0.408981
Pfas	Q5SUR0	2.50606e-07	-1.16037	-0.140608	0.152517
Atp6v1b2	P62814	0.00772413	-0.148598	0.0480261	0.2741
Ythdf3	Q8BYK6	1.66006e-08	-1.17063	-0.290685	0.0434959
Manf	Q80ZP8	7.61976e-06	-1.17513	0.211923	0.0684043
Prkar1a	Q9DBC7	0.0245301	-0.149218	0.122935	0.220964
Rab8b	P61028	0.434314	0.0590088	-0.0158398	0.883805
Cbr4	Q91VT4	0.0284278	-1.18022	-0.0976137	0.154406
Picalm	Q7M6Y3-2	1.58082e-05	-1.18204	-0.648697	0.000892102
Picalm	Q7M6Y3-4	0.00940674	-1.18204	-0.648697	0.000892102
Tpd52	D3Z637	1.11027e-08	-1.18729	-0.214622	0.163215
Actn4	P57780	7.00863e-08	-1.19408	-0.149308	0.0576688
Rab2a	P53994	0.0243399	-0.150294	-0.0347355	0.800576
Grcc10	O35127	3.90923e-06	-1.19894	0.781485	0.0045583
Ap2m1	Q3TWV4	0.00159837	-0.150709	0.0472506	0.534497
Arl8b	Q9CQW2	0.0279845	-0.152548	-0.217595	0.362243
Itpa	Q9D892	1.83655e-05	-1.21793	0.232366	0.0652355
Mcm2	P97310	0.0204405	-0.153808	-0.177637	0.346543
Npc2	Q9Z0J0	8.6385e-05	-1.23301	0.242854	0.125958
Gm4737	P50247	6.9187e-09	-1.23961	-0.135289	0.0642093
Cox6a1	Q9DCW5	0.71095	0.246275	-0.014991	0.96387
Gss	Q3UEE2	5.97992e-05	-1.24602	0.634497	0.0212004
Atg7	Q9D906	0.0228871	-0.154478	0.00398177	0.937936
Sucla2	Q9Z2I9	0.0229624	-0.158057	-0.0516023	0.451069
Tmf1	B9EKI3	0.0283167	-1.25889	-0.736037	0.0424882
Arf5	P84084	0.0104678	-1.26715	-2.7242	0.126468
Prdx6	Q6GT24	1.61556e-09	-1.28219	0.183355	0.167589
Rab6a	P35279	0.11985	-0.159663	-0.0144748	0.944336
Ctps2	P70303-3	0.0328365	-1.28648	0.446618	0.101148
Cap1	P40124	8.2746e-09	-1.29777	-0.0719332	0.0955382
Sqrdl	Q9R112	7.19585e-07	-1.29867	0.445857	0.157945
G6pdx	Q00612	8.06457e-09	-1.30248	0.411799	8.79653e-05
Gstm1	P10649	2.11968e-07	-1.31241	0.631984	0.0276725
Rac1	Q3TLP8	5.6765e-06	-1.31949	-0.148073	0.196647
Gm10705	P68037	2.32575e-08	-1.32688	-0.428178	0.178477
Rpl5	P47962	0.508013	0.0336095	-0.0144514	0.823547
Ehbp1l1	E9QP49	0.778426	-0.0349665	-0.0140822	0.946244
Fcgr3	E9PUV2	4.2036e-05	-1.3542	-0.441754	0.190906
Glyr1	D3YYT1	0.525919	0.0614604	-0.0136911	0.934494
Gdi2	Q61598	1.20095e-10	-1.36727	-0.0715627	0.0267182
Pter	A2AUR3	0.171863	-0.626967	-0.0134046	0.903982
Ogfod1	D3YTU2	0.137974	0.376542	-0.0133307	0.977537
Pdia4	P08003	0.000164705	-0.159012	0.0921994	0.381194
Tcea1	P10711	0.0255849	-0.159192	-0.0612163	0.736836
H2afy	Q9QZQ8-2	0.498602	-0.0393403	-0.0129411	0.893953
Eif2b4	D3Z780	0.184772	0.111217	-0.0126926	0.970783
Nsfl1c	Q9CZ44	0.01943	-0.159535	-0.0499464	0.621625
Tpr	F6ZDS4	0.0658256	0.404034	-0.0125801	0.737261
Ndufs3	Q9DCT2	7.47329e-05	-1.40071	-0.446887	0.0236448
Paics	Q9DCL9	0.00088642	-0.160889	0.0033596	0.964941
Mrps35	Q8BJZ4	0.0396703	-1.41269	-0.483414	0.0741695
Hpgds	Q9JHF7	0.0260023	-1.4181	-0.67255	0.0236848
Cfl1	P18760	0.000309449	-0.161395	-0.0303989	0.657082
Gm2a	Q60648	0.0136666	-1.42727	-0.456155	0.143284
Cox4i1	P19783	0.00255087	-0.161451	0.0501581	0.482857
Vars	Q9Z1Q9	0.00768048	-0.163092	-0.0303643	0.37799
Hist1h1e	P43274	0.0114947	-0.165261	-0.166414	0.46237
Syap1	Q9D5V6	0.00442328	-1.43988	0.574064	0.0280072
Arhgap30	E9QMX7	0.358609	-0.400566	-0.0115003	0.964584
Dnm2	Q3T9X3	0.744662	0.0189353	-0.0114107	0.9488
Hsd17b4	P51660	0.00333131	-0.168101	0.0279647	0.656909
Pa2g4	P50580	0.524893	0.0218568	-0.0109919	0.887136
Nup54	Q8BTS4	0.941295	0.0133067	-0.0107789	0.972011
Idh1	O88844	2.49673e-08	-1.46174	-0.109095	0.0221821
Mtdh	Q80WJ7	0.0118397	-0.169515	0.0580385	0.341787
Usp8	A2AI52	0.00276918	-1.47891	-0.461519	0.0857852
Aldoa	P05064	3.42939e-09	-1.48176	0.0894285	0.167863
Pfkl	P12382	0.0172238	-0.171681	-0.0443965	0.559823
Pgd	Q9DCD0	4.96927e-09	-1.49013	0.327353	0.00618198
Arpc1b	Q91Z25	0.0955345	-0.0819016	-0.00955349	0.929271
Etfb	Q9DCW4	0.000719125	-0.172818	0.119281	0.483714
Akr1b10	D3Z494	0.0281172	-0.176988	0.142496	0.228216
Spats2	Q8K1N4-2	0.758921	0.111923	-0.00913781	0.973109
Zfp330	Q922H9-2	0.0512304	0.9799	-0.00862324	0.961139
Psmb10	O35955	0.0962188	-0.234191	-0.008404	0.936308
Abce1	P61222	0.00124462	-0.177847	-0.128246	0.393142
Fyb	O35601	0.0221993	-1.52989	1.53154	0.000490965
Mtpn	P62774	0.0161165	-0.178724	0.0229496	0.880703
Cmpk1	Q9DBP5	0.07544	0.1053	-0.00774999	0.92715
Slc25a24	Q8BMD8	0.914606	0.00819561	-0.00757759	0.924088
Atp1a3	A0A0G2JGX4	0.00360238	-0.180163	-0.234304	0.70587
Atp6v1e1	P50518	0.000356293	-0.180276	0.165839	0.263239
Ptpn6	P29351	0.0017285	-0.181348	-0.07624	0.425519
Psme3	P61290	0.00367273	-0.186303	-0.152754	0.282242
Mak16	Q8BGS0-2	0.0297431	-0.190937	-0.122055	0.623601
Hnrnpab	Q99020	0.0131303	-0.19102	-0.0658998	0.671671
Etfa	Q99LC5	0.000100139	-0.192152	-0.0296506	0.788831
Rps5	D3YYM6	0.0035592	-0.194359	-0.0350398	0.751325
Numa1	E9Q7G0	0.00393794	-0.198009	-0.0832389	0.52908
Dock2	Q8C3J5	0.0421289	-0.198144	-0.161318	0.333153
Taldo1	Q93092	6.60875e-09	-1.61751	0.474226	0.00463637
Ap2a1	P17426-2	0.000515983	-0.201338	-0.0208828	0.71166
Got1	P05201	2.90825e-08	-1.63619	-0.166934	0.0139083
Atp6ap1	Q3TKX1	0.00127421	-1.64921	0.515849	0.123138
Actr2	P61161	0.0034638	-0.201698	-0.0112655	0.890101
S100a11	P50543	7.58623e-05	-1.67527	0.492192	0.122408
Apoa1bp	Q8K4Z3	1.09397e-05	-1.67792	0.296212	0.181547
Grb2	B1AT92	2.23279e-06	-1.67842	0.232966	0.199339
Alcam	E9Q4G8	0.00604874	-0.20392	-0.255078	0.211401
Fabp4	P04117	6.40891e-09	-1.69756	-0.547277	0.00439739
Hnrnpul2	Q00PI9	0.00253016	-0.204869	0.0203261	0.879592
Tmsb4x	P20065-2	1.94194e-06	-1.70742	0.490385	0.0399382
Mrpl1	Q99N96	0.000608186	-0.205744	-0.183495	0.24854
Snx4	Q91YJ2	0.0189988	-0.206144	-0.272483	0.295544
Pgm2	Q9D0F9	3.55166e-07	-1.73347	0.185463	0.122486
Cops3	O88543	0.0157397	-0.207967	-0.106959	0.454292
Lrpprc	Q6PB66	0.00223777	-0.208645	0.12126	0.200681
Ptpn7	Q8BUM3	0.309961	-0.704006	-0.00469715	0.985906
Lamp1	P11438	0.0190651	-0.209274	-0.0663079	0.831065
Eif5a	P63242	0.0562068	0.163894	-0.00448843	0.957276
Ccdc58	E9Q4B5	0.0022576	-1.78021	0.619816	0.141831
Pmpcb	Q9CXT8	0.0168604	-0.210374	-0.091495	0.525466
Rab8a	P55258	0.415179	-0.0605384	-0.00384743	0.977315
Tsta3	P23591	0.295464	-0.0486297	-0.00384044	0.968104
Actn1	A1BN54	8.21083e-06	-1.8327	0.357539	0.0988901
Rbmxl1	Q91VM5	0.0109207	-0.212135	-0.0739607	0.254189
Lrp1	Q91ZX7	7.25546e-05	-1.85376	-0.198111	0.0295684
Coro7	Q9D2V7	0.0326539	-0.212446	-0.0842953	0.66879
Hist1h1c	P15864	0.000645103	-0.212568	-0.22251	0.353009
Dbi	P31786	3.65587e-08	-1.9041	-0.498934	0.137123
Vcl	Q64727	4.36806e-05	-1.92911	-0.461071	0.00828069
Tmsb10	Q6ZWY8	6.27077e-07	-1.93258	0.334501	0.164822
Capg	Q99LB4	0.000415207	-0.213303	0.0449835	0.285244
Fen1	Q91Z50	0.00168453	-0.215135	-0.173163	0.28604
Stmn1	P54227	7.25863e-09	-1.98262	-0.290397	0.0507687
Myo1g	Q5SUA5	0.00843035	-0.218395	0.195683	0.526935
Pgp	Q8CHP8	0.000326348	-2.00451	-0.318088	0.0514739
S100a6	P14069	0.000895755	-2.0214	-0.793396	0.0628262
Hn1l	Q6PGH2	0.00940831	-2.03806	0.110802	0.0437139
Luc7l3	Q5SUF2	0.314032	0.172969	-0.00330851	0.990619
Htra2	D3YX27	0.326546	-0.177463	-0.00330105	0.989008
Irf2bp2	E9Q1P8	0.00606775	-2.08608	-0.295172	0.0301626
Bcat2	O35855	0.000334661	-0.218784	0.0890626	0.249776
Mrc1	Q61830	0.00020088	-2.10731	-0.406236	0.0217361
Sumo1	P63166	0.00617175	-0.220787	0.134863	0.306876
Cops4	O88544	4.63878e-05	-0.222517	-0.077737	0.449702
Lrpap1	P55302	0.000625998	-0.223427	-0.111526	0.61276
Gmppb	Q8BTZ7	0.0027607	-2.12425	0.260541	0.0335253
Lsp1	P19973-2	8.65516e-06	-2.13398	-0.344621	0.153524
Hcfc1	Q61191	0.00929935	-0.224891	-0.0517298	0.27652
Rps8	P62242	0.187957	-0.0712989	-0.00171834	0.985547
Tsfm	Q9CZR8	0.00339247	-0.225701	0.0758791	0.761488
Ndufs4	E9QPX3	0.00710861	-2.25902	-0.35507	0.0244717
Ogdh	Q60597	3.42195e-05	-0.226374	0.151137	0.211166
Acot13	Q9CQR4	4.77714e-07	-2.32677	-0.372017	0.00675239
Mvd	Q99JF5	0.297788	0.11072	-0.000666959	0.991251
Ncf2	O70145	0.00132727	-0.228424	0.101315	0.539106
Pgm1	Q7TSV4	1.00017e-07	-2.34574	-0.284045	0.100195
Rpl38	Q9JJI8	0.422732	0.0618646	-0.000409004	0.992466
Pin1	Q9QUR7	0.644949	-0.0786526	-0.000388483	0.998052
Ndufa6	Q9CQZ5	0.0158722	-2.45345	-0.22563	0.0241972
Prpsap1	B1AT82	0.0392694	-0.230261	-0.0887561	0.387048
Nasp	B1AU76	0.000679232	-0.230532	-0.180814	0.258014
Fam21	Q6PGL7	0.00098988	-2.51378	0.259787	0.0924408
Hist1h1d	P43277	0.000781523	-0.230687	0.0151138	0.921511
Adh5	P28474	5.74929e-07	-0.231265	0.0438834	0.723521
Myg1	Q9JK81	0.00853519	-2.59073	0.105929	0.171379
Aldoc	P05063	2.09175e-09	-2.60034	-0.10561	0.179944
Rfc2	Q9WUK4	0.0842217	-0.121713	0.00139448	0.998057
Myo5a	D3YZ62	0.00407665	-0.231504	-0.00600104	0.963689
Tufm	Q8BFR5	0.220996	0.0338026	0.00180033	0.978923
Acads	Q07417	0.00188091	-0.235287	0.0929032	0.371385
Atp6v1f	Q9D1K2	0.00152109	-0.237042	-0.0352332	0.729436
Prep	Q9QUR6	0.00150377	-0.237228	-0.0382747	0.778891
Mrps23	Q8VE22	0.0403832	-0.238667	-0.18167	0.413526
LOC105242733	Q9D937	0.198852	-0.643469	0.00242976	0.992034
Ddt	O35215	4.47263e-05	-3.16032	0.265044	0.132652
Acadvl	P50544	0.000384173	-3.20022	-0.572402	0.195598
Sord	Q64442	0.00048447	-3.2092	-0.118767	0.167469
Mrpl15	Q9CPR5	0.153489	-0.206017	0.00259802	0.989315
Cpsf3	Q9QXK7	0.0389027	-0.241624	-0.186555	0.4473
Atp6v1a	P50516	6.90643e-07	-0.242165	0.0746342	0.245249
Selenbp1	P17563	2.89009e-09	-3.66439	-0.695179	0.0109945
Gm4705	Q9D1R9	0.534589	0.02335	0.0031809	0.973901
Stip1	Q60864	0.000771172	-0.242619	-0.00492579	0.952894
LOC100862446	Q9CPX4	6.56751e-06	-4.28677	-0.420639	0.0187597
Ahnak2	E9PYB0	6.32309e-09	-4.80749	0.755477	0.000139057
Sod1	P08228	2.40512e-08	-4.90451	-0.177636	0.150099
Vat1	Q62465	0.000437415	-0.24364	0.170857	0.287484
Sdha	Q8K2B3	9.26132e-08	-0.244685	0.00908686	0.812727
Atp6v1h	A0A0A6YX18	6.13142e-05	-0.248279	0.0891608	0.202178
Nudcd2	Q9CQ48	0.17708	0.106819	0.00401176	0.978522
Chmp4b	Q9D8B3	0.0171847	-0.251122	0.138343	0.40262
Kcnab2	Q3UPV6	0.224363	0.128886	0.00419565	0.987914
Dhrs1	Q99L04	0.00198004	-0.251383	0.0350037	0.917295
Mapkapk2	P49138	0.0515827	0.582773	0.589557	0.0166275
Ap1g1	Q8CBB7	0.0264021	-0.252425	0.0700079	0.609206
Mrps16	Q9CPX7	0.0123802	-0.253801	0.0686777	0.838459
Sec23a	E9Q1S3	0.936489	0.0215713	0.00466085	0.95226
Zc3h18	H3BIW0	0.220159	0.150946	0.00467935	0.985553
Bsdc1	B2KGE3	0.219249	0.449523	0.00469471	0.978345
Stxbp2	F8WGM5	0.0530122	-0.166693	0.29128	0.0863838
Luc7l	Q9CYI4	0.0531461	1.30596	-0.875729	0.00360017
Hnrnpk	P61979-2	0.0533206	0.0731435	-0.167662	0.00626521
Gps1	Q3MIA8	0.0112065	-0.254906	-0.0354638	0.833063
Setd3	Q91WC0	0.206167	-0.241709	0.00472778	0.988991
Sart3	Q9JLI8	0.0538385	0.172657	-0.295375	0.0608013
Cox5a	P12787	0.717883	-0.0340554	0.0054599	0.96613
Tbrg4	Q91YM4	0.854171	0.0201913	0.00553193	0.978139
Ctsz	Q9WUU7	0.0546817	-0.181719	0.214338	0.134799
Pgls	Q9CQ60	0.0546893	-0.170132	0.177108	0.0385059
Kti12	Q9D1R2	0.0547764	0.66729	-0.640483	0.0554173
Rtn4	Q99P72	0.0548512	0.111422	-0.246809	0.0920768
Plod3	Q9R0E1	0.054922	0.765423	-0.242717	0.161991
Pfkp	Q9WUA3	0.0549561	-0.0950009	-0.20048	0.0458681
Vps35	Q9EQH3	0.0032814	-0.254988	-0.0343054	0.633588
Trim25	Q5SU71	0.0554729	-0.0876793	-0.690648	0.041062
Arfgef2	A2A5R2	0.0558014	-0.208513	0.499167	0.0947501
Rars	Q9D0I9	0.399959	-0.0319821	0.00645984	0.902072
Nsf	P46460	0.180701	0.0802521	0.0066479	0.922606
Trmt112	Q8VCR4	0.0298426	-0.256911	0.173573	0.505347
Fam120a	Q6A0A9	0.00127438	-0.259992	-0.0736243	0.439967
Lacc1	Q8BZT9	0.260813	0.246577	0.00724902	0.989228
Atl2	Q6PA06	0.0661558	-0.53062	0.00727134	0.966999
Vamp4	Q8BSN6	0.0811139	-1.19375	0.00797371	0.981686
Rdh11	Q9R1R8	0.00939257	-0.263204	0.203648	0.349511
Hist1h2al	F8WIX8	0.00750709	-0.263509	-0.123529	0.571824
Denr	E9Q0G1	0.0583688	-0.193481	0.496701	0.087659
Vps39	Q8R5L3-2	0.0863126	-0.727266	0.00814335	0.985735
Sec31a	Q3UPL0-2	0.478071	0.036891	0.00831233	0.823877
Fau	Q642K5	0.0134368	-0.264096	-0.00674039	0.972211
Myo1f	Q8CG29	0.00293789	-0.266263	0.071761	0.345149
Dlat	Q8BMF4	0.455589	0.0386332	0.00874516	0.955042
Yars2	Q8BYL4	0.487232	-0.100905	0.00893857	0.97345
Ppp6r3	G5E8R4	0.00490058	-0.268287	0.0506781	0.876
Rps19	Q9CZX8	8.95894e-05	-0.268519	0.00455321	0.954012
Metap2	Q3TMN1	0.0595701	0.380165	-0.643985	0.0572733
Ccdc115	Q8VE99	0.49324	-0.100385	0.010423	0.917076
Tut1	Q8R3F9	0.0596946	-0.704911	-0.493684	0.134913
Clta	B1AWE0	0.0599139	-0.202266	0.349824	0.0600517
Hsd17b10	Q99N15	0.0006824	-0.269258	0.0996235	0.291807
Cnpy2	Q9QXT0	0.000375212	-0.272513	0.0718538	0.355581
Isoc2a	P85094	0.0176068	-0.272704	-0.140527	0.762618
Myh9	Q8VDD5	0.0607315	0.0480227	0.324546	5.92801e-05
Atp1b3	P97370	0.00188938	-0.273473	-0.026425	0.89132
Slc25a4	P48962	0.00520977	-0.274318	-0.0715638	0.236901
Hsd17b11	Q9EQ06	0.000253978	-0.274612	0.460097	0.268072
Polr2b	Q8CFI7	0.018911	-0.275073	-0.210252	0.434587
Mcm3	P25206	0.0616807	-0.0568983	-0.309051	0.00578458
Tspan31	Q9CQ88	0.323487	-0.0968326	0.0116693	0.968299
Gphn	A0JNY3	0.0620369	-0.198065	0.501445	0.0783782
Gnai2	P08752	0.000325916	-0.276246	0.119108	0.302379
Trappc3	O55013	0.00110104	-0.276914	-0.0827359	0.735461
Cpne3	Q8BT60	0.202327	0.0999729	0.0120294	0.936224
Arih1	Q9Z1K5	0.445229	0.0521984	0.0120407	0.963976
Yars	A2A7S7	1.38483e-06	-0.277872	0.0397861	0.473683
Noc2l	J3QK52	0.18711	0.0835425	0.012506	0.889602
Atp2b1	G5E829	0.00107862	-0.278446	0.0676409	0.521645
Copb2	O55029	0.0648896	0.148866	0.104792	0.130648
Mpst	Q3UW66	0.647723	0.278446	0.0127631	0.921629
Ptrh2	Q8R2Y8	0.757037	-0.0210673	0.0129522	0.922243
Gadd45gip1	Q9CR59	0.648161	0.207619	0.0133265	0.940957
Hibadh	Q99L13	0.00343413	-0.279431	-0.0233701	0.836709
Rps17	P63276	0.358493	0.106973	0.0136155	0.861082
Atp6v1d	P57746	0.00627775	-0.279559	-0.0410745	0.801424
Nmt1	O70310	0.0678312	0.211089	0.227412	0.0448524
Ap1m1	P35585	0.007307	-0.279826	0.0162046	0.956232
Ipo5	Q8BKC5	0.000879871	-0.279856	0.0893881	0.515436
Gatad2b	A1L3S7	0.0227664	-0.280022	-0.374172	0.463131
Ina	P46660	0.0703678	0.789227	-0.806075	0.0683491
Ube2v1	Q9CZY3	0.00727991	-0.280586	0.0453416	0.777463
Ankfy1	Q810B6	0.0710092	-0.102285	0.113596	0.0326803
Sub1	P11031	0.320142	-0.192447	0.0158308	0.917622
Ube2n	P61089	0.00350406	-0.283035	0.129113	0.703917
Ilkap	Q8R0F6	0.0728302	0.754762	-0.914683	0.043192
Osbpl8	B9EJ86	0.099185	-0.129353	0.0167721	0.611098
Gsdmd	Q9D8T2	0.00058752	-0.283409	0.12627	0.241011
Cpne1	Q8C166	0.0737832	0.263515	0.141661	0.120465
ATP8	P03930	0.541514	0.0371428	0.0171145	0.896728
Srsf4	Q542V3	0.00952145	-0.283413	-0.16734	0.743844
Phb	P67778	0.0678538	0.076471	0.0179304	0.807227
Colgalt1	Q8K297	0.000101577	-0.284295	-0.103522	0.345283
Eif4h	Q9WUK2-2	8.12203e-06	-0.287434	-0.159926	0.347744
Mbnl2	Q8C181-3	0.077256	0.22145	0.397638	0.111015
Mrps30	Q9D0G0	0.0067607	-0.288365	0.153917	0.641002
Ubqln1	Q8R317-2	0.0794826	-0.424604	0.0192356	0.869029
Adss	P46664	0.200245	-0.0786231	0.0193421	0.873055
Mecr	Q9DCS3	0.0783683	-0.160719	-0.314911	0.162932
Acot9	Q9R0X4	0.00538379	-0.288445	-0.00401447	0.972334
Snrpc	Q62241	0.0162527	-0.288565	0.0234559	0.856703
Dctn2	Q99KJ8	0.00346145	-0.290166	0.0745634	0.319776
Atp6v1c1	Q9Z1G3	0.000105497	-0.292988	0.0265074	0.744986
Lamp2	P17047-3	0.00020828	-0.293957	-0.227823	0.271636
Ctsc	P97821	0.0808691	-0.109853	0.275167	0.199106
Lap3	Q9CPY7-2	4.48659e-06	-0.294122	0.0402334	0.659543
Fam63a	Q76LS9-2	0.0143199	-0.296588	-0.0879004	0.287403
Prosc	Q9Z2Y8	0.0817586	0.136594	0.151252	0.0439813
Atp5k	Q06185	0.00458038	-0.29842	0.11831	0.495252
Mgea5	Q9EQQ9	0.927868	0.0105712	0.0211815	0.930125
Tkt	P40142	1.20192e-07	-0.298964	0.0228741	0.804044
Plxnb2	B2RXS4	0.0137241	-0.303269	0.0310786	0.832219
Fh1	P97807-2	0.00291739	-0.306685	-0.0807997	0.339173
Aldh3b1	Q80VQ0	0.0849679	-0.90074	0.0796074	0.143153
Esyt2	Q3TZZ7	0.886067	0.197304	0.0223039	0.896008
Lamtor3	O88653	0.000148621	-0.307199	0.0120112	0.96416
Dld	O08749	0.0864445	0.0743298	0.160737	0.111275
Ilk	O55222	0.0870706	0.124299	-0.300246	0.00922774
Lgals1	P16045	0.00010271	-0.308595	0.0541622	0.68
Rps26	P62855	0.0577044	0.147853	0.0225725	0.90211
Ndufaf2	Q59J78	0.814373	0.0492235	0.022709	0.96589
Nfs1	Q9Z1J3-2	0.575143	-0.0530523	0.0227843	0.93059
Rps16	P14131	2.85571e-05	-0.312649	-0.0789689	0.512757
H2	P01899	0.088234	0.105957	0.64749	0.00346803
Psip1	Q99JF8	0.00150609	-0.315652	0.258647	0.358588
Tsr1	Q5SWD9	0.0896991	0.181616	-0.33388	0.0553774
Hk3	Q3TRM8	8.12953e-06	-0.318404	-0.00923239	0.919116
Mrps6	P58064	0.0898406	1.12241	-0.331697	0.125532
Ilf3	Q9Z1X4	0.000274446	-0.320189	-0.037223	0.724348
Ap1b1	O35643	0.000153174	-0.32495	-0.26274	0.263568
Mrps15	Q9DC71	0.0695777	0.304883	0.0237789	0.930218
Clpp	O88696	0.118615	0.212406	0.0239917	0.80288
Slc25a3	Q8VEM8	0.0768844	-0.166907	0.0240501	0.807138
Rps14	P62264	0.207397	-0.0610398	0.0240514	0.77396
Golgb1	E9QAH1	0.0929219	1.27918	0.679434	0.0227643
Tcirg1	Q9JHF5	0.191577	0.0599703	0.0241642	0.725261
Vps29	D3YYD5	0.0603242	-0.13588	0.0242054	0.774886
Bri3bp	Q8BXV2	0.762958	0.0497106	0.0249481	0.925456
Aco2	Q99KI0	2.57837e-09	-0.325781	-0.0507396	0.443136
Atp5j2	P56135	0.180478	0.269064	0.0251282	0.841307
Prkcsh	O08795	6.26594e-05	-0.327332	0.0464137	0.430592
Ctbp2	Q91YZ2	0.237694	0.100059	0.0253964	0.850486
Mtap	Q9CQ65	1.7129e-05	-0.333368	-0.00809021	0.951476
Nhp2	Q9CRB2	0.0942665	0.153229	-0.212533	0.137256
Ostf1	Q62422	0.0948407	0.0971181	0.156228	0.173966
Akr1b3	P45376	0.0953327	0.0792766	0.0894491	0.172162
Sfxn1	Q99JR1	0.352643	0.0550616	0.0262373	0.842955
Top2b	Q64511	0.00418995	-0.33842	0.561268	0.519031
Tars	Q9D0R2	0.0593212	-0.0689913	0.0263215	0.520497
S100a10	P08207	0.000681921	-0.339588	-0.00547836	0.977183
Atad3a	Q925I1	0.7847	0.0174349	0.0267581	0.863739
Copg2	Q9QXK3	0.096105	-0.177889	-0.468521	0.109525
Inpp5d	Q9ES52-3	0.000164061	-0.339914	-0.106521	0.251889
Wnk1	P83741-4	0.0963343	-1.15484	-0.129045	0.0460703
Scamp1	Q3TSA8	0.00426648	-0.339919	0.35841	0.218415
Rbm3	O89086	0.0966478	-0.428475	-0.191368	0.15129
Trnt1	Q8K1J6	0.873743	0.00797197	0.0274566	0.854222
Uqcrb	Q9CQB4	0.0167369	-0.34005	-0.147025	0.285423
C1qbp	Q8R5L1	0.462678	-0.0453604	0.0274916	0.885136
Cotl1	Q9CQI6	8.404e-08	-0.340343	0.0294718	0.824374
Arpc3	Q9JM76	0.000659379	-0.341641	-0.0129557	0.894131
Rps7	P62082	0.318317	-0.0369081	0.0281354	0.569693
Rps20	P60867	0.000297261	-0.346004	-0.0145734	0.79718
Mrps18b	Q99N84	0.00103959	-0.347871	-0.312775	0.364868
Tnpo1	Q8BFY9-2	0.0985358	0.110283	-0.232145	0.161779
Rpl6	P47911	0.28017	0.0701086	0.0292816	0.74854
Rpl27a	P14115	0.331886	-0.123726	0.0293303	0.879149
Mthfd1l	Q3V3R1	0.183267	0.0545676	0.0294524	0.591087
Uqcrh	P99028	0.00379499	-0.348557	0.0747782	0.651657
Ide	F6RPJ9	0.000116534	-0.351139	0.0458884	0.734731
Brix1	Q9DCA5	0.10119	0.173566	-0.381697	0.075136
Hist1h1b	P43276	0.000102645	-0.352698	0.0553562	0.752725
Pon2	Q62086	0.0494279	-0.352848	0.0185356	0.94497
Abi1	B7ZCU4	0.102001	1.01548	0.156885	0.112206
Mbd3	F6WZH1	0.102128	0.40798	-0.512972	0.072658
Ewsr1	Q5SUT0	0.00298696	-0.354456	-0.210075	0.529608
P4hb	P09103	7.84845e-07	-0.354775	0.10662	0.235425
Slc25a11	Q9CR62	0.0142098	-0.358071	-0.113532	0.505748
Oxsr1	Q6P9R2	0.102956	-0.165529	0.593263	0.0854219
Ppa1	Q9D819	0.751329	0.0158802	0.0315772	0.759282
Ap2s1	P62743	0.104162	-0.196131	0.523338	0.0998096
Itgam	Q3U1U4	9.45571e-07	-0.361502	0.0658573	0.63561
Rpl31	P62900	0.185583	-0.0753546	0.0321955	0.769984
Prkcd	P28867	0.104718	0.10589	0.504071	0.0210039
Emb	P21995	0.00373839	-0.36476	-0.100524	0.454536
Mlec	Q6ZQI3	0.0054654	-0.365574	0.0580834	0.811679
Ccar2	Q8VDP4	0.102471	0.152246	0.0333199	0.892593
Map4	A0A0B4J1F2	0.0223401	-0.366	0.195003	0.294586
Akr1e1	Q9DCT1	0.0180463	-0.366524	-0.54304	0.213638
Cbx3	Q9DCC5	0.106757	0.0823547	-0.293626	0.0579303
Tra2b	P62996	0.107662	0.149306	-0.326812	0.190008
Pycr2	Q922Q4	0.81699	0.0077587	0.0344601	0.678854
Gpd1l	Q3ULJ0-2	0.889135	-0.00823792	0.0346265	0.885781
Dscr3	O35075	0.550563	0.325304	0.0346472	0.907815
Mri1	Q9CQT1	0.108634	-0.0713066	-0.18374	0.126295
Wdr26	Q8C6G8	0.00101414	-0.366953	0.0250079	0.82762
Tm9sf4	Q8BH24	0.108941	0.104957	0.590413	0.0992706
Cltb	Q6IRU5-2	0.109494	0.126716	-0.310257	0.0977766
Spag9	Q58A65-5	0.012657	-0.3685	0.191618	0.375753
Sec24c	G3X972	0.0157057	-0.369209	0.189432	0.314316
Prrc2c	S4R2J9	0.00125484	-0.370538	0.0367603	0.549939
Vti1b	Q91XH6	0.672186	-0.0543859	0.0350235	0.867698
Usp5	Q3U4W8	0.0875234	-0.0387674	0.0350282	0.218374
Plekha2	F8WIK5	0.111715	0.642005	-0.820964	0.00191881
Uap1l1	Q3TW96	6.34759e-08	-0.3713	0.0941908	0.425635
Gns	Q8BFR4	0.000742493	-0.372155	0.233856	0.265883
Ptcd3	Q14C51	0.000572216	-0.375602	-0.285397	0.221211
Cope	O89079	0.0769982	0.124689	0.0364132	0.437192
Atp6v1g1	Q9CR51	0.000196987	-0.378868	-0.230967	0.315168
Snrpa	D3Z0S6	0.0434068	-0.379357	-0.13503	0.629311
Ahcyl1	Q80SW1	0.959806	-0.00407975	0.0371105	0.568602
Rpl7	P14148	0.333922	0.0682568	0.0371409	0.440609
Fkbp15	Q6P9Q6	0.752302	0.0289132	0.0372251	0.786215
Mrps22	Q9CXW2	0.246936	-0.13213	0.0373294	0.816575
Ap2b1	Q9DBG3	2.24053e-05	-0.379481	-0.0106785	0.938523
Actl6a	Q9Z2N8	0.00126045	-0.379784	-0.305525	0.269634
Rhoa	Q9QUI0	0.000498561	-0.382656	0.0815605	0.391666
Trappc8	E9PWG2	0.0975414	-0.500632	0.0384465	0.854351
Ndc1	Q8VCB1	0.214588	0.307169	0.0386274	0.866142
Sh3gl1	Q62419	0.155112	0.132161	0.0387203	0.62014
Rps25	P62852	2.46076e-05	-0.384982	0.0262728	0.734004
Uqcrc2	Q9DB77	0.121525	-0.0358668	-0.200686	0.112492
Psmd5	Q8BJY1	0.121956	0.113006	0.298637	0.0160533
Smc3	Q9CW03	0.129598	-0.0694924	0.0392914	0.773401
Plaa	P27612	0.367429	-0.0630652	0.0394062	0.761639
B2m	P01887	0.122474	0.176232	0.54629	0.034225
Hdac2	P70288	0.122514	0.990238	-0.366723	0.0584741
Atp6v0d1	P51863	0.00221176	-0.387854	-0.144855	0.318827
Ddx23	D3Z0M9	0.123299	0.133962	-0.235891	0.156322
Rps3	P62908	1.48055e-05	-0.390676	-0.0662671	0.324083
Igbp1	Q61249	0.302302	0.105313	0.0398531	0.756956
Usp9x	Q4FE56	0.145314	-0.152249	0.0398766	0.802249
Gmds	Q8K0C9	0.0147789	-0.392955	-0.0377811	0.854798
Ctnnbl1	Q9CWL8	0.125724	0.281678	-0.563499	0.0949575
Ncbp2	Q9CQ49	0.125979	0.183543	-0.722522	0.0735624
Acadl	P51174	0.000723942	-0.393011	0.142735	0.251568
Pygb	Q8CI94	0.496892	-0.0634132	0.0411224	0.422866
Hadh	Q61425	0.00159441	-0.393528	-0.0390976	0.706124
Npc1	O35604	0.000559484	-0.3957	-0.0559784	0.824275
Cul4b	E9PXY1	0.128884	-0.158732	-0.409341	0.067479
Col4a3bp	Q9EQG9-2	0.12928	0.424633	0.497229	0.164326
Nrd1	A6PWC3	0.129564	-0.314443	0.165548	0.0488623
Gpnmb	Q99P91	0.0145259	-0.396241	0.110025	0.410013
Asph	A2AL85	0.130919	-0.0753047	-0.371872	0.129749
Brox	Q8K2Q7	0.131131	0.134873	-0.18244	0.199357
Ikbkap	Q7TT37	0.000944554	-0.398299	-0.233698	0.542264
Gnas	P63094	0.132643	0.123604	0.22873	0.0524224
Twf2	Q9Z0P5	5.34682e-05	-0.399159	-0.266328	0.212199
Mrpl44	Q9CY73	0.000104749	-0.401691	0.336437	0.203276
Diap1	Q6NS79	0.132055	0.127134	0.042786	0.867628
Pdcd6ip	Q9WU78	8.65734e-07	-0.402348	0.0573052	0.4725
Hnrnpd	Q60668-3	0.998883	-1.98781	0.0428252	0.303234
Msh6	P54276	0.13777	-0.145005	-0.538504	0.0233453
Csnk2a2	O54833	0.907814	-0.0130122	0.0431912	0.847421
Gmip	Q6PGG2	0.0788358	-0.166999	0.0434026	0.701206
Cox6c	Q9CPQ1	0.000179965	-0.40391	-0.0579624	0.607234
Ogt	Q8CGY8-2	0.138983	0.272387	-0.222994	0.130783
Aprt	P08030	0.796449	-0.0314703	0.0445199	0.657777
Eci1	P42125	0.000557275	-0.40431	-0.0641109	0.750169
Rps18	P62270	0.000270163	-0.407127	0.117496	0.478251
Pdia6	Q3TML0	1.67274e-06	-0.407309	0.100864	0.319379
Plekho2	Q8K124	0.14069	0.122153	0.294375	0.0673271
LOC105244208	P62754	0.76855	-0.0124049	0.0455162	0.619326
Rab18	P35293	0.141234	0.123216	0.37752	0.0557784
Lyar	Q08288	0.141626	0.145643	-0.355413	0.150099
Snrpe	P62305	0.141672	0.130338	-0.348784	0.00541128
Vdac2	Q60930	0.697721	-0.0169797	0.045563	0.693195
Rap2b	P61226	0.0137095	-0.408899	-0.167209	0.569388
Fcer1g	P20491	0.143177	-0.184773	0.315273	0.0898928
Phf5a	P83870	0.342774	0.0689242	0.0457444	0.352114
Mrpl22	Q8BU88	0.144036	-0.13453	-0.442163	0.174464
Tmx1	Q8VBT0	0.932627	-0.00648755	0.0458113	0.875872
Prdx4	O08807	3.56905e-05	-0.409604	0.0209563	0.832777
Pds5b	F8WHU5	0.14468	-0.162501	-0.385903	0.194822
Sptlc1	O35704	0.145199	0.228109	0.489937	0.013923
Arfgap2	Q99K28	0.539137	0.0870058	0.0460706	0.683802
Dbt	P53395	0.418539	0.0643693	0.046375	0.484896
Cpsf6	H3BJ30	0.146106	0.196033	-0.349717	0.0137954
Sirt2	Q8VDQ8-2	0.00119421	-0.414402	0.27621	0.428079
Abhd12	Q99LR1	0.147046	0.096097	-0.261713	0.105259
Sympk	F8WJD4	0.758842	0.0246538	0.0464219	0.907433
Dnajb1	Q9QYJ3	0.147789	0.198187	-0.533362	0.108128
LOC102642602	P67984	0.148349	0.0810166	0.122349	0.166737
Mthfd1	Q922D8	0.148396	0.0575268	-0.0705156	0.0572338
Mrps2	Q924T2	0.148755	-0.299945	-0.466701	0.0117753
Lsm8	Q6ZWM4	0.000326204	-0.41454	-0.183006	0.555473
Cd9	P40240	0.000617901	-0.416074	0.18857	0.30487
Ranbp10	Q6VN19	0.149357	-0.464729	-0.636257	0.195448
Cisd1	Q91WS0	0.00039624	-0.41639	-0.199526	0.271468
Rps9	Q6ZWN5	0.000470605	-0.41875	0.12018	0.561986
Msh2	P43247	0.151503	-0.168467	-0.459182	0.0345256
Otub1	D3YWF6	0.00054032	-0.419066	-0.00461224	0.981377
Emc10	D3Z665	0.033054	-0.423723	0.109544	0.800728
Nup62	Q63850	0.922534	0.00638394	0.0480163	0.638084
Vps26a	P40336	0.00404257	-0.429524	0.0270978	0.875216
Ndufv3	Q3U422	0.153465	-1.03244	-0.494574	0.0437138
Parvg	E9PYG5	0.0191875	-0.434937	-0.296889	0.416678
Hccs	P53702	0.153613	-0.893552	-0.393132	0.0993649
Cstb	Q62426	7.82936e-05	-0.438516	-0.00694912	0.974012
Actr3	Q99JY9	2.59915e-08	-0.438722	0.0563317	0.44359
Fkbp11	Q9D1M7	0.628728	-0.0527846	0.048995	0.724805
Arhgap17	E9QAJ9	0.155532	0.295675	-0.767876	0.143545
Lactb	Q9EP89	0.156584	0.20751	-0.251252	0.158683
Ccdc53	S4R1P7	0.000710601	-0.44047	-0.235127	0.526979
Mrps7	Q80X85	0.000876418	-0.441626	-0.626949	0.222206
Dync1h1	Q9JHU4	0.157895	0.0611403	0.0749832	0.145192
Tollip	A9JEI5	0.406445	0.129285	0.0498676	0.842229
Exosc10	Q8K366	0.0337424	-0.443456	0.119149	0.669764
Pycrl	Q9DCC4	0.00038369	-0.44437	-0.300843	0.275548
Fadd	Q61160	0.164307	-0.48706	-0.841606	0.161062
Ints9	Q8K114	0.0286081	-0.446456	-0.473214	0.229116
Acin1	F6RJ39	0.166118	0.0815091	-0.289077	0.161799
Napg	D3Z4B2	0.00141547	-0.447016	0.157717	0.411901
Nup85	Q8R480	0.00816055	-0.451154	-0.930869	0.593845
Stx8	O88983	0.167702	-0.72768	0.466861	0.1497
Ddx17	Q3U741	0.167985	0.0867121	0.0617663	0.129456
Emc1	Z4YJW0	0.578828	-0.0436292	0.053308	0.428647
U2surp	Q6NV83-3	0.169047	0.161691	-0.222567	0.0225222
Grwd1	Q810D6	0.169301	0.139665	-0.45603	0.00752213
H1f0	P10922	0.137473	-0.0953054	0.053368	0.740784
Myadm	O35682	0.712494	0.0706473	0.0540763	0.918002
Ppp6c	Q9CQR6	0.304573	-0.193201	0.0541334	0.779337
Commd8	Q9CZG3	0.171622	-0.210555	-0.579925	0.189098
Gmppa	Q922H4	0.000723349	-0.454451	0.00806482	0.980826
Kri1	V9GXJ9	0.174124	-0.955271	-0.37519	0.179971
Gmfb	Q9CQI3	0.175726	-0.172642	0.386569	0.125901
Gga1	Q8R0H9	0.0101476	-0.455958	0.163021	0.343561
Mrpl39	Q9JKF7	0.000736169	-0.458778	-0.0806909	0.824493
Rab3gap1	Q80UJ7	0.177042	0.257847	0.314573	0.0739006
Cul1	Q9WTX6	0.000860737	-0.459418	-0.133933	0.416561
LOC102641949	Q9D172	0.000113292	-0.46539	-0.117199	0.282387
Stk24	Q99KH8	0.177846	-0.130434	-0.164541	0.123832
Wash1	Q8VDD8	0.412957	0.122624	0.0545555	0.832091
Cops2	P61202	0.0133066	-0.466287	-0.00642961	0.952653
Pcyox1l	Q8C7K6	0.00920537	-0.466658	0.397088	0.387151
Hypk	Q9CR41	0.0297101	-0.467529	-0.182486	0.527989
Chmp3	Q9CQ10	0.00836188	-0.4677	0.0541869	0.846689
Ap1s1	P61967	0.181157	-0.313167	0.906716	0.027622
Ppp1r8	A2ADR8	0.182035	-0.799257	-0.66686	0.00325561
Plrg1	Q922V4	0.182068	0.157904	-0.305593	0.0545458
Rps6ka3	P18654	0.00196994	-0.468888	0.0667223	0.608579
Snrpf	P62307	0.245912	0.161317	0.0555613	0.838004
Fam114a2	Q8VE88-2	0.182805	-0.207904	-0.368316	0.129519
Rpl18a	P62717	0.727869	-0.025976	0.0558431	0.534107
Rps3a1	P97351	0.491725	-0.0331821	0.056189	0.47461
Mcts1	Q9DB27	0.000784426	-0.469614	-0.0549819	0.939515
Adssl1	J3QN31	0.00579044	-0.473317	0.0300827	0.898822
Shmt2	Q9CZN7	0.186096	0.0309612	-0.0942241	0.153773
Sgta	Q8BJU0-2	0.18623	-0.053991	-0.340649	0.155089
Lypla2	Q9WTL7	0.00615889	-0.473708	-0.0394373	0.723532
Rragc	Q99K70	0.0203851	-0.475299	-0.224764	0.540258
Lasp1	Q61792	0.863486	-0.00935543	0.0571155	0.28193
Cpsf7	Q8BTV2-2	0.0251008	-0.476788	-0.060651	0.836045
Ddx20	Q9JJY4	0.188029	0.253717	0.166828	0.0764757
Hibch	Q8QZS1	5.43703e-05	-0.478481	0.0305952	0.839756
Cstf1	Q99LC2	0.191754	-0.143665	-0.514575	0.111644
Gls	D3Z7P3	0.19266	0.358828	-0.325951	0.15835
Vps13c	Q8BX70-3	3.04027e-05	-0.479891	0.00838197	0.89175
Rnmt	Q9D0L8	0.000670857	-0.483017	-0.0403342	0.626047
Cpsf1	Q9EPU4	0.195938	0.176568	-0.755121	0.165141
Txn2	G3UZY2	0.00350055	-0.48877	-0.158233	0.478644
Tsnax	Q9QZE7	0.00060149	-0.489897	-0.279656	0.230425
Nolc1	E9Q5C9	0.197425	0.0529951	-0.269949	0.147897
Ganab	Q8BHN3	5.97599e-06	-0.490362	0.0396255	0.561159
Rplp2	P99027	1.68536e-05	-0.490537	-0.0388619	0.721074
Pfdn5	Q9WU28	0.00136397	-0.495805	0.042695	0.718399
Psmf1	Q8BHL8	0.198143	-0.589735	0.649905	0.0835527
Ppt1	O88531	4.14893e-05	-0.496191	-0.40697	0.261012
Dr1	Q91WV0	0.000256276	-0.496713	-0.177439	0.625052
Nceh1	Q8BLF1	0.199658	-0.081488	0.316613	0.0270929
Pafah1b2	Q61206	9.8614e-05	-0.498237	0.275827	0.22393
Ssr1	Q9CY50	0.32147	-0.121346	0.0593182	0.825657
Srm	Q64674	0.000263506	-0.501072	-0.0699604	0.218367
Mrps18c	Q8BTZ9	0.0151742	-0.501286	0.329131	0.490013
Mif	P34884	0.200654	-0.301274	-0.2506	0.157861
Unc119	B1AQD9	0.201024	-0.597886	-0.575031	0.0706498
Ndufs8	Q8K3J1	0.201185	-0.687317	-0.226575	0.0837808
Cryzl1	Q921W4	0.00250273	-0.502356	0.125536	0.598899
Gosr1	O88630	0.0982561	0.669841	0.0606192	0.658349
Prpf40a	Q9R1C7-2	0.202837	0.197165	-0.494895	0.126447
Hspe1	Q64433	0.232502	0.0554492	0.0608867	0.466176
Rufy1	Q8BIJ7	0.339088	-0.152517	0.0611116	0.825546
Thumpd3	P97770-2	0.196377	0.130986	0.0612151	0.559763
Gnb2	P62880	0.605696	-0.0237173	0.0620926	0.62541
Gbe1	F6ZHD8	0.206156	0.615239	0.696059	0.0469258
Rps27l	Q6ZWY3	0.89355	-0.192592	0.0634121	0.58127
Nudt2	P56380	0.206577	-0.168664	0.167643	0.193798
Twf1	Q91YR1	3.06185e-06	-0.503212	0.188044	0.401238
Eprs	Q8CGC7	0.207136	0.0467703	0.190586	0.0474126
Prrc1	Q3UPH1	0.562976	-0.1107	0.0644823	0.82896
Skiv2l	Q6NZR5	0.209463	0.167515	0.620251	0.191385
Stxbp5	D3Z2Q2	0.0185392	-0.506056	0.157079	0.634872
Nagk	Q9D997	0.00636986	-0.507754	0.355213	0.588112
Cdc42	P60766	1.01108e-06	-0.512055	-0.0561147	0.588516
Ehd4	Q9EQP2	0.213412	0.0598972	-0.351102	0.0275475
Cdk9	Q99J95-2	0.213427	-0.552847	-0.23531	0.151785
Timm44	O35857	0.205798	-0.0897837	0.0655989	0.659686
LOC102642884	P17665	0.000226074	-0.518492	-0.165111	0.497248
Ssu72	Q9CY97-2	0.0002715	-0.520244	-0.168097	0.603115
Nae1	E0CZE0	0.000481305	-0.523124	0.170615	0.447404
Ptpn1	P35821	0.217449	0.154177	0.533119	0.0337119
Rpl23a	P62751	0.504684	-0.030463	0.0664931	0.317259
Prkar2a	A0A0A6YX73	0.125191	-0.227141	0.0666546	0.828519
Wdr91	Q7TMQ7	0.0975129	-0.189111	0.0666638	0.692932
Snap29	Q9ERB0	0.000709184	-0.525478	-0.193089	0.623739
Rars2	Q3U186	0.00416214	-0.525516	0.104138	0.786205
Rfk	Q8CFV9	0.22017	0.356591	-0.594932	0.0735025
Ttc27	Q8CD92-2	0.218501	0.574727	0.0669203	0.798333
Ugdh	D3Z3F7	0.66891	-0.412565	0.0669921	0.810501
LOC102642088	Q9D358	0.000584284	-0.527301	-0.0247559	0.872586
Wdr82	Q8BFQ4	0.223908	0.572272	-0.487069	0.14798
Dcps	Q9DAR7	4.99697e-05	-0.528406	-0.202772	0.294641
Uqcc2	D3Z4C9	0.224621	-0.669376	-0.343531	0.149929
Hp1bp3	Z4YKB8	0.866476	0.0522734	0.0674991	0.442339
Gba	P17439	0.00305216	-0.528636	0.0687027	0.693491
Cacybp	Q9CXW3	5.68236e-06	-0.528779	-0.0723325	0.668446
Gstp1	P19157	0.000464504	-0.529747	0.0939006	0.543368
Nudt5	Q9JKX6	0.229309	0.117266	-0.0833442	0.0771914
Bid	P70444	0.32069	-0.164116	0.0680301	0.604271
Ethe1	Q9DCM0	0.230229	-0.611501	0.527997	0.058829
Eif2b3	B1AUN2	0.789759	-0.0179758	0.068397	0.438025
Enoph1	Q8BGB7-2	0.0155114	-0.533244	-0.0490321	0.807845
Bnip1	B8JJI4	0.0136805	-0.533384	0.463136	0.24768
Cltc	Q5SXR6	0.302805	-0.0347527	0.0692631	0.527093
Mapk3	D3Z3G6	0.00063781	-0.534336	0.188968	0.309834
Mrpl53	Q9D1H8	0.574446	-0.311647	0.0693357	0.638878
Fis1	G3X9U9	0.000967953	-0.535203	0.117482	0.873168
Tor1aip2	Q8BYU6	0.236427	0.217588	-0.8399	0.0713944
Atxn10	P28658	8.30847e-05	-0.536032	0.0125151	0.898047
Elovl1	Q9JLJ5	0.237571	0.311656	-0.491441	0.0984766
Mrps28	Q9CY16	0.423524	-0.171036	0.0698338	0.73361
Acot7	Q91V12-2	0.000289109	-0.537784	-0.00340995	0.975605
Rps12	Q6ZWZ6	1.7022e-05	-0.540635	0.0114022	0.897357
Mbnl1	A0A0A6YWB0	0.237996	-0.0661879	-0.224258	0.0576257
Stx7	Q8BH40	3.66592e-05	-0.541007	-0.0862761	0.652847
Usp7	F8VPX1	0.329995	0.043566	0.0706688	0.38803
Eif4a2	P10630	0.064961	0.826157	0.0711108	0.885917
Snrpd2	P62317	0.0959504	0.0896681	0.071112	0.673675
Ppp6r1	Q7TSI3	0.845335	-0.0162517	0.0713117	0.72545
Ptprc	S4R1M0	0.641429	0.0211918	0.0713181	0.535148
LOC102642507	Q78IK2	0.00334817	-0.548138	-0.0964836	0.772859
Sh3bgrl3	Q91VW3	0.0462775	-0.54946	0.17943	0.439368
Nob1	Q8BW10	0.248101	0.177621	-0.902371	0.0147278
Dynll1	P63168	0.0121356	-0.550665	-0.030826	0.906861
Pdxk	Q8K183	2.92547e-09	-0.553551	-0.0101486	0.880388
Mrpl49	Q9CQ40	0.251539	-0.686716	-0.783713	0.179991
Arf4	P61750	0.519043	-0.0933265	0.0735384	0.875559
Psmd3	P14685	0.117188	0.10568	0.07364	0.272239
Ncf4	P97369	0.254236	0.0669068	0.423407	0.0104291
Dut	Q9CQ43	0.255078	-0.113511	-0.374108	0.0487961
Tmed4	Q8R1V4	0.33865	-0.136903	0.0737791	0.732784
Pmpca	Q9DC61	0.256359	-0.0528967	-0.118248	0.089417
Epb4.1	A2A839	0.295364	0.784787	0.0737825	0.742688
Pgk1	P09411	1.59087e-06	-0.554715	0.0861436	0.43967
Gfpt1	P47856-2	0.25767	0.0854415	0.325058	0.178908
Stx12	Q9ER00	0.000603661	-0.555712	0.0542003	0.659032
Bag2	Q91YN9	0.0594368	0.137745	0.0740522	0.559676
Esd	H3BKH6	0.259976	-0.0480942	1.0244	0.00040225
Mapre2	Q8R001	0.280993	0.171429	0.0741353	0.736124
Aco1	P28271	3.14635e-07	-0.55616	0.0480705	0.389064
Celf2	V9GX43	0.261259	-0.734609	-0.413981	0.0189379
Rdh13	Q8CEE7	0.549461	0.215308	0.0745502	0.375156
Rab14	Q91V41	1.14901e-05	-0.567325	-0.118087	0.26174
Plin3	Q9DBG5	1.98896e-07	-0.567976	-0.003589	0.961197
Glg1	F8WHM5	0.000114795	-0.571091	0.0673495	0.56857
Mydgf	Q9CPT4	5.49705e-05	-0.57237	0.0497935	0.695575
Lmnb1	P14733	0.267247	0.0360375	-0.122094	0.0327314
Eif4b	Q8BGD9	2.82174e-05	-0.573329	0.0134514	0.864127
Hmox1	P14901	0.269037	0.333259	0.642075	0.00579391
Cdk4	E9Q9E4	0.00474493	-0.575177	-0.250967	0.218324
Rbm15	Q0VBL3	0.270796	0.747085	0.269861	0.0314237
Dnmt3a	O88508	0.271354	-0.253706	-0.285128	0.0907326
Sec63	Q8VHE0	0.488889	0.0844771	0.0771351	0.590149
Bre	D3Z7P0	8.16989e-05	-0.575949	0.0208335	0.943401
Arpc2	Q9CVB6	1.81746e-07	-0.578115	-0.00142464	0.988656
Zyx	Q62523	0.273278	0.687653	-0.307159	0.0363954
Prpsap2	Q8R574	1.28054e-05	-0.582775	0.0868729	0.838157
Ero1l	Q8R180	0.00033029	-0.589413	0.0588181	0.750937
Drap1	D3YYC2	0.00716657	-0.590928	-0.212382	0.425041
Ube4b	Q9ES00	4.85555e-05	-0.597548	-0.198285	0.258817
Tm9sf2	P58021	0.000259641	-0.598019	-0.243128	0.259194
Lonp1	Q8CGK3	0.27599	0.0506706	0.145595	0.0101313
Psmd4	O35226-4	0.353094	-0.415874	0.0808775	0.260377
Zpr1	F8WHU9	0.276964	0.120826	0.270849	0.030643
Fnbp1	A2AQ43	0.27766	0.315708	0.435352	0.16167
Psmd4	O35226-3	0.906874	-0.415874	0.0808775	0.260377
Ppp1r7	Q3UM45	0.000318003	-0.602189	-0.175077	0.251406
Psmb4	P99026	3.76731e-05	-0.602459	0.0805948	0.629191
Hnrnpm	Q9D0E1-2	0.278965	0.0555489	-0.0971538	0.0246814
Gars	Q9CZD3	1.44409e-05	-0.604674	0.0223825	0.833015
Prmt5	Q8CIG8	5.18211e-05	-0.606812	-0.0578171	0.660244
Uggt1	Q6P5E4	0.00133041	-0.616051	-0.00491072	0.930211
Nup188	Q6ZQH8	0.279929	0.0969983	0.437103	0.0711408
Naca	Q60817	9.31738e-07	-0.616957	-0.335649	0.366448
Capns1	D3YW48	0.00159766	-0.618667	-0.0147235	0.957287
Pafah1b1	P63005	0.739656	0.0249052	0.0823192	0.77803
Blvrb	Q923D2	0.282439	-0.0543604	1.09059	0.0030402
Tbc1d17	I6L974	0.283413	-0.376742	0.486983	0.126079
Hnrnpll	Q921F4	0.483354	-0.0273415	0.0831848	0.322343
Rab5a	Q9CQD1	0.898832	-0.0275758	0.0833267	0.830852
Osbp	Q3B7Z2	0.481562	-0.104504	0.0836062	0.875262
Idh3b	Q91VA7	0.286615	0.0978503	-0.170106	0.0862644
Cnpy3	Q9DAU1	8.50996e-05	-0.623496	0.138945	0.228719
Mapk1	P63085	0.287584	-0.24232	-0.132315	0.195393
Rraga	Q80X95	0.00224051	-0.625569	0.248469	0.436729
Pfdn2	O70591	5.68283e-07	-0.627125	0.0547558	0.641419
Bag6	G3UYQ2	0.291286	0.0839662	-0.127794	0.144171
Wdr18	Q4VBE8	0.29204	-0.140998	0.309118	0.129011
Cul2	Q9D4H8	0.760596	-0.0423312	0.0838927	0.721155
Gnb2l1	P68040	1.29003e-07	-0.627697	0.0205757	0.827004
Ywhah	P68510	0.293287	-0.0671011	-0.135615	0.0879078
Slc25a5	P51881	0.126063	-0.0828283	0.0844962	0.258545
Paf1	Q8K2T8	0.216905	0.366727	0.0845291	0.396492
Strap	Q9Z1Z2	0.296454	-0.0460359	-0.102715	0.168625
Comt	O88587-2	0.297712	-0.0938014	-0.292811	0.185118
Asah1	Q9WV54	2.12161e-05	-0.638685	0.0589548	0.455247
Rbx1	P62878	0.00366735	-0.653352	0.0116111	0.957241
Rps23	P62267	0.278275	-0.0441138	0.0846862	0.5887
Ilvbl	Q8BU33	0.300318	-0.412624	0.250188	0.199875
Cstf3	Q99LI7	0.00608453	-0.654352	-0.701274	0.285688
Fkbp2	P45878	0.000791666	-0.654395	0.128455	0.237528
Pon3	Q62087	0.235494	0.15438	0.0863101	0.399317
Rtfdc1	Q99K95	0.00119006	-0.654688	-0.27035	0.405656
Etf1	Q8BWY3	3.23732e-07	-0.658021	-0.0933407	0.509535
[truncated: 601 more rows]
